# Supplementary material for: Brønsted base-catalyzed assembly of sulfochromeno[4,3- b ]pyrrolidines via tandem [3 + 2] cycloaddition–SuFEx click reaction of ethenesulfonyl fluorides and o -hydroxyaryl azomethines
Source: Royal Society of Chemistry journal article supplement (doi:10.1039/d4qo01325e), 2024-01-01

## Supplementary Information

### **Brønsted Base-Catalyzed Assembly of Sulfochromeno[4,3-*b*]Pyrrolidines via Tandem [3+2] Cycloaddition-SuFEx Click Reaction of Ethenesulfonyl Fluorides and *o*-Hydroxyaryl Azomethines**

Fang Zhang,<sup>‡*a*</sup> Qichao Zhang,<sup>‡*a*</sup> Pei Xie,<sup>*a*</sup> Lin He,<sup>\* *a*</sup> Zhihua Cai,<sup>*a*</sup> Guangfen Du<sup>\* *a*</sup>

<sup>*a*</sup> State Key Laboratory Incubation Base for Green Processing of Chemical Engineering, School of Chemistry and Chemical Engineering, Shihezi University, Xinjiang Uygur Autonomous Region, 832000, China.

### Table of Contents

|                                                 |     |
|-------------------------------------------------|-----|
| 1. General information.....                     | S2  |
| 2. Synthesis of products.....                   | S3  |
| 3. Characterization data of products.....       | S7  |
| 4. Single-crystal X-ray structure analysis..... | S27 |
| 5. Computational details.....                   | S37 |
| 6. References.....                              | S72 |
| 7. Copies of NMR spectra.....                   | S74 |

## 1. General information.

Unless otherwise indicated, all reactions were conducted under air atmosphere in oven-dried glassware with magnetic stirring bar. All other chemicals were obtained from commercial supplies and used as received without any further purification.  $\beta$ -aryl-substituted ethenesulfonyl fluoride<sup>1</sup>, *o*-hydroxy aromatic aldimine<sup>2</sup>, glycine esters adlmines<sup>3</sup>, fluorinated phenoxo-imine<sup>4</sup> and arylideneaminoacetonitriles<sup>5</sup> were prepared according to literature procedures. Column chromatograph was performed with silica gel (200~300 mesh) and analytical TLC on silica gel 60-F<sub>254</sub>. <sup>1</sup>H, <sup>13</sup>C, <sup>19</sup>F NMR spectras were recorded on a Bruker AVANCE III spectrometer (400 MHz, 100 MHz and 376 MHz, respectively), Chemical shifts are reported parts per million (ppm) referenced to Chloroform-*d* ( $\delta$  7.26 ppm), tetramethylsilane (TMS,  $\delta$  0.00 ppm) for <sup>1</sup>H, <sup>13</sup>C and <sup>19</sup>F NMR. High-resolution mass spectra (HRMS) were obtained on a Q Exactive mass spectrometry and a LTQ Orbitrap XL mass spectrometry equipped with an APCI source from Thermo Scientific. X-Ray diffraction study for product **3a**, **3af**, **3am**, **4a** and **9a** were carried out on Bruker D8 VENTURE photon II diffractometer with I $\mu$ s 3.0 microfocus X-ray source using APEX III program. Melting points were recorded on INESA SGW X-4. Infrared absorption spectrum (IR) was recorded on Bruker vertex 70V using potassium bromide (KBr) as tableting.

## 2. Synthesis of products.

### 2.1 Synthesis of sulfochromeno[4,3-*b*]pyrrolidines (**3**).

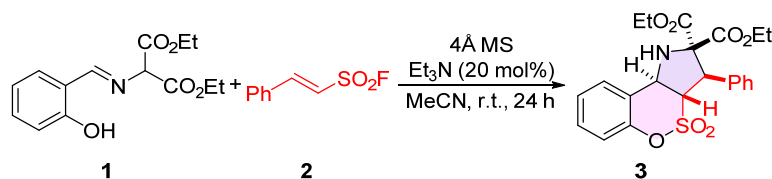

To a 10 mL reaction tube equipped with a magnetic stir bar was taken the *o*-hydroxyaryl azomethines **1** (0.20 mmol),  $\beta$ -arylethenesulfonyl fluorides **2** (0.20 mmol), 4 Å MS (200 mg), MeCN (2.0 mL) and Et<sub>3</sub>N (0.04 mmol) were added in turn to the reaction tube. The reaction mixture was stirred at ambient temperature for 24 h. When the reaction was finished (monitored by TLC). The crude products were purified by column chromatography (Petroleum ether / ethyl acetate = 7 : 1 (v / v) ) on silica gel to give the desired product **3**.

### 2.2 Gram-Scale Reaction for the sulfochromeno[4,3-*b*]pyrrolidines (**3a**, **3w**).

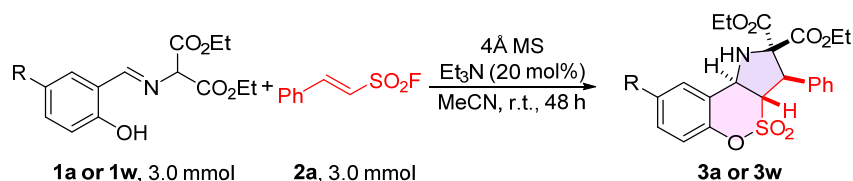

To a 50 mL reaction tube equipped with a magnetic stir bar was taken the *o*-hydroxyaryl azomethines **1a/1w** (3.0 mmol),  $\beta$ -phenylethenesulfonyl fluoride **2a** (3.0 mmol), 4 Å MS (3.0 g), MeCN (10.0 mL) and Et<sub>3</sub>N (0.6 mmol) were added in turn to the reaction tube. The reaction mixture was stirred at ambient temperature for 48 h. When the reaction was finished (monitored by TLC). The crude products were purified by column chromatography (Petroleum ether / ethyl acetate = 7 : 1 (v / v) ) on silica gel to give the desired product **3a/3w**.

### 2.4 Procedure for compound **4a**.

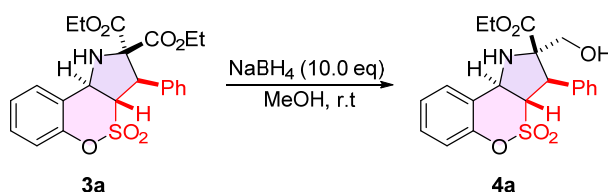

To a 10 mL reaction tube equipped with a magnetic stir bar was taken the **3a** (89.0 mg, 0.2 mmol) and MeOH (2.0 mL), and NaBH<sub>4</sub> (75.6 mg, 2.0 mmol) were added in

portions to the reaction tube. The reaction mixture was stirred 4 h until the complete consumption of **3a**. When the reaction was finished (monitored by TLC). The crude products were purified by column chromatography (Petroleum ether / ethyl acetate = 1 : 1 (v / v) ) on silica gel to give the desired product **4a** (White solid, 75%, 60.5 mg).

### 2.3 Procedure for compound **5w**.

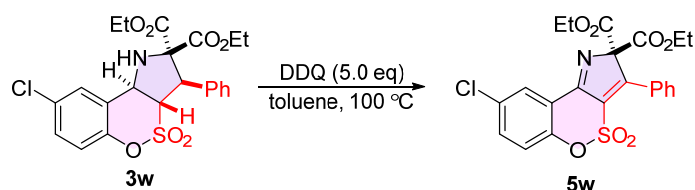

To a 10 mL reaction tube equipped with a magnetic stir bar was taken the **3w** (96.0 mg, 0.2 mmol) and DDQ (227.0 mg, 1.0 mmol), 2.0 mL of toluene was added to the tube and heated to 100 °C in a heating block. The reaction mixture was stirred 24 h until the complete consumption of **3w**. When the reaction was finished (monitored by TLC). The crude products were purified by column chromatography (Petroleum ether / ethyl acetate = 5 : 1 (v / v) ) on silica gel to give the desired product **5w** (Red solid, 70%, 66.6 mg).

### 2.5 Procedure for compound **9a**.

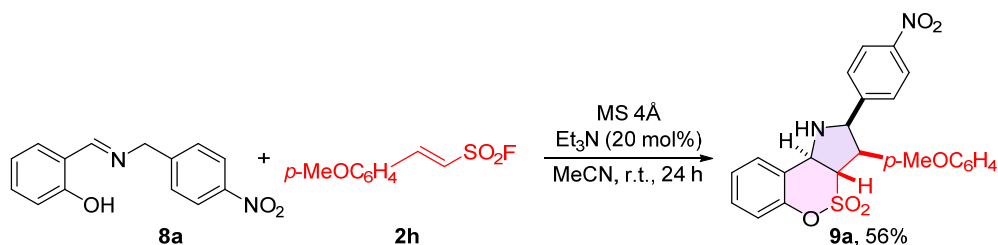

To a 10 mL reaction tube equipped with a magnetic stir bar was taken the *o*-hydroxyaryl azomethine **8a** (0.20 mmol),  $\beta$ -aryl ethenesulfonyl fluoride **2h** (0.20 mmol), 4Å MS (200 mg), MeCN (2.0 mL) and Et<sub>3</sub>N (0.04 mmol) were added in turn to the reaction tube. The reaction mixture was stirred at ambient temperature for 24 h. When the reaction was finished (monitored by TLC). The crude products were purified by column chromatography (Petroleum ether / dichloromethane = 1 : 2 (v / v) ) on silica gel to give the desired product **9a**.

## 2.6 Procedure for “one pot” experiment.

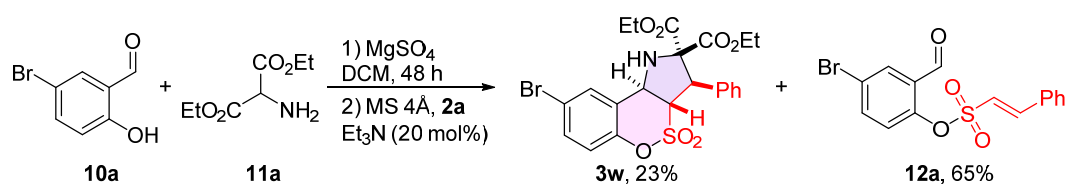

To a solution of salicylaldehyde **10a** (0.4 mmol, 2.0 equiv.) in DCM (2 mL), was added the diethyl aminomalonate **11a** (0.4 mmol, 2.0 equiv.) and  $\text{MgSO}_4$  (2.0 mmol, 10.0 equiv.). The  $\beta$ -phenylethenesulfonyl fluoride **2a** (0.2 mmol, 1.0 equiv.), 4Å MS (200 mg) and  $\text{Et}_3\text{N}$  (0.04 mmol) were added after the resulting mixture was stirred 48 h at RT. After the full conversion of the  $\beta$ -phenylethenesulfonyl fluoride **2a** the reaction mixture was concentrated under reduced pressure, and the residue was purified by column chromatography on silica gel (Petroleum ether / ethyl acetate = 10 : 1 to 5 : 1 (v / v)) to furnish the corresponding products.

## 2.7 Procedure for compound 12a.

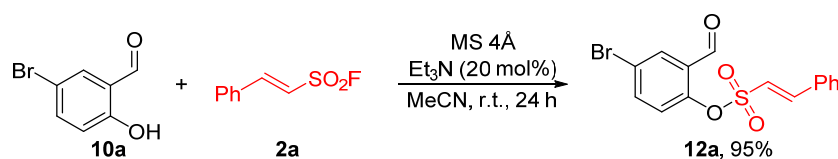

To a 10 mL reaction tube equipped with a magnetic stir bar was taken the salicylaldehyde **10a** (0.20 mmol),  $\beta$ -phenylethenesulfonyl fluoride **2a** (0.20 mmol), 4Å MS (200 mg), MeCN (2.0 mL) and  $\text{Et}_3\text{N}$  (0.04 mmol) were added in turn to the reaction tube. The reaction mixture was stirred at ambient temperature for 24 h. When the reaction was finished (monitored by TLC). The crude products were purified by column chromatography (Petroleum ether / ethyl acetate = 10 : 1 (v / v) ) on silica gel to give the desired product **12a**.

## 2.8 Procedure for compound 13a.

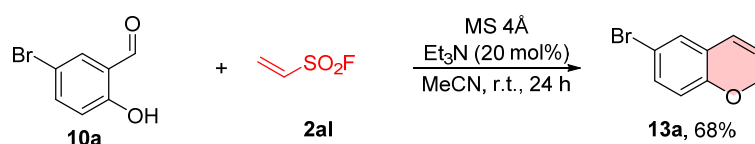

To a 10 mL reaction tube equipped with a magnetic stir bar was taken the salicylaldehyde **10a** (0.20 mmol), 4Å MS (200 mg), MeCN (2.0 mL) and  $\text{Et}_3\text{N}$  (0.04 mmol) were added in turn to the reaction tube, then ethenesulfonyl fluoride **2a1** (0.20 mmol, 18  $\mu\text{L}$ ) is added dropwise. The reaction mixture was stirred at ambient

temperature for 24 h. When the reaction was finished (monitored by TLC). The crude products were purified by column chromatography (Petroleum ether / ethyl acetate = 30 : 1 (v / v) ) on silica gel to give the desired product **13a**.

## 2.9 Procedure for intermediates to compound **3h**.

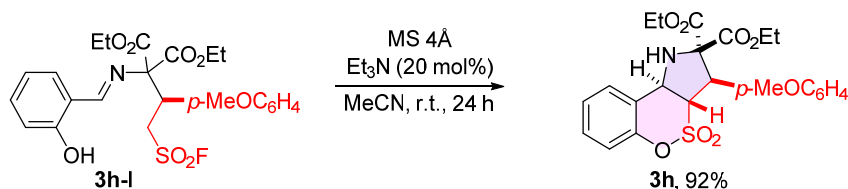

To a 10 mL reaction tube equipped with a magnetic stir bar was taken the compound **3h-I** (0.10 mmol), 4Å MS (100 mg), MeCN (1.0 mL) and Et<sub>3</sub>N (0.02 mmol) were added in turn to the reaction tube. The reaction mixture was stirred at ambient temperature for 24 h. When the reaction was finished (monitored by TLC). The crude products were purified by column chromatography (Petroleum ether / ethyl acetate = 7 : 1 (v / v) ) on silica gel to give the desired product **3h**.

## 2.10 Procedure for <sup>19</sup>F NMR experiments.

To a 10 mL reaction tube equipped with a magnetic stir bar was taken MeCN (2.0 mL) at 0 °C, *o*-hydroxyaryl azomethine **1a** (0.20 mmol),  $\beta$ -arylethenesulfonyl fluoride **2h** (0.20 mmol), 4Å MS (200 mg) and Et<sub>3</sub>N (0.04 mmol) were added in turn to the reaction tube. The reaction mixture was stirred at 0 °C for 5 min, aspirate 0.5 mL of the reaction solution for NMR analysis. When the reaction was stirring for 30 min, aspirate 0.5 mL of the reaction solution for NMR analysis. The reaction mixture was stirred at ambient temperature. When the reaction was finished (monitored by TLC, about 24 h), aspirate 0.5 mL of the reaction solution for NMR analysis.

### 3. Characterization data of products.

#### diethyl 3-phenyl-1,3,3a,9b-tetrahydro-2H-benzo [5,6] [1,2] oxathiino [4,3-b] pyrrole-2,2-dicarboxylate 4,4-dioxide (3a)

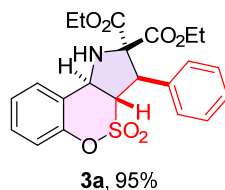

White solid, 84.6 mg, 95% yield, m.p. 182.1 – 182.4 °C.

<sup>1</sup>H NMR (400 MHz, Chloroform-*d*) δ 7.61 – 7.54 (m, 1H), 7.45 – 7.37 (m, 1H), 7.36 – 7.27 (m, 6H), 7.14 (dd, *J* = 8.4, 0.8 Hz, 1H), 5.00 (d, *J* = 12.4 Hz, 1H), 4.59 (d, *J* = 11.6 Hz, 1H), 4.49 – 4.39 (m, 1H), 4.35 – 4.24 (m, 1H), 3.87 – 3.77 (m, 2H), 3.65 (s, 1H), 3.39 – 3.29 (m, 1H), 1.32 (t, *J* = 7.2 Hz, 3H), 0.73 (t, *J* = 7.2 Hz, 3H).

<sup>13</sup>C NMR (100 MHz, Chloroform-*d*) δ 169.5, 168.8, 150.7, 133.9, 130.2, 128.7, 128.6, 128.4, 125.9, 125.8, 123.7, 118.2, 64.7, 62.9, 62.9, 60.7, 51.5, 14.1, 13.3.

IR (KBr, thin film): 3630, 2925, 2360, 2345, 1729, 1700, 1653, 1373, 1163, 764 cm<sup>-1</sup>.

HRMS (ESI) *m/z* calcd for C<sub>22</sub>H<sub>24</sub>NO<sub>7</sub>S [M+H]<sup>+</sup>: 466.1268, found 466.1272.

#### diethyl 3-(4-fluorophenyl)-1,3,3a,9b-tetrahydro-2H-benzo [5,6] [1,2] oxathiino [4,3-b] pyrrole-2,2-dicarboxylate 4,4-dioxide (3b)

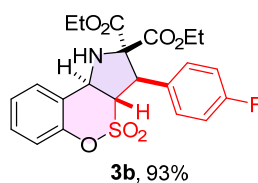

White solid, 86.2 mg, 93% yield, m.p. 201.1 – 201.4 °C.

<sup>1</sup>H NMR (400 MHz, Chloroform-*d*) δ 7.56 (d, *J* = 7.2 Hz, 1H), 7.40 (t, *J* = 7.6 Hz, 1H), 7.36 – 7.31 (m, 2H), 7.30 – 7.25 (m, 1H), 7.13 (d, *J* = 8.2 Hz, 1H), 7.02 (t, *J* = 8.6 Hz, 2H), 4.97 (d, *J* = 12.4 Hz, 1H), 4.57 (d, *J* = 11.6 Hz, 1H), 4.49 – 4.37 (m, 1H), 4.34 – 4.22 (m, 1H), 3.91 – 3.81 (m, 1H), 3.76 (t, *J* = 12.0 Hz, 1H), 3.60 – 3.00 (m, 2H), 1.32 (t, *J* = 7.2 Hz, 3H), 0.80 (t, *J* = 7.2 Hz, 3H).

<sup>13</sup>C NMR (100 MHz, Chloroform-*d*) δ 169.5, 168.7, 162.8 (d, *J* = 246.0 Hz), 150.7, 130.3, 130.2, 129.6 (d, *J* = 3.0 Hz), 125.9, 125.81, 123.6, 118.2, 115.6 (d, *J* = 21.0 Hz), 64.6, 62.9, 60.6, 50.7, 14.1, 13.4.

<sup>19</sup>F NMR (376 MHz, Chloroform-*d*) δ -113.33.

IR (KBr, thin film): 3649, 3546, 2361, 2342, 1734, 1700, 1653, 1457, 1395, 668 cm<sup>-1</sup>.

HRMS (ESI) *m/z* calcd for C<sub>22</sub>H<sub>23</sub>FN<sub>2</sub>O<sub>7</sub>S [M+H]<sup>+</sup>: 464.1174, found 464.1180.

#### diethyl 3-(4-chlorophenyl)-1,3,3a,9b-tetrahydro-2H-benzo [5,6] [1,2] oxathiino [4,3-b] pyrrole-2,2-dicarboxylate 4,4-dioxide (3c)

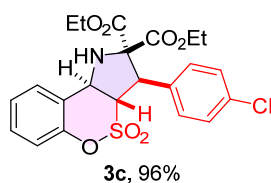

White solid, 92.1 mg, 96% yield, m.p. 220.1 – 220.4 °C.

**<sup>1</sup>H NMR** (400 MHz, Chloroform-*d*) δ 7.55 (d, *J* = 7.2 Hz, 1H), 7.40 (t, *J* = 7.6 Hz, 1H), 7.34 – 7.25 (m, 5H), 7.13 (d, *J* = 8.4 Hz, 1H), 4.95 (d, *J* = 12.4 Hz, 1H), 4.57 (d, *J* = 11.6 Hz, 1H), 4.49 – 4.37 (m, 1H), 4.34 – 4.22 (m, 1H), 3.90 – 3.80 (m, 1H), 3.76 (t, *J* = 12.0 Hz, 1H), 3.59 – 3.26 (m, 2H), 1.32 (t, *J* = 7.2 Hz, 3H), 0.80 (t, *J* = 7.2 Hz, 3H).

**<sup>13</sup>C NMR** (100 MHz, Chloroform-*d*) δ 169.4, 168.6, 150.6, 134.5, 132.4, 130.3, 129.8, 128.8, 125.9, 125.8, 123.5, 118.2, 64.4, 63.0, 60.7, 50.8, 14.0, 13.4.

**IR** (KBr, thin film): 3732, 2359, 2342, 1700, 1683, 1653, 1558, 1521, 677, 668 cm<sup>-1</sup>.

**HRMS** (ESI) *m/z* calcd for C<sub>22</sub>H<sub>23</sub>ClNO<sub>7</sub>S [M+H]<sup>+</sup>: 480.0878, found 480.0882.

**diethyl 3-(4-bromophenyl)-1,3,3a,9b-tetrahydro-2H-benzo [5,6] [1,2] oxathiino [4,3-*b*] pyrrole-2,2-dicarboxylate 4,4-dioxide (3d)**

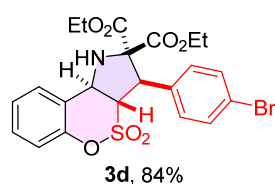

White solid, 88.1 mg, 84% yield, m.p. 177.6 – 178.2 °C.

**<sup>1</sup>H NMR** (400 MHz, Chloroform-*d*) δ 7.55 (d, *J* = 7.2 Hz, 1H), 7.46 (d, *J* = 8.0 Hz, 2H), 7.40 (t, *J* = 7.6 Hz, 1H), 7.31 – 7.20 (m, 3H), 7.13 (d, *J* = 8.0 Hz, 1H), 4.93 (d, *J* = 12.0 Hz, 1H), 4.57 (d, *J* = 11.2 Hz, 1H), 4.48 – 4.36 (m, 1H), 4.34 – 4.22 (m, 1H), 3.90 – 3.80 (m, 1H), 3.76 (t, *J* = 12.0 Hz, 1H), 3.51 – 2.89 (m, 2H), 1.32 (t, *J* = 7.2 Hz, 3H), 0.80 (t, *J* = 7.2 Hz, 3H).

**<sup>13</sup>C NMR** (100 MHz, Chloroform-*d*) δ 169.4, 168.6, 133.0, 131.8, 130.3, 130.1, 125.9, 125.8, 123.5, 122.6, 118.2, 64.3, 63.0, 60.7, 50.8, 14.0.

**IR** (KBr, thin film): 2984, 2908, 2359, 1729, 1418, 1386, 1303, 1211, 1162, 862 cm<sup>-1</sup>.

**HRMS** (ESI) *m/z* calcd for C<sub>22</sub>H<sub>24</sub>BrNO<sub>7</sub>S [M+H]<sup>+</sup>: 524.0373, found 524.0378.

**diethyl 3-(4-cyanophenyl)-1,3,3a,9b-tetrahydro-2H-benzo [5,6] [1,2] oxathiino [4,3-*b*] pyrrole-2,2-dicarboxylate 4,4-dioxide (3e)**

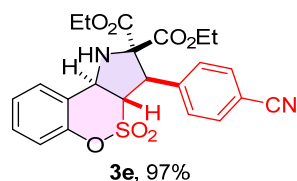

White solid, 91.2 mg, 97% yield, m.p. 260.1 – 260.5 °C.

**<sup>1</sup>H NMR** (400 MHz, Chloroform-*d*) δ 7.64 (d, *J* = 8.4 Hz, 2H), 7.56 (d, *J* = 7.6 Hz, 1H), 7.50 (d, *J* = 8.4 Hz, 2H), 7.45 – 7.38 (m, 1H), 7.33 – 7.27 (m, 1H), 7.14 (d, *J* = 8.0 Hz, 1H), 5.01 (d, *J* = 12.4 Hz, 1H), 4.59 (d, *J* = 11.6 Hz, 1H), 4.50 – 4.39 (m, 1H), 4.35 – 4.22 (m, 1H), 3.91 – 3.74 (m, 2H), 3.65 (s, 1H), 3.46 – 3.33 (m, 1H), 1.37 – 1.29 (m, 3H), 0.79 (t, *J* = 7.2 Hz, 3H).

**<sup>13</sup>C NMR** (100 MHz, Chloroform-*d*) δ 169.2, 168.3, 150.6, 139.4, 132.3, 130.4, 129.4, 126.0, 125.8, 123.2, 118.2, 112.4, 64.1, 63.2, 60.8, 51.1, 14.0, 13.4.



**IR** (KBr, thin film): 3676, 3630, 2368, 2344, 1734, 1700, 1653, 1559, 1419, 760  $\text{cm}^{-1}$ .  
**HRMS** (ESI)  $m/z$  calcd for  $\text{C}_{23}\text{H}_{23}\text{N}_2\text{O}_7\text{S}$   $[\text{M}+\text{H}]^+$ : 471.1221, found 471.1224.

**diethyl 3-(4-(trifluoromethyl)phenyl)-1,3,3a,9b-tetrahydro-2H-benzo [5,6] [1,2] oxathiino [4,3-*b*] pyrrole-2,2-dicarboxylate 4,4-dioxide (3f)**

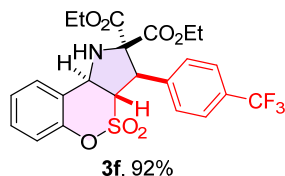

White solid, 94.4 mg, 92% yield, m.p. 186.2 – 186.8  $^{\circ}\text{C}$ .

**$^1\text{H}$  NMR** (400 MHz, Chloroform-*d*)  $\delta$  7.64 – 7.54 (m, 3H), 7.50 (d,  $J = 8.4$  Hz, 2H), 7.41 (t,  $J = 7.6$  Hz, 1H), 7.32 – 7.25 (m, 1H), 7.15 (d,  $J = 8.0$  Hz, 1H), 5.04 (d,  $J = 12.0$  Hz, 1H), 4.60 (d,  $J = 11.6$  Hz, 1H), 4.50 – 4.39 (m, 1H), 4.35 – 4.23 (m, 1H), 3.88 – 3.76 (m, 2H), 3.74 – 3.45 (m, 1H), 3.44 – 3.32 (m, 1H), 1.32 (t,  $J = 7.2$  Hz, 3H), 0.72 (t,  $J = 7.2$  Hz, 3H).

**$^{13}\text{C}$  NMR** (100 MHz, Chloroform-*d*)  $\delta$  169.3, 168.5, 150.7, 138.1, 130.9 (q,  $J = 33.0$  Hz), 130.4, 129.00, 126.0, 125.9, 125.6 (q,  $J = 4.0$  Hz), 124.0 (q,  $J = 271.0$  Hz), 123.4, 118.3, 64.3, 63.1, 63.1, 60.8, 51.1, 14.1, 13.2.

**$^{19}\text{F}$  NMR** (376 MHz, Chloroform-*d*)  $\delta$  -62.82.

**IR** (KBr, thin film): 3823, 3662, 2922, 2391, 1730, 1692, 1125, 1052, 1033, 781  $\text{cm}^{-1}$ .  
**HRMS** (ESI)  $m/z$  calcd for  $\text{C}_{23}\text{H}_{23}\text{F}_3\text{NO}_7\text{S}$   $[\text{M}+\text{H}]^+$ : 514.1142, found 514.1148.

**diethyl 3-(*p*-tolyl)-1,3,3a,9b-tetrahydro-2H-benzo [5,6] [1,2] oxathiino [4,3-*b*] pyrrole-2,2-dicarboxylate 4,4-dioxide (3g)**

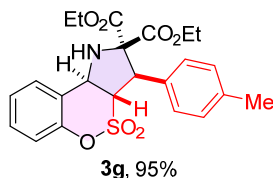

White solid, 87.3 mg, 95% yield, m.p. 208.6 – 209.1  $^{\circ}\text{C}$ .

**$^1\text{H}$  NMR** (400 MHz, Chloroform-*d*)  $\delta$  7.56 (d,  $J = 7.6$  Hz, 1H), 7.39 (t,  $J = 7.6$  Hz, 1H), 7.30 – 7.24 (m, 1H), 7.21 (d,  $J = 7.6$  Hz, 2H), 7.12 (d,  $J = 7.6$  Hz, 3H), 4.95 (d,  $J = 12.0$  Hz, 1H), 4.57 (d,  $J = 11.6$  Hz, 1H), 4.49 – 4.37 (m, 1H), 4.33 – 4.21 (m, 1H), 3.88 – 3.74 (m, 2H), 3.65 – 3.15 (m, 2H), 2.31 (s, 3H), 1.31 (t,  $J = 7.2$  Hz, 3H), 0.74 (t,  $J = 7.2$  Hz, 3H).

**$^{13}\text{C}$  NMR** (100 MHz, Chloroform-*d*)  $\delta$  169.5, 168.8, 150.7, 138.2, 130.7, 130.1, 129.3, 128.2, 125.8, 125.7, 123.7, 118.1, 64.7, 62.8, 60.6, 51.1, 21.1, 14.0, 13.2.

**IR** (KBr, thin film): 3641, 2391, 2349, 1728, 1532, 1386, 1370, 1213, 1162, 772  $\text{cm}^{-1}$ .  
**HRMS** (ESI)  $m/z$  calcd for  $\text{C}_{23}\text{H}_{26}\text{NO}_7\text{S}$   $[\text{M}+\text{H}]^+$ : 460.1425, found 460.1431.

**diethyl 3-(4-methoxyphenyl)-1,3,3a,9b-tetrahydro-2H-benzo[5,6][1,2]oxathiino [4,3-b]pyrrole-2,2-dicarboxylate 4,4-dioxide (3h)**

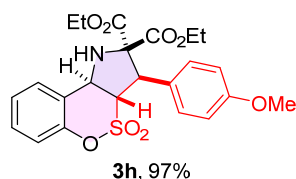

White solid, 92.2 mg, 97% yield, m.p. 207.2 – 207.8 °C.

**<sup>1</sup>H NMR** (400 MHz, Chloroform-*d*) δ 7.53 – 7.44 (m, 1H), 7.36 – 7.27 (m, 1H), 7.22 – 7.14 (m, 3H), 7.10 – 7.02 (m, 1H), 6.81 – 6.72 (m, 2H), 4.87 (d, *J* = 12.4 Hz, 1H), 4.49 (d, *J* = 11.6 Hz, 1H), 4.40 – 4.30 (m, 1H), 4.25 – 4.15 (m, 1H), 3.83 – 3.74 (m, 1H), 3.73 – 3.65 (m, 4H), 3.57 – 3.03 (m, 2H), 1.24 (t, *J* = 7.2 Hz, 3H), 0.72 (t, *J* = 7.2 Hz, 3H).

**<sup>13</sup>C NMR** (100 MHz, Chloroform-*d*) δ 169.6, 168.9, 159.7, 150.7, 130.2, 129.5, 125.8, 125.8, 125.7, 123.7, 118.2, 114.1, 64.7, 62.9, 62.8, 60.6, 55.4, 50.9, 14.1, 13.4.

**IR** (KBr, thin film): 3685, 3642, 2350, 1730, 1694, 1454, 1213, 1164, 1045, 832 cm<sup>-1</sup>.

**HRMS** (ESI) *m/z* calcd for C<sub>23</sub>H<sub>26</sub>NO<sub>8</sub>S [M+H]<sup>+</sup>: 476.1374, found 476.1381.

**diethyl 3-([1,1'-biphenyl]-4-yl)-1,3,3a,9b-tetrahydro-2H-benzo[5,6][1,2]oxathiino [4,3-b] pyrrole-2,2-dicarboxylate 4,4-dioxide (3i)**

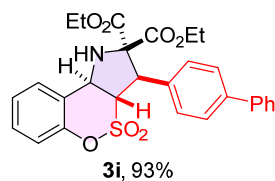

White solid, 97.0 mg, 93% yield, m.p. 201.3 – 201.7 °C.

**<sup>1</sup>H NMR** (400 MHz, Chloroform-*d*) δ 7.59 – 7.52 (m, 5H), 7.45 – 7.32 (m, 6H), 7.30 – 7.23 (m, 1H), 7.14 (d, *J* = 8.4 Hz, 1H), 5.05 (d, *J* = 12.4 Hz, 1H), 4.61 (d, *J* = 11.6 Hz, 1H), 4.50 – 4.39 (m, 1H), 4.35 – 4.24 (m, 1H), 3.88 – 3.76 (m, 2H), 3.68 – 3.31 (m, 2H), 1.32 (t, *J* = 7.2 Hz, 3H), 0.72 (t, *J* = 7.2 Hz, 3H).

**<sup>13</sup>C NMR** (100 MHz, Chloroform-*d*) δ 169.5, 168.8, 150.7, 141.4, 140.5, 132.9, 132.9, 130.2, 128.9, 128.8, 127.6, 127.3, 127.1, 125.8, 125.8, 123.6, 118.2, 76.8, 64.6, 62.9, 62.9, 60.8, 51.2, 14.1, 13.3.

**IR** (KBr, thin film): 3704, 3452, 2360, 2342, 1729, 1487, 1454, 1386, 1163, 776 cm<sup>-1</sup>.

**HRMS** (ESI) *m/z* calcd for C<sub>28</sub>H<sub>28</sub>NO<sub>7</sub>S [M+H]<sup>+</sup>: 522.1581, found 522.1585.

**diethyl 3-(4-((fluorosulfonyl)oxy)phenyl)-1,3,3a,9b-tetrahydro-2H-benzo [5,6] [1,2] oxathiino [4,3-b] pyrrole-2,2-dicarboxylate 4,4-dioxide (3j)**

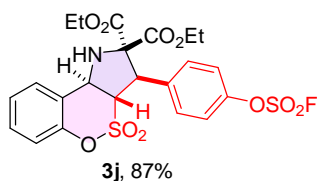

White solid, 94.5 mg, 87% yield, m.p. 230.5 – 231.1 °C.

**<sup>1</sup>H NMR** (400 MHz, Chloroform-*d*)  $\delta$  7.56 (d,  $J = 7.6$  Hz, 1H), 7.50 (d,  $J = 8.4$  Hz, 2H), 7.42 (t,  $J = 7.6$  Hz, 1H), 7.36 – 7.27 (m, 3H), 7.15 (d,  $J = 8.0$  Hz, 1H), 5.02 (d,  $J = 12.4$  Hz, 1H), 4.59 (d,  $J = 11.2$  Hz, 1H), 4.49 – 4.39 (m, 1H), 4.34 – 4.24 (m, 1H), 3.91 – 3.82 (m, 1H), 3.82 – 3.74 (m, 1H), 3.68 – 3.20 (m, 2H), 1.32 (t,  $J = 7.2$  Hz, 3H), 0.79 (t,  $J = 7.2$  Hz, 3H).

**<sup>13</sup>C NMR** (100 MHz, Chloroform-*d*)  $\delta$  169.3, 168.5, 150.6, 149.9, 135.0, 130.6, 130.4, 126.0, 125.8, 123.3, 121.3, 118.2, 77.6, 64.2, 63.2, 63.1, 60.8, 50.7, 14.0, 13.3.

**<sup>19</sup>F NMR** (376 MHz, Chloroform-*d*)  $\delta$  43.25.

**IR** (KBr, thin film): 3672, 3504, 2363, 2334, 1772, 1733, 1653, 1558, 1213, 919  $\text{cm}^{-1}$ .

**HRMS** (ESI)  $m/z$  calcd for  $\text{C}_{22}\text{H}_{23}\text{FNO}_{10}\text{S}_2$   $[\text{M}+\text{H}]^+$ : 544.0742, found 544.0749.

**diethyl 3-(3-fluorophenyl)-1,3,3a,9b-tetrahydro-2H-benzo [5,6] [1,2] oxathiino [4,3-*b*] pyrrole-2,2-dicarboxylate 4,4-dioxide (3k)**

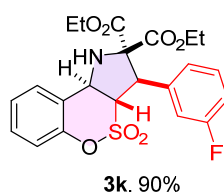

White solid, 83.4 mg, 90% yield, m.p. 165.2 – 165.9  $^{\circ}\text{C}$ .

**<sup>1</sup>H NMR** (400 MHz, Chloroform-*d*)  $\delta$  7.56 (d,  $J = 7.6$  Hz, 1H), 7.40 (t,  $J = 7.6$  Hz, 1H), 7.34 – 7.26 (m, 2H), 7.16 – 7.07 (m, 3H), 7.05 – 6.96 (m, 1H), 4.97 (d,  $J = 12.0$  Hz, 1H), 4.57 (d,  $J = 11.6$  Hz, 1H), 4.49 – 4.39 (m, 1H), 4.34 – 4.24 (m, 1H), 3.91 – 3.81 (m, 1H), 3.76 (t,  $J = 12.0$  Hz, 1H), 3.65 – 2.93 (m, 2H), 1.32 (t,  $J = 7.2$  Hz, 3H), 0.79 (t,  $J = 7.2$  Hz, 3H).

**<sup>13</sup>C NMR** (100 MHz, Chloroform-*d*)  $\delta$  169.3, 168.6, 162.8 (d,  $J = 245.0$  Hz), 150.7, 136.4 (d,  $J = 7.0$  Hz), 130.3, 130.3 (d,  $J = 8.0$  Hz), 125.9, 125.8, 123.9 (d,  $J = 3.0$  Hz), 123.5, 118.2, 115.9 (d,  $J = 23.0$  Hz), 115.5 (d,  $J = 21.0$  Hz), 64.6, 63.0, 63.0, 60.7, 51.0, 51.0, 14.1, 13.4.

**<sup>19</sup>F NMR** (376 MHz, Chloroform-*d*)  $\delta$  -112.26.

**IR** (KBr, thin film): 3657, 2992, 2380, 2320, 1729, 1590, 1551, 1455, 1157, 896  $\text{cm}^{-1}$ .

**HRMS** (ESI)  $m/z$  calcd for  $\text{C}_{22}\text{H}_{23}\text{FNO}_7\text{S}$   $[\text{M}+\text{H}]^+$ : 464.1174, found 464.1178.

**diethyl 3-(3-chlorophenyl)-1,3,3a,9b-tetrahydro-2H-benzo [5,6] [1,2] oxathiino [4,3-*b*] pyrrole-2,2-dicarboxylate 4,4-dioxide (3l)**

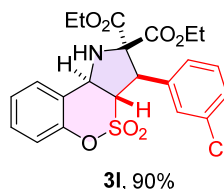

White solid, 86.3 mg, 90% yield, m.p. 177.3 – 178.1  $^{\circ}\text{C}$ .

**<sup>1</sup>H NMR** (400 MHz, Chloroform-*d*)  $\delta$  7.56 (d,  $J = 7.6$  Hz, 1H), 7.43 – 7.35 (m, 2H), 7.31 – 7.24 (m, 3H), 7.21 (d,  $J = 7.2$  Hz, 1H), 7.14 (d,  $J = 8.4$  Hz, 1H), 4.95 (d,  $J = 12.0$  Hz, 1H), 4.57 (d,  $J = 11.6$  Hz, 1H), 4.49 – 4.39 (m, 1H), 4.34 – 4.24 (m, 1H), 3.91 – 3.81 (m, 1H), 3.76 (t,  $J = 12.0$  Hz, 1H), 3.65 – 2.99 (m, 2H), 1.33 (t,  $J = 7.2$  Hz,

3H), 0.80 (t,  $J = 7.2$  Hz, 3H).

$^{13}\text{C}$  NMR (100 MHz, Chloroform-*d*)  $\delta$  169.3, 168.5, 150.6, 136.0, 134.6, 130.3, 130.0, 128.9, 128.7, 126.4, 125.9, 125.8, 123.5, 118.2, 64.5, 63.1, 63.0, 60.7, 51.0, 14.1, 13.3.  
IR (KBr, thin film): 3637, 2391, 1729, 1405, 1300, 1200, 1162, 1033, 832, 765  $\text{cm}^{-1}$ .  
HRMS (ESI)  $m/z$  calcd for  $\text{C}_{22}\text{H}_{23}\text{ClNO}_7\text{S}$   $[\text{M}+\text{H}]^+$ : 480.0878, found 480.0883.

**diethyl 3-(*m*-tolyl)-1,3,3a,9b-tetrahydro-2H-benzo [5,6] [1,2] oxathiino [4,3-*b*] pyrrole-2,2-dicarboxylate 4,4-dioxide (3m)**

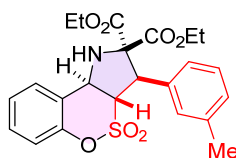

**3m**, 96%

White solid, 88.2 mg, 96% yield, m.p. 150.3 – 151.0  $^{\circ}\text{C}$ .

$^1\text{H}$  NMR (400 MHz, Chloroform-*d*)  $\delta$  7.57 (d,  $J = 7.2$  Hz, 1H), 7.39 (t,  $J = 8.0$  Hz, 1H), 7.31 – 7.24 (m, 1H), 7.20 (d,  $J = 7.6$  Hz, 1H), 7.16 – 7.04 (m, 4H), 4.96 (d,  $J = 12.4$  Hz, 1H), 4.57 (d,  $J = 11.6$  Hz, 1H), 4.49 – 4.37 (m, 1H), 4.34 – 4.23 (m, 1H), 3.86 – 3.74 (m, 2H), 3.41 – 3.32 (m, 1H), 2.32 (s, 3H), 1.32 (t,  $J = 7.2$  Hz, 3H), 0.73 (t,  $J = 7.2$  Hz, 3H).

$^{13}\text{C}$  NMR (100 MHz, Chloroform-*d*)  $\delta$  169.5, 168.7, 150.7, 138.3, 133.9, 130.2, 129.3, 129.2, 128.6, 125.8, 125.8, 125.2, 123.7, 118.1, 64.9, 62.9, 62.8, 60.7, 51.4, 21.4, 14.1, 13.3.

IR (KBr, thin film): 3647, 3200, 2952, 2385, 2316, 1728, 1668, 1162, 902, 772  $\text{cm}^{-1}$ .  
HRMS (ESI)  $m/z$  calcd for  $\text{C}_{23}\text{H}_{26}\text{NO}_7\text{S}$   $[\text{M}+\text{H}]^+$ : 460.1425, found 460.1433.

**diethyl 3-(3-methoxyphenyl)-1,3,3a,9b-tetrahydro-2H-benzo[5,6][1,2]oxathiino [4,3-*b*]pyrrole-2,2-dicarboxylate 4,4-dioxide(3n)**

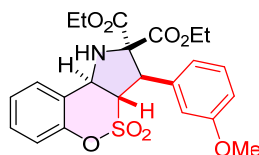

**3n**, 98%

White solid, 93.1 mg, 98% yield, m.p. 195.2 – 195.4  $^{\circ}\text{C}$ .

$^1\text{H}$  NMR (400 MHz, Chloroform-*d*)  $\delta$  7.56 (d,  $J = 7.6$  Hz, 1H), 7.43 – 7.34(m, 1H), 7.31 – 7.18 (m, 2H), 7.13 (d,  $J = 8.4$  Hz, 1H), 6.93 – 6.79 (m, 3H), 4.97 (d,  $J = 12.0$  Hz, 1H), 4.57 (d,  $J = 11.6$  Hz, 1H), 4.48 – 4.37 (m, 1H), 4.34 – 4.21 (m, 1H), 3.89 – 3.73 (m, 5H), 3.66 (s, 1H), 3.46 – 3.35 (m, 1H), 1.36 – 1.29 (m, 3H), 0.77 (t,  $J = 7.2$  Hz, 3H).

$^{13}\text{C}$  NMR (100 MHz, Chloroform-*d*)  $\delta$  169.4, 168.7, 159.8, 150.7, 135.4, 135.4, 130.2, 129.7, 125.8, 123.6, 120.3, 118.1, 114.2, 64.8, 62.9, 60.7, 55.4, 51.4, 14.1, 13.3.

IR (KBr, thin film): 3686, 3642, 2355, 1728, 1694, 1454, 1214, 1164, 1045, 762  $\text{cm}^{-1}$ .  
HRMS (ESI)  $m/z$  calcd for  $\text{C}_{23}\text{H}_{26}\text{NO}_8\text{S}$   $[\text{M}+\text{H}]^+$ : 476.1374, found 476.1381.

**diethyl 3-(2-chlorophenyl)-1,3,3a,9b-tetrahydro-2H-benzo [5,6] [1,2] oxathiino [4,3-*b*] pyrrole-2,2-dicarboxylate 4,4-dioxide (3o)**

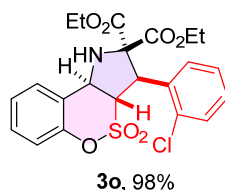

White solid, 94.1 mg, 98% yield, m.p. 219.5 – 219.9 °C.

**<sup>1</sup>H NMR** (400 MHz, Chloroform-*d*) δ 7.57 (d, *J* = 7.6 Hz, 1H), 7.47 – 7.36 (m, 2H), 7.30 – 7.19 (m, 3H), 7.16 – 7.07 (m, 2H), 5.67 (d, *J* = 11.6 Hz, 1H), 4.68 (d, *J* = 11.6 Hz, 1H), 4.48 – 4.36 (m, 1H), 4.36 – 4.25 (m, 1H), 3.93 – 3.83 (m, 1H), 3.80 – 3.51 (m, 2H), 3.45 – 3.30 (m, 2H), 1.32 (t, *J* = 7.2 Hz, 3H), 0.81 (t, *J* = 7.2 Hz, 3H).

**<sup>13</sup>C NMR** (100 MHz, Chloroform-*d*) δ 168.6, 168.1, 150.8, 136.0, 133.5, 130.3, 130.3, 129.6, 127.6, 127.0, 125.9, 125.8, 123.6, 118.2, 66.9, 63.0, 62.7, 60.4, 47.1, 14.1, 13.4.

**IR** (KBr, thin film): 3676, 3195, 2360, 2341, 1700, 1559, 1539, 1506, 1037, 768 cm<sup>-1</sup>.

**HRMS** (ESI) *m/z* calcd for C<sub>22</sub>H<sub>23</sub>ClNO<sub>7</sub>S [M+H]<sup>+</sup>: 480.0878, found 480.0884.

**diethyl 3-(*o*-tolyl)-1,3,3a,9b-tetrahydro-2H-benzo [5,6] [1,2] oxathiino [4,3-*b*] pyrrole-2,2-dicarboxylate 4,4-dioxide (3p)**

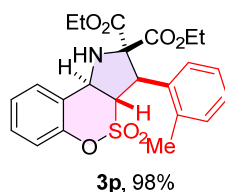

White solid, 90.0 mg, 98% yield, m.p. 200.2 – 200.6 °C.

**<sup>1</sup>H NMR** (400 MHz, Chloroform-*d*) δ 7.57 (d, *J* = 7.2 Hz, 1H), 7.39 (t, *J* = 7.6 Hz, 1H), 7.28 (t, *J* = 7.6 Hz, 1H), 7.23 – 7.06 (m, 4H), 6.96 (d, *J* = 7.6 Hz, 1H), 5.37 (d, *J* = 11.6 Hz, 1H), 4.56 (d, *J* = 11.6 Hz, 1H), 4.48 – 4.37 (m, 1H), 4.31 – 4.21 (m, 1H), 3.88 – 3.77 (m, 1H), 3.75 – 3.41 (m, 2H), 3.38 – 3.26 (m, 1H), 2.54 (s, 3H), 1.30 (t, *J* = 7.2 Hz, 3H), 0.74 (t, *J* = 7.2 Hz, 3H).

**<sup>13</sup>C NMR** (100 MHz, Chloroform-*d*) δ 169.4, 168.2, 150.8, 138.3, 133.8, 131.0, 130.2, 128.2, 126.3, 125.9, 125.8, 125.7, 123.9, 118.2, 68.0, 63.0, 62.7, 60.4, 46.6, 20.3, 14.1, 13.3.

**IR** (KBr, thin film): 3620, 3400, 2945, 2394, 1725, 1638, 1546, 1508, 1163, 805 cm<sup>-1</sup>.

**HRMS** (ESI) *m/z* calcd for C<sub>23</sub>H<sub>26</sub>NO<sub>7</sub>S [M+H]<sup>+</sup>: 460.1425, found 460.1429.

**diethyl 3-(4-bromo-3-methylphenyl)-1,3,3a,9b-tetrahydro-2H-benzo [5,6] [1,2] oxathiino [4,3-*b*] pyrrole-2,2-dicarboxylate 4,4-dioxide (3q)**

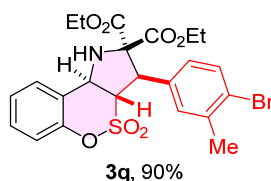

White solid, 96.9 mg, 90% yield, m.p. 207.1 – 207.8 °C.

**<sup>1</sup>H NMR** (400 MHz, Chloroform-*d*)  $\delta$  7.55 (d,  $J = 7.2$  Hz, 1H), 7.47 (d,  $J = 8.4$  Hz, 1H), 7.39 (t,  $J = 7.6$  Hz, 1H), 7.28 (t,  $J = 7.2$  Hz, 1H), 7.22 (s, 1H), 7.13 (d,  $J = 8.4$  Hz, 1H), 7.00 (d,  $J = 8.4$  Hz, 1H), 4.91 (d,  $J = 12.4$  Hz, 1H), 4.56 (d,  $J = 11.6$  Hz, 1H), 4.49 – 4.37 (m, 1H), 4.35 – 4.23 (m, 1H), 3.90 – 3.80 (m, 1H), 3.80 – 3.52 (m, 2H), 3.49 – 3.40 (m, 1H), 2.37 (s, 3H), 1.32 (t,  $J = 7.2$  Hz, 3H), 0.78 (t,  $J = 7.2$  Hz, 3H).  
**<sup>13</sup>C NMR** (100 MHz, Chloroform-*d*)  $\delta$  169.4, 168.6, 150.7, 138.3, 133.2, 132.6, 131.1, 130.3, 127.1, 125.9, 125.8, 125.1, 123.6, 118.2, 64.6, 63.0, 60.7, 50.9, 23.0, 14.1, 13.3.  
**IR** (KBr, thin film): 3683, 3557, 2399, 1726, 1530, 1513, 1386, 1162, 1033, 950  $\text{cm}^{-1}$ .  
**HRMS** (ESI)  $m/z$  calcd for  $\text{C}_{23}\text{H}_{25}\text{BrNO}_7\text{S}$   $[\text{M}+\text{H}]^+$ : 538.0530, found 538.0534.

**diethyl 3-(2,6-difluoropyridin-4-yl)-1,3,3a,9b-tetrahydro-2H-benzo [5,6] [1,2] oxathiino [4,3-*b*] pyrrole-2,2-dicarboxylate 4,4-dioxide (3r)**

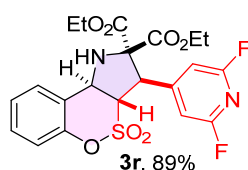

White solid, 85.8 mg, 89% yield, 198.2 – 198.4  $^{\circ}\text{C}$ .

**<sup>1</sup>H NMR** (400 MHz, Chloroform-*d*)  $\delta$  7.54 (d,  $J = 7.6$  Hz, 1H), 7.43 (t,  $J = 7.6$  Hz, 1H), 7.31 (t,  $J = 7.6$  Hz, 1H), 7.15 (d,  $J = 8.4$  Hz, 1H), 6.88 (s, 2H), 4.95 (d,  $J = 12.0$  Hz, 1H), 4.58 (d,  $J = 11.2$  Hz, 1H), 4.50 – 4.41 (m, 1H), 4.37 – 4.27 (m, 1H), 4.01 – 3.91 (m, 1H), 3.79 – 3.59 (m, 3H), 1.34 (t,  $J = 7.2$  Hz, 3H), 0.91 (t,  $J = 7.2$  Hz, 3H).

**<sup>13</sup>C NMR** (100 MHz, Chloroform-*d*)  $\delta$  169.0, 168.0, 162.0 (dd,  $J = 246.0, 16.0$  Hz), 153.5 (t,  $J = 8.0$  Hz), 150.5, 130.5, 126.2, 125.8, 123.0, 118.3, 106.3 (dd,  $J = 27.0, 14.0$  Hz), 63.7, 63.5, 63.4, 60.9, 50.25, 50.22, 50.2, 14.0, 13.5.

**<sup>19</sup>F NMR** (376 MHz, Chloroform-*d*)  $\delta$  -67.05.

**IR** (KBr, thin film): 3632, 2951, 2350, 1729, 1626, 1432, 1372, 1164, 1032, 761  $\text{cm}^{-1}$ .

**HRMS** (ESI)  $m/z$  calcd for  $\text{C}_{21}\text{H}_{21}\text{F}_2\text{N}_2\text{O}_7\text{S}$   $[\text{M}+\text{H}]^+$ : 483.1032, found 483.1035.

**diethyl 3-(naphthalen-2-yl)-1,3,3a,9b-tetrahydro-2H-benzo [5,6] [1,2] oxathiino [4,3-*b*] pyrrole-2,2-dicarboxylate 4,4-dioxide (3s)**

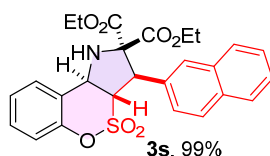

White solid, 98.1 mg, 99% yield, m.p. 221.5 – 221.7  $^{\circ}\text{C}$ .

**<sup>1</sup>H NMR** (400 MHz, Chloroform-*d*)  $\delta$  7.86 – 7.74 (m, 4H), 7.59 (d,  $J = 7.6$  Hz, 1H), 7.51 – 7.36 (m, 4H), 7.29 (t,  $J = 7.6$  Hz, 1H), 7.15 (d,  $J = 8.4$  Hz, 1H), 5.17 (d,  $J = 12.0$  Hz, 1H), 4.65 (d,  $J = 11.6$  Hz, 1H), 4.52 – 4.39 (m, 1H), 4.36 – 4.24 (m, 1H), 3.94 (t,  $J = 12.0$  Hz, 1H), 3.84 – 3.46 (m, 2H), 3.21 – 3.09 (m, 1H), 1.33 (t,  $J = 7.2$  Hz, 3H), 0.46 (t,  $J = 7.2$  Hz, 3H).

**<sup>13</sup>C NMR** (100 MHz, Chloroform-*d*)  $\delta$  169.6, 168.8, 150.8, 133.2, 133.2, 131.3, 130.2, 128.4, 128.1, 127.8, 127.6, 126.6, 126.5, 125.9, 125.8, 123.7, 118.2, 64.9, 62.8, 60.8, 51.6, 14.1, 13.1.

**IR** (KBr, thin film): 3451, 2970, 2363, 2344, 1719, 1685, 1654, 1559, 1165, 768  $\text{cm}^{-1}$ .  
**HRMS** (ESI)  $m/z$  calcd for  $\text{C}_{26}\text{H}_{26}\text{NO}_7\text{S}$   $[\text{M}+\text{H}]^+$ : 496.1424, found 496.1431.

**diethyl 3-(naphthalen-1-yl)-1,3,3a,9b-tetrahydro-2H-benzo [5,6] [1,2] oxathiino [4,3-*b*] pyrrole-2,2-dicarboxylate 4,4-dioxide (3t)**

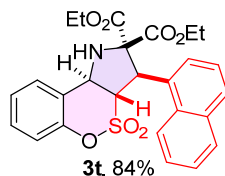

White solid, 84.2 mg, 84% yield, m.p. 253.1 – 253.6  $^{\circ}\text{C}$ .

**$^1\text{H}$  NMR** (400 MHz, Chloroform-*d*)  $\delta$  8.53 (d,  $J = 8.8$  Hz, 1H), 7.82 (dd,  $J = 21.2, 8.0$  Hz, 2H), 7.66 – 7.57 (m, 2H), 7.52 (t,  $J = 7.2$  Hz, 1H), 7.40 – 7.35 (m, 2H), 7.32 – 7.24 (m, 2H), 7.15 (d,  $J = 8.4$  Hz, 1H), 5.97 (d,  $J = 11.6$  Hz, 1H), 4.72 (d,  $J = 11.6$  Hz, 1H), 4.49 – 4.38 (m, 1H), 4.35 – 4.23 (m, 1H), 3.96 (t,  $J = 11.6$  Hz, 1H), 3.83 – 3.23 (m, 2H), 2.98 – 2.87 (m, 1H), 1.28 (t,  $J = 7.2$  Hz, 3H), 0.24 (t,  $J = 7.2$  Hz, 3H).

**$^{13}\text{C}$  NMR** (100 MHz, Chloroform-*d*)  $\delta$  169.4, 168.2, 150.9, 134.0, 132.9, 131.6, 130.3, 129.2, 128.7, 127.0, 126.2, 126.0, 125.8, 124.9, 124.0, 124.0, 123.6, 118.3, 78.2, 67.2, 63.1, 62.4, 60.6, 45.9, 14.1, 12.7.

**IR** (KBr, thin film): 3851, 3839, 3283, 2360, 2337, 1748, 1717, 1374, 1162, 764  $\text{cm}^{-1}$ .  
**HRMS** (ESI)  $m/z$  calcd for  $\text{C}_{26}\text{H}_{26}\text{NO}_7\text{S}$   $[\text{M}+\text{H}]^+$ : 496.1424, found 496.1430.

**diethyl 3-(thiophen-2-yl)-1,3,3a,9b-tetrahydro-2H-benzo [5,6] [1,2] oxathiino [4,3-*b*] pyrrole-2,2-dicarboxylate 4,4-dioxide (3u)**

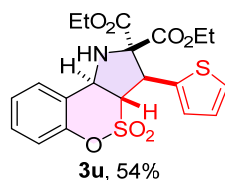

White solid, 48.7 mg, 54% yield, m.p. 176.3 – 176.8  $^{\circ}\text{C}$ .

**$^1\text{H}$  NMR** (400 MHz, Chloroform-*d*)  $\delta$  7.55 (d,  $J = 7.6$  Hz, 1H), 7.40 (t,  $J = 7.6$  Hz, 1H), 7.32 – 7.24 (m, 2H), 7.15 (d,  $J = 8.0$  Hz, 1H), 7.04 (d,  $J = 3.6$  Hz, 1H), 6.99 – 6.93 (m, 1H), 5.17 (d,  $J = 12.0$  Hz, 1H), 4.59 (d,  $J = 11.6$  Hz, 1H), 4.50 – 4.39 (m, 1H), 4.38 – 4.28 (m, 1H), 3.98 – 3.86 (m, 1H), 3.76 (t,  $J = 12.0$  Hz, 1H), 3.64 – 3.54 (m, 1H), 3.38 (s, 1H), 1.35 (t,  $J = 7.2$  Hz, 3H), 0.89 (t,  $J = 7.2$  Hz, 3H).

**$^{13}\text{C}$  NMR** (100 MHz, Chloroform-*d*)  $\delta$  169.4, 168.7, 150.6, 136.0, 130.2, 127.1, 127.0, 126.0, 125.9, 125.7, 123.8, 118.2, 66.0, 63.2, 60.6, 47.3, 14.1, 13.5.

**IR** (KBr, thin film): 3637, 3585, 2360, 2342, 1702, 1457, 1223, 1185, 1092, 784  $\text{cm}^{-1}$ .  
**HRMS** (ESI)  $m/z$  calcd for  $\text{C}_{20}\text{H}_{22}\text{NO}_7\text{S}_2$   $[\text{M}+\text{H}]^+$ : 452.0832, found 452.0837.

**diethyl 3-(thiophen-3-yl)-1,3,3a,9b-tetrahydro-2H-benzo[5,6][1,2]oxathiino[4,3-*b*]pyrrole-2,2-dicarboxylate 4,4-dioxide(3v)**

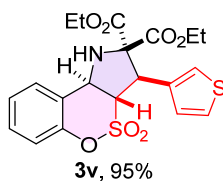

White solid, 85.6 mg, 95% yield, m.p. 168.2 – 168.8 °C.

**<sup>1</sup>H NMR** (400 MHz, Chloroform-*d*) δ 7.54 (d, *J* = 7.6 Hz, 1H), 7.43 – 7.36 (m, 1H), 7.31 – 7.27 (m, 3H), 7.14 (d, *J* = 8.0 Hz, 1H), 7.09 – 7.03 (m, 1H), 5.02 (d, *J* = 12.4 Hz, 1H), 4.57 (d, *J* = 11.6 Hz, 1H), 4.45 – 4.38 (m, 1H), 4.36 – 4.25 (m, 1H), 3.95 – 3.85 (m, 1H), 3.80 – 3.71 (m, 1H), 3.62 (s, 1H), 3.54 – 3.45 (m, 1H), 1.34 (t, *J* = 7.2 Hz, 3H), 0.89 (t, *J* = 7.2 Hz, 3H).

**<sup>13</sup>C NMR** (100 MHz, Chloroform-*d*) δ 169.6, 169.0, 150.6, 134.3, 130.1, 127.6, 125.8, 124.0, 123.8, 118.2, 65.1, 62.9, 60.6, 47.2, 14.1, 13.5.

**IR** (KBr, thin film): 3676, 3363, 2371, 2345, 1830, 1700, 1684, 1653, 1160, 847 cm<sup>-1</sup>.

**HRMS** (ESI) *m/z* calcd for C<sub>20</sub>H<sub>22</sub>NO<sub>7</sub>S<sub>2</sub> [M+H]<sup>+</sup>: 452.0832, found 452.0835.

**diethyl 8-chloro-3-phenyl-1,3,3a,9b-tetrahydro-2H-benzo[5,6][1,2]oxathiino[4,3-*b*]pyrrole-2,2-dicarboxylate 4,4-dioxide(3w)**

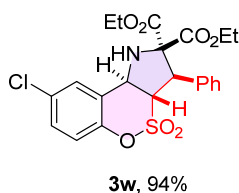

White solid, 90.1 mg, 94% yield, m.p. 219.5 – 219.9 °C.

**<sup>1</sup>H NMR** (400 MHz, Chloroform-*d*) δ 7.58 (d, *J* = 1.2, 1H), 7.38 – 7.29 (m, 6H), 7.08 (d, *J* = 8.8 Hz, 1H), 4.97 (d, *J* = 12.4 Hz, 1H), 4.60 – 4.51 (m, 1H), 4.49 – 4.38 (m, 1H), 4.32 – 4.22 (m, 1H), 3.87 – 3.77 (m, 2H), 3.63 (d, *J* = 12.4 Hz, 1H), 3.39 – 3.29 (m, 1H), 1.32 (t, *J* = 7.2 Hz, 3H), 0.73 (t, *J* = 7.2 Hz, 3H).

**<sup>13</sup>C NMR** (100 MHz, Chloroform-*d*) δ 169.3, 168.6, 149.1, 133.6, 131.3, 130.2, 128.8, 128.4, 126.0, 125.2, 119.6, 64.3, 63.0, 62.9, 60.4, 51.4, 14.1, 13.3.

**IR** (KBr, thin film): 3685, 3664, 2359, 1726, 1712, 1514, 1371, 1211, 1165, 802 cm<sup>-1</sup>.

**HRMS** (ESI) *m/z* calcd for C<sub>22</sub>H<sub>23</sub>ClNO<sub>7</sub>S [M+H]<sup>+</sup>: 480.0878, found 480.0885.

**diethyl 8-bromo-3-phenyl-1,3,3a,9b-tetrahydro-2H-benzo [5,6] [1,2] oxathiino [4,3-*b*] pyrrole-2,2-dicarboxylate 4,4-dioxide (3x)**

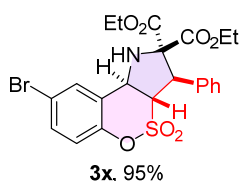

White solid, 99.4 mg, 95% yield, m.p. 268.1 – 268.8 °C.

**<sup>1</sup>H NMR** (400 MHz, Chloroform-*d*) δ 7.68 – 7.60 (m, 1H), 7.43 (dd, *J* = 8.8, 2.0 Hz, 1H), 7.24 (s, 5H), 6.94 (d, *J* = 8.4 Hz, 1H), 4.90 (d, *J* = 12.0 Hz, 1H), 4.55 – 4.43 (m,



1H), 4.41– 4.29 (m, 1H), 4.26 – 4.14 (m, 1H), 3.80 – 3.68 (m, 2H), 3.56 (d,  $J = 11.6$  Hz, 1H), 3.32 – 3.19 (m, 1H), 1.24 (t,  $J = 7.2$  Hz, 3H), 0.66 (t,  $J = 7.2$  Hz, 3H).

$^{13}\text{C}$  NMR (100 MHz, Chloroform-*d*)  $\delta$  169.3, 168.6, 149.7, 133.6, 133.2, 128.9, 128.8, 128.6, 128.4, 125.5, 119.9, 118.7, 64.3, 63.0, 62.9, 60.4, 51.4, 14.1, 13.3.

IR (KBr, thin film): 3729, 3612, 2361, 2341, 1774, 1733, 1652, 1557, 1205, 668  $\text{cm}^{-1}$ .

HRMS (ESI)  $m/z$  calcd for  $\text{C}_{22}\text{H}_{23}\text{BrNO}_7\text{S}$   $[\text{M}+\text{H}]^+$ : 524.0373, found 524.0375.

### diethyl 8-methyl-3-phenyl-1,3,3a,9b-tetrahydro-2H-benzo[5,6][1,2]oxathiino[4,3-*b*]pyrrole-2,2-dicarboxylate 4,4-dioxide (3y)

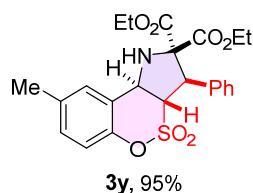

White solid, 87.2 mg, 95% yield, m.p. 170.6 – 171.2  $^{\circ}\text{C}$ .

$^1\text{H}$  NMR (400 MHz, Chloroform-*d*)  $\delta$  7.40 – 7.36 (m, 1H), 7.35 – 7.28 (m, 5H), 7.22 – 7.14 (m, 1H), 7.02 (d,  $J = 8.4$  Hz, 1H), 4.98 (d,  $J = 12.0$  Hz, 1H), 4.59 – 4.50 (m, 1H), 4.48 – 4.38 (m, 1H), 4.34 – 4.23 (m, 1H), 3.86 – 3.73 (m, 2H), 3.64 (s, 1H), 3.39 – 3.27 (m, 1H), 2.37 (s, 3H), 1.32 (t,  $J = 7.2$  Hz, 3H), 0.73 (t,  $J = 7.2$  Hz, 3H).

$^{13}\text{C}$  NMR (100 MHz, Chloroform-*d*)  $\delta$  169.6, 168.8, 148.7, 135.8, 134.0, 130.6, 128.7, 128.5, 126.1, 123.3, 117.9, 64.8, 62.9, 62.9, 60.8, 51.5, 20.9, 14.1, 13.3.

IR (KBr, thin film): 3774, 3642, 2396, 2282, 1726, 1713, 1653, 1547, 1203, 717  $\text{cm}^{-1}$ .

HRMS (ESI)  $m/z$  calcd for  $\text{C}_{23}\text{H}_{26}\text{NO}_7\text{S}$   $[\text{M}+\text{H}]^+$ : 460.1425, found 460.1433.

### diethyl 8-methoxy-3-phenyl-1,3,3a,9b-tetrahydro-2H-benzo[5,6][1,2]oxathiino [4,3-*b*]pyrrole-2,2-dicarboxylate 4,4-dioxide (3z)

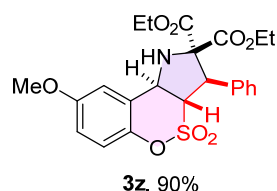

White solid, 85.5 mg, 90% yield, m.p. 187.2 – 187.6  $^{\circ}\text{C}$ .

$^1\text{H}$  NMR (400 MHz, Chloroform-*d*)  $\delta$  7.37 – 7.27 (m, 5H), 7.07 (d,  $J = 9.2$  Hz, 2H), 6.90 (dd,  $J = 8.8, 2.8$  Hz, 1H), 4.98 (d,  $J = 12.4$  Hz, 1H), 4.55 (d,  $J = 11.4$  Hz, 1H), 4.49 – 4.39 (m, 1H), 4.33 – 4.24 (m, 1H), 3.86 – 3.73 (m, 5H), 3.65 (s, 1H), 3.40 – 3.27 (m, 1H), 1.32 (t,  $J = 7.2$  Hz, 3H), 0.79 – 0.66 (m, 3H).

$^{13}\text{C}$  NMR (100 MHz, Chloroform-*d*)  $\delta$  169.5, 168.8, 157.4, 144.3, 134.0, 128.7, 128.6, 128.4, 124.8, 119.3, 115.7, 64.7, 62.9, 60.9, 56.1, 51.5, 14.1, 13.3.

IR (KBr, thin film): 3847, 3642, 2392, 1725, 1711, 1691, 1658, 1584, 1162, 815  $\text{cm}^{-1}$ .

HRMS (ESI)  $m/z$  calcd for  $\text{C}_{23}\text{H}_{26}\text{NO}_8\text{S}$   $[\text{M}+\text{H}]^+$ : 476.1374, found 476.1374.

### diethyl 7-chloro-3-phenyl-1,3,3a,9b-tetrahydro-2H-benzo[5,6][1,2]oxathiino[4,3-*b*]pyrrole-2,2-dicarboxylate 4,4-dioxide (3aa)

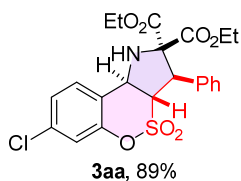

White solid, 87.2 mg, 91% yield, m.p. 174.5 – 174.8 °C.

**<sup>1</sup>H NMR** (400 MHz, Chloroform-*d*) δ 7.54 – 7.48 (m, 1H), 7.34 – 7.26 (m, 6H), 7.16 (d, *J* = 2.0 Hz, 1H), 4.98 (d, *J* = 12.4 Hz, 1H), 4.53 (t, *J* = 12.0 Hz, 1H), 4.48 – 4.38 (m, 1H), 4.33 – 4.22 (m, 1H), 3.86 – 3.75 (m, 2H), 3.61 (d, *J* = 12.4 Hz, 1H), 3.41 – 3.24 (m, 1H), 1.31 (t, *J* = 7.2 Hz, 3H), 0.73 (t, *J* = 7.2 Hz, 3H).

**<sup>13</sup>C NMR** (100 MHz, Chloroform-*d*) δ 169.4, 168.7, 150.9, 135.6, 133.7, 128.8, 128.7, 128.4, 126.9, 126.0, 122.0, 118.6, 64.6, 63.0, 60.4, 51.4, 14.1, 13.3.

**IR** (KBr, thin film): 3855, 3677, 3415, 3273, 2360, 1718, 1701, 1685, 1170, 920 cm<sup>-1</sup>.

**HRMS** (ESI) *m/z* calcd for C<sub>22</sub>H<sub>23</sub>ClNO<sub>7</sub>S [M+H]<sup>+</sup>: 480.0884, found 480.0883.

**diethyl 6,8-dichloro-3-phenyl-1,3,3a,9b-tetrahydro-2H-benzo[5,6][1,2]oxathiino[4,3-*b*]pyrrole-2,2-dicarboxylate 4,4-dioxide(3ab)**

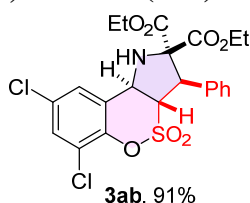

White solid, 93.5 mg, 91% yield, m.p. 168.7 – 168.2 °C.

**<sup>1</sup>H NMR** (400 MHz, Chloroform-*d*) δ 7.51 – 7.45 (m, 2H), 7.32 (s, 5H), 4.97 (d, *J* = 12.4 Hz, 1H), 4.58 (t, *J* = 10.8 Hz, 1H), 4.48 – 4.38 (m, 1H), 4.33 – 4.23 (m, 1H), 3.92 – 3.76 (m, 2H), 3.63 (d, *J* = 10.0 Hz, 1H), 3.41 – 3.29 (m, 1H), 1.32 (t, *J* = 7.2 Hz, 3H), 0.74 (t, *J* = 7.2 Hz, 3H).

**<sup>13</sup>C NMR** (100 MHz, Chloroform-*d*) δ 169.2, 168.5, 145.3, 133.3, 131.3, 130.6, 128.8, 128.8, 128.4, 126.7, 124.5, 124.3, 64.4, 63.1, 63.0, 60.6, 51.4, 27.0, 14.1, 13.3.

**IR** (KBr, thin film): 3578, 3555, 1753, 1712, 1630, 1468, 1376, 1215, 1034, 912 cm<sup>-1</sup>.

**HRMS** (ESI) *m/z* calcd for C<sub>22</sub>H<sub>22</sub>Cl<sub>2</sub>NO<sub>7</sub>S [M+H]<sup>+</sup>: 514.0494, found 514.0495.

**diethyl 6,8-dibromo-3-phenyl-1,3,3a,9b-tetrahydro-2H-benzo[5,6][1,2]oxathiino[4,3-*b*]pyrrole-2,2-dicarboxylate 4,4-dioxide(3ac)**

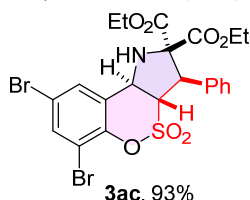

White solid, 111.6 mg, 93% yield, m.p. 219.5 – 220.1 °C.

**<sup>1</sup>H NMR** (400 MHz, Chloroform-*d*) δ 7.77 (d, *J* = 1.6 Hz, 1H), 7.67 (s, 1H), 7.32 (s, 5H), 4.96 (d, *J* = 12.4 Hz, 1H), 4.68 – 4.52 (m, 1H), 4.49 – 4.38 (m, 1H), 4.33 – 4.22 (m, 1H), 3.93 – 3.76 (m, 2H), 3.63 (d, *J* = 10.0 Hz, 1H), 3.40 – 3.30 (m, 1H), 1.32 (t, *J* = 7.2 Hz, 3H), 0.74 (t, *J* = 7.2 Hz, 3H).

$^{13}\text{C}$  NMR (100 MHz, Chloroform-*d*)  $\delta$  169.2, 168.5, 146.9, 136.3, 133.3, 128.8, 128.8, 128.4, 127.8, 127.0, 118.8, 113.1, 64.5, 63.0, 60.5, 51.3, 14.1, 13.3.  
IR (KBr, thin film): 3731, 3395, 2360, 1713, 1656, 1436, 1250, 1210, 1166, 852  $\text{cm}^{-1}$ .  
HRMS (ESI)  $m/z$  calcd for  $\text{C}_{22}\text{H}_{22}\text{Br}_2\text{NO}_7\text{S}$   $[\text{M}+\text{H}]^+$ : 601.9484, found 601.9484.

**diethyl 8-chloro-3-(4-chlorophenyl)-1,3,3a,9b-tetrahydro-2H-benzo[5,6][1,2]oxa-thiino [4,3-*b*]pyrrole-2,2-dicarboxylate 4,4-dioxide (3ad)**

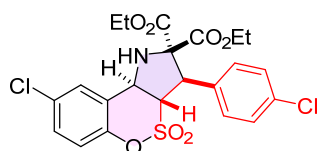

**3ad**, 93%

White solid, 95.6 mg, 93% yield, m.p. 192.4 – 192.9  $^{\circ}\text{C}$ .

$^1\text{H}$  NMR (400 MHz, Chloroform-*d*)  $\delta$  7.60 – 7.54 (m, 1H), 7.36 (dd,  $J = 8.8, 2.0$  Hz, 1H), 7.34 – 7.26 (m, 4H), 7.08 (d,  $J = 8.8$  Hz, 1H), 4.92 (d,  $J = 12.4$  Hz, 1H), 4.54 (d,  $J = 10.0$  Hz, 1H), 4.48 – 4.38 (m, 1H), 4.33 – 4.23 (m, 1H), 3.92 – 3.82 (m, 1H), 3.81 – 3.72 (m, 1H), 3.61 (s, 1H), 3.51 – 3.41 (m, 1H), 1.32 (t,  $J = 7.2$  Hz, 3H), 0.81 (t,  $J = 7.2$  Hz, 3H).

$^{13}\text{C}$  NMR (100 MHz, Chloroform-*d*)  $\delta$  169.3, 168.5, 149.0, 134.7, 132.1, 131.4, 130.3, 129.8, 128.9, 126.0, 125.0, 119.6, 64.0, 63.1, 60.4, 50.8, 14.1, 13.4.

IR (KBr, thin film): 3660, 3281, 2394, 2282, 1723, 1654, 1542, 1207, 1168, 815  $\text{cm}^{-1}$ .  
HRMS (ESI)  $m/z$  calcd for  $\text{C}_{22}\text{H}_{22}\text{Cl}_2\text{NO}_7\text{S}$   $[\text{M}+\text{H}]^+$ : 514.0489, found 514.0490.

**diethyl 8-chloro-3-(*p*-tolyl)-1,3,3a,9b-tetrahydro-2H-benzo[5,6][1,2]oxa-thiino[4,3-*b*]pyrrole-2,2-dicarboxylate 4,4-dioxide (3ae)**

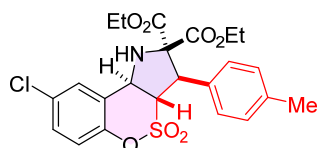

**3ae**, 99%

White solid, 97.6 mg, 99% yield, m.p. 254.2 – 254.6  $^{\circ}\text{C}$ .

$^1\text{H}$  NMR (400 MHz, Chloroform-*d*)  $\delta$  7.60 – 7.55 (m, 1H), 7.39 – 7.33 (m, 1H), 7.20 (d,  $J = 8.0$  Hz, 2H), 7.12 (d,  $J = 8.0$  Hz, 2H), 7.07 (d,  $J = 8.8$  Hz, 1H), 4.93 (d,  $J = 12.4$  Hz, 1H), 4.54 (d,  $J = 10.8$  Hz, 1H), 4.48 – 4.38 (m, 1H), 4.33 – 4.22 (m, 1H), 3.88 – 3.74 (m, 2H), 3.61 (s, 1H), 3.45 – 3.34 (m, 1H), 2.31 (s, 3H), 1.36 – 1.27 (m, 3H), 0.75 (t,  $J = 7.2$  Hz, 3H).

$^{13}\text{C}$  NMR (100 MHz, Chloroform-*d*)  $\delta$  169.4, 168.7, 149.1, 138.5, 131.3, 130.5, 130.2, 129.4, 128.3, 126.0, 125.3, 64.4, 60.4, 51.2, 21.2, 14.1, 13.3.

IR (KBr, thin film): 3802, 3650, 2362, 2342, 1733, 1684, 1558, 1507, 1165, 901  $\text{cm}^{-1}$ .  
HRMS (ESI)  $m/z$  calcd for  $\text{C}_{23}\text{H}_{25}\text{ClNO}_7\text{S}$   $[\text{M}+\text{H}]^+$ : 494.1035, found 494.1044.

**ethyl 3-phenyl-2,3,3a,9b-tetrahydro-1H-benzo[5,6][1,2]oxathiino[4,3-*b*]pyrrole-2-carboxylate 4,4-dioxide (3af)**

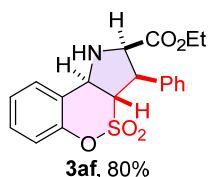

White solid, 59.7 mg, 80% yield, m.p. 254.3 – 254.7 °C.

**<sup>1</sup>H NMR** (400 MHz, Chloroform-*d*) δ 7.56 (d, *J* = 7.6 Hz, 1H), 7.43 – 7.38 (m, 1H), 7.35 – 7.27 (m, 4H), 7.21 (d, *J* = 7.6 Hz, 2H), 7.14 (d, *J* = 8.4 Hz, 1H), 4.60 (d, *J* = 11.2 Hz, 1H), 4.47 (d, *J* = 10.0 Hz, 1H), 4.24 (t, *J* = 10.8 Hz, 1H), 3.82 – 3.62 (m, 2H), 3.49 – 3.37 (m, 1H), 2.90 (s, 1H), 0.74 (t, *J* = 7.2 Hz, 3H).

**<sup>13</sup>C NMR** (100 MHz, Chloroform-*d*) δ 171.2, 150.8, 134.8, 130.2, 128.9, 128.4, 128.0, 125.8, 124.0, 118.2, 65.8, 65.3, 62.0, 61.8, 50.0, 13.5.

**IR** (KBr, thin film): 3849, 3730, 3267, 2359, 1716, 1558, 1540, 1455, 1274, 970 cm<sup>-1</sup>.

**HRMS** (ESI) *m/z* calcd for C<sub>19</sub>H<sub>20</sub>NO<sub>5</sub>S [M+H]<sup>+</sup>: 374.1057, found 374.1061.

**ethyl 3-(*p*-tolyl)-2,3,3a,9b-tetrahydro-1H-benzo[5,6][1,2]oxathiino[4,3-*b*] pyrrole-2-carboxylate 4,4-dioxide (3ag)**

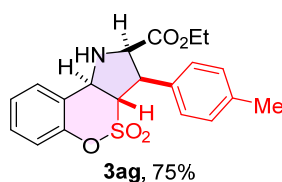

White solid, 58.0 mg, 75% yield, m.p. 196.7 – 197.2 °C.

**<sup>1</sup>H NMR** (400 MHz, Chloroform-*d*) δ 7.55 (d, *J* = 7.6 Hz, 1H), 7.43 – 7.36 (m, 1H), 7.31 – 7.25 (m, 1H), 7.16 – 7.06 (m, 5H), 4.58 (d, *J* = 11.2 Hz, 1H), 4.44 (d, *J* = 10.0 Hz, 1H), 4.26 – 4.16 (m, 1H), 3.81 – 3.71 (m, 1H), 3.66 (t, *J* = 11.6 Hz, 1H), 3.52 – 3.41 (m, 1H), 2.91 (s, 1H), 2.31 (s, 3H), 0.75 (t, *J* = 7.2 Hz, 3H).

**<sup>13</sup>C NMR** (100 MHz, Chloroform-*d*) δ 171.3, 138.1, 131.6, 130.1, 129.5, 127.9, 125.8, 125.8, 124.0, 118.1, 65.8, 65.3, 61.9, 49.6, 21.2, 13.4.

**IR** (KBr, thin film): 3778, 3652, 2394, 1762, 1726, 1725, 1653, 1547, 1203, 1015 cm<sup>-1</sup>.

**HRMS** (ESI) *m/z* calcd for C<sub>20</sub>H<sub>22</sub>NO<sub>5</sub>S [M+H]<sup>+</sup>: 388.1213, found 388.1215.

**ethyl 3-(4-chlorophenyl)-2,3,3a,9b-tetrahydro-1H-benzo[5,6][1,2]oxathiino[4,3-*b*]pyrrole-2-carboxylate 4,4-dioxide (3ah)**

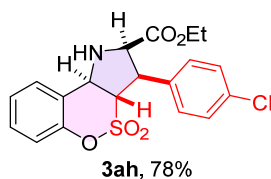

White solid, 63.5 mg, 78% yield, m.p. 196.0 – 196.4 °C.

**<sup>1</sup>H NMR** (400 MHz, Chloroform-*d*) δ 7.54 (d, *J* = 7.6 Hz, 1H), 7.43 – 7.36 (m, 1H), 7.33 – 7.26 (m, 3H), 7.20 – 7.11 (m, 3H), 4.57 (d, *J* = 11.6 Hz, 1H), 4.45 (d, *J* = 10.4

Hz, 1H), 4.18 (s, 1H), 3.83 – 3.73 (m, 1H), 3.63 (t,  $J = 11.6$  Hz, 1H), 3.54 – 3.44 (m, 1H), 2.92 (s, 1H), 0.80 (t,  $J = 7.2$  Hz, 3H).

$^{13}\text{C}$  NMR (100 MHz, Chloroform-*d*)  $\delta$  171.0, 150.8, 134.4, 133.4, 130.2, 129.4, 129.0, 125.9, 125.9, 123.8, 118.1, 65.6, 65.2, 62.0, 49.2, 13.6.

IR (KBr, thin film): 3849, 3730, 2359, 1830, 1732, 1716, 1653, 1568, 1212, 760  $\text{cm}^{-1}$ .

HRMS (ESI)  $m/z$  calcd for  $\text{C}_{19}\text{H}_{19}\text{ClNO}_5\text{S}$   $[\text{M}+\text{H}]^+$ : 408.0673, found 408.0675.

**ethyl 8-chloro-3-phenyl-2,3,3a,9b-tetrahydro-1H-benzo[5,6][1,2]oxathiino[4,3-*b*]pyrrole-2-carboxylate 4,4-dioxide (3ai)**

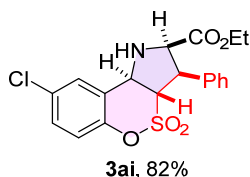

White solid, 66.7 mg, 82% yield, m.p. 203.1 – 203.5  $^{\circ}\text{C}$ .

$^1\text{H}$  NMR (400 MHz, Chloroform-*d*)  $\delta$  7.58 – 7.52 (m, 1H), 7.39 – 7.26 (m, 4H), 7.24 – 7.17 (m, 2H), 7.08 (d,  $J = 8.8$  Hz, 1H), 4.57 (d,  $J = 11.6$  Hz, 1H), 4.45 (d,  $J = 10.4$  Hz, 1H), 4.29 – 4.17 (m, 1H), 3.81 – 3.61 (m, 2H), 3.48 – 3.36 (m, 1H), 2.90 (s, 1H), 0.78 – 0.69 (m, 3H).

$^{13}\text{C}$  NMR (100 MHz, Chloroform-*d*)  $\delta$  171.1, 149.2, 134.4, 131.3, 130.1, 128.9, 128.5, 128.0, 126.0, 125.6, 119.5, 65.7, 64.9, 61.8, 49.9, 13.5.

IR (KBr, thin film): 3850, 3731, 2924, 2361, 1713, 1587, 1470, 1212, 1165, 795  $\text{cm}^{-1}$ .

HRMS (ESI)  $m/z$  calcd for  $\text{C}_{19}\text{H}_{19}\text{ClNO}_5\text{S}$   $[\text{M}+\text{H}]^+$ : 408.0673, found 408.0671.

**ethyl 8-bromo-3-phenyl-2,3,3a,9b-tetrahydro-1H-benzo[5,6][1,2]oxathiino[4,3-*b*]pyrrole-2-carboxylate 4,4-dioxide (3aj)**

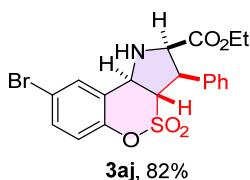

White solid, 74.0 mg, 82% yield, m.p. 212.2 – 212.7  $^{\circ}\text{C}$ .

$^1\text{H}$  NMR (400 MHz, Chloroform-*d*)  $\delta$  7.78 – 7.64 (m, 1H), 7.51 (dd,  $J = 9.6, 2.4$  Hz, 1H), 7.37 – 7.27 (m, 3H), 7.23 – 7.14 (m, 2H), 7.02 (d,  $J = 8.8$  Hz, 1H), 4.67 – 4.51 (m, 1H), 4.49 – 4.37 (m, 1H), 4.28 – 4.17 (m, 1H), 3.83 – 3.59 (m, 2H), 3.50 – 3.35 (m, 1H), 3.00 – 2.78 (m, 1H), 0.74 (t,  $J = 7.2$  Hz, 3H).

$^{13}\text{C}$  NMR (100 MHz, Chloroform-*d*)  $\delta$  171.1, 149.8, 134.4, 133.1, 129.0, 128.9, 128.5, 128.0, 126.0, 119.9, 118.7, 65.7, 64.9, 61.9, 61.7, 49.9, 13.5.

IR (KBr, thin film): 3792, 3685, 3395, 1723, 1693, 1639, 1615, 1384, 1164, 712  $\text{cm}^{-1}$ .

HRMS (ESI)  $m/z$  calcd for  $\text{C}_{19}\text{H}_{19}\text{BrNO}_5\text{S}$   $[\text{M}+\text{H}]^+$ : 452.0167, found 452.0167.

**diethyl 1, 3, 3a, 9b-tetrahydro-2H-benzo[5, 6][1, 2]oxathiino[4, 3-*b*]pyrrole-2,2-dicarboxylate 4,4-dioxide (3am)**

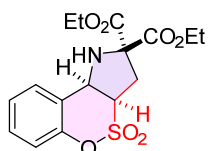

**3am**, 62%

White solid, 45.8 mg, 62% yield, m.p. 115.3 – 116.0 °C.

**<sup>1</sup>H NMR** (400 MHz, Chloroform-*d*) δ 7.50 (d, *J* = 7.2 Hz, 1H), 7.39 – 7.31 (m, 1H), 7.29 – 7.23 (m, 1H), 7.10 (d, *J* = 8.0 Hz, 1H), 4.88 (d, *J* = 7.6 Hz, 1H), 4.37 – 4.24 (m, 2H), 4.24 – 4.15 (m, 2H), 4.15 – 4.07 (m, 1H), 3.52 (s, 1H), 3.17 (dd, *J* = 14.8, 8.4 Hz, 1H), 2.98 (dd, *J* = 15.2, 6.4 Hz, 1H), 1.30 (t, *J* = 7.2 Hz, 3H), 1.23 (t, *J* = 7.2 Hz, 3H).

**<sup>13</sup>C NMR** (100 MHz, Chloroform-*d*) δ 170.3, 168.7, 150.0, 130.4, 130.3, 126.5, 123.0, 119.5, 72.0, 62.9, 62.7, 60.9, 58.8, 34.7, 14.1, 14.0.

**IR** (KBr, thin film): 3687, 3397, 1730, 1697, 1625, 1615, 1384, 1164, 1128, 712 cm<sup>-1</sup>.

**HRMS (APCI)** m/z: Calcd for C<sub>16</sub>H<sub>20</sub>NO<sub>7</sub>S [M+H]<sup>+</sup>: 370.0955; Found: 370.0958.

**diethyl 8-chloro-1,3,3a,9b-tetrahydro-2H-benzo[5,6][1,2]oxathiino[4,3-*b*]pyrrole-2,2-dicarboxylate 4,4-dioxide (3an)**

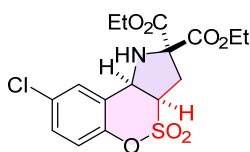

**3an**, 70%

White solid, 56.4 mg, 70% yield, m.p. 116.7 – 117.2 °C.

**<sup>1</sup>H NMR** (400 MHz, Chloroform-*d*) δ 7.51 (d, *J* = 2.4 Hz, 1H), 7.32 (dd, *J* = 8.8, 2.4 Hz, 1H), 7.05 (d, *J* = 8.8 Hz, 1H), 4.90 – 4.82 (m, 1H), 4.34 – 4.24 (m, 2H), 4.24 – 4.16 (m, 2H), 4.09 (dd, *J* = 15.6, 7.2 Hz, 1H), 3.57 (d, *J* = 8.8 Hz, 1H), 3.13 (dd, *J* = 14.8, 8.8 Hz, 1H), 3.03 – 2.93 (m, 1H), 1.31 (t, *J* = 7.2 Hz, 3H), 1.23 (t, *J* = 7.2 Hz, 3H).

**<sup>13</sup>C NMR** (100 MHz, Chloroform-*d*) δ 170.2, 168.5, 148.4, 131.9, 130.4, 130.2, 124.9, 120.9, 71.9, 63.0, 62.8, 60.5, 58.4, 34.5, 14.1, 14.0.

**IR** (KBr, thin film): 3837, 3650, 2995, 2361, 1734, 1700, 1559, 1473, 1163, 848 cm<sup>-1</sup>.

**HRMS (ESI)** m/z calcd for C<sub>16</sub>H<sub>19</sub>ClNO<sub>7</sub>S [M+H]<sup>+</sup>: 404.0571, found 404.0570.

**diethyl 8-bromo-1,3,3a,9b-tetrahydro-2H-benzo[5,6][1,2]oxathiino[4,3-*b*]pyrrole-2,2-dicarboxylate 4,4-dioxide (3ao)**

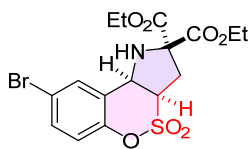

**3ao**, 67%

White solid, 60.0 mg, 67% yield, m.p. 121.8 – 122.3 °C.

**<sup>1</sup>H NMR** (400 MHz, Chloroform-*d*) δ 7.66 (d, *J* = 2.0 Hz, 1H), 7.50 – 7.42 (m, 1H), 6.99 (d, *J* = 8.8 Hz, 1H), 4.89 – 4.82 (m, 1H), 4.35 – 4.24 (m, 2H), 4.24 – 4.16 (m, 2H), 4.09 (q, *J* = 7.6 Hz, 1H), 3.57 (d, *J* = 8.8 Hz, 1H), 3.18 – 3.08 (m, 1H), 2.98 (dd, *J* = 14.8, 6.8 Hz, 1H), 1.31 (t, *J* = 7.2 Hz, 3H), 1.24 (t, *J* = 7.2 Hz, 3H).

$^{13}\text{C}$  NMR (100 MHz, Chloroform-*d*)  $\delta$  170.2, 168.5, 149.0, 133.3, 133.2, 125.2, 121.2, 119.4, 71.9, 63.0, 62.8, 60.5, 58.5, 34.5, 14.1, 14.0.

IR (KBr, thin film): 3673, 3649, 2394, 1733, 1557, 1475, 1376, 1163, 1114, 795  $\text{cm}^{-1}$ .

HRMS (ESI)  $m/z$  calcd for  $\text{C}_{16}\text{H}_{19}\text{BrNO}_7\text{S}$   $[\text{M}+\text{H}]^+$ : 448.0066, found 448.0067.

**diethyl 6, 8-dichloro-1, 3, 3a, 9b-tetrahydro-2H-benzo[5, 6][1, 2]oxathiino[4, 3-*b*]pyrrole-2,2-dicarboxylate 4,4-dioxide (3ap)**

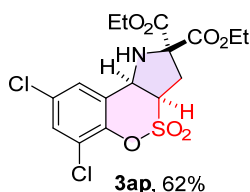

White solid, 54.2 mg, 62% yield, m.p. 125.3 – 125.8  $^{\circ}\text{C}$ .

$^1\text{H}$  NMR (400 MHz, Chloroform-*d*)  $\delta$  7.73 (d,  $J$  = 2.0 Hz, 1H), 7.60 (d,  $J$  = 2.0 Hz, 1H), 4.88 (t,  $J$  = 8.0 Hz, 1H), 4.36 – 4.25 (m, 2H), 4.25 – 4.19 (m, 2H), 4.12 (q,  $J$  = 7.6 Hz, 1H), 3.55 (d,  $J$  = 8.4 Hz, 1H), 3.12 (dd,  $J$  = 14.8, 8.4 Hz, 1H), 3.03 – 2.93 (m, 1H), 1.31 (t,  $J$  = 7.2 Hz, 3H), 1.26 – 1.22 (m, 3H).

$^{13}\text{C}$  NMR (100 MHz, Chloroform-*d*)  $\delta$  170.2, 168.4, 146.2, 136.3, 132.1, 127.0, 119.5, 114.3, 71.8, 63.1, 62.9, 60.6, 58.8, 34.5, 14.1, 14.0.

IR (KBr, thin film): 3854, 3638, 2392, 1734, 1446, 1383, 1278, 1156, 1045, 791  $\text{cm}^{-1}$ .

HRMS (ESI)  $m/z$  calcd for  $\text{C}_{16}\text{H}_{18}\text{Cl}_2\text{NO}_7\text{S}$   $[\text{M}+\text{H}]^+$ : 438.0181, found 438.0180.

**diethyl 6, 8-dibromo-1, 3, 3a, 9b-tetrahydro-2H-benzo[5, 6][1, 2]oxathiino[4, 3-*b*]pyrrole-2,2-dicarboxylate 4,4-dioxide (3aq)**

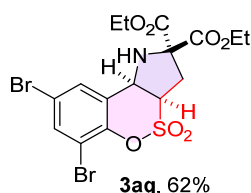

White solid, 65.0 mg, 62% yield, m.p. 140.7 – 141.2  $^{\circ}\text{C}$ .

$^1\text{H}$  NMR (400 MHz, Chloroform-*d*)  $\delta$  7.74 (d,  $J$  = 2.4 Hz, 1H), 7.60 (d,  $J$  = 2.0 Hz, 1H), 4.88 (t,  $J$  = 6.8 Hz, 1H), 4.38 – 4.17 (m, 4H), 4.16 – 4.06 (m, 1H), 3.55 (d,  $J$  = 6.4 Hz, 1H), 3.19 – 3.07 (m, 1H), 2.97 (dd,  $J$  = 15.2, 7.2 Hz, 1H), 1.31 (t,  $J$  = 7.2 Hz, 3H), 1.25 (t,  $J$  = 7.2 Hz, 3H).

$^{13}\text{C}$  NMR (100 MHz, Chloroform-*d*)  $\delta$  170.2, 168.4, 146.3, 136.3, 132.1, 127.0, 119.5, 114.4, 71.8, 63.1, 62.9, 60.7, 58.8, 34.5, 14.1, 14.0.

IR (KBr, thin film): 3731, 3626, 2985, 2360, 1732, 1556, 1537, 1188, 1158, 832  $\text{cm}^{-1}$ .

HRMS (ESI)  $m/z$  calcd for  $\text{C}_{16}\text{H}_{18}\text{Br}_2\text{NO}_7\text{S}$   $[\text{M}+\text{H}]^+$ : 525.9171, found 525.9164.

**diethyl-2-(2-(fluorosulfonyl)-1-(4-methoxyphenyl)ethyl)-2-((2-hydroxybenzylidene)amino)malonate (3h-I)**

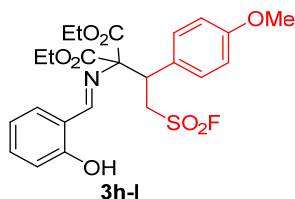

White solid, 39.6 mg, 40% yield, m.p. 160.7 – 161.2 °C.

**<sup>1</sup>H NMR** (400 MHz, Chloroform-*d*) δ 12.43 (s, 1H), 8.49 (s, 1H), 7.47 – 7.22 (m, 2H), 7.19 – 7.11 (m, 2H), 6.99 – 6.83 (m, 2H), 6.82 – 6.68 (m, 2H), 4.35 – 4.13 (m, 4H), 4.08 – 3.86 (m, 3H), 3.69 (s, 3H), 1.24 (t, *J* = 7.2 Hz, 3H), 1.12 (t, *J* = 7.2 Hz, 3H).

**<sup>13</sup>C NMR** (100 MHz, Chloroform-*d*) δ 171.2, 167.3, 166.4, 161.1, 159.9, 134.3, 133.3, 130.5, 126.6, 119.5, 118.8, 117.5, 114.3, 63.4, 62.9, 55.3, 45.7, 14.1, 14.0.

**<sup>19</sup>F NMR** (376 MHz, Chloroform-*d*) δ 59.89.

**HRMS** (ESI) *m/z* calcd for C<sub>23</sub>H<sub>27</sub>FNO<sub>8</sub>S [M+H]<sup>+</sup>: 496.1436, found 496.1440.

**ethyl - 2 - ( hydroxymethyl ) - 3 - phenyl - 2, 3, 3a, 9b - tetrahydro - 1H - benzo [ 5,6 ] [ 1,2 ] oxathiino [ 4,3 - b ] pyrrole - 2 - carboxylate 4,4 - dioxide ( 4a )**

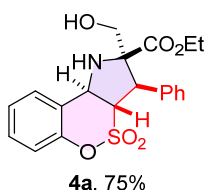

White solid, 60.5 mg, 75% yield, m.p. 183.4 – 183.9 °C.

**<sup>1</sup>H NMR** (400 MHz, Chloroform-*d*) δ 7.53 – 7.48 (m, 1H), 7.38 – 7.31 (m, 1H), 7.30 – 7.22 (m, 4H), 7.15 – 7.10 (m, 2H), 7.08 (d, *J* = 8.0 Hz, 1H), 4.53 (d, *J* = 9.6 Hz, 1H), 4.02 (d, *J* = 11.2 Hz, 1H), 3.79 – 3.70 (m, 4H), 3.52 – 3.23 (m, 2H), 2.61 (s, 1H), 1.54 (s, 1H), 0.67 (t, *J* = 7.2 Hz, 3H).

**<sup>13</sup>C NMR** (100 MHz, Chloroform-*d*) δ 171.6, 150.8, 134.3, 130.3, 129.0, 128.6, 127.9, 125.9, 125.8, 123.6, 118.3, 65.3, 65.2, 62.6, 60.3, 52.6, 13.4.

**HRMS** (ESI) *m/z* calcd for C<sub>20</sub>H<sub>22</sub>NO<sub>6</sub>S [M+H]<sup>+</sup>: 404.1162, found 404.1168.

**diethyl 3-phenyl- 2H- benzo [ 5,6 ] [ 1,2 ] oxathiino [ 4,3 - b ] pyrrole - 2, 2 - dicarboxylate 4,4 - dioxide ( 5w )**

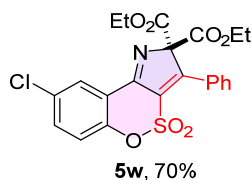

Red solid, 61.7 mg, 70% yield, m.p. 163.3 – 163.8 °C.

**<sup>1</sup>H NMR** (400 MHz, Chloroform-*d*) δ 7.90 (d, *J* = 2.2 Hz, 1H), 7.57 (dd, *J* = 8.8, 2.2 Hz, 1H), 7.51 – 7.46 (m, 2H), 7.45 – 7.36 (m, 3H), 7.28 – 7.24 (m, 1H), 4.63 (q, *J* = 7.2 Hz, 2H), 4.16 (q, *J* = 7.2 Hz, 2H), 1.50 (t, *J* = 7.2 Hz, 3H), 1.05 (t, *J* = 7.2 Hz, 3H).



$^{13}\text{C}$  NMR (100 MHz, Chloroform-*d*)  $\delta$  159.8, 150.4, 148.5, 134.0, 130.1, 129.4, 129.1, 129.0, 128.2, 128.0, 127.2, 123.6, 121.9, 119.3, 119.1, 116.7, 67.3, 62.0, 13.8, 13.7.

HRMS (ESI)  $m/z$  calcd for  $\text{C}_{22}\text{H}_{20}\text{NO}_7\text{S}$   $[\text{M}+\text{H}]^+$ : 442.0955, found 442.0958.

**3-(4-methoxyphenyl)-2-(4-nitrophenyl)-2,3,3a,9b-tetrahydro-1H-benzo[5,6][1,2]oxathiino[4,3-*b*]pyrrole 4,4-dioxide (9a)**

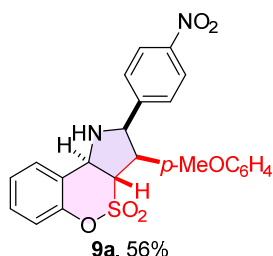

White solid, 50.7 mg, 90% yield, m.p. 235.2 – 235.8 °C.

$^1\text{H}$  NMR (400 MHz, Chloroform-*d*)  $\delta$  7.95 – 7.87 (m, 2H), 7.54 – 7.49 (m, 1H), 7.46 – 7.39 (m, 1H), 7.39 – 7.31 (m, 1H), 7.19 (d,  $J = 8.8$  Hz, 3H), 6.73 (d,  $J = 8.4$  Hz, 2H), 6.58 (d,  $J = 8.8$  Hz, 2H), 5.16 (d,  $J = 9.6$  Hz, 1H), 4.97 (d,  $J = 11.2$  Hz, 1H), 4.41 (dd,  $J = 11.6, 10.0$  Hz, 1H), 3.75 (t,  $J = 11.6$  Hz, 1H), 3.67 (s, 3H), 2.96 (s, 1H).

$^{13}\text{C}$  NMR (100 MHz, Chloroform-*d*)  $\delta$  159.2, 150.7, 148.1, 147.0, 129.7, 129.6, 128.8, 127.3, 126.1, 126.0, 124.9, 122.9, 118.3, 114.0, 64.7, 63.6, 59.1, 55.2, 49.7.

IR (KBr, thin film): 3612, 2820, 1734, 1653, 1541, 1344, 1254, 1156, 1031, 756  $\text{cm}^{-1}$ .

HRMS (ESI)  $m/z$  calcd for  $\text{C}_{23}\text{H}_{21}\text{N}_2\text{O}_6\text{S}$   $[\text{M}+\text{H}]^+$ : 453.1115, found 453.1112.

**4-bromo-2-formylphenyl-2-phenylethene-1-sulfonate (12a)**(known compound)<sup>6</sup>

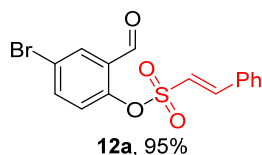

White solid, 69.7 mg, 95% yield.

$^1\text{H}$  NMR (400 MHz, Chloroform-*d*)  $\delta$  10.26 (s, 1H), 8.03 (d,  $J = 2.8$  Hz, 1H), 7.72 (dd,  $J = 8.4, 2.4$  Hz, 1H), 7.60 (d,  $J = 15.6$  Hz, 1H), 7.53 – 7.47 (m, 3H), 7.47 – 7.41 (m, 2H), 7.30 (d,  $J = 8.8$  Hz, 1H), 6.93 (d,  $J = 15.6$  Hz, 1H).

$^{13}\text{C}$  NMR (100 MHz, Chloroform-*d*)  $\delta$  186.6, 149.6, 148.1, 138.2, 132.5, 132.2, 131.2, 130.7, 129.5, 129.0, 125.7, 121.5, 119.5.

**6-bromo-2H-chromene (13a)** (known compound)<sup>7</sup>

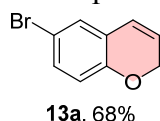

Colorless liquid, 28.7 mg, 68% yield.

$^1\text{H}$  NMR (400 MHz, Chloroform-*d*)  $\delta$  7.17 (dd,  $J = 8.6, 2.2$  Hz, 1H), 7.06 (d,  $J = 2.4$  Hz, 1H), 6.64 (d,  $J = 8.8$  Hz, 1H), 6.34 (d,  $J = 9.6$  Hz, 1H), 5.80 (dt,  $J = 9.8, 3.4$  Hz, 1H), 4.81 (s, 2H).

$^{13}\text{C}$  NMR (100 MHz, Chloroform-*d*)  $\delta$  153.2, 131.7, 129.1, 124.3, 123.7, 123.3, 117.6, 113.4, 65.8.

#### 4. Single-crystal X-ray structure analysis.

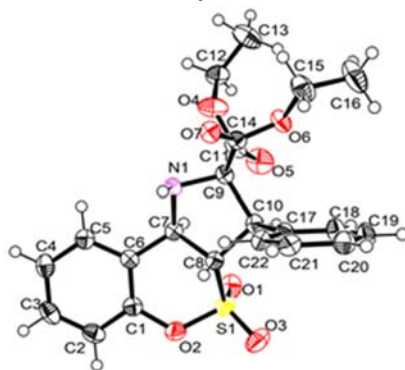

**Figure S1.** Crystal structure of **3a** at 30% probability level.

**Table S1.** Crystal data and structure refinement for **3a**.

| Identification code             | <b>3a</b>                                         |                   |
|---------------------------------|---------------------------------------------------|-------------------|
| Empirical formula               | C <sub>22</sub> H <sub>23</sub> NO <sub>7</sub> S |                   |
| Formula weight                  | 445.47                                            |                   |
| Temperature                     | 173.15 K                                          |                   |
| Wavelength                      | 1.54178 Å                                         |                   |
| Crystal system                  | Triclinic                                         |                   |
| Space group                     | P-1                                               |                   |
| Unit cell dimensions            | a = 9.6166(3) Å                                   | α = 73.3600(10)°. |
|                                 | b = 10.0879(3) Å                                  | β = 77.3780(10)°. |
|                                 | c = 11.7837(4) Å                                  | γ = 84.3940(10)°. |
| Volume                          | 1068.06(6) Å <sup>3</sup>                         |                   |
| Z                               | 2                                                 |                   |
| Density (calculated)            | 1.385 Mg/m <sup>3</sup>                           |                   |
| Absorption coefficient          | 1.735 mm <sup>-1</sup>                            |                   |
| F(000)                          | 468                                               |                   |
| Crystal size                    | 0.25 x 0.23 x 0.21 mm <sup>3</sup>                |                   |
| Theta range for data collection | 4.578 to 72.225°.                                 |                   |
| Index ranges                    | -10 ≤ h ≤ 11, -12 ≤ k ≤ 12, -14 ≤ l ≤ 14          |                   |
| Reflections collected           | 25182                                             |                   |
| Independent reflections         | 4164 [R(int) = 0.0298]                            |                   |
| Completeness to theta = 67.679° | 99.1 %                                            |                   |
| Absorption correction           | Semi-empirical from equivalents                   |                   |
| Max. and min. transmission      | 0.7536 and 0.6429                                 |                   |
| Refinement method               | Full-matrix least-squares on F <sup>2</sup>       |                   |
| Data / restraints / parameters  | 4164 / 10 / 305                                   |                   |

|                                      |                                    |
|--------------------------------------|------------------------------------|
| Goodness-of-fit on $F^2$             | 1.064                              |
| Final R indices [ $I > 2\sigma(I)$ ] | R1 = 0.0356, wR2 = 0.0893          |
| R indices (all data)                 | R1 = 0.0365, wR2 = 0.0899          |
| Extinction coefficient               | n/a                                |
| Largest diff. peak and hole          | 0.363 and -0.437 e.Å <sup>-3</sup> |

---

The CCDC number of product **3a** is 2218888.

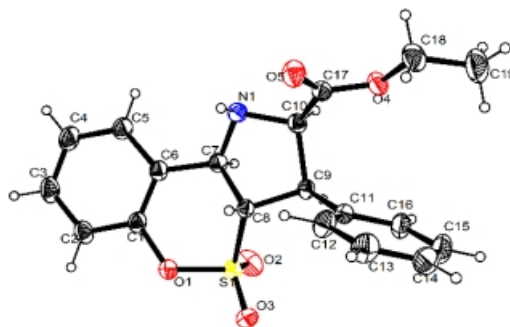

**Figure S23.** Crystal structure of **3af** at 30% probability level.

**Table S2.** Crystal data and structure refinement for **3af**.

| Identification code               | <b>3af</b>                                        |                    |
|-----------------------------------|---------------------------------------------------|--------------------|
| Empirical formula                 | C <sub>19</sub> H <sub>19</sub> NO <sub>5</sub> S |                    |
| Formula weight                    | 373.41                                            |                    |
| Temperature                       | 298.0 K                                           |                    |
| Wavelength                        | 0.71073 Å                                         |                    |
| Crystal system                    | Monoclinic                                        |                    |
| Space group                       | C 1 2/c 1                                         |                    |
| Unit cell dimensions              | a = 12.3087(3) Å                                  | α = 90°.           |
|                                   | b = 18.9005(5) Å                                  | β = 102.4740(10)°. |
|                                   | c = 16.1113(4) Å                                  | γ = 90°.           |
| Volume                            | 3659.66(16) Å <sup>3</sup>                        |                    |
| Z                                 | 8                                                 |                    |
| Density (calculated)              | 1.355 Mg/m <sup>3</sup>                           |                    |
| Absorption coefficient            | 0.206 mm <sup>-1</sup>                            |                    |
| F(000)                            | 1568                                              |                    |
| Crystal size                      | 0.25 x 0.23 x 0.22 mm <sup>3</sup>                |                    |
| Theta range for data collection   | 2.514 to 26.737°.                                 |                    |
| Index ranges                      | -15 ≤ h ≤ 15, -23 ≤ k ≤ 23, -20 ≤ l ≤ 20          |                    |
| Reflections collected             | 22145                                             |                    |
| Independent reflections           | 3884 [R(int) = 0.0375]                            |                    |
| Completeness to theta = 25.242°   | 99.6 %                                            |                    |
| Absorption correction             | Semi-empirical from equivalents                   |                    |
| Max. and min. transmission        | 0.7454 and 0.6685                                 |                    |
| Refinement method                 | Full-matrix least-squares on F <sup>2</sup>       |                    |
| Data / restraints / parameters    | 3884 / 7 / 227                                    |                    |
| Goodness-of-fit on F <sup>2</sup> | 1.047                                             |                    |
| Final R indices [I > 2σ(I)]       | R1 = 0.0453, wR2 = 0.1182                         |                    |
| R indices (all data)              | R1 = 0.0572, wR2 = 0.1279                         |                    |

|                             |                                    |
|-----------------------------|------------------------------------|
| Extinction coefficient      | n/a                                |
| Largest diff. peak and hole | 0.358 and -0.248 e.Å <sup>-3</sup> |

---

The CCDC number of product **3af** is 2347754.

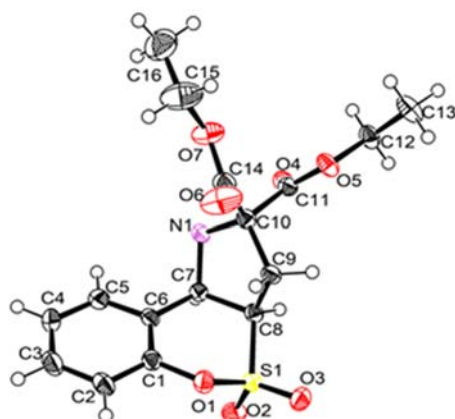

**Figure S3.** Crystal structure of **3am** at 30% probability level.

**Table S3.** Crystal data and structure refinement for **3am**.

| Identification code               | <b>3am</b>                                        |                   |
|-----------------------------------|---------------------------------------------------|-------------------|
| Empirical formula                 | C <sub>16</sub> H <sub>18</sub> NO <sub>7</sub> S |                   |
| Formula weight                    | 368.37                                            |                   |
| Temperature                       | 173.0 K                                           |                   |
| Wavelength                        | 0.71073 Å                                         |                   |
| Crystal system                    | Monoclinic                                        |                   |
| Space group                       | P 1 2 1 1                                         |                   |
| Unit cell dimensions              | a = 6.9700(2) Å                                   | α = 90°.          |
|                                   | b = 20.0713(4) Å                                  | β = 91.7350(10)°. |
|                                   | c = 12.4232(3) Å                                  | γ = 90°.          |
| Volume                            | 1737.17(7) Å <sup>3</sup>                         |                   |
| Z                                 | 4                                                 |                   |
| Density (calculated)              | 1.408 Mg/m <sup>3</sup>                           |                   |
| Absorption coefficient            | 0.224 mm <sup>-1</sup>                            |                   |
| F(000)                            | 772                                               |                   |
| Crystal size                      | 0.24 x 0.17 x 0.11 mm <sup>3</sup>                |                   |
| Theta range for data collection   | 2.610 to 26.748°.                                 |                   |
| Index ranges                      | -8 ≤ h ≤ 7, -25 ≤ k ≤ 25, -15 ≤ l ≤ 15            |                   |
| Reflections collected             | 21863                                             |                   |
| Independent reflections           | 7359 [R(int) = 0.0336]                            |                   |
| Completeness to theta = 25.242°   | 99.8 %                                            |                   |
| Absorption correction             | Semi-empirical from equivalents                   |                   |
| Max. and min. transmission        | 0.7454 and 0.6809                                 |                   |
| Refinement method                 | Full-matrix least-squares on F <sup>2</sup>       |                   |
| Data / restraints / parameters    | 7359 / 1 / 456                                    |                   |
| Goodness-of-fit on F <sup>2</sup> | 1.027                                             |                   |

|                                      |                                       |
|--------------------------------------|---------------------------------------|
| Final R indices [ $I > 2\sigma(I)$ ] | R1 = 0.0372, wR2 = 0.0913             |
| R indices (all data)                 | R1 = 0.0413, wR2 = 0.0956             |
| Absolute structure parameter         | 0.49(8)                               |
| Extinction coefficient               | n/a                                   |
| Largest diff. peak and hole          | 0.507 and -0.377 e. $\text{\AA}^{-3}$ |

---

The CCDC number of product **3am** is 2218887.



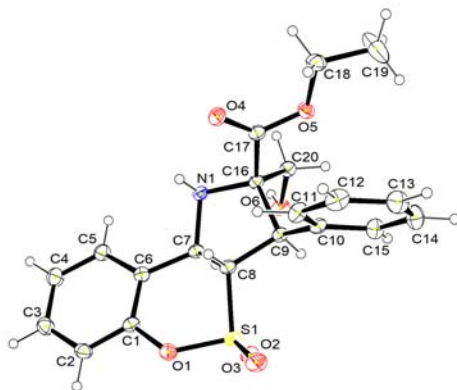

**Figure S4.** Crystal structure of **4a** at 30% probability level.

**Table S4.** Crystal data and structure refinement for **4a**.

| Identification code               | <b>4a</b>                                         |                    |
|-----------------------------------|---------------------------------------------------|--------------------|
| Empirical formula                 | C <sub>20</sub> H <sub>21</sub> NO <sub>6</sub> S |                    |
| Formula weight                    | 403.44                                            |                    |
| Temperature                       | 173.0 K                                           |                    |
| Wavelength                        | 1.54178 Å                                         |                    |
| Crystal system                    | Monoclinic                                        |                    |
| Space group                       | P 1 21/n 1                                        |                    |
| Unit cell dimensions              | a = 10.0053(2) Å                                  | α = 90°.           |
|                                   | b = 13.4636(3) Å                                  | β = 107.2020(10)°. |
|                                   | c = 15.1329(3) Å                                  | γ = 90°.           |
| Volume                            | 1947.33(7) Å <sup>3</sup>                         |                    |
| Z                                 | 4                                                 |                    |
| Density (calculated)              | 1.376 Mg/m <sup>3</sup>                           |                    |
| Absorption coefficient            | 1.803 mm <sup>-1</sup>                            |                    |
| F(000)                            | 848                                               |                    |
| Crystal size                      | 0.17 x 0.16 x 0.14 mm <sup>3</sup>                |                    |
| Theta range for data collection   | 4.488 to 72.138°.                                 |                    |
| Index ranges                      | -12 ≤ h ≤ 12, -15 ≤ k ≤ 16, -15 ≤ l ≤ 18          |                    |
| Reflections collected             | 14602                                             |                    |
| Independent reflections           | 3807 [R(int) = 0.0457]                            |                    |
| Completeness to theta = 67.679°   | 99.5 %                                            |                    |
| Absorption correction             | Semi-empirical from equivalents                   |                    |
| Max. and min. transmission        | 0.7536 and 0.6674                                 |                    |
| Refinement method                 | Full-matrix least-squares on F <sup>2</sup>       |                    |
| Data / restraints / parameters    | 3807 / 0 / 258                                    |                    |
| Goodness-of-fit on F <sup>2</sup> | 1.036                                             |                    |

|                               |                                    |
|-------------------------------|------------------------------------|
| Final R indices [I>2sigma(I)] | R1 = 0.0418, wR2 = 0.0968          |
| R indices (all data)          | R1 = 0.0552, wR2 = 0.1051          |
| Extinction coefficient        | n/a                                |
| Largest diff. peak and hole   | 0.272 and -0.437 e.Å <sup>-3</sup> |

---

The CCDC number of product **4a** is 2378446.

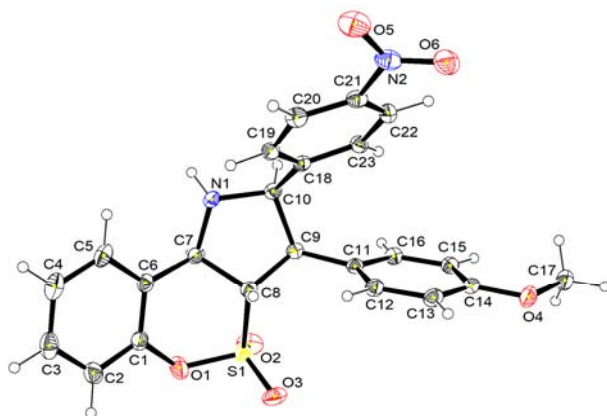

**Figure S5.** Crystal structure of **9a** at 30% probability level.

**Table S5.** Crystal data and structure refinement for **9a**.

| Identification code               | <b>9a</b>                                                       |                                          |
|-----------------------------------|-----------------------------------------------------------------|------------------------------------------|
| Empirical formula                 | C <sub>23</sub> H <sub>20</sub> N <sub>2</sub> O <sub>6</sub> S |                                          |
| Formula weight                    | 452.47                                                          |                                          |
| Temperature                       | 173.0 K                                                         |                                          |
| Wavelength                        | 1.54178 Å                                                       |                                          |
| Crystal system                    | Monoclinic                                                      |                                          |
| Space group                       | P 1 21/c 1                                                      |                                          |
| Unit cell dimensions              | a = 7.3391(6) Å<br>b = 27.293(2) Å<br>c = 10.5772(9) Å          | α = 90°.<br>β = 105.174(3)°.<br>γ = 90°. |
| Volume                            | 2044.8(3) Å <sup>3</sup>                                        |                                          |
| Z                                 | 4                                                               |                                          |
| Density (calculated)              | 1.470 Mg/m <sup>3</sup>                                         |                                          |
| Absorption coefficient            | 1.804 mm <sup>-1</sup>                                          |                                          |
| F(000)                            | 944                                                             |                                          |
| Crystal size                      | 0.22 x 0.21 x 0.2 mm <sup>3</sup>                               |                                          |
| Theta range for data collection   | 4.624 to 71.984°.                                               |                                          |
| Index ranges                      | -9 ≤ h ≤ 8, -33 ≤ k ≤ 31, -12 ≤ l ≤ 13                          |                                          |
| Reflections collected             | 15630                                                           |                                          |
| Independent reflections           | 3926 [R(int) = 0.0434]                                          |                                          |
| Completeness to theta = 67.679°   | 99.4 %                                                          |                                          |
| Absorption correction             | Semi-empirical from equivalents                                 |                                          |
| Max. and min. transmission        | 0.7536 and 0.6662                                               |                                          |
| Refinement method                 | Full-matrix least-squares on F <sup>2</sup>                     |                                          |
| Data / restraints / parameters    | 3926 / 1 / 293                                                  |                                          |
| Goodness-of-fit on F <sup>2</sup> | 1.044                                                           |                                          |

|                               |                                    |
|-------------------------------|------------------------------------|
| Final R indices [I>2sigma(I)] | R1 = 0.0421, wR2 = 0.0988          |
| R indices (all data)          | R1 = 0.0515, wR2 = 0.1053          |
| Extinction coefficient        | n/a                                |
| Largest diff. peak and hole   | 0.516 and -0.384 e.Å <sup>-3</sup> |

---

The CCDC number of product **9a** is 2353272.

## 5. Computational details

We performed the DFT calculation on the template reaction and the structures **1a**, **2a**, **2am**, **3a** and **3am** are not simplified. All theoretical calculations were performed with Gaussian 16<sup>9</sup>. All structures were completely optimized by using the M062X-D3<sup>10</sup> method and the def2-SVP<sup>11</sup> basis set in solvent of MeCN, which employs the integral equation formalism polarizable continuum model (IEFPCM)<sup>12</sup>. Frequency calculations were carried out at the same level to confirm all the optimized structures as minima (no imaginary frequency) or transition states (only one imaginary frequency), and provided the thermal relative Gibbs free energy correction. For all transition states (TSs), intrinsic reaction coordinate (IRC)<sup>13</sup> calculations were employed to verify the TS led to its relevant intermediates. The single-point energies (SPE) by using a higher computational level of the M062X-D3 method and the ma-def2-TZVPP basis set in solvent of MeCN, which employs the integral equation formalism polarizable continuum model (SMD)<sup>14</sup>. All thermodynamic data were corrected by Shermo<sup>15</sup> software at 298.15 K, 1.0 atm. Images of the 3D structures of molecules were generated using CYLview<sup>16</sup>.

Figure S6. Potential energy surfaces of TS1 and TS2

1. Micheal addition of 3a

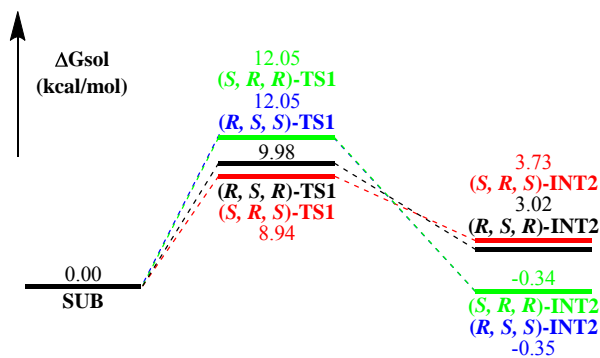

2. Mannich reaction of 3a

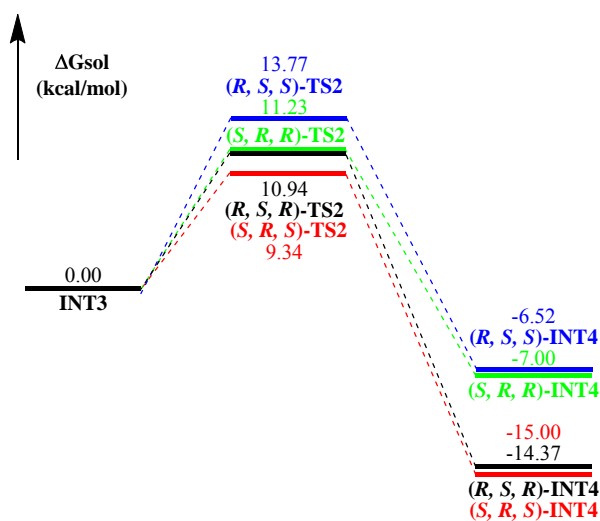

3. Mannich reaction of 3am

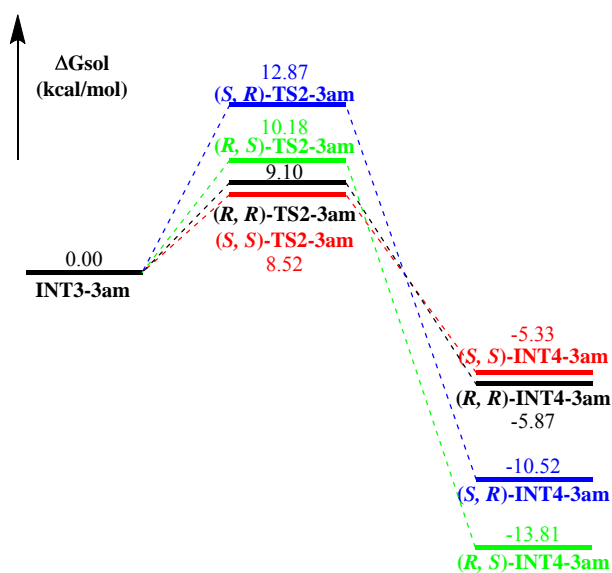

**Table S6.** Configuration of TS1, TS2 and TS2-3am

|                                                                                   |                                                                                   |                                                                                   |                                                                                     |
|-----------------------------------------------------------------------------------|-----------------------------------------------------------------------------------|-----------------------------------------------------------------------------------|-------------------------------------------------------------------------------------|
| 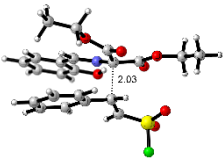 |  |  |  |
| <b>(R, S, S)-TS1</b>                                                              | <b>(S, R, S)-TS1</b>                                                              | <b>(S, R, R)-TS1</b>                                                              | <b>(R, S, R)-TS1</b>                                                                |
|  |  |  |  |
| <b>(R, S, S)-TS2</b>                                                              | <b>(S, R, S)-TS2</b>                                                              | <b>(S, R, R)-TS2</b>                                                              | <b>(R, S, R)-TS2</b>                                                                |
|  |  |  |  |
| <b>(S, S)-TS2-3am</b>                                                             | <b>(R, S)-TS2-3am</b>                                                             | <b>(R, R)-TS2-3am</b>                                                             | <b>(S, R)-TS2-3am</b>                                                               |

**Figure S7.** DFT calculations for the (*R, S, R*) reaction pathway, and the free energy profile obtained at SMD<sub>(MeCN)</sub>/M062X-D3/ma-def2-TZVPP//def2-SVP level

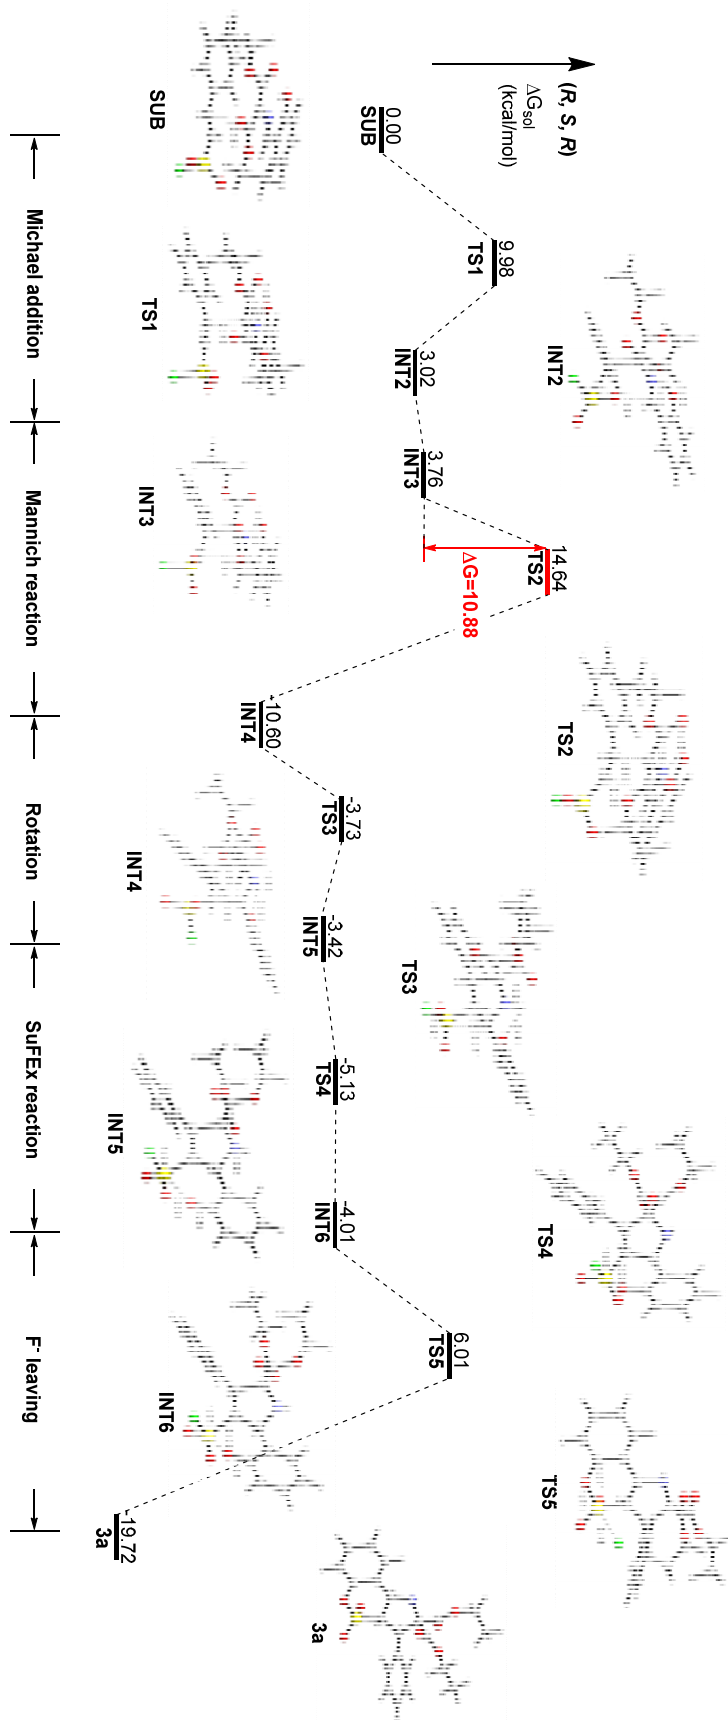



1a-

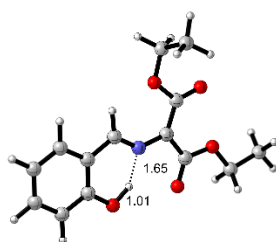

Charge = -1 Multiplicity = 1

|   |          |          |          |
|---|----------|----------|----------|
| C | -2.99385 | -1.19949 | 0.07683  |
| C | -4.32589 | -1.63358 | 0.14256  |
| H | -4.50836 | -2.70464 | 0.24636  |
| C | -5.37835 | -0.72359 | 0.07673  |
| H | -6.40657 | -1.08638 | 0.12998  |
| C | -5.12169 | 0.64404  | -0.05642 |
| H | -5.94303 | 1.35971  | -0.10826 |
| C | -3.80125 | 1.08202  | -0.12149 |
| H | -3.58277 | 2.14843  | -0.22508 |
| C | -2.7206  | 0.19004  | -0.05792 |
| C | -1.34287 | 0.69162  | -0.12947 |
| H | -1.21207 | 1.77516  | -0.23172 |
| C | 1.00224  | -0.02239 | -0.10488 |
| C | 1.7378   | 1.21936  | -0.22675 |
| C | 1.49807  | 3.57775  | -0.41583 |
| H | 0.72379  | 4.22317  | -0.85147 |
| C | 1.94226  | 4.10315  | 0.93653  |
| H | 2.33763  | 5.12379  | 0.83695  |
| H | 2.73051  | 3.46127  | 1.35082  |
| C | 1.65521  | -1.31876 | -0.00073 |
| C | 3.6533   | -2.55749 | 0.07581  |
| H | 3.31941  | -3.2154  | -0.74122 |
| H | 3.35994  | -3.04577 | 1.01802  |
| C | 5.1442   | -2.31198 | 0.01842  |
| H | 5.68911  | -3.26225 | 0.09606  |
| H | 5.46007  | -1.6599  | 0.84438  |
| H | 5.4191   | -1.82814 | -0.92897 |
| N | -0.36325 | -0.14146 | -0.07001 |
| O | -2.01184 | -2.10098 | 0.14224  |
| O | 0.8971   | 2.29319  | -0.31145 |
| O | 2.9446   | 1.38872  | -0.26168 |
| O | 3.00441  | -1.29841 | -0.03089 |
| O | 1.06056  | -2.383   | 0.10783  |
| H | 2.34778  | 3.52807  | -1.11018 |
| H | 1.09581  | 4.12585  | 1.63734  |
| H | -1.13772 | -1.59316 | 0.07821  |

2a

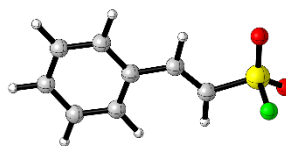

Charge = 0 Multiplicity = 1

|   |          |          |          |
|---|----------|----------|----------|
| C | -3.42811 | -1.32454 | 0.00655  |
| C | -4.29008 | -0.22321 | 0.02094  |
| C | -3.77094 | 1.07083  | 0.01415  |
| C | -2.39139 | 1.26422  | -0.00682 |
| C | -1.51825 | 0.16619  | -0.02099 |
| C | -2.05181 | -1.13385 | -0.01449 |
| C | -0.07705 | 0.42709  | -0.04067 |
| C | 0.89474  | -0.49551 | -0.06098 |
| S | 2.54948  | 0.02714  | -0.1257  |
| O | 2.65902  | 1.46246  | -0.1613  |
| O | 3.31376  | -0.80734 | -1.01409 |
| F | 3.02664  | -0.3971  | 1.34506  |
| H | -3.83467 | -2.33642 | 0.01168  |
| H | -5.36983 | -0.37802 | 0.03736  |
| H | -4.44063 | 1.93138  | 0.02502  |
| H | -1.98041 | 2.27558  | -0.01211 |
| H | -1.39026 | -2.0013  | -0.02604 |
| H | 0.22356  | 1.47963  | -0.04087 |
| H | 0.77587  | -1.57941 | -0.0724  |

(R, S, S)-INT1

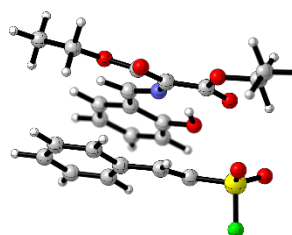

Charge = -1 Multiplicity = 1

|   |          |          |          |
|---|----------|----------|----------|
| C | -1.91525 | -2.25846 | -1.36681 |
| C | -2.70166 | -3.41773 | -1.42623 |
| H | -2.19151 | -4.37611 | -1.53726 |
| C | -4.09018 | -3.34256 | -1.34336 |
| H | -4.68186 | -4.25853 | -1.3932  |
| C | -4.72288 | -2.10454 | -1.19585 |
| H | -5.80966 | -2.0427  | -1.12825 |
| C | -3.94642 | -0.95027 | -1.13202 |
| H | -4.42299 | 0.02553  | -1.00259 |
| C | -2.5476  | -0.99453 | -1.21736 |

|   |          |          |          |                                                                                    |          |          |          |
|---|----------|----------|----------|------------------------------------------------------------------------------------|----------|----------|----------|
| C | -1.76091 | 0.23583  | -1.08713 | H                                                                                  | 0.35846  | -2.3082  | 0.88282  |
| H | -2.30769 | 1.15727  | -0.85126 |                                                                                    |          |          |          |
| C | 0.52605  | 1.09292  | -1.0447  | <b>(R, S, S)-TS1</b>                                                               |          |          |          |
| C | 0.34812  | 2.47418  | -0.63909 | 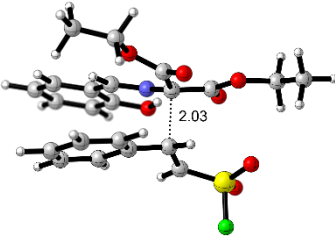 |          |          |          |
| C | -1.2648  | 4.16096  | -0.25295 | Charge = -1 Multiplicity = 1                                                       |          |          |          |
| H | -0.70421 | 4.90653  | -0.83751 | Imaginary frequency = -367.7035 cm <sup>-1</sup>                                   |          |          |          |
| C | -2.75859 | 4.35216  | -0.389   | C                                                                                  | -2.33123 | -2.54586 | -0.97105 |
| H | -3.04854 | 5.35243  | -0.04039 | C                                                                                  | -3.26314 | -3.59672 | -0.94909 |
| H | -3.2979  | 3.60239  | 0.20778  | H                                                                                  | -2.88729 | -4.61636 | -1.04525 |
| C | 1.83133  | 0.5111   | -1.29335 | C                                                                                  | -4.62116 | -3.33654 | -0.80653 |
| C | 4.14662  | 0.8248   | -1.5905  | H                                                                                  | -5.32597 | -4.17002 | -0.79313 |
| H | 4.14751  | 0.57758  | -2.66481 | C                                                                                  | -5.09048 | -2.02322 | -0.67829 |
| H | 4.31853  | -0.10477 | -1.03431 | H                                                                                  | -6.15617 | -1.82469 | -0.56306 |
| C | 5.18779  | 1.87075  | -1.26263 | C                                                                                  | -4.17576 | -0.97735 | -0.69742 |
| H | 6.1881   | 1.51135  | -1.53902 | H                                                                                  | -4.51639 | 0.05629  | -0.59239 |
| H | 5.18093  | 2.08852  | -0.18537 | C                                                                                  | -2.80027 | -1.21041 | -0.84753 |
| H | 4.98941  | 2.80461  | -1.80671 | C                                                                                  | -1.86125 | -0.08653 | -0.82369 |
| N | -0.48085 | 0.17926  | -1.21002 | H                                                                                  | -2.28015 | 0.91053  | -0.64126 |
| O | -0.58393 | -2.37034 | -1.43609 | C                                                                                  | 0.49298  | 0.52524  | -0.86355 |
| O | -0.95307 | 2.85828  | -0.7215  | C                                                                                  | 0.41615  | 2.00925  | -0.98571 |
| O | 1.18937  | 3.2604   | -0.23817 | C                                                                                  | -1.04822 | 3.8516   | -1.19785 |
| O | 2.87576  | 1.35996  | -1.23598 | H                                                                                  | -0.56811 | 4.31029  | -2.07533 |
| O | 2.0078   | -0.67329 | -1.55839 | C                                                                                  | -2.54168 | 4.07813  | -1.18257 |
| H | -0.93439 | 4.26279  | 0.79339  | H                                                                                  | -2.75823 | 5.15457  | -1.18236 |
| H | -3.06622 | 4.2457   | -1.43859 | H                                                                                  | -2.98491 | 3.63251  | -0.28015 |
| H | -0.20434 | -1.42803 | -1.40425 | C                                                                                  | 1.69426  | -0.15883 | -1.43094 |
| C | -2.98754 | -0.17827 | 2.23701  | C                                                                                  | 3.92668  | -0.00944 | -2.13455 |
| C | -3.1692  | 1.18814  | 2.46299  | H                                                                                  | 3.75829  | -0.36373 | -3.16368 |
| C | -2.07267 | 2.05172  | 2.43351  | H                                                                                  | 4.12404  | -0.87875 | -1.49631 |
| C | -0.79901 | 1.55128  | 2.17468  | C                                                                                  | 5.04454  | 1.00321  | -2.06075 |
| C | -0.60845 | 0.18202  | 1.93773  | H                                                                                  | 5.97757  | 0.56234  | -2.43608 |
| C | -1.7162  | -0.67835 | 1.97476  | H                                                                                  | 5.19901  | 1.31509  | -1.01878 |
| C | 0.74447  | -0.30088 | 1.64793  | H                                                                                  | 4.81077  | 1.89171  | -2.66334 |
| C | 1.05083  | -1.52281 | 1.18728  | N                                                                                  | -0.61162 | -0.31018 | -1.0024  |
| S | 2.7202   | -1.94967 | 1.00331  | O                                                                                  | -1.03648 | -2.82814 | -1.09979 |
| O | 3.5905   | -0.80268 | 1.1126   | O                                                                                  | -0.82607 | 2.44043  | -1.23502 |
| O | 2.92823  | -2.9788  | 0.02037  | O                                                                                  | 1.3356   | 2.7736   | -0.80596 |
| F | 2.93671  | -2.72353 | 2.40692  | O                                                                                  | 2.73612  | 0.63089  | -1.6704  |
| H | -3.8419  | -0.85622 | 2.25822  | O                                                                                  | 1.72732  | -1.35747 | -1.60696 |
| H | -4.16694 | 1.57998  | 2.66758  |                                                                                    |          |          |          |
| H | -2.21217 | 3.11895  | 2.61424  |                                                                                    |          |          |          |
| H | 0.06115  | 2.22456  | 2.13487  |                                                                                    |          |          |          |
| H | -1.585   | -1.74786 | 1.79817  |                                                                                    |          |          |          |
| H | 1.56321  | 0.40296  | 1.82918  |                                                                                    |          |          |          |

|   |          |          |          |   |          |          |          |
|---|----------|----------|----------|---|----------|----------|----------|
| H | -0.56379 | 4.2633   | -0.30079 | C | 0.30697  | 1.80408  | 1.12384  |
| H | -3.01328 | 3.62747  | -2.06663 | C | -0.36838 | 4.00862  | 1.60653  |
| H | -0.53636 | -1.94806 | -1.11329 | H | 0.6468   | 4.28015  | 1.92931  |
| C | -2.57083 | 0.88456  | 2.54704  | C | -1.06831 | 5.14568  | 0.90381  |
| C | -2.57568 | 2.26823  | 2.71884  | H | -1.15714 | 6.00258  | 1.58393  |
| C | -1.43547 | 3.00716  | 2.39327  | H | -2.07617 | 4.84397  | 0.58866  |
| C | -0.30765 | 2.36647  | 1.88627  | C | 1.34857  | 1.25252  | -1.04932 |
| C | -0.29511 | 0.97558  | 1.69034  | C | 3.62913  | 1.71676  | -1.35585 |
| C | -1.43959 | 0.24379  | 2.04093  | H | 3.41028  | 2.52715  | -2.06568 |
| C | 0.90736  | 0.31757  | 1.11093  | H | 3.74008  | 0.77954  | -1.92415 |
| C | 1.16137  | -1.04189 | 1.41386  | C | 4.84213  | 2.00162  | -0.50588 |
| S | 2.70883  | -1.6304  | 1.38634  | H | 5.72154  | 2.14066  | -1.14862 |
| O | 3.66868  | -0.69358 | 0.81598  | H | 5.01899  | 1.15222  | 0.16574  |
| O | 2.80413  | -3.04665 | 1.07959  | H | 4.69573  | 2.91532  | 0.08653  |
| F | 3.18731  | -1.63522 | 2.9678   | N | -0.89473 | 0.49642  | -0.63597 |
| H | -3.45252 | 0.29601  | 2.80615  | O | -2.08967 | -0.63789 | -2.59473 |
| H | -3.46021 | 2.76961  | 3.1147   | O | -0.27197 | 2.9147   | 0.68105  |
| H | -1.42369 | 4.08899  | 2.53797  | O | 0.75398  | 1.67756  | 2.23163  |
| H | 0.58067  | 2.94638  | 1.62892  | O | 2.50706  | 1.55394  | -0.47831 |
| H | -1.4533  | -0.83974 | 1.91601  | O | 1.11501  | 1.35122  | -2.22161 |
| H | 1.78898  | 0.96658  | 1.07106  | H | -0.92052 | 3.66521  | 2.49311  |
| H | 0.40571  | -1.79233 | 1.63092  | H | -0.50129 | 5.46039  | 0.01763  |

**(R, S, S)-INT2**

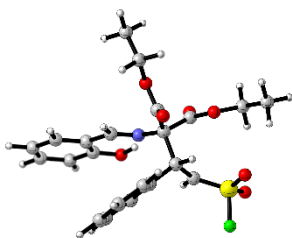

Charge = -1 Multiplicity = 1

|   |          |          |          |   |          |          |          |
|---|----------|----------|----------|---|----------|----------|----------|
| C | -3.22773 | -0.4491  | -1.92919 | S | 3.09861  | -1.83936 | -0.61768 |
| C | -4.43485 | -0.89601 | -2.48995 | O | 3.9556   | -1.08079 | 0.29815  |
| H | -4.40013 | -1.38401 | -3.46458 | O | 3.6125   | -2.16579 | -1.94866 |
| C | -5.63309 | -0.71509 | -1.81144 | F | 3.24527  | -3.35955 | 0.09375  |
| H | -6.56033 | -1.06854 | -2.266   | H | -2.70372 | -3.48999 | 1.09241  |
| C | -5.66763 | -0.08982 | -0.55715 | H | -2.66089 | -3.27528 | 3.5774   |
| H | -6.61317 | 0.04448  | -0.03226 | H | -0.93224 | -1.8433  | 4.65791  |
| C | -4.47926 | 0.35101  | 0.00691  | H | 0.71619  | -0.61388 | 3.26194  |
| H | -4.47741 | 0.83452  | 0.98677  | H | -1.03996 | -2.28188 | -0.28719 |
| C | -3.25491 | 0.18545  | -0.66    | H | 1.80286  | -0.30663 | 1.18681  |
| C | -2.01184 | 0.61993  | -0.03059 | H | 0.9484   | -1.79411 | -1.42193 |
| H | -2.09182 | 1.0273   | 0.99283  |   |          |          |          |
| C | 0.36122  | 0.74223  | 0.01221  |   |          |          |          |

**(R, S, S)-INT3**

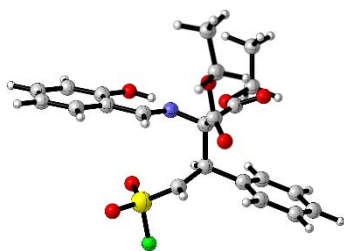

Charge = -1 Multiplicity = 1

|   |          |          |          |
|---|----------|----------|----------|
| C | 3.37408  | 0.58021  | 1.33375  |
| C | 4.70425  | 0.47241  | 1.76994  |
| H | 4.91114  | 0.61426  | 2.83137  |
| C | 5.71988  | 0.18807  | 0.86539  |
| H | 6.74689  | 0.10753  | 1.22642  |
| C | 5.44414  | 0.00025  | -0.49561 |
| H | 6.24703  | -0.22803 | -1.19636 |
| C | 4.13167  | 0.10551  | -0.93562 |
| H | 3.8879   | -0.04601 | -1.98999 |
| C | 3.0888   | 0.39864  | -0.04421 |
| C | 1.71256  | 0.46248  | -0.52434 |
| H | 1.55059  | 0.24728  | -1.59228 |
| C | -0.60743 | 0.59201  | -0.16703 |
| C | -0.82898 | 1.04894  | -1.61734 |
| C | -0.46909 | 2.82652  | -3.11469 |
| H | -1.54259 | 2.88502  | -3.34553 |
| C | 0.18657  | 4.18589  | -3.10625 |
| H | 0.08563  | 4.6534   | -4.09424 |
| H | 1.25534  | 4.09837  | -2.86888 |
| C | -1.52576 | 1.45131  | 0.69946  |
| C | -2.05654 | 2.07464  | 2.91063  |
| H | -1.89044 | 1.57554  | 3.8722   |
| H | -3.10246 | 1.93157  | 2.60625  |
| C | -1.69084 | 3.54259  | 2.97386  |
| H | -2.30302 | 4.04412  | 3.73536  |
| H | -1.87249 | 4.02793  | 2.00605  |
| H | -0.63262 | 3.66321  | 3.24255  |
| N | 0.75101  | 0.74501  | 0.27165  |
| O | 2.41725  | 0.85163  | 2.21766  |
| O | -0.31574 | 2.25911  | -1.80729 |
| O | -1.38151 | 0.41865  | -2.47813 |
| O | -1.21269 | 1.37065  | 1.98504  |
| O | -2.45933 | 2.07336  | 0.26075  |
| H | -0.00754 | 2.14826  | -3.84695 |
| H | -0.28723 | 4.83849  | -2.36082 |
| H | 1.54754  | 0.86694  | 1.71334  |

|   |          |          |          |
|---|----------|----------|----------|
| C | -4.59457 | -1.72069 | -1.02633 |
| C | -5.27461 | -1.59402 | 0.18652  |
| C | -4.56236 | -1.27041 | 1.34041  |
| C | -3.18288 | -1.06954 | 1.27463  |
| C | -2.49148 | -1.17911 | 0.06052  |
| C | -3.21662 | -1.51712 | -1.08845 |
| C | -0.98637 | -0.9486  | 0.04302  |
| C | -0.1895  | -1.81058 | -0.87211 |
| S | 0.99534  | -2.75882 | -0.29388 |
| O | 1.49368  | -2.36045 | 1.02441  |
| O | 1.95275  | -3.19586 | -1.30833 |
| F | 0.34418  | -4.25691 | 0.11425  |
| H | -5.14225 | -1.98314 | -1.93327 |
| H | -6.35287 | -1.75513 | 0.23206  |
| H | -5.07805 | -1.1821  | 2.29823  |
| H | -2.62805 | -0.82941 | 2.18523  |
| H | -2.69307 | -1.61239 | -2.03888 |
| H | -0.62805 | -1.1297  | 1.06615  |
| H | -0.41631 | -1.95081 | -1.92561 |

**(R, S, S)-TS2**

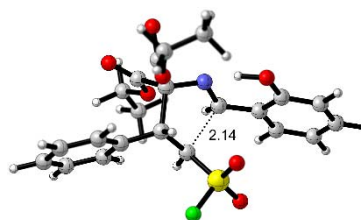

Charge = -1 Multiplicity = 1

Imaginary frequency = -231.6978 cm<sup>-1</sup>

|   |          |          |          |
|---|----------|----------|----------|
| C | 3.43672  | 0.7184   | -0.52797 |
| C | 4.82468  | 0.70398  | -0.30481 |
| H | 5.32425  | 1.65653  | -0.12155 |
| C | 5.53243  | -0.4926  | -0.32236 |
| H | 6.61009  | -0.47883 | -0.14705 |
| C | 4.87992  | -1.70736 | -0.56256 |
| H | 5.43798  | -2.6439  | -0.57382 |
| C | 3.50632  | -1.69946 | -0.78191 |
| H | 2.97152  | -2.637   | -0.95678 |
| C | 2.76935  | -0.51005 | -0.7714  |
| C | 1.30261  | -0.5423  | -0.95926 |
| H | 0.92572  | -1.48158 | -1.37614 |
| C | -0.70248 | 0.6393   | -0.87603 |
| C | -1.65451 | -0.16274 | -1.7679  |
| C | -2.06862 | -2.27817 | -2.71757 |

|   |          |          |          |
|---|----------|----------|----------|
| H | -2.25352 | -1.85635 | -3.71591 |
| C | -1.39528 | -3.62789 | -2.78412 |
| H | -2.03279 | -4.33627 | -3.32888 |
| H | -1.21954 | -4.02394 | -1.77406 |
| C | -1.0811  | 2.12482  | -0.9776  |
| C | -1.03792 | 4.19103  | 0.16639  |
| H | -1.30975 | 4.48051  | 1.18802  |
| H | -1.83396 | 4.50483  | -0.52103 |
| C | 0.30558  | 4.76208  | -0.23819 |
| H | 0.2739   | 5.85938  | -0.20359 |
| H | 0.56138  | 4.45344  | -1.26102 |
| H | 1.09237  | 4.41107  | 0.44327  |
| N | 0.68537  | 0.62153  | -1.16239 |
| O | 2.78065  | 1.87431  | -0.52836 |
| O | -1.1997  | -1.39402 | -1.99865 |
| O | -2.72602 | 0.2224   | -2.15528 |
| O | -0.98361 | 2.75815  | 0.19104  |
| O | -1.31839 | 2.68325  | -2.01483 |
| H | -3.0334  | -2.32049 | -2.18993 |
| H | -0.43063 | -3.55511 | -3.30448 |
| H | 1.80301  | 1.62354  | -0.74652 |
| C | -4.15886 | -1.86702 | 0.96677  |
| C | -4.98969 | -0.87355 | 1.48661  |
| C | -4.46333 | 0.39093  | 1.74976  |
| C | -3.11955 | 0.65993  | 1.48872  |
| C | -2.27578 | -0.32849 | 0.96581  |
| C | -2.81486 | -1.5969  | 0.71139  |
| C | -0.84141 | 0.0198   | 0.63038  |
| C | 0.16767  | -1.06953 | 0.77397  |
| S | 1.24974  | -0.91589 | 2.04585  |
| O | 1.77903  | 0.42999  | 2.17978  |
| O | 2.14122  | -2.05493 | 2.15587  |
| F | 0.33864  | -1.05231 | 3.41545  |
| H | -4.55732 | -2.86213 | 0.76137  |
| H | -6.04044 | -1.08597 | 1.68935  |
| H | -5.10136 | 1.17447  | 2.16203  |
| H | -2.71095 | 1.65227  | 1.6897   |
| H | -2.18021 | -2.38746 | 0.30629  |
| H | -0.53253 | 0.86494  | 1.2556   |
| H | -0.12196 | -2.11611 | 0.66384  |

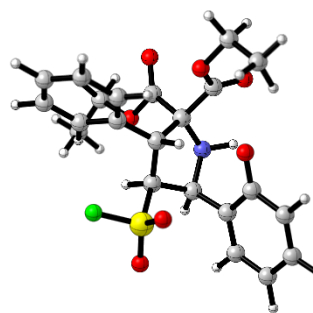

Charge = -1 Multiplicity = 1

|   |          |          |          |
|---|----------|----------|----------|
| C | -2.91686 | 0.82203  | 0.10264  |
| C | -4.28473 | 1.0661   | -0.26412 |
| H | -4.49048 | 2.00872  | -0.77795 |
| C | -5.30616 | 0.16672  | -0.00468 |
| H | -6.32544 | 0.41053  | -0.31776 |
| C | -5.05208 | -1.04448 | 0.65457  |
| H | -5.85423 | -1.75165 | 0.86771  |
| C | -3.73955 | -1.31187 | 1.04188  |
| H | -3.51389 | -2.24708 | 1.56448  |
| C | -2.68549 | -0.43264 | 0.78275  |
| C | -1.29649 | -0.81908 | 1.2524   |
| H | -1.41154 | -1.66461 | 1.94837  |
| C | 0.50578  | 0.77913  | 1.04555  |
| C | 1.87922  | 0.55133  | 1.68805  |
| C | 3.28642  | -1.05389 | 2.67293  |
| H | 3.52003  | -0.38977 | 3.51706  |
| C | 3.21725  | -2.50284 | 3.09025  |
| H | 4.18225  | -2.81514 | 3.50978  |
| H | 2.98871  | -3.14742 | 2.22989  |
| C | 0.34664  | 2.29231  | 0.87313  |
| C | 0.72471  | 4.11988  | -0.56885 |
| H | 1.59613  | 4.36641  | -1.18784 |
| H | 0.77915  | 4.68813  | 0.36815  |
| C | -0.57995 | 4.36846  | -1.29726 |
| H | -0.72587 | 5.44587  | -1.45496 |
| H | -1.41373 | 3.95422  | -0.71543 |
| H | -0.57467 | 3.86889  | -2.27642 |
| N | -0.5487  | 0.26269  | 1.90464  |
| O | -1.99192 | 1.65652  | -0.15942 |
| O | 2.0034   | -0.68913 | 2.14615  |
| O | 2.75266  | 1.37814  | 1.74683  |
| O | 0.85858  | 2.72461  | -0.26801 |
| O | -0.11753 | 2.9954   | 1.73206  |
| H | 4.04338  | -0.88117 | 1.89237  |
| H | 2.44055  | -2.64855 | 3.8528   |

**(R, S, S)-INT4**

|   |          |          |          |
|---|----------|----------|----------|
| H | -1.17209 | 1.03045  | 2.14247  |
| C | 3.81363  | -1.30691 | -1.53388 |
| C | 4.05803  | -0.45201 | -2.60851 |
| C | 3.11714  | 0.52411  | -2.93661 |
| C | 1.9486   | 0.65035  | -2.1867  |
| C | 1.69723  | -0.19181 | -1.0963  |
| C | 2.64178  | -1.1804  | -0.78834 |
| C | 0.41845  | -0.00595 | -0.30751 |
| C | -0.29071 | -1.27479 | 0.15847  |
| S | -1.10595 | -2.14813 | -1.15844 |
| O | -1.67924 | -1.27851 | -2.15192 |
| O | -1.82347 | -3.29049 | -0.65258 |
| F | 0.20576  | -2.76637 | -1.86005 |
| H | 4.5348   | -2.08423 | -1.2761  |
| H | 4.97369  | -0.55237 | -3.19325 |
| H | 3.29155  | 1.1909   | -3.78252 |
| H | 1.21578  | 1.41794  | -2.43949 |
| H | 2.46377  | -1.87398 | 0.03462  |
| H | -0.30317 | 0.56679  | -0.90291 |
| H | 0.40249  | -2.01907 | 0.57563  |

**(S, R, S)-INT1**

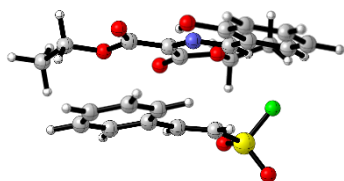

Charge = -1 Multiplicity = 1

|   |          |          |          |
|---|----------|----------|----------|
| C | 1.6565   | 2.9549   | -0.94979 |
| C | 2.46694  | 4.08797  | -0.78539 |
| H | 1.99     | 5.06831  | -0.83636 |
| C | 3.83564  | 3.96037  | -0.56148 |
| H | 4.4451   | 4.85722  | -0.43583 |
| C | 4.42644  | 2.6947   | -0.49403 |
| H | 5.49715  | 2.59205  | -0.31393 |
| C | 3.62899  | 1.56567  | -0.65893 |
| H | 4.0704   | 0.56649  | -0.6039  |
| C | 2.24837  | 1.66307  | -0.89154 |
| C | 1.44338  | 0.44784  | -1.0445  |
| H | 1.96888  | -0.51078 | -0.99171 |
| C | -0.84052 | -0.36687 | -1.23904 |
| C | -0.67124 | -1.81046 | -1.25303 |
| C | 0.90879  | -3.54625 | -1.59966 |
| H | 0.16928  | -3.98109 | -2.28753 |

|   |          |          |          |
|---|----------|----------|----------|
| C | 2.3141   | -3.67996 | -2.14383 |
| H | 2.5529   | -4.73962 | -2.30825 |
| H | 3.04405  | -3.26323 | -1.43788 |
| C | -2.15    | 0.27648  | -1.28067 |
| C | -4.49001 | 0.05361  | -1.20776 |
| H | -4.64081 | 0.48055  | -2.21224 |
| H | -4.54021 | 0.88708  | -0.49179 |
| C | -5.51467 | -1.01361 | -0.89662 |
| H | -6.5289  | -0.59696 | -0.95746 |
| H | -5.36071 | -1.40972 | 0.11719  |
| H | -5.43527 | -1.84668 | -1.60865 |
| N | 0.16687  | 0.55165  | -1.20572 |
| O | 0.34691  | 3.11359  | -1.15445 |
| O | 0.63009  | -2.15972 | -1.4341  |
| O | -1.52707 | -2.6713  | -1.14726 |
| O | -3.20558 | -0.55061 | -1.1391  |
| O | -2.31696 | 1.47787  | -1.41609 |
| H | 0.79873  | -4.05391 | -0.63047 |
| H | 2.4086   | -3.14996 | -3.10201 |
| H | -0.06351 | 2.18755  | -1.21207 |
| C | -1.59366 | 2.97396  | 1.6415   |
| C | -2.9623  | 2.82248  | 1.87017  |
| C | -3.51157 | 1.5449   | 1.99516  |
| C | -2.69273 | 0.42365  | 1.89757  |
| C | -1.31219 | 0.56917  | 1.68935  |
| C | -0.77058 | 1.85607  | 1.55237  |
| C | -0.48129 | -0.63419 | 1.62121  |
| C | 0.86069  | -0.64305 | 1.72519  |
| S | 1.67883  | -2.15836 | 1.8554   |
| O | 0.79992  | -3.27408 | 1.60365  |
| O | 2.56858  | -2.16488 | 2.98947  |
| F | 2.67831  | -2.10138 | 0.59428  |
| H | -1.16473 | 3.96921  | 1.51825  |
| H | -3.6042  | 3.70193  | 1.94183  |
| H | -4.58242 | 1.42262  | 2.1664   |
| H | -3.11872 | -0.57811 | 1.9838   |
| H | 0.29613  | 1.98296  | 1.35534  |
| H | -1.00479 | -1.59162 | 1.53535  |
| H | 1.50726  | 0.22076  | 1.88278  |

**(S, R, S)-TS1**

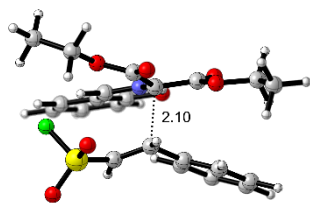

Charge = -1 Multiplicity = 1

Imaginary frequency = -322.9305 cm<sup>-1</sup>

|   |          |          |          |
|---|----------|----------|----------|
| C | -2.19296 | -2.70825 | -0.89209 |
| C | -3.13677 | -3.74363 | -0.79499 |
| H | -2.7987  | -4.76366 | -0.98376 |
| C | -4.45956 | -3.46851 | -0.4662  |
| H | -5.17525 | -4.28986 | -0.39676 |
| C | -4.87799 | -2.15451 | -0.22348 |
| H | -5.91545 | -1.94287 | 0.03629  |
| C | -3.95042 | -1.12373 | -0.31818 |
| H | -4.25178 | -0.0901  | -0.12826 |
| C | -2.60948 | -1.37094 | -0.65028 |
| C | -1.65623 | -0.26002 | -0.71996 |
| H | -2.03257 | 0.74223  | -0.49741 |
| C | 0.66152  | 0.3261   | -0.96958 |
| C | 0.60105  | 1.79054  | -1.22584 |
| C | -0.85153 | 3.61746  | -1.56336 |
| H | -0.18488 | 3.98525  | -2.35665 |
| C | -2.30663 | 3.84765  | -1.89772 |
| H | -2.48984 | 4.92053  | -2.04481 |
| H | -2.94496 | 3.49103  | -1.07894 |
| C | 1.89175  | -0.40506 | -1.38508 |
| C | 4.23159  | -0.38907 | -1.55865 |
| H | 4.20665  | -0.70563 | -2.61212 |
| H | 4.28828  | -1.29894 | -0.94237 |
| C | 5.378    | 0.55461  | -1.28185 |
| H | 6.33167  | 0.06815  | -1.52527 |
| H | 5.39587  | 0.84378  | -0.22183 |
| H | 5.28461  | 1.46532  | -1.8889  |
| N | -0.43417 | -0.50786 | -1.0461  |
| O | -0.93148 | -3.0034  | -1.20415 |
| O | -0.65538 | 2.20954  | -1.41345 |
| O | 1.54021  | 2.55233  | -1.23487 |
| O | 3.01899  | 0.29845  | -1.25078 |
| O | 1.89591  | -1.56336 | -1.74121 |
| H | -0.56029 | 4.10318  | -0.62095 |
| H | -2.581   | 3.3189   | -2.82113 |
| H | -0.42074 | -2.12589 | -1.23245 |

|   |          |          |         |
|---|----------|----------|---------|
| C | 1.41466  | -3.25381 | 1.64343 |
| C | 2.79814  | -3.31237 | 1.82224 |
| C | 3.54939  | -2.13694 | 1.78524 |
| C | 2.92127  | -0.91251 | 1.5607  |
| C | 1.53311  | -0.84448 | 1.37987 |
| C | 0.78498  | -2.03014 | 1.42858 |
| C | 0.88808  | 0.46611  | 1.116   |
| C | -0.36488 | 0.70229  | 1.70524 |
| S | -0.90334 | 2.26181  | 1.98496 |
| O | 0.05572  | 3.2673   | 1.5617  |
| O | -1.58237 | 2.39903  | 3.25861 |
| F | -2.15778 | 2.50826  | 0.94731 |
| H | 0.82042  | -4.16881 | 1.66435 |
| H | 3.28906  | -4.27201 | 1.99107 |
| H | 4.63079  | -2.17228 | 1.92902 |
| H | 3.51004  | 0.00631  | 1.52154 |
| H | -0.29545 | -1.99717 | 1.27475 |
| H | 1.5749   | 1.31419  | 1.03422 |
| H | -0.98409 | -0.06362 | 2.16699 |

**(S, R, S)-INT2**

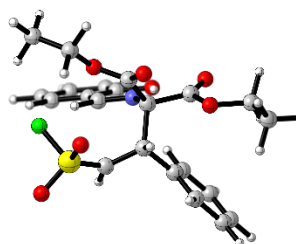

Charge = -1 Multiplicity = 1

|   |          |          |          |
|---|----------|----------|----------|
| C | -2.61519 | -2.67826 | -0.60117 |
| C | -3.65019 | -3.61956 | -0.48092 |
| H | -3.47202 | -4.63082 | -0.84866 |
| C | -4.86367 | -3.26046 | 0.09311  |
| H | -5.65478 | -4.00794 | 0.17694  |
| C | -5.08362 | -1.95869 | 0.5631   |
| H | -6.03877 | -1.68671 | 1.01215  |
| C | -4.06525 | -1.02206 | 0.44782  |
| H | -4.20731 | -0.00005 | 0.80829  |
| C | -2.82947 | -1.35787 | -0.1265  |
| C | -1.77441 | -0.3482  | -0.22188 |
| H | -1.99383 | 0.64824  | 0.17508  |
| C | 0.49839  | 0.18238  | -0.81088 |
| C | 0.29153  | 1.57172  | -1.45093 |
| C | -1.25115 | 3.3136   | -1.77597 |

|   |          |          |          |
|---|----------|----------|----------|
| H | -0.80115 | 3.53254  | -2.75442 |
| C | -2.75005 | 3.48799  | -1.78024 |
| H | -3.00149 | 4.5228   | -2.0484  |
| H | -3.15019 | 3.27259  | -0.78141 |
| C | 1.55849  | -0.58281 | -1.62569 |
| C | 3.84883  | -0.76747 | -2.09359 |
| H | 3.67505  | -0.90463 | -3.17049 |
| H | 3.85959  | -1.76488 | -1.62718 |
| C | 5.11559  | 0.00361  | -1.81274 |
| H | 5.97828  | -0.53217 | -2.22951 |
| H | 5.26377  | 0.11745  | -0.73015 |
| H | 5.06934  | 1.00154  | -2.26904 |
| N | -0.6535  | -0.66343 | -0.7579  |
| O | -1.45843 | -3.04355 | -1.15229 |
| O | -0.97282 | 1.94627  | -1.44028 |
| O | 1.19315  | 2.24826  | -1.87055 |
| O | 2.75652  | -0.02694 | -1.53873 |
| O | 1.34052  | -1.60558 | -2.22222 |
| H | -0.76169 | 3.93632  | -1.01346 |
| H | -3.21898 | 2.81587  | -2.51215 |
| H | -0.87289 | -2.21615 | -1.17965 |
| C | 2.21716  | -3.07984 | 1.62059  |
| C | 3.47474  | -2.8348  | 2.16887  |
| C | 3.96203  | -1.52657 | 2.21027  |
| C | 3.19332  | -0.47931 | 1.70689  |
| C | 1.92798  | -0.71372 | 1.15345  |
| C | 1.44652  | -2.02802 | 1.11786  |
| C | 1.12061  | 0.47152  | 0.64517  |
| C | 0.15212  | 0.88921  | 1.70145  |
| S | -0.34898 | 2.42392  | 1.8678   |
| O | 0.44352  | 3.37479  | 1.08477  |
| O | -0.77183 | 2.78227  | 3.21737  |
| F | -1.85699 | 2.63202  | 1.09849  |
| H | 1.82725  | -4.0983  | 1.57935  |
| H | 4.07486  | -3.65801 | 2.55954  |
| H | 4.94706  | -1.3216  | 2.63314  |
| H | 3.57924  | 0.5426   | 1.73657  |
| H | 0.47341  | -2.24193 | 0.6732   |
| H | 1.82875  | 1.29066  | 0.45826  |
| H | -0.32333 | 0.1771   | 2.37308  |

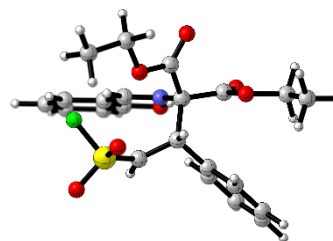

Charge = -1 Multiplicity = 1

|   |          |          |          |
|---|----------|----------|----------|
| C | -2.82002 | -2.56273 | -0.63317 |
| C | -3.96322 | -3.36301 | -0.48051 |
| H | -3.85822 | -4.44141 | -0.60528 |
| C | -5.18917 | -2.78463 | -0.17449 |
| H | -6.06533 | -3.42527 | -0.05871 |
| C | -5.31461 | -1.39843 | -0.0096  |
| H | -6.27972 | -0.95598 | 0.23664  |
| C | -4.18987 | -0.59935 | -0.16145 |
| H | -4.25121 | 0.48347  | -0.02648 |
| C | -2.94136 | -1.15793 | -0.47669 |
| C | -1.77223 | -0.29227 | -0.60886 |
| H | -1.92066 | 0.78527  | -0.45329 |
| C | 0.56075  | 0.00511  | -0.8621  |
| C | 0.40509  | 1.23461  | -1.76688 |
| C | -0.35652 | 3.44341  | -1.95097 |
| H | -0.87712 | 3.16451  | -2.87797 |
| C | -1.12692 | 4.45509  | -1.13885 |
| H | -1.16007 | 5.40565  | -1.6882  |
| H | -0.64098 | 4.59925  | -0.166   |
| C | 1.70056  | -0.81555 | -1.47212 |
| C | 4.02756  | -0.83572 | -1.78974 |
| H | 3.9358   | -1.1858  | -2.8279  |
| H | 4.10323  | -1.72223 | -1.14078 |
| C | 5.19644  | 0.10088  | -1.60464 |
| H | 6.12898  | -0.40973 | -1.87788 |
| H | 5.26908  | 0.42355  | -0.55701 |
| H | 5.08529  | 0.9893   | -2.24081 |
| N | -0.62643 | -0.8005  | -0.88359 |
| O | -1.6511  | -3.13799 | -0.91659 |
| O | -0.17145 | 2.25497  | -1.16127 |
| O | 0.74046  | 1.23639  | -2.92507 |
| O | 2.83573  | -0.12665 | -1.43457 |
| O | 1.60731  | -1.94005 | -1.88417 |
| H | 0.64042  | 3.81401  | -2.23172 |
| H | -2.15075 | 4.10986  | -0.95247 |
| H | -0.97113 | -2.39837 | -1.00901 |
| C | 2.16879  | -2.99186 | 1.93127  |

**(S, R, S)-INT3**



|   |          |          |         |
|---|----------|----------|---------|
| C | 3.44749  | -2.68351 | 2.39731 |
| C | 3.92158  | -1.37526 | 2.28926 |
| C | 3.12062  | -0.38575 | 1.71883 |
| C | 1.83643  | -0.68386 | 1.25088 |
| C | 1.369    | -1.99982 | 1.36349 |
| C | 0.96305  | 0.40538  | 0.64615 |
| C | -0.17302 | 0.67356  | 1.57266 |
| S | -0.73245 | 2.14908  | 1.94873 |
| O | 0.18839  | 3.24532  | 1.64883 |
| O | -1.47321 | 2.17815  | 3.20806 |
| F | -2.0218  | 2.55549  | 0.91872 |
| H | 1.79033  | -4.01262 | 2.00745 |
| H | 4.07278  | -3.4599  | 2.84081 |
| H | 4.92123  | -1.12336 | 2.64782 |
| H | 3.49766  | 0.6359   | 1.62956 |
| H | 0.37627  | -2.25401 | 0.98344 |
| H | 1.56685  | 1.31855  | 0.55515 |
| H | -0.74394 | -0.13316 | 2.02918 |

**(S, R, S)-TS2**

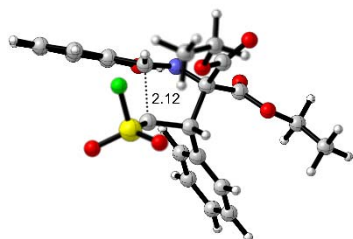

Charge = -1 Multiplicity = 1

Imaginary frequency = -314.1367 cm<sup>-1</sup>

|   |          |          |          |
|---|----------|----------|----------|
| C | -2.50231 | -2.36614 | -1.12626 |
| C | -3.60721 | -3.22908 | -1.03577 |
| H | -3.46176 | -4.27871 | -1.29572 |
| C | -4.8462  | -2.75068 | -0.62234 |
| H | -5.69057 | -3.43968 | -0.55741 |
| C | -5.01829 | -1.40228 | -0.28889 |
| H | -5.98988 | -1.03327 | 0.04073  |
| C | -3.9298  | -0.54052 | -0.38136 |
| H | -4.02728 | 0.5137   | -0.10871 |
| C | -2.67438 | -0.99756 | -0.79979 |
| C | -1.5226  | -0.07248 | -0.8429  |
| H | -1.78709 | 0.99045  | -0.85129 |
| C | 0.73943  | 0.23109  | -0.99517 |
| C | 0.71775  | 1.65773  | -1.55719 |
| C | -0.1081  | 3.84484  | -1.29671 |
| H | -0.44671 | 3.82489  | -2.34213 |

|   |          |          |          |
|---|----------|----------|----------|
| C | -1.05964 | 4.59736  | -0.39854 |
| H | -1.05618 | 5.66042  | -0.67385 |
| H | -0.75554 | 4.48821  | 0.65059  |
| C | 2.0224   | -0.4286  | -1.48667 |
| C | 4.36092  | -0.36068 | -1.26929 |
| H | 4.52464  | -0.50343 | -2.34723 |
| H | 4.33518  | -1.35621 | -0.79878 |
| C | 5.40906  | 0.52966  | -0.64709 |
| H | 6.4047   | 0.09018  | -0.79101 |
| H | 5.22877  | 0.64036  | 0.43101  |
| H | 5.39655  | 1.52528  | -1.11083 |
| N | -0.39146 | -0.52129 | -1.38052 |
| O | -1.31898 | -2.84387 | -1.51791 |
| O | -0.00828 | 2.49253  | -0.82272 |
| O | 1.25186  | 1.97271  | -2.59134 |
| O | 3.08578  | 0.25698  | -1.07211 |
| O | 2.08904  | -1.45633 | -2.10531 |
| H | 0.90162  | 4.28101  | -1.28503 |
| H | -2.08018 | 4.20707  | -0.49609 |
| H | -0.68602 | -2.02105 | -1.55584 |
| C | 1.95686  | -3.25796 | 1.44904  |
| C | 3.12159  | -2.9973  | 2.17274  |
| C | 3.50462  | -1.67585 | 2.40652  |
| C | 2.72666  | -0.62574 | 1.91834  |
| C | 1.55544  | -0.87617 | 1.19451  |
| C | 1.17883  | -2.20653 | 0.96438  |
| C | 0.73049  | 0.26803  | 0.64599  |
| C | -0.69581 | 0.1919   | 1.08808  |
| S | -1.34448 | 1.48777  | 1.95811  |
| O | -0.42321 | 2.57527  | 2.24187  |
| O | -2.26259 | 1.04027  | 2.98982  |
| F | -2.3866  | 2.20504  | 0.90238  |
| H | 1.65172  | -4.28805 | 1.25704  |
| H | 3.7285   | -3.82075 | 2.55247  |
| H | 4.41383  | -1.46012 | 2.97061  |
| H | 3.03326  | 0.40776  | 2.09607  |
| H | 0.28127  | -2.41798 | 0.37792  |
| H | 1.18755  | 1.2158   | 0.95511  |
| H | -1.04232 | -0.72511 | 1.56653  |

**(S, R, S)-INT4**

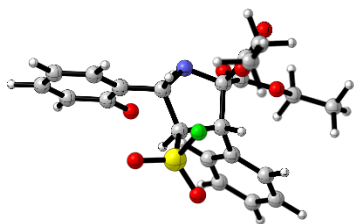

Charge = -1 Multiplicity = 1

|   |          |          |          |
|---|----------|----------|----------|
| C | -2.58758 | -2.03768 | -1.0003  |
| C | -3.77061 | -2.80847 | -1.23764 |
| H | -3.641   | -3.8837  | -1.38539 |
| C | -5.03357 | -2.23247 | -1.28052 |
| H | -5.90359 | -2.86884 | -1.46566 |
| C | -5.21164 | -0.85566 | -1.09115 |
| H | -6.20526 | -0.4075  | -1.12325 |
| C | -4.07941 | -0.07107 | -0.85859 |
| H | -4.18795 | 1.00684  | -0.70087 |
| C | -2.80264 | -0.62444 | -0.81284 |
| C | -1.59576 | 0.22867  | -0.54311 |
| H | -1.88821 | 1.28747  | -0.4654  |
| C | 0.6959   | 0.50355  | -1.00676 |
| C | 0.83922  | 1.99564  | -1.32705 |
| C | 0.12621  | 4.16033  | -0.73408 |
| H | -0.31098 | 4.30252  | -1.73265 |
| C | -0.69972 | 4.80955  | 0.34916  |
| H | -0.74907 | 5.89238  | 0.17573  |
| H | -0.25312 | 4.63048  | 1.33617  |
| C | 1.85191  | -0.23728 | -1.66732 |
| C | 4.17683  | -0.54883 | -1.54867 |
| H | 4.26016  | -0.65923 | -2.63893 |
| H | 4.02425  | -1.55002 | -1.11394 |
| C | 5.37216  | 0.15158  | -0.95064 |
| H | 6.2823   | -0.42621 | -1.1576  |
| H | 5.25612  | 0.24427  | 0.13786  |
| H | 5.48952  | 1.15479  | -1.38214 |
| N | -0.57063 | 0.08622  | -1.58071 |
| O | -1.41669 | -2.54967 | -0.95655 |
| O | 0.18155  | 2.75245  | -0.46064 |
| O | 1.40507  | 2.42041  | -2.29976 |
| O | 3.01447  | 0.23678  | -1.25023 |
| O | 1.71903  | -1.17417 | -2.40838 |
| H | 1.15471  | 4.54744  | -0.76126 |
| H | -1.72108 | 4.40642  | 0.35206  |
| H | -0.50459 | -0.91891 | -1.78351 |
| C | 2.33279  | -3.19206 | 1.0115   |

|   |          |          |         |
|---|----------|----------|---------|
| C | 3.44584  | -2.85169 | 1.78147 |
| C | 3.63449  | -1.52558 | 2.17345 |
| C | 2.71667  | -0.54805 | 1.79077 |
| C | 1.60224  | -0.8814  | 1.01455 |
| C | 1.41195  | -2.21546 | 0.62807 |
| C | 0.65152  | 0.20287  | 0.55337 |
| C | -0.82997 | -0.16762 | 0.7539  |
| S | -1.4879  | 0.54336  | 2.23062 |
| O | -0.59685 | 0.3485   | 3.34761 |
| O | -2.90116 | 0.30228  | 2.36416 |
| F | -1.35709 | 2.10423  | 1.8591  |
| H | 2.17745  | -4.22791 | 0.70519 |
| H | 4.16263  | -3.61857 | 2.07927 |
| H | 4.49936  | -1.25032 | 2.77942 |
| H | 2.87053  | 0.49111  | 2.09079 |
| H | 0.53932  | -2.48588 | 0.0231  |
| H | 0.89294  | 1.12902  | 1.08959 |
| H | -0.95422 | -1.25021 | 0.90958 |

(*S, R, R*)-INT1

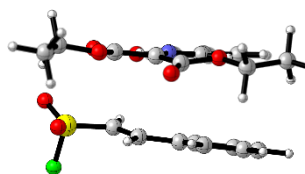

Charge = -1 Multiplicity = 1

|   |          |          |          |
|---|----------|----------|----------|
| C | 1.91522  | -2.25858 | -1.36705 |
| C | 2.70163  | -3.41784 | -1.42654 |
| H | 2.19147  | -4.37621 | -1.53771 |
| C | 4.09014  | -3.34269 | -1.34358 |
| H | 4.68182  | -4.25866 | -1.39347 |
| C | 4.72283  | -2.10469 | -1.19589 |
| H | 5.80962  | -2.04286 | -1.12822 |
| C | 3.94638  | -0.95042 | -1.13199 |
| H | 4.42295  | 0.02537  | -1.00242 |
| C | 2.54756  | -0.99466 | -1.21741 |
| C | 1.76087  | 0.23568  | -1.08714 |
| H | 2.30766  | 1.15714  | -0.85134 |
| C | -0.52608 | 1.09279  | -1.04467 |
| C | -0.34813 | 2.47409  | -0.6392  |
| C | 1.26481  | 4.16089  | -0.25326 |
| H | 0.9344   | 4.26285  | 0.79306  |
| C | 2.75861  | 4.35204  | -0.38933 |
| H | 3.04858  | 5.35236  | -0.04088 |

|   |          |          |          |                                                  |                            |
|---|----------|----------|----------|--------------------------------------------------|----------------------------|
| H | 3.06623  | 4.2454   | -1.43891 | Charge = -1                                      | Multiplicity = 1           |
| C | -1.83137 | 0.51096  | -1.29325 | Imaginary frequency = -367.6950 cm <sup>-1</sup> |                            |
| C | -4.14663 | 0.82465  | -1.59054 | C                                                | 2.33143 -2.54572 -0.97126  |
| H | -4.31885 | -0.10458 | -1.03387 | C                                                | 3.2634 -3.59653 -0.9494    |
| H | -4.14728 | 0.57683  | -2.66471 | H                                                | 2.88762 -4.61617 -1.04582  |
| C | -5.18774 | 1.87092  | -1.26349 | C                                                | 4.62139 -3.33631 -0.80661  |
| H | -6.18803 | 1.51147  | -1.53987 | H                                                | 5.32625 -4.16975 -0.7933   |
| H | -4.98913 | 2.80444  | -1.80808 | C                                                | 5.09062 -2.02299 -0.67804  |
| H | -5.18106 | 2.08932  | -0.18637 | H                                                | 6.15629 -1.82442 -0.56263  |
| N | 0.48081  | 0.17911  | -1.20999 | C                                                | 4.17585 -0.97716 -0.69707  |
| O | 0.58391  | -2.37043 | -1.43642 | H                                                | 4.51641 0.05647 -0.59178   |
| O | 0.95306  | 2.85816  | -0.72164 | C                                                | 2.80039 -1.21027 -0.8474   |
| O | -1.18938 | 3.26036  | -0.23838 | C                                                | 1.8613 -0.08645 -0.82347   |
| O | -2.87579 | 1.35982  | -1.23596 | H                                                | 2.28014 0.91061 -0.64081   |
| O | -2.00785 | -0.67345 | -1.55819 | C                                                | -0.49291 0.52527 -0.86352  |
| H | 0.70424  | 4.90639  | -0.83791 | C                                                | -0.41609 2.00929 -0.98563  |
| H | 3.2979   | 3.60236  | 0.20757  | C                                                | 1.04821 3.85167 -1.19777   |
| H | 0.20433  | -1.42812 | -1.4044  | H                                                | 0.56396 4.26334 -0.30059   |
| C | 2.98754  | -0.17782 | 2.23741  | C                                                | 2.54166 4.07828 -1.18281   |
| C | 3.16907  | 1.18862  | 2.4633   | H                                                | 2.75815 5.15473 -1.18259   |
| C | 2.07247  | 2.05211  | 2.43361  | H                                                | 3.01309 3.62769 -2.067     |
| C | 0.79888  | 1.55154  | 2.17469  | C                                                | -1.69417 -0.15878 -1.43101 |
| C | 0.60845  | 0.18225  | 1.93786  | C                                                | -3.92661 -0.00936 -2.13458 |
| C | 1.71627  | -0.67803 | 1.97508  | H                                                | -4.12387 -0.8788 -1.49649  |
| C | -0.74442 | -0.30079 | 1.64804  | H                                                | -3.7583 -0.36342 -3.1638   |
| C | -1.05073 | -1.52276 | 1.18748  | C                                                | -5.04451 1.00322 -2.06044  |
| S | -2.7201  | -1.9497  | 1.00357  | H                                                | -5.97756 0.56239 -2.4358   |
| O | -2.92814 | -2.97896 | 0.02077  | H                                                | -4.81085 1.89187 -2.66284  |
| O | -3.5904  | -0.8027  | 1.11274  | H                                                | -5.19889 1.31483 -1.01838  |
| F | -2.93655 | -2.72338 | 2.40729  | N                                                | 0.61171 -0.31011 -1.00237  |
| H | 3.84195  | -0.8557  | 2.25878  | O                                                | 1.03672 -2.82804 -1.10021  |
| H | 4.16676  | 1.58056  | 2.66796  | O                                                | 0.82612 2.44049 -1.23491   |
| H | 2.21187  | 3.11938  | 2.61426  | O                                                | -1.33555 2.77363 -0.80589  |
| H | -0.06133 | 2.22476  | 2.13476  | O                                                | -2.73604 0.63094 -1.67041  |
| H | 1.58517  | -1.74757 | 1.79861  | O                                                | -1.72719 -1.35741 -1.60711 |
| H | -1.56321 | 0.40302  | 1.82921  | H                                                | 0.5679 4.31035 -2.07514    |
| H | -0.35833 | -2.30817 | 0.88311  | H                                                | 2.98513 3.63264 -0.28052   |

**(S, R, R)-TS1**

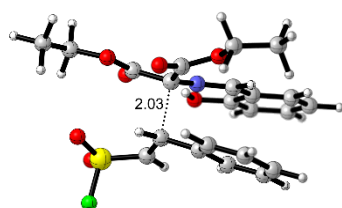

|   |         |         |         |
|---|---------|---------|---------|
| C | 2.5707  | 0.88399 | 2.54737 |
| C | 2.57574 | 2.26767 | 2.71914 |
| C | 1.43567 | 3.00676 | 2.39346 |
| C | 0.3078  | 2.36622 | 1.88636 |
| C | 0.29507 | 0.97533 | 1.69045 |
| C | 1.43942 | 0.24338 | 2.04116 |

|   |          |          |         |
|---|----------|----------|---------|
| C | -0.90744 | 0.31748  | 1.11095 |
| C | -1.16161 | -1.04197 | 1.41378 |
| S | -2.70914 | -1.63031 | 1.38614 |
| O | -2.80458 | -3.04652 | 1.07922 |
| O | -3.66886 | -0.69334 | 0.81586 |
| F | -3.18765 | -1.63528 | 2.96758 |
| H | 3.45228  | 0.29531  | 2.80657 |
| H | 3.4603   | 2.76892  | 3.11509 |
| H | 1.42404  | 4.08859  | 2.53813 |
| H | -0.58041 | 2.94626  | 1.62893 |
| H | 1.45299  | -0.84016 | 1.91624 |
| H | -1.78899 | 0.96659  | 1.07107 |
| H | -0.40604 | -1.79252 | 1.63076 |

**(S, R, R)-INT2**

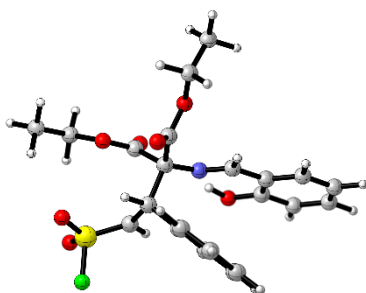

Charge = -1 Multiplicity = 1

|   |          |          |          |
|---|----------|----------|----------|
| C | 3.22771  | -0.44869 | -1.92941 |
| C | 4.43482  | -0.89545 | -2.49031 |
| H | 4.40012  | -1.383   | -3.46516 |
| C | 5.63304  | -0.71494 | -1.81165 |
| H | 6.56027  | -1.06828 | -2.26632 |
| C | 5.66757  | -0.09025 | -0.55708 |
| H | 6.6131   | 0.04372  | -0.03208 |
| C | 4.47921  | 0.35044  | 0.00712  |
| H | 4.47736  | 0.83352  | 0.98718  |
| C | 3.25489  | 0.1853   | -0.65994 |
| C | 2.01182  | 0.61964  | -0.03042 |
| H | 2.09178  | 1.02663  | 0.99315  |
| C | -0.36121 | 0.74219  | 0.01228  |
| C | -0.30695 | 1.80399  | 1.12397  |
| C | 0.36856  | 4.00845  | 1.60682  |
| H | 0.92061  | 3.66495  | 2.49342  |
| C | 1.06863  | 5.14548  | 0.9042   |
| H | 1.15746  | 6.00235  | 1.58435  |
| H | 0.5017   | 5.46026  | 0.01799  |
| C | -1.34856 | 1.25255  | -1.04923 |

|   |          |          |          |
|---|----------|----------|----------|
| C | -3.62911 | 1.7168   | -1.3558  |
| H | -3.74009 | 0.77955  | -1.92407 |
| H | -3.4102  | 2.52715  | -2.06565 |
| C | -4.84211 | 2.00175  | -0.50587 |
| H | -5.72151 | 2.14075  | -1.14863 |
| H | -4.69571 | 2.91549  | 0.08647  |
| H | -5.01901 | 1.1524   | 0.16582  |
| N | 0.89474  | 0.49645  | -0.63591 |
| O | 2.08968  | -0.63708 | -2.5951  |
| O | 0.27214  | 2.91458  | 0.68128  |
| O | -0.75406 | 1.67747  | 2.23172  |
| O | -2.50706 | 1.55394  | -0.47824 |
| O | -1.11497 | 1.35129  | -2.22151 |
| H | -0.64662 | 4.28004  | 1.92954  |
| H | 2.07649  | 4.84371  | 0.58912  |
| H | 1.35464  | -0.22381 | -2.04657 |
| C | 1.95114  | -2.86498 | 1.57628  |
| C | 1.92873  | -2.74339 | 2.96766  |
| C | 0.96226  | -1.94012 | 3.5711   |
| C | 0.02876  | -1.25568 | 2.78926  |
| C | 0.04009  | -1.36947 | 1.39461  |
| C | 1.01162  | -2.18884 | 0.80097  |
| C | -0.96933 | -0.6159  | 0.54273  |
| C | -1.54581 | -1.38456 | -0.60916 |
| S | -3.09866 | -1.83923 | -0.61777 |
| O | -3.61257 | -2.16553 | -1.94878 |
| O | -3.95561 | -1.08065 | 0.2981   |
| F | -3.24546 | -3.35946 | 0.09354  |
| H | 2.70361  | -3.49021 | 1.0923   |
| H | 2.66087  | -3.27549 | 3.57729  |
| H | 0.93229  | -1.84346 | 4.65785  |
| H | -0.71615 | -0.61399 | 3.26193  |
| H | 1.03985  | -2.28204 | -0.28725 |
| H | -1.80286 | -0.30671 | 1.18683  |
| H | -0.94844 | -1.79402 | -1.42202 |

**(S, R, R)-INT3**

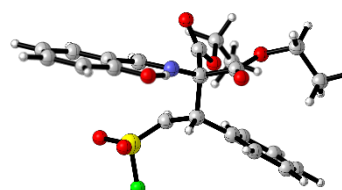

Charge = -1 Multiplicity = 1

|   |         |         |         |
|---|---------|---------|---------|
| C | 3.76127 | 1.49517 | -0.7419 |
|---|---------|---------|---------|

|   |          |          |          |
|---|----------|----------|----------|
| C | 5.11186  | 1.64669  | -1.09508 |
| H | 5.34984  | 2.25001  | -1.97201 |
| C | 6.10841  | 1.03779  | -0.34223 |
| H | 7.15186  | 1.16858  | -0.63504 |
| C | 5.79241  | 0.2602   | 0.77964  |
| H | 6.58047  | -0.21744 | 1.36162  |
| C | 4.45919  | 0.10472  | 1.13516  |
| H | 4.18511  | -0.50423 | 2.0002   |
| C | 3.43411  | 0.71294  | 0.39584  |
| C | 2.03827  | 0.50676  | 0.77453  |
| H | 1.84492  | -0.15813 | 1.62748  |
| C | -0.28284 | 0.76267  | 0.34728  |
| C | -0.61742 | 0.61722  | 1.84033  |
| C | -2.1069  | -0.27086 | 3.42107  |
| H | -2.39601 | 0.72998  | 3.77425  |
| C | -3.26375 | -1.24012 | 3.45632  |
| H | -3.65023 | -1.31705 | 4.48091  |
| H | -2.94491 | -2.24044 | 3.13182  |
| C | -1.09429 | 1.93206  | -0.22966 |
| C | -3.01845 | 3.27773  | 0.0812   |
| H | -2.3869  | 4.11582  | -0.24214 |
| H | -3.56269 | 3.56751  | 0.98716  |
| C | -3.96034 | 2.83618  | -1.01748 |
| H | -4.67963 | 3.63903  | -1.22963 |
| H | -4.51392 | 1.93673  | -0.71241 |
| H | -3.4053  | 2.60773  | -1.93625 |
| N | 1.10038  | 1.07655  | 0.11819  |
| O | 2.82368  | 2.0856   | -1.47969 |
| O | -1.66643 | -0.15763 | 2.0621   |
| O | -0.00417 | 1.17446  | 2.71344  |
| O | -2.165   | 2.20215  | 0.50536  |
| O | -0.78982 | 2.51649  | -1.23485 |
| H | -1.26291 | -0.61101 | 4.0376   |
| H | -4.07622 | -0.89829 | 2.80052  |
| H | 1.93495  | 1.85623  | -1.06361 |
| C | -4.28146 | -1.58608 | -0.72531 |
| C | -4.65275 | -0.99482 | -1.93554 |
| C | -3.70807 | -0.27247 | -2.66146 |
| C | -2.40844 | -0.13232 | -2.17158 |
| C | -2.02622 | -0.71065 | -0.9546  |
| C | -2.97997 | -1.45153 | -0.24552 |
| C | -0.58171 | -0.56544 | -0.49127 |
| C | 0.01761  | -1.73696 | 0.21115  |
| S | 1.25029  | -2.55936 | -0.45519 |

|   |          |          |          |
|---|----------|----------|----------|
| O | 1.94216  | -3.44055 | 0.48272  |
| O | 2.04241  | -1.78189 | -1.41038 |
| F | 0.63263  | -3.71831 | -1.50694 |
| H | -5.00945 | -2.16567 | -0.15447 |
| H | -5.67025 | -1.10749 | -2.31342 |
| H | -3.97987 | 0.1856   | -3.61419 |
| H | -1.67258 | 0.43557  | -2.74604 |
| H | -2.69505 | -1.92989 | 0.69035  |
| H | 0.0097   | -0.38792 | -1.40045 |
| H | -0.45759 | -2.2389  | 1.05105  |

**(S, R, R)-TS2**

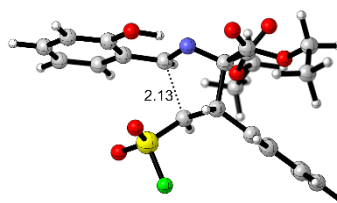

Charge = -1 Multiplicity = 1

Imaginary frequency = -236.7922 cm<sup>-1</sup>

|   |          |          |          |
|---|----------|----------|----------|
| C | -3.41527 | 1.5448   | -0.09349 |
| C | -4.76816 | 1.73189  | 0.24274  |
| H | -5.0602  | 2.69088  | 0.67361  |
| C | -5.69896 | 0.72164  | 0.02953  |
| H | -6.74314 | 0.89132  | 0.30014  |
| C | -5.3128  | -0.50359 | -0.52661 |
| H | -6.04554 | -1.29412 | -0.69031 |
| C | -3.97681 | -0.69595 | -0.86269 |
| H | -3.64675 | -1.64908 | -1.28477 |
| C | -3.01965 | 0.30401  | -0.65926 |
| C | -1.59851 | 0.05638  | -0.98113 |
| H | -1.42802 | -0.80576 | -1.63913 |
| C | 0.5885   | 0.78261  | -0.82163 |
| C | 1.12167  | 0.09976  | -2.08435 |
| C | 1.11933  | -1.89137 | -3.34851 |
| H | 2.21529  | -1.9042  | -3.44298 |
| C | 0.53941  | -3.28169 | -3.24484 |
| H | 0.7794   | -3.85264 | -4.15116 |
| H | -0.55338 | -3.23829 | -3.1396  |
| C | 1.39052  | 2.06091  | -0.56795 |
| C | 3.5647   | 2.97048  | -0.42371 |
| H | 3.12618  | 3.83827  | -0.934   |
| H | 4.50013  | 2.69681  | -0.92572 |
| C | 3.79049  | 3.25902  | 1.0461   |

|   |          |          |          |   |          |          |          |
|---|----------|----------|----------|---|----------|----------|----------|
| H | 4.45856  | 4.12473  | 1.15246  | H | 4.49055  | 2.00856  | -0.77839 |
| H | 4.2554   | 2.39826  | 1.54515  | C | 5.30618  | 0.1667   | -0.00473 |
| H | 2.83935  | 3.49282  | 1.54351  | H | 6.32546  | 0.41043  | -0.31788 |
| N | -0.78177 | 1.10834  | -0.95984 | C | 5.05209  | -1.04435 | 0.65477  |
| O | -2.54651 | 2.52881  | 0.1051   | H | 5.85422  | -1.75149 | 0.86804  |
| O | 0.77691  | -1.18525 | -2.14885 | C | 3.73955  | -1.31162 | 1.04218  |
| O | 1.68358  | 0.67376  | -2.98171 | H | 3.51388  | -2.24672 | 1.56498  |
| O | 2.7003   | 1.84359  | -0.61851 | C | 2.68553  | -0.43241 | 0.78288  |
| O | 0.89732  | 3.12579  | -0.30225 | C | 1.29649  | -0.81873 | 1.2525   |
| H | 0.71716  | -1.33776 | -4.2085  | H | 1.41144  | -1.66414 | 1.94863  |
| H | 0.95419  | -3.81748 | -2.37977 | C | -0.50593 | 0.77933  | 1.04539  |
| H | -1.6397  | 2.17183  | -0.25273 | C | -1.87939 | 0.55136  | 1.68778  |
| C | 3.71655  | -2.44009 | 0.59067  | C | -3.2862  | -1.05399 | 2.67308  |
| C | 4.51976  | -1.79301 | 1.53026  | H | -4.04313 | -0.88142 | 1.89247  |
| C | 4.05436  | -0.62814 | 2.14045  | C | -3.21673 | -2.50293 | 3.09037  |
| C | 2.80311  | -0.11537 | 1.80126  | H | -4.18168 | -2.81549 | 3.50981  |
| C | 1.993    | -0.7447  | 0.84781  | H | -2.44005 | -2.64849 | 3.85296  |
| C | 2.46449  | -1.92424 | 0.25563  | C | -0.34704 | 2.29252  | 0.87287  |
| C | 0.64617  | -0.13758 | 0.51757  | C | -0.72528 | 4.11991  | -0.56919 |
| C | -0.51593 | -1.07619 | 0.46892  | H | -0.78057 | 4.68831  | 0.36767  |
| S | -1.50045 | -1.12274 | 1.82695  | H | -1.59628 | 4.36617  | -1.18889 |
| O | -2.55151 | -2.11615 | 1.71208  | C | 0.57989  | 4.36866  | -1.29665 |
| O | -1.80954 | 0.19663  | 2.34966  | H | 0.72564  | 5.44608  | -1.45443 |
| F | -0.56128 | -1.7481  | 3.03106  | H | 0.57544  | 3.86892  | -2.27572 |
| H | 4.06344  | -3.35967 | 0.11615  | H | 1.41333  | 3.9547   | -0.71413 |
| H | 5.49795  | -2.19936 | 1.79188  | N | 0.5486   | 0.26309  | 1.90453  |
| H | 4.66539  | -0.11655 | 2.88651  | O | 1.99194  | 1.65647  | -0.15978 |
| H | 2.44339  | 0.79651  | 2.28447  | O | -2.00322 | -0.68893 | 2.14641  |
| H | 1.84427  | -2.44905 | -0.47022 | O | -2.75316 | 1.37788  | 1.74593  |
| H | 0.42414  | 0.61119  | 1.29336  | O | -0.85917 | 2.72466  | -0.26824 |
| H | -0.3767  | -2.08541 | 0.07495  | O | 0.11709  | 2.99576  | 1.7317   |

**(S, R, R)-INT4**

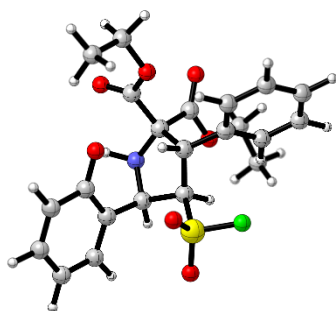

Charge = -1 Multiplicity = 1

|   |         |         |          |   |         |          |          |
|---|---------|---------|----------|---|---------|----------|----------|
| C | 2.91691 | 0.82208 | 0.10247  | S | 1.10631 | -2.14792 | -1.15832 |
| C | 4.28477 | 1.06605 | -0.26435 | O | 1.82381 | -3.29022 | -0.65234 |

|   |          |          |          |
|---|----------|----------|----------|
| O | 1.67966  | -1.27831 | -2.15178 |
| F | -0.20529 | -2.76627 | -1.86005 |
| H | -4.53446 | -2.0851  | -1.27555 |
| H | -4.97388 | -0.55356 | -3.19283 |
| H | -3.29217 | 1.18999  | -3.78249 |
| H | -1.21628 | 1.41761  | -2.43974 |
| H | -2.46333 | -1.87428 | 0.0349   |
| H | 0.30306  | 0.56691  | -0.90311 |
| H | -0.40226 | -2.01895 | 0.57561  |

**(R, S, R)-SUB**

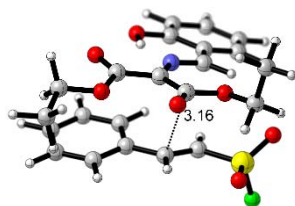

Charge=-1 Multiplicity=1

|   |          |          |          |
|---|----------|----------|----------|
| C | 2.06674  | -2.67332 | -1.04769 |
| C | 3.0247   | -3.69117 | -0.928   |
| H | 2.68202  | -4.72513 | -0.99643 |
| C | 4.3684   | -3.38654 | -0.7254  |
| H | 5.0949   | -4.19629 | -0.63534 |
| C | 4.78613  | -2.05509 | -0.63388 |
| H | 5.83706  | -1.81437 | -0.46967 |
| C | 3.8418   | -1.03929 | -0.75387 |
| H | 4.14552  | 0.00854  | -0.67777 |
| C | 2.48211  | -1.31554 | -0.96628 |
| C | 1.5197   | -0.21412 | -1.06962 |
| H | 1.91823  | 0.80265  | -0.99025 |
| C | 0.88186  | 0.71295  | 1.67247  |
| H | 1.64548  | -0.06526 | 1.68572  |
| C | -0.86433 | 0.27759  | -1.21885 |
| C | -0.45085 | 0.5397   | 1.69121  |
| H | -1.08832 | 1.42933  | 1.70321  |
| C | -0.9133  | 1.72685  | -1.20503 |
| C | 0.44137  | 3.68018  | -1.32723 |
| H | 1.41356  | 3.94494  | -0.89222 |
| H | 0.25369  | -2.14024 | -1.26037 |
| C | 0.36236  | 4.06352  | -2.79225 |
| H | 0.50479  | 5.14701  | -2.90896 |
| H | -0.62077 | 3.79656  | -3.20271 |
| C | -2.06512 | -0.55514 | -1.25232 |
| C | -4.40605 | -0.69702 | -1.06967 |

|   |          |          |          |
|---|----------|----------|----------|
| H | -4.2751  | -1.57766 | -0.42425 |
| H | -4.56632 | -1.06656 | -2.09544 |
| C | -5.55406 | 0.17059  | -0.60631 |
| H | -6.49572 | -0.39334 | -0.64325 |
| H | -5.65303 | 1.05848  | -1.24592 |
| H | -5.389   | 0.5057   | 0.42768  |
| C | -1.13032 | -0.75585 | 1.73929  |
| C | -2.5107  | -0.78201 | 1.99369  |
| H | -3.04486 | 0.15881  | 2.14185  |
| C | -3.1928  | -1.99344 | 2.05682  |
| H | -4.26474 | -2.00373 | 2.26164  |
| C | -2.50544 | -3.19153 | 1.85255  |
| H | -3.04    | -4.1418  | 1.8961   |
| C | -1.13646 | -3.17237 | 1.58051  |
| H | -0.60039 | -4.10395 | 1.39475  |
| C | -0.4497  | -1.96396 | 1.52482  |
| H | 0.61742  | -1.95893 | 1.29288  |
| N | 0.26584  | -0.48498 | -1.2115  |
| O | 0.48895  | 3.32297  | 1.64904  |
| O | 0.78617  | -3.00255 | -1.23157 |
| O | 2.67889  | 2.43423  | 0.7875   |
| O | 0.33906  | 2.26912  | -1.15774 |
| O | -1.89229 | 2.45118  | -1.24753 |
| O | -3.22552 | 0.09401  | -1.03327 |
| O | -2.05119 | -1.76237 | -1.42876 |
| S | 1.52316  | 2.31815  | 1.6434   |
| H | -0.34617 | 4.17302  | -0.74424 |
| H | 1.14111  | 3.54648  | -3.37035 |
| F | 2.14785  | 2.37307  | 3.12758  |

**(R, S, R)-TS1**

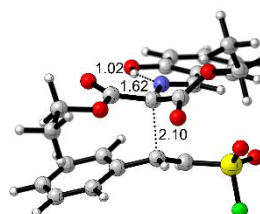

Charge=-1 Multiplicity=1

Imaginary frequency=-283.7705 cm<sup>-1</sup>

|   |         |          |          |
|---|---------|----------|----------|
| C | 2.67788 | -2.02995 | -1.37125 |
| C | 3.79125 | -2.87549 | -1.48758 |
| H | 3.62938 | -3.8895  | -1.85614 |
| C | 5.06006 | -2.42626 | -1.13551 |
| H | 5.91228 | -3.10147 | -1.23268 |
| C | 5.25063 | -1.12466 | -0.65736 |

|   |          |          |          |
|---|----------|----------|----------|
| H | 6.24569  | -0.77902 | -0.37614 |
| C | 4.15259  | -0.27951 | -0.54217 |
| H | 4.27145  | 0.73519  | -0.15485 |
| C | 2.86382  | -0.70445 | -0.89695 |
| C | 1.72148  | 0.19588  | -0.73471 |
| H | 1.92889  | 1.2073   | -0.36484 |
| C | 0.52178  | -0.02587 | 1.7841   |
| H | 1.06033  | -0.94703 | 1.9967   |
| C | -0.63273 | 0.44715  | -0.79637 |
| C | -0.78153 | 0.03782  | 1.26115  |
| H | -1.36284 | 0.94801  | 1.43413  |
| C | -0.74645 | 1.94308  | -0.7495  |
| C | 0.36305  | 3.97131  | -1.21915 |
| H | 1.42555  | 4.21071  | -1.35397 |
| H | 0.81817  | -1.7204  | -1.57453 |
| C | -0.49148 | 4.66394  | -2.26175 |
| H | -0.35867 | 5.75232  | -2.19074 |
| H | -1.55243 | 4.43032  | -2.1042  |
| C | -1.79939 | -0.28712 | -1.36363 |
| C | -4.1347  | -0.42839 | -1.53391 |
| H | -4.0864  | -1.4456  | -1.11696 |
| H | -4.12233 | -0.5175  | -2.63064 |
| C | -5.34833 | 0.32401  | -1.04257 |
| H | -6.26392 | -0.1859  | -1.36999 |
| H | -5.35716 | 1.34806  | -1.44018 |
| H | -5.35162 | 0.37555  | 0.05517  |
| C | -1.5719  | -1.21895 | 1.26529  |
| C | -2.93184 | -1.19196 | 1.60034  |
| H | -3.39851 | -0.23943 | 1.86014  |
| C | -3.68564 | -2.3654  | 1.60607  |
| H | -4.74286 | -2.32871 | 1.87517  |
| C | -3.09033 | -3.58086 | 1.26566  |
| H | -3.67931 | -4.49934 | 1.26689  |
| C | -1.73851 | -3.6141  | 0.91586  |
| H | -1.27083 | -4.55828 | 0.63192  |
| C | -0.98468 | -2.44319 | 0.9136   |
| H | 0.0588   | -2.46694 | 0.5911   |
| N | 0.54576  | -0.19043 | -1.10292 |
| O | 0.83562  | 2.54739  | 1.56699  |
| O | 1.46841  | -2.4901  | -1.70149 |
| O | 2.77203  | 1.15133  | 2.35584  |
| O | 0.28968  | 2.5487   | -1.34099 |
| O | -1.66172 | 2.55424  | -0.25212 |
| O | -2.97623 | 0.29231  | -1.11272 |

|   |          |          |          |
|---|----------|----------|----------|
| O | -1.71107 | -1.34354 | -1.94863 |
| S | 1.34101  | 1.35599  | 2.23209  |
| H | 0.06483  | 4.24657  | -0.19951 |
| H | -0.20164 | 4.34502  | -3.27253 |
| F | 0.90361  | 1.63471  | 3.78676  |

**(R, S, R)-INT2**

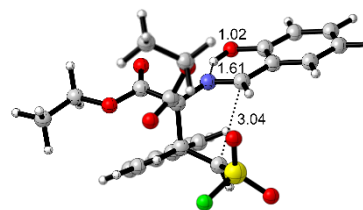

Charge = -1 Multiplicity = 1

|   |          |          |          |
|---|----------|----------|----------|
| C | 3.18563  | -1.53211 | -1.15783 |
| C | 4.46282  | -2.09697 | -1.31316 |
| H | 4.53238  | -3.10588 | -1.72174 |
| C | 5.59764  | -1.38129 | -0.95305 |
| H | 6.57975  | -1.83982 | -1.08296 |
| C | 5.49851  | -0.08563 | -0.42762 |
| H | 6.39466  | 0.46748  | -0.14666 |
| C | 4.24074  | 0.48005  | -0.26896 |
| H | 4.13397  | 1.48667  | 0.14279  |
| C | 3.07746  | -0.21962 | -0.62544 |
| C | 1.76377  | 0.39241  | -0.427   |
| H | 1.72482  | 1.39768  | 0.01335  |
| C | 0.0159   | 0.37831  | 2.05703  |
| H | 0.18483  | -0.22775 | 2.94607  |
| C | -0.60689 | 0.19573  | -0.47587 |
| C | -0.98387 | -0.11399 | 1.04708  |
| H | -1.96893 | 0.36567  | 1.15455  |
| C | -0.93127 | 1.67896  | -0.75851 |
| C | -0.22918 | 3.63491  | -1.84865 |
| H | 0.75716  | 3.96878  | -2.19217 |
| H | 1.30511  | -1.64465 | -1.33578 |
| C | -1.2965  | 3.9021   | -2.88973 |
| H | -1.34471 | 4.9786   | -3.10327 |
| H | -2.27926 | 3.574    | -2.52726 |
| C | -1.55743 | -0.65379 | -1.34549 |
| C | -3.80409 | -1.12332 | -1.83645 |
| H | -3.68078 | -2.16037 | -1.48857 |
| H | -3.60088 | -1.1058  | -2.91655 |
| C | -5.16697 | -0.56741 | -1.5035  |
| H | -5.94257 | -1.15931 | -2.00643 |
| H | -5.25045 | 0.47528  | -1.83819 |



|   |          |          |          |
|---|----------|----------|----------|
| H | -5.34821 | -0.60364 | -0.42065 |
| C | -1.17463 | -1.61115 | 1.21292  |
| C | -2.46211 | -2.15302 | 1.29079  |
| H | -3.32452 | -1.48236 | 1.27433  |
| C | -2.65262 | -3.53334 | 1.38249  |
| H | -3.66438 | -3.93779 | 1.44469  |
| C | -1.55294 | -4.39032 | 1.39644  |
| H | -1.69859 | -5.46956 | 1.46443  |
| C | -0.26338 | -3.85852 | 1.32784  |
| H | 0.60278  | -4.5224  | 1.34034  |
| C | -0.07519 | -2.4803  | 1.24052  |
| H | 0.93351  | -2.06651 | 1.18616  |
| N | 0.71369  | -0.24969 | -0.77814 |
| O | 0.52993  | 2.79985  | 1.2068   |
| O | 2.11259  | -2.23601 | -1.50817 |
| O | 1.15872  | 2.14713  | 3.53935  |
| O | -0.07345 | 2.22971  | -1.60482 |
| O | -1.89417 | 2.23574  | -0.3047  |
| O | -2.82695 | -0.31095 | -1.17282 |
| O | -1.19859 | -1.55051 | -2.06021 |
| S | 0.29081  | 1.95207  | 2.38306  |
| H | -0.45801 | 4.1186   | -0.89017 |
| H | -1.06448 | 3.3735   | -3.82449 |
| F | -1.12768 | 2.66051  | 2.92662  |

**(R, S, R)-INT3**

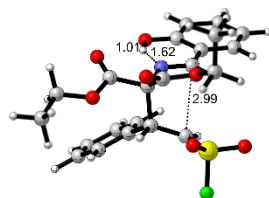

Charge=-1 Multiplicity=1

|   |          |          |          |
|---|----------|----------|----------|
| C | 3.53115  | -1.13044 | -0.74539 |
| C | 4.87734  | -1.52467 | -0.65899 |
| H | 5.13805  | -2.5345  | -0.97832 |
| C | 5.8394   | -0.6449  | -0.18028 |
| H | 6.87919  | -0.97236 | -0.12329 |
| C | 5.49411  | 0.65055  | 0.22936  |
| H | 6.256    | 1.33354  | 0.60478  |
| C | 4.16669  | 1.04792  | 0.15077  |
| H | 3.86966  | 2.0508   | 0.46737  |
| C | 3.17309  | 0.18073  | -0.33118 |
| C | 1.77823  | 0.62232  | -0.37491 |
| H | 1.54865  | 1.62005  | 0.01362  |
| C | -0.52755 | 0.02095  | -0.77812 |

|   |          |          |          |
|---|----------|----------|----------|
| C | -1.03721 | 1.35647  | -1.3478  |
| C | -0.68188 | 3.68975  | -1.36423 |
| H | -0.19376 | 4.33287  | -0.62172 |
| H | 1.73668  | -1.51011 | -1.20452 |
| C | -0.29216 | 4.05689  | -2.78021 |
| H | -0.58595 | 5.0946   | -2.98884 |
| H | -0.79909 | 3.40073  | -3.5002  |
| C | -1.16206 | -1.13192 | -1.57333 |
| C | -3.15187 | -2.29351 | -2.01829 |
| H | -2.75754 | -3.2192  | -1.57073 |
| H | -2.91352 | -2.31332 | -3.09112 |
| C | -4.63126 | -2.12575 | -1.76922 |
| H | -5.18252 | -2.95463 | -2.23179 |
| H | -4.989   | -1.18202 | -2.20219 |
| H | -4.8497  | -2.12181 | -0.69253 |
| N | 0.8868   | -0.17605 | -0.83316 |
| O | 2.62876  | -1.99075 | -1.20742 |
| O | -0.23922 | 2.36531  | -1.03459 |
| O | -2.03906 | 1.47114  | -2.00456 |
| O | -2.47761 | -1.18312 | -1.417   |
| O | -0.53731 | -1.93861 | -2.21169 |
| H | -1.76592 | 3.73479  | -1.20745 |
| H | 0.7939   | 3.9688   | -2.92021 |
| C | 0.5709   | -3.42936 | 1.8506   |
| C | -0.54004 | -4.27026 | 1.9341   |
| C | -1.80802 | -3.76074 | 1.65721  |
| C | -1.95873 | -2.42338 | 1.2872   |
| C | -0.85148 | -1.57184 | 1.18996  |
| C | 0.41669  | -2.09224 | 1.48728  |
| C | -1.03806 | -0.12699 | 0.75688  |
| C | -0.38275 | 0.84153  | 1.67361  |
| S | -1.06983 | 2.27787  | 1.98012  |
| O | -2.17242 | 2.59534  | 1.06727  |
| O | -0.13699 | 3.33538  | 2.36599  |
| F | -1.93489 | 2.16454  | 3.41361  |
| H | 1.56733  | -3.81559 | 2.07185  |
| H | -0.41749 | -5.31631 | 2.21909  |
| H | -2.68636 | -4.40458 | 1.7287   |
| H | -2.95251 | -2.02896 | 1.06499  |
| H | 1.29706  | -1.4492  | 1.43611  |
| H | -2.11534 | 0.07604  | 0.69302  |
| H | 0.52948  | 0.63186  | 2.22692  |

**(R, S, R)-TS2**

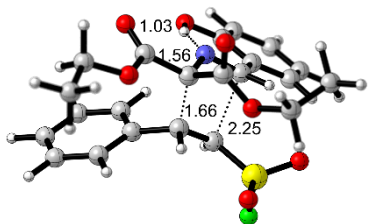

Charge=-1 Multiplicity=1

Imaginary frequency = -254.0264 cm<sup>-1</sup>

|   |          |          |          |
|---|----------|----------|----------|
| C | 2.49319  | -2.30901 | -1.20834 |
| C | 3.59326  | -3.18121 | -1.17118 |
| H | 3.44546  | -4.20937 | -1.50488 |
| C | 4.831    | -2.7377  | -0.71725 |
| H | 5.6724   | -3.43302 | -0.6951  |
| C | 5.00534  | -1.41645 | -0.28877 |
| H | 5.97602  | -1.0761  | 0.07291  |
| C | 3.92187  | -0.54489 | -0.329   |
| H | 4.01619  | 0.48633  | 0.02132  |
| C | 2.66651  | -0.96671 | -0.78621 |
| C | 1.52783  | -0.03117 | -0.7856  |
| H | 1.79909  | 1.025    | -0.67515 |
| C | -0.73847 | 0.31211  | -0.91438 |
| C | -0.63727 | 1.77264  | -1.36866 |
| C | 0.33824  | 3.87369  | -0.80576 |
| H | 0.41338  | 4.36826  | 0.16998  |
| H | 0.67811  | -1.94309 | -1.61343 |
| C | 1.64387  | 3.94029  | -1.56993 |
| H | 1.90015  | 4.98627  | -1.78639 |
| H | 1.56242  | 3.39859  | -2.52268 |
| C | -2.01844 | -0.2747  | -1.48719 |
| C | -4.36111 | -0.08983 | -1.40731 |
| H | -4.42531 | -1.10743 | -0.99175 |
| H | -4.45489 | -0.16763 | -2.50011 |
| C | -5.39919 | 0.83003  | -0.81169 |
| H | -6.40513 | 0.45855  | -1.0465  |
| H | -5.29744 | 1.84455  | -1.22009 |
| H | -5.29156 | 0.87802  | 0.28057  |
| N | 0.38685  | -0.43807 | -1.30964 |
| O | 1.31114  | -2.75551 | -1.64021 |
| O | 0.01836  | 2.51489  | -0.487   |
| O | -1.03795 | 2.17572  | -2.43119 |
| O | -3.07039 | 0.44084  | -1.0916  |
| O | -2.10047 | -1.27397 | -2.14944 |
| H | -0.4935  | 4.30798  | -1.37578 |
| H | 2.44918  | 3.49631  | -0.96843 |

|   |          |          |         |
|---|----------|----------|---------|
| C | -1.85589 | -3.4054  | 1.2416  |
| C | -3.10074 | -3.25553 | 1.85519 |
| C | -3.58904 | -1.97448 | 2.11473 |
| C | -2.83565 | -0.85441 | 1.76151 |
| C | -1.58442 | -0.99332 | 1.14917 |
| C | -1.10337 | -2.28457 | 0.89177 |
| C | -0.79152 | 0.22784  | 0.74381 |
| C | 0.60426  | 0.21125  | 1.24656 |
| S | 1.21882  | 1.59617  | 1.98895 |
| O | 0.23647  | 2.61718  | 2.31263 |
| O | 2.49292  | 2.05844  | 1.45081 |
| F | 1.68399  | 1.01252  | 3.44621 |
| H | -1.46805 | -4.40327 | 1.02943 |
| H | -3.68785 | -4.13356 | 2.12893 |
| H | -4.56114 | -1.84473 | 2.5939  |
| H | -3.22375 | 0.14753  | 1.95968 |
| H | -0.1437  | -2.41202 | 0.3862  |
| H | -1.32401 | 1.12732  | 1.07652 |
| H | 1.03668  | -0.69095 | 1.67878 |

**(R, S, R)-INT4**

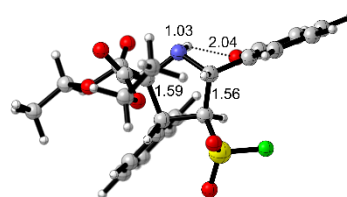

Charge=-1 Multiplicity=1

|   |          |          |          |
|---|----------|----------|----------|
| C | 2.49295  | -1.90311 | -1.29959 |
| C | 3.68131  | -2.63357 | -1.62321 |
| H | 3.5556   | -3.67146 | -1.94213 |
| C | 4.94588  | -2.06514 | -1.5377  |
| H | 5.81993  | -2.66976 | -1.79585 |
| C | 5.12154  | -0.73712 | -1.1275  |
| H | 6.11644  | -0.29593 | -1.06029 |
| C | 3.98377  | 0.00814  | -0.80738 |
| H | 4.08808  | 1.04752  | -0.47824 |
| C | 2.7058   | -0.53889 | -0.88728 |
| C | 1.5006   | 0.26635  | -0.49753 |
| H | 1.80616  | 1.30093  | -0.2824  |
| C | -0.76779 | 0.68576  | -0.83279 |
| C | -0.76914 | 2.22004  | -0.82852 |
| C | 0.12554  | 4.10444  | 0.30069  |
| H | 0.18374  | 4.34743  | 1.36752  |

|   |          |          |          |
|---|----------|----------|----------|
| H | 0.3369   | -0.68179 | -1.8418  |
| C | 1.43879  | 4.36902  | -0.40475 |
| H | 1.68062  | 5.43932  | -0.35793 |
| H | 1.37586  | 4.07451  | -1.46176 |
| C | -1.99434 | 0.19356  | -1.5845  |
| C | -4.33867 | 0.10283  | -1.47725 |
| H | -4.27548 | -0.98248 | -1.29999 |
| H | -4.45222 | 0.26464  | -2.55842 |
| C | -5.4496  | 0.74282  | -0.68184 |
| H | -6.41526 | 0.31944  | -0.9871  |
| H | -5.47399 | 1.82746  | -0.85283 |
| H | -5.30945 | 0.55588  | 0.39166  |
| N | 0.44818  | 0.28596  | -1.51448 |
| O | 1.3207   | -2.40713 | -1.36614 |
| O | -0.18251 | 2.7035   | 0.2593   |
| O | -1.17567 | 2.8868   | -1.74245 |
| O | -3.1003  | 0.68898  | -1.05083 |
| O | -1.96321 | -0.59779 | -2.48786 |
| H | -0.70364 | 4.66064  | -0.15496 |
| H | 2.24821  | 3.80499  | 0.07899  |
| C | -2.35364 | -3.35981 | 0.39382  |
| C | -3.4975  | -3.17965 | 1.17242  |
| C | -3.7212  | -1.95143 | 1.79632  |
| C | -2.80612 | -0.91197 | 1.63455  |
| C | -1.65905 | -1.0851  | 0.85194  |
| C | -1.43496 | -2.32114 | 0.23086  |
| C | -0.72491 | 0.08608  | 0.63411  |
| C | 0.77063  | -0.27977 | 0.7658   |
| S | 1.43934  | 0.36867  | 2.27778  |
| O | 0.61788  | 0.0009   | 3.4047   |
| O | 1.93886  | 1.71519  | 2.14772  |
| F | 2.7469   | -0.55711 | 2.3775   |
| H | -2.17205 | -4.31923 | -0.0936  |
| H | -4.21146 | -3.99546 | 1.29633  |
| H | -4.61008 | -1.80125 | 2.41141  |
| H | -2.98695 | 0.05189  | 2.11629  |
| H | -0.5367  | -2.46901 | -0.37919 |
| H | -1.00755 | 0.87441  | 1.34124  |
| H | 0.90948  | -1.36669 | 0.8429   |

**(R, S, R)-TS3**

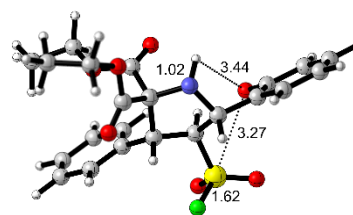

Charge = -1 Multiplicity = 1

Imaginary frequency = -41.9997 cm<sup>-1</sup>

|   |          |          |          |
|---|----------|----------|----------|
| C | -3.52639 | 0.22212  | 1.24084  |
| C | -4.7905  | 0.67287  | 1.7606   |
| H | -5.14994 | 0.16475  | 2.65945  |
| C | -5.53411 | 1.68735  | 1.17953  |
| H | -6.48679 | 1.97802  | 1.6317   |
| C | -5.08541 | 2.33833  | 0.02181  |
| H | -5.66879 | 3.13309  | -0.44409 |
| C | -3.86651 | 1.92995  | -0.51962 |
| H | -3.49106 | 2.41661  | -1.42646 |
| C | -3.09123 | 0.91635  | 0.0468   |
| C | -1.76242 | 0.63156  | -0.60641 |
| H | -1.88054 | 0.69714  | -1.70364 |
| C | -1.07699 | -0.70317 | -0.27788 |
| H | -1.19973 | -0.88634 | 0.80047  |
| C | 0.5848   | 0.97953  | -0.22427 |
| C | 0.36349  | -0.48564 | -0.73309 |
| H | 0.38485  | -0.41834 | -1.82921 |
| C | 1.53116  | 1.74303  | -1.15561 |
| C | 2.70359  | 3.77856  | -1.38931 |
| H | 2.46811  | 4.8046   | -1.08528 |
| H | -0.93471 | 1.9127   | 0.75376  |
| C | 4.12301  | 3.39747  | -1.02334 |
| H | 4.83134  | 4.06697  | -1.52953 |
| H | 4.33782  | 2.36579  | -1.33343 |
| C | 1.19667  | 0.94406  | 1.17875  |
| C | 3.19636  | 0.55269  | 2.36496  |
| H | 2.6432   | -0.22554 | 2.91041  |
| H | 3.17624  | 1.47242  | 2.96722  |
| C | 4.59869  | 0.11432  | 2.0225   |
| H | 5.15834  | -0.09144 | 2.94417  |
| H | 5.12629  | 0.89681  | 1.46052  |
| H | 4.56866  | -0.80203 | 1.41608  |
| C | 1.39135  | -1.50288 | -0.29697 |
| C | 2.46184  | -1.79979 | -1.14644 |
| H | 2.51632  | -1.30951 | -2.12034 |
| C | 3.45565  | -2.69522 | -0.75102 |

|   |          |          |          |
|---|----------|----------|----------|
| H | 4.28337  | -2.9186  | -1.42592 |
| C | 3.39163  | -3.30177 | 0.50349  |
| H | 4.16782  | -4.00239 | 0.8151   |
| C | 2.32652  | -3.01035 | 1.35765  |
| H | 2.26597  | -3.48349 | 2.33899  |
| C | 1.33081  | -2.1198  | 0.9588   |
| H | 0.50149  | -1.90777 | 1.63718  |
| N | -0.72993 | 1.6092   | -0.19759 |
| O | -3.281   | -1.93445 | -1.19611 |
| O | -2.87928 | -0.72128 | 1.79662  |
| O | -1.37137 | -3.34297 | -0.404   |
| O | 1.76239  | 2.95872  | -0.6797  |
| O | 1.98508  | 1.31295  | -2.18363 |
| O | 2.50877  | 0.80587  | 1.12952  |
| O | 0.54331  | 0.98271  | 2.18849  |
| S | -1.86972 | -2.12137 | -0.98312 |
| H | 2.52176  | 3.67225  | -2.46659 |
| H | 4.27569  | 3.48208  | 0.06128  |
| F | -1.22954 | -2.06334 | -2.46656 |

**(R, S, R)-INT5**

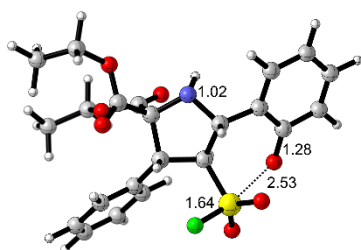

Charge=-1 Multiplicity=1

|   |          |          |          |
|---|----------|----------|----------|
| C | -3.77516 | 0.0882   | 0.79658  |
| C | -4.98292 | 0.57536  | 1.39724  |
| H | -5.55879 | -0.14355 | 1.98553  |
| C | -5.42164 | 1.88246  | 1.24932  |
| H | -6.35396 | 2.19144  | 1.73015  |
| C | -4.68915 | 2.80607  | 0.492    |
| H | -5.03249 | 3.83373  | 0.36861  |
| C | -3.50309 | 2.37285  | -0.10152 |
| H | -2.90855 | 3.07437  | -0.69494 |
| C | -3.03441 | 1.06441  | 0.03941  |
| C | -1.72927 | 0.70241  | -0.62617 |
| H | -1.85791 | 0.69211  | -1.72489 |
| C | -1.0944  | -0.63879 | -0.23009 |
| H | -1.17848 | -0.79911 | 0.84873  |
| C | 0.62432  | 0.99167  | -0.25038 |

|   |          |          |          |
|---|----------|----------|----------|
| C | 0.3502   | -0.47771 | -0.70279 |
| H | 0.36593  | -0.4489  | -1.79959 |
| C | 1.62284  | 1.68227  | -1.18277 |
| C | 2.88305  | 3.65938  | -1.45875 |
| H | 2.68612  | 4.70286  | -1.18853 |
| H | -0.86506 | 2.06847  | 0.62324  |
| C | 4.28155  | 3.23237  | -1.06419 |
| H | 5.02233  | 3.853    | -1.58598 |
| H | 4.45503  | 2.18223  | -1.33583 |
| C | 1.19127  | 0.97603  | 1.17083  |
| C | 3.13541  | 0.53049  | 2.42814  |
| H | 2.5333   | -0.21357 | 2.96941  |
| H | 3.13542  | 1.46163  | 3.01292  |
| C | 4.52796  | 0.02749  | 2.13863  |
| H | 5.05005  | -0.18191 | 3.08128  |
| H | 5.10471  | 0.77582  | 1.57838  |
| H | 4.47796  | -0.89924 | 1.54952  |
| C | 1.34389  | -1.51731 | -0.2395  |
| C | 2.43127  | -1.83552 | -1.06126 |
| H | 2.52289  | -1.34052 | -2.0298  |
| C | 3.3904   | -2.75779 | -0.64669 |
| H | 4.23071  | -2.99642 | -1.30057 |
| C | 3.27659  | -3.37453 | 0.60042  |
| H | 4.02613  | -4.09714 | 0.9267   |
| C | 2.19576  | -3.06448 | 1.4255   |
| H | 2.09452  | -3.54452 | 2.40011  |
| C | 1.23357  | -2.14391 | 1.0073   |
| H | 0.39351  | -1.92038 | 1.66777  |
| N | -0.6646  | 1.6726   | -0.29434 |
| O | -3.09312 | -1.71428 | -1.75557 |
| O | -3.396   | -1.1234  | 0.93238  |
| O | -1.91786 | -3.22401 | -0.08768 |
| O | 1.90113  | 2.8999   | -0.73715 |
| O | 2.071    | 1.20444  | -2.19197 |
| O | 2.49804  | 0.78797  | 1.16691  |
| O | 0.5083   | 1.06074  | 2.15826  |
| S | -1.96055 | -2.05448 | -0.92808 |
| H | 2.70925  | 3.52772  | -2.53456 |
| H | 4.42808  | 3.34873  | 0.01831  |
| F | -0.84222 | -2.42032 | -2.06947 |

**(R, S, R)-TS4**

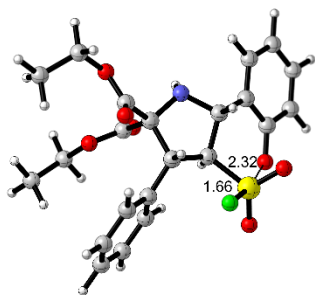

Charge=-1 Multiplicity=1

Imaginary frequency = -65.1767 cm<sup>-1</sup>

|   |          |          |          |
|---|----------|----------|----------|
| C | -3.78265 | 0.10291  | 0.7044   |
| C | -4.99003 | 0.54988  | 1.32227  |
| H | -5.59036 | -0.20653 | 1.83299  |
| C | -5.39688 | 1.87619  | 1.28631  |
| H | -6.33122 | 2.16263  | 1.77617  |
| C | -4.62854 | 2.84534  | 0.62994  |
| H | -4.94687 | 3.88777  | 0.59597  |
| C | -3.44055 | 2.44324  | 0.01913  |
| H | -2.81982 | 3.18116  | -0.49737 |
| C | -3.00651 | 1.11595  | 0.05044  |
| C | -1.70589 | 0.75195  | -0.6179  |
| H | -1.83715 | 0.73905  | -1.71612 |
| C | -1.10445 | -0.60218 | -0.21788 |
| H | -1.18199 | -0.75087 | 0.86349  |
| C | 0.64813  | 0.99214  | -0.25074 |
| C | 0.34025  | -0.47456 | -0.69494 |
| H | 0.35253  | -0.45395 | -1.79153 |
| C | 1.65549  | 1.65857  | -1.19111 |
| C | 2.95863  | 3.60585  | -1.47888 |
| H | 2.78635  | 4.65464  | -1.21241 |
| H | -0.81332 | 2.09423  | 0.635    |
| C | 4.34816  | 3.14853  | -1.08651 |
| H | 5.10149  | 3.74842  | -1.61456 |
| H | 4.49591  | 2.09296  | -1.35243 |
| C | 1.22289  | 0.9712   | 1.16716  |
| C | 3.16212  | 0.48975  | 2.41765  |
| H | 2.54944  | -0.24338 | 2.962    |
| H | 3.17904  | 1.42189  | 3.00059  |
| C | 4.54546  | -0.03657 | 2.1255   |
| H | 5.06638  | -0.25256 | 3.06732  |
| H | 5.13301  | 0.70111  | 1.56238  |
| H | 4.47891  | -0.96359 | 1.53856  |
| C | 1.31485  | -1.5303  | -0.22833 |
| C | 2.39928  | -1.86658 | -1.04689 |

|   |          |          |          |
|---|----------|----------|----------|
| H | 2.50103  | -1.37357 | -2.0154  |
| C | 3.34203  | -2.80445 | -0.63015 |
| H | 4.17985  | -3.05697 | -1.28207 |
| C | 3.21529  | -3.41925 | 0.61679  |
| H | 3.95202  | -4.15409 | 0.94498  |
| C | 2.13761  | -3.09128 | 1.43884  |
| H | 2.02585  | -3.56959 | 2.41319  |
| C | 1.19159  | -2.1549  | 1.0181   |
| H | 0.35372  | -1.91832 | 1.67673  |
| N | -0.62658 | 1.70266  | -0.2876  |
| O | -3.09678 | -1.62132 | -1.82767 |
| O | -3.42235 | -1.13113 | 0.75093  |
| O | -2.04358 | -3.17851 | -0.09143 |
| O | 1.96195  | 2.87172  | -0.75135 |
| O | 2.08914  | 1.16782  | -2.20039 |
| O | 2.52515  | 0.75506  | 1.15779  |
| O | 0.54728  | 1.07555  | 2.15796  |
| S | -2.04306 | -1.98342 | -0.90248 |
| H | 2.77879  | 3.47385  | -2.55365 |
| H | 4.50131  | 3.26784  | -0.00525 |
| F | -0.87601 | -2.40089 | -2.00684 |

**(R, S, R)-INT6**

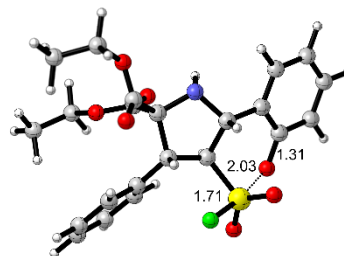

Charge=-1 Multiplicity=1

|   |         |          |          |
|---|---------|----------|----------|
| C | 3.7665  | -0.11719 | 0.62212  |
| C | 4.99305 | -0.48472 | 1.22756  |
| H | 5.60238 | 0.31657  | 1.64985  |
| C | 5.40643 | -1.80998 | 1.29007  |
| H | 6.35796 | -2.05245 | 1.76867  |
| C | 4.61939 | -2.82915 | 0.74437  |
| H | 4.94285 | -3.86959 | 0.78885  |
| C | 3.4097  | -2.48923 | 0.14044  |
| H | 2.77648 | -3.26847 | -0.29165 |
| C | 2.97281 | -1.16377 | 0.07743  |
| C | 1.663   | -0.82194 | -0.57661 |
| H | 1.785   | -0.82822 | -1.67552 |
| C | 1.10471 | 0.55122  | -0.19183 |

|   |          |          |          |
|---|----------|----------|----------|
| H | 1.16113  | 0.68534  | 0.89427  |
| C | -0.68513 | -0.99794 | -0.22273 |
| C | -0.33231 | 0.4575   | -0.68619 |
| H | -0.32711 | 0.42554  | -1.78184 |
| C | -1.68885 | -1.65951 | -1.16985 |
| C | -3.03457 | -3.57982 | -1.44402 |
| H | -2.89079 | -4.62791 | -1.15843 |
| H | 0.74085  | -2.09077 | 0.72739  |
| C | -4.41864 | -3.08435 | -1.07929 |
| H | -5.1782  | -3.67462 | -1.60925 |
| H | -4.53791 | -2.02982 | -1.36319 |
| C | -1.28592 | -0.93853 | 1.18273  |
| C | -3.23172 | -0.38432 | 2.39028  |
| H | -2.61212 | 0.34837  | 2.92742  |
| H | -3.27598 | -1.30271 | 2.99328  |
| C | -4.59967 | 0.16319  | 2.06643  |
| H | -5.12819 | 0.41303  | 2.99558  |
| H | -5.19537 | -0.57554 | 1.51334  |
| H | -4.50545 | 1.07388  | 1.45819  |
| C | -1.28778 | 1.54175  | -0.24853 |
| C | -2.36906 | 1.87245  | -1.07394 |
| H | -2.48094 | 1.35344  | -2.02767 |
| C | -3.29489 | 2.83784  | -0.68336 |
| H | -4.12977 | 3.08543  | -1.34105 |
| C | -3.1554  | 3.48657  | 0.54508  |
| H | -3.87896 | 4.24293  | 0.85314  |
| C | -2.08101 | 3.16484  | 1.37364  |
| H | -1.95809 | 3.67035  | 2.33286  |
| C | -1.15149 | 2.20084  | 0.97834  |
| H | -0.31319 | 1.97352  | 1.63942  |
| N | 0.57333  | -1.74418 | -0.21718 |
| O | 3.14256  | 1.45342  | -1.85748 |
| O | 3.39251  | 1.13857  | 0.60815  |
| O | 2.17993  | 3.12425  | -0.12765 |
| O | -2.0318  | -2.8572  | -0.71367 |
| O | -2.09371 | -1.17826 | -2.19544 |
| O | -2.58176 | -0.68992 | 1.14626  |
| O | -0.63176 | -1.04263 | 2.1882   |
| S | 2.17398  | 1.85945  | -0.84389 |
| H | -2.83653 | -3.4696  | -2.51803 |
| H | -4.59013 | -3.18325 | 0.00128  |
| F | 0.97246  | 2.3069   | -1.96823 |

**(R, S, R)-TS5**

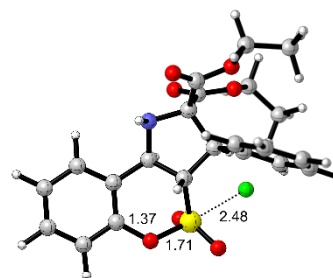

Charge = -1 Multiplicity = 1

Imaginary frequency = -87.6252 cm<sup>-1</sup>

|   |           |           |           |
|---|-----------|-----------|-----------|
| C | 3.614530  | -0.251681 | -0.481302 |
| C | 4.997200  | -0.151399 | -0.310462 |
| H | 5.541157  | 0.579128  | -0.909901 |
| C | 5.645643  | -0.962542 | 0.616816  |
| H | 6.725008  | -0.871950 | 0.746899  |
| C | 4.921220  | -1.884888 | 1.374047  |
| H | 5.427480  | -2.520379 | 2.101157  |
| C | 3.543993  | -1.991282 | 1.192787  |
| H | 2.959365  | -2.708561 | 1.771644  |
| C | 2.874109  | -1.181654 | 0.272194  |
| C | 1.396537  | -1.303298 | 0.038064  |
| H | 1.220918  | -2.065059 | -0.742617 |
| C | 0.778221  | 0.003460  | -0.483407 |
| H | 1.142427  | 0.870257  | 0.088686  |
| C | -0.783867 | -1.363232 | 0.757205  |
| C | -0.720274 | -0.199636 | -0.337320 |
| H | -1.048022 | -0.589492 | -1.312339 |
| C | -1.356403 | -2.587423 | 0.006119  |
| C | -2.982288 | -3.124843 | -1.654937 |
| H | -3.885677 | -3.641472 | -1.301818 |
| H | 0.801340  | -1.075573 | 1.987681  |
| C | -3.257695 | -2.217880 | -2.836177 |
| H | -3.571649 | -2.818688 | -3.701451 |
| H | -2.353320 | -1.636630 | -3.084528 |
| C | -1.620444 | -0.989415 | 1.978993  |
| C | -3.737431 | -0.195839 | 2.658787  |
| H | -3.145857 | 0.561146  | 3.192412  |
| H | -4.059317 | -0.955437 | 3.385903  |
| C | -4.895801 | 0.418332  | 1.909840  |
| H | -5.574253 | 0.918041  | 2.613708  |
| H | -5.459644 | -0.351562 | 1.366009  |
| H | -4.520999 | 1.160460  | 1.189364  |
| C | -1.483699 | 1.082359  | -0.105076 |
| C | -2.253110 | 1.574179  | -1.166608 |
| H | -2.195209 | 1.017767  | -2.106766 |

|   |           |           |           |
|---|-----------|-----------|-----------|
| C | -2.981078 | 2.755951  | -1.021147 |
| H | -3.579629 | 3.130963  | -1.853565 |
| C | -2.938827 | 3.464285  | 0.180792  |
| H | -3.511672 | 4.385953  | 0.296320  |
| C | -2.144623 | 2.997765  | 1.230600  |
| H | -2.090329 | 3.556431  | 2.166717  |
| C | -1.413276 | 1.818923  | 1.084683  |
| H | -0.789133 | 1.472769  | 1.912851  |
| N | 0.575756  | -1.659134 | 1.180629  |
| O | 1.842048  | -0.931792 | -2.828103 |
| O | 3.037588  | 0.628722  | -1.359255 |
| O | 1.281802  | 1.558909  | -2.717624 |
| O | -2.508995 | -2.300479 | -0.577297 |
| O | -0.770390 | -3.630877 | -0.102933 |
| O | -2.893275 | -0.826685 | 1.684662  |
| O | -1.138858 | -0.803602 | 3.068188  |
| S | 1.539482  | 0.282610  | -2.098281 |
| H | -2.217881 | -3.878663 | -1.881062 |
| H | -4.067360 | -1.513818 | -2.594269 |
| F | -0.706786 | -0.269787 | -2.992041 |

### 3a

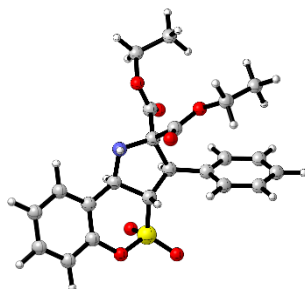

Charge = 0 Multiplicity = 1

|   |         |          |          |
|---|---------|----------|----------|
| C | 3.9621  | 0.11111  | 0.25872  |
| C | 5.27426 | -0.04521 | 0.69704  |
| H | 5.92403 | 0.82939  | 0.72675  |
| C | 5.71744 | -1.30315 | 1.09647  |
| H | 6.74384 | -1.42405 | 1.44438  |
| C | 4.85443 | -2.39915 | 1.05386  |
| H | 5.20039 | -3.38406 | 1.3678   |
| C | 3.54732 | -2.23277 | 0.60332  |
| H | 2.86442 | -3.08254 | 0.55417  |
| C | 3.07919 | -0.97823 | 0.2028   |
| C | 1.69544 | -0.78316 | -0.34357 |
| H | 1.73674 | -0.92618 | -1.43822 |

|   |          |          |          |
|---|----------|----------|----------|
| C | 1.15275  | 0.62921  | -0.10348 |
| H | 1.20033  | 0.88734  | 0.96531  |
| C | -0.62042 | -0.94532 | -0.0643  |
| C | -0.2688  | 0.49324  | -0.62633 |
| H | -0.22415 | 0.37883  | -1.7192  |
| C | -1.48678 | -1.71668 | -1.06637 |
| C | -2.72446 | -3.70604 | -1.34244 |
| H | -2.56363 | -4.72879 | -0.98426 |
| H | 0.7599   | -1.72405 | 1.2047   |
| C | -4.15088 | -3.24962 | -1.11874 |
| H | -4.84115 | -3.90643 | -1.66479 |
| H | -4.28976 | -2.222   | -1.48116 |
| C | -1.40141 | -0.79217 | 1.24385  |
| C | -3.50906 | -0.23473 | 2.13877  |
| H | -2.9849  | 0.54801  | 2.7056   |
| H | -3.61592 | -1.11603 | 2.78715  |
| C | -4.82927 | 0.24832  | 1.59247  |
| H | -5.48861 | 0.53598  | 2.42155  |
| H | -5.32345 | -0.54112 | 1.01036  |
| H | -4.67221 | 1.12367  | 0.94679  |
| C | -1.24525 | 1.59772  | -0.30159 |
| C | -2.24434 | 1.91145  | -1.22958 |
| H | -2.27681 | 1.36909  | -2.17654 |
| C | -3.19366 | 2.89158  | -0.94508 |
| H | -3.96499 | 3.12798  | -1.67951 |
| C | -3.15854 | 3.56612  | 0.27608  |
| H | -3.90111 | 4.33305  | 0.50096  |
| C | -2.16685 | 3.25739  | 1.20751  |
| H | -2.12967 | 3.78218  | 2.16321  |
| C | -1.21332 | 2.28055  | 0.9199   |
| H | -0.44785 | 2.05406  | 1.66483  |
| N | 0.64521  | -1.63741 | 0.19279  |
| O | 2.4355   | 1.3458   | -2.28336 |
| O | 3.58677  | 1.41409  | -0.05439 |
| O | 1.96768  | 3.14868  | -0.60003 |
| O | -1.81228 | -2.90127 | -0.57617 |
| O | -1.82145 | -1.29818 | -2.14304 |
| O | -2.68373 | -0.59946 | 1.01788  |
| O | -0.87426 | -0.78689 | 2.3256   |
| S | 2.2386   | 1.76852  | -0.91287 |
| H | -2.44111 | -3.64643 | -2.40114 |
| H | -4.40349 | -3.28737 | -0.05029 |

### 2am

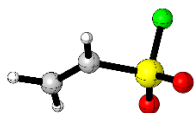

Charge = 0 Multiplicity = 1

|   |          |          |          |
|---|----------|----------|----------|
| C | -2.26308 | 0.04458  | -0.00579 |
| C | -1.17049 | -0.70942 | -0.04091 |
| S | 0.39574  | 0.0654   | -0.12876 |
| O | 0.27917  | 1.49901  | -0.11057 |
| O | 1.24618  | -0.61193 | -1.06936 |
| F | 0.96049  | -0.34101 | 1.31307  |
| H | -2.19569 | 1.13465  | -0.00389 |
| H | -1.13165 | -1.79989 | -0.05304 |
| H | -3.25025 | -0.41969 | 0.0191   |

**(S, S)-INT3-3am**

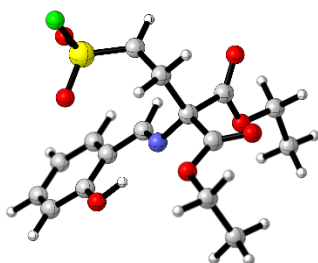

Charge = -1 Multiplicity = 1

|   |          |          |          |
|---|----------|----------|----------|
| C | -1.97137 | 1.72825  | -1.29201 |
| C | -3.12167 | 2.42631  | -1.69425 |
| H | -3.28173 | 2.58229  | -2.76182 |
| C | -4.02478 | 2.89874  | -0.74994 |
| H | -4.91202 | 3.43916  | -1.08523 |
| C | -3.8144  | 2.68792  | 0.61924  |
| H | -4.53091 | 3.05751  | 1.35266  |
| C | -2.68036 | 1.99732  | 1.02562  |
| H | -2.49688 | 1.81198  | 2.08686  |
| C | -1.74891 | 1.51683  | 0.09357  |
| C | -0.58443 | 0.7591   | 0.54227  |
| H | -0.50703 | 0.56323  | 1.62333  |
| C | 1.29163  | -0.58601 | 0.12174  |
| C | 1.88119  | -0.31396 | 1.51415  |
| C | 2.78174  | 1.34727  | 2.91312  |
| H | 3.70985  | 0.77238  | 3.04437  |
| C | 3.03384  | 2.83467  | 2.8716   |
| H | 3.49431  | 3.16004  | 3.81339  |
| H | 2.09193  | 3.38298  | 2.73581  |
| C | 2.47119  | -0.57434 | -0.84643 |
| C | 3.11642  | -0.44028 | -3.11092 |

|   |          |          |          |
|---|----------|----------|----------|
| H | 2.58883  | -0.68689 | -4.03906 |
| H | 3.82372  | -1.24579 | -2.8738  |
| C | 3.81428  | 0.90019  | -3.20547 |
| H | 4.54557  | 0.88008  | -4.02466 |
| H | 4.34519  | 1.1265   | -2.27141 |
| H | 3.08734  | 1.69859  | -3.40697 |
| N | 0.29094  | 0.34657  | -0.29541 |
| O | -1.11905 | 1.28938  | -2.21319 |
| O | 2.18628  | 0.96922  | 1.66462  |
| O | 2.06554  | -1.15022 | 2.35733  |
| O | 2.09101  | -0.41738 | -2.10485 |
| O | 3.60962  | -0.76119 | -0.49468 |
| H | 2.09767  | 1.06505  | 3.72644  |
| H | 3.71129  | 3.08871  | 2.0454   |
| H | -0.38815 | 0.8001   | -1.72292 |
| C | 0.67412  | -2.0389  | 0.09426  |
| C | -0.50218 | -2.18345 | 0.98805  |
| S | -2.00841 | -2.20186 | 0.38123  |
| O | -2.11925 | -1.61353 | -0.95485 |
| O | -3.05477 | -1.93359 | 1.36651  |
| F | -2.41377 | -3.79314 | -0.00117 |
| H | 0.40427  | -2.2292  | -0.95361 |
| H | -0.42486 | -2.42084 | 2.04618  |
| H | 1.49069  | -2.72327 | 0.36908  |

**(S, S)-TS2-3am**

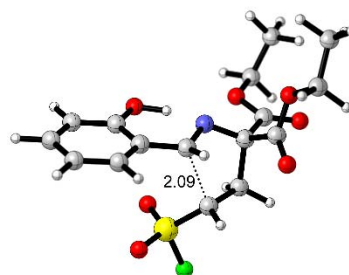

Charge = -1 Multiplicity = 1

Imaginary frequency = -273.41 cm<sup>-1</sup>

|   |         |         |          |
|---|---------|---------|----------|
| C | 2.0433  | 1.00891 | 1.72574  |
| C | 3.22468 | 1.41757 | 2.37111  |
| H | 3.35107 | 1.15132 | 3.42178  |
| C | 4.19504 | 2.14126 | 1.68709  |
| H | 5.10296 | 2.44673 | 2.21128  |
| C | 4.01846 | 2.48085 | 0.341    |
| H | 4.7816  | 3.04734 | -0.19331 |
| C | 2.8536  | 2.07853 | -0.30524 |
| H | 2.69964 | 2.31851 | -1.36091 |



|   |          |          |          |
|---|----------|----------|----------|
| C | 1.86183  | 1.35011  | 0.359    |
| C | 0.65022  | 0.89227  | -0.3581  |
| H | 0.45626  | 1.43587  | -1.29793 |
| C | -1.25339 | -0.35346 | -0.38062 |
| C | -1.9561  | 0.50255  | -1.4403  |
| C | -3.58202 | 2.17093  | -1.77689 |
| H | -4.02379 | 1.59356  | -2.60188 |
| C | -4.62912 | 2.89602  | -0.96674 |
| H | -5.17447 | 3.60083  | -1.60767 |
| H | -4.1622  | 3.45843  | -0.14708 |
| C | -2.31625 | -1.07247 | 0.43372  |
| C | -2.95915 | -1.85992 | 2.55784  |
| H | -2.38201 | -2.14182 | 3.44586  |
| H | -3.28356 | -2.76967 | 2.0356   |
| C | -4.13846 | -0.9798  | 2.91771  |
| H | -4.80646 | -1.51519 | 3.60585  |
| H | -4.70802 | -0.71146 | 2.01807  |
| H | -3.79513 | -0.06009 | 3.41053  |
| N | -0.35135 | 0.41655  | 0.38958  |
| O | 1.1211   | 0.33721  | 2.40414  |
| O | -2.89905 | 1.26742  | -0.89978 |
| O | -1.64316 | 0.55368  | -2.60335 |
| O | -2.0275  | -1.15566 | 1.72439  |
| O | -3.28569 | -1.57727 | -0.07842 |
| H | -2.84515 | 2.86146  | -2.2125  |
| H | -5.34803 | 2.1839   | -0.53952 |
| H | 0.34099  | 0.18848  | 1.72907  |
| C | -0.37345 | -1.45756 | -1.11718 |
| C | 0.90034  | -0.81078 | -1.5495  |
| S | 2.32981  | -1.51796 | -1.01217 |
| O | 2.28312  | -1.87545 | 0.39346  |
| O | 3.50808  | -0.8689  | -1.55304 |
| F | 2.37856  | -2.9973  | -1.73669 |
| H | -0.1833  | -2.24426 | -0.37326 |
| H | 1.00815  | -0.48927 | -2.58738 |
| H | -0.94553 | -1.88558 | -1.94967 |

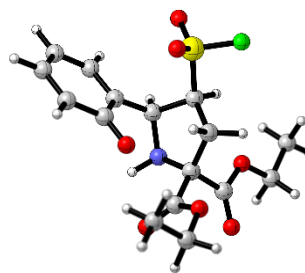

Charge = -1 Multiplicity = 1

|   |          |          |          |
|---|----------|----------|----------|
| C | 2.14542  | 1.13497  | -0.45887 |
| C | 3.49403  | 1.63017  | -0.52055 |
| H | 3.67445  | 2.6079   | -0.06613 |
| C | 4.53152  | 0.92122  | -1.10455 |
| H | 5.53654  | 1.35312  | -1.11083 |
| C | 4.31148  | -0.33544 | -1.68658 |
| H | 5.12425  | -0.89378 | -2.15201 |
| C | 3.01313  | -0.84494 | -1.66189 |
| H | 2.81095  | -1.82147 | -2.11437 |
| C | 1.94808  | -0.159   | -1.07451 |
| C | 0.57864  | -0.80725 | -1.09575 |
| H | 0.63561  | -1.66401 | -1.78503 |
| C | -1.33031 | 0.47708  | -0.34764 |
| C | -2.76805 | -0.00278 | -0.58346 |
| C | -4.12572 | -1.9158  | -0.809   |
| H | -4.459   | -1.59856 | -1.80761 |
| C | -3.97328 | -3.41417 | -0.7097  |
| H | -4.93825 | -3.9001  | -0.90355 |
| H | -3.63329 | -3.70254 | 0.29419  |
| C | -1.38898 | 1.99948  | -0.23881 |
| C | -1.74781 | 3.80125  | 1.2306   |
| H | -2.41315 | 3.92271  | 2.09372  |
| H | -2.20263 | 4.28662  | 0.35742  |
| C | -0.35862 | 4.34017  | 1.50306  |
| H | -0.39243 | 5.43261  | 1.61444  |
| H | 0.3136   | 4.06743  | 0.67907  |
| H | 0.04794  | 3.9054   | 2.4268   |
| N | -0.52497 | 0.07604  | -1.4992  |
| O | 1.21096  | 1.79318  | 0.0962   |
| O | -2.84366 | -1.32862 | -0.5495  |
| O | -3.71128 | 0.71561  | -0.79445 |
| O | -1.69418 | 2.38817  | 0.9929   |
| O | -1.26841 | 2.7349   | -1.18219 |
| H | -4.84543 | -1.52341 | -0.07643 |
| H | -3.24486 | -3.77832 | -1.44667 |
| H | -0.16871 | 0.91616  | -1.95033 |

**(S, S)-INT4-3am**

|   |          |          |         |
|---|----------|----------|---------|
| C | -0.72827 | -0.21078 | 0.89602 |
| C | 0.05127  | -1.35214 | 0.26078 |
| S | 1.35798  | -1.9744  | 1.28611 |
| O | 2.0648   | -0.95627 | 2.01767 |
| O | 2.05908  | -3.05159 | 0.63444 |
| F | 0.41716  | -2.68696 | 2.38641 |
| H | -0.03582 | 0.49033  | 1.37121 |
| H | -0.58335 | -2.23339 | 0.09393 |
| H | -1.48722 | -0.56116 | 1.60562 |

**(R, S)-INT3-3am**

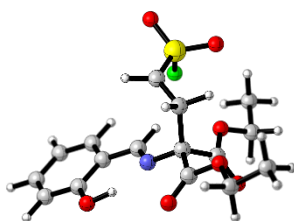

Charge = -1 Multiplicity = 1

|   |          |          |          |
|---|----------|----------|----------|
| C | 3.00931  | -2.19139 | -0.05533 |
| C | 4.35491  | -2.59315 | -0.0719  |
| H | 4.57727  | -3.64301 | -0.26684 |
| C | 5.36721  | -1.66758 | 0.15118  |
| H | 6.40638  | -2.00124 | 0.13107  |
| C | 5.07467  | -0.31902 | 0.39717  |
| H | 5.87695  | 0.39924  | 0.56546  |
| C | 3.74705  | 0.08584  | 0.42154  |
| H | 3.48253  | 1.13099  | 0.6021   |
| C | 2.70622  | -0.82986 | 0.20263  |
| C | 1.32028  | -0.36766 | 0.23771  |
| H | 1.15004  | 0.688    | 0.48608  |
| C | -1.00061 | -0.72726 | -0.066   |
| C | -1.40424 | -0.05626 | 1.25191  |
| C | -1.33084 | 1.91633  | 2.52192  |
| H | -0.98015 | 1.33329  | 3.38546  |
| C | -0.69879 | 3.28462  | 2.45287  |
| H | -1.02846 | 3.87865  | 3.31594  |
| H | -0.9911  | 3.78071  | 1.51921  |
| C | -1.89636 | -1.9614  | -0.19724 |
| C | -4.12785 | -2.65931 | -0.45399 |
| H | -4.04957 | -3.29306 | 0.44128  |
| H | -3.87282 | -3.28036 | -1.32479 |
| C | -5.49346 | -2.03003 | -0.58595 |
| H | -6.25785 | -2.81365 | -0.66697 |
| H | -5.54391 | -1.39924 | -1.48361 |

|   |          |          |          |
|---|----------|----------|----------|
| H | -5.71945 | -1.41075 | 0.29242  |
| N | 0.36295  | -1.18298 | -0.01326 |
| O | 2.05366  | -3.09133 | -0.27753 |
| O | -0.99749 | 1.19705  | 1.32328  |
| O | -1.99727 | -0.62788 | 2.13273  |
| O | -3.16669 | -1.6027  | -0.34749 |
| O | -1.51686 | -3.10161 | -0.19818 |
| H | -2.42771 | 1.97223  | 2.5848   |
| H | 0.39552  | 3.20949  | 2.46384  |
| H | 1.17172  | -2.60572 | -0.23762 |
| C | -1.26905 | 0.21231  | -1.32054 |
| C | -0.18096 | 1.11479  | -1.77879 |
| S | -0.03643 | 2.67109  | -1.34504 |
| O | -1.26912 | 3.28044  | -0.84461 |
| O | 0.81334  | 3.44621  | -2.24748 |
| F | 0.93915  | 2.80754  | 0.04778  |
| H | -2.18288 | 0.78233  | -1.10384 |
| H | 0.67656  | 0.74969  | -2.34096 |
| H | -1.51479 | -0.46932 | -2.14865 |

**(R, S)-TS2-3am**

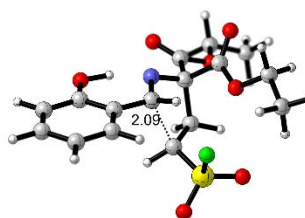

Charge = -1 Multiplicity = 1

Imaginary frequency = -348.50 cm<sup>-1</sup>

|   |          |          |          |
|---|----------|----------|----------|
| C | -2.60917 | -2.34489 | -0.18841 |
| C | -3.92266 | -2.83793 | -0.09031 |
| H | -4.05724 | -3.90173 | 0.11203  |
| C | -5.0127  | -1.98802 | -0.24472 |
| H | -6.02285 | -2.3942  | -0.1623  |
| C | -4.82764 | -0.62445 | -0.50114 |
| H | -5.68515 | 0.03939  | -0.61467 |
| C | -3.5312  | -0.12912 | -0.60564 |
| H | -3.3528  | 0.93444  | -0.78542 |
| C | -2.41855 | -0.96584 | -0.4616  |
| C | -1.05046 | -0.40668 | -0.52787 |
| H | -0.98408 | 0.57106  | -1.01882 |
| C | 1.19156  | -0.67227 | -0.17027 |
| C | 1.70326  | 0.31403  | -1.22454 |
| C | 1.53248  | 2.504    | -2.07327 |

|   |          |          |          |   |          |          |          |
|---|----------|----------|----------|---|----------|----------|----------|
| H | 1.36875  | 2.09434  | -3.0801  | C | -4.98332 | -0.52617 | -1.43112 |
| C | 0.7207   | 3.75151  | -1.8207  | H | -5.69536 | -0.16225 | -2.17257 |
| H | 1.08346  | 4.56237  | -2.46626 | C | -3.65528 | -0.08891 | -1.43733 |
| H | 0.80939  | 4.05145  | -0.7683  | H | -3.32269 | 0.63154  | -2.19178 |
| C | 2.2729   | -1.72605 | 0.02942  | C | -2.73609 | -0.54452 | -0.49779 |
| C | 4.51509  | -2.03096 | 0.68107  | C | -1.31218 | -0.07264 | -0.48897 |
| H | 4.72645  | -2.59724 | -0.23765 | H | -1.16176 | 0.66785  | -1.29113 |
| H | 4.2275   | -2.75471 | 1.4576   | C | 0.88073  | -0.74479 | -0.05663 |
| C | 5.68867  | -1.18133 | 1.10504  | C | 1.64733  | 0.20867  | -0.98632 |
| H | 6.55981  | -1.81984 | 1.30104  | C | 3.14564  | 2.02529  | -1.04194 |
| H | 5.45152  | -0.62371 | 2.0211   | H | 2.4429   | 2.46605  | -1.76226 |
| H | 5.95124  | -0.46463 | 0.31536  | C | 3.64514  | 3.04433  | -0.04617 |
| N | -0.03467 | -1.27164 | -0.54948 | H | 4.17498  | 3.8516   | -0.56821 |
| O | -1.57727 | -3.17003 | -0.03339 | H | 4.33374  | 2.58216  | 0.67394  |
| O | 1.14768  | 1.51511  | -1.10709 | C | 1.72778  | -1.98279 | 0.24163  |
| O | 2.47463  | 0.01915  | -2.10362 | C | 3.89771  | -2.8914  | 0.31113  |
| O | 3.40791  | -1.15794 | 0.43493  | H | 3.5947   | -3.74771 | -0.30758 |
| O | 2.13241  | -2.91224 | -0.10114 | H | 3.76402  | -3.17391 | 1.3648   |
| H | 2.61183  | 2.68454  | -1.96167 | C | 5.30621  | -2.43953 | 0.01409  |
| H | -0.34129 | 3.5752   | -2.03209 | H | 6.00899  | -3.25511 | 0.22749  |
| H | -0.72912 | -2.58399 | -0.18724 | H | 5.57368  | -1.57553 | 0.63698  |
| C | 0.91917  | 0.06987  | 1.22812  | H | 5.40785  | -2.15841 | -1.04262 |
| C | -0.51554 | 0.47641  | 1.28966  | N | -0.35557 | -1.16904 | -0.68308 |
| S | -0.87986 | 2.1269   | 1.39837  | O | -2.25089 | -1.89391 | 1.38721  |
| O | 0.26602  | 3.0158   | 1.49034  | O | 2.45781  | 1.00776  | -0.30657 |
| O | -2.04299 | 2.37125  | 2.2321   | O | 1.51564  | 0.23349  | -2.18    |
| F | -1.4734  | 2.51067  | -0.08929 | O | 3.01778  | -1.7917  | 0.02379  |
| H | 1.61077  | 0.91275  | 1.34692  | O | 1.24948  | -3.00789 | 0.64828  |
| H | -1.18517 | -0.04713 | 1.9726   | H | 3.96417  | 1.55653  | -1.60851 |
| H | 1.13548  | -0.6619  | 2.01796  | H | 2.79649  | 3.47562  | 0.50254  |

**(R, S)-INT4-3am**

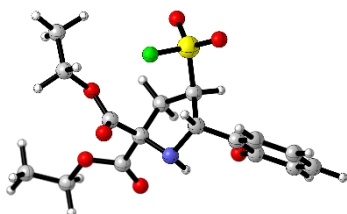

Charge = -1 Multiplicity = 1

|   |          |          |          |
|---|----------|----------|----------|
| C | -3.10329 | -1.48819 | 0.53059  |
| C | -4.47236 | -1.91097 | 0.50427  |
| H | -4.78864 | -2.6248  | 1.26945  |
| C | -5.37203 | -1.44325 | -0.44547 |
| H | -6.40572 | -1.80015 | -0.42012 |

**(R, R)-INT3-3am**

|   |          |          |          |
|---|----------|----------|----------|
| C | 0.44815  | -0.0507  | 1.26396  |
| C | -0.89381 | 0.57615  | 0.88323  |
| S | -0.84701 | 2.34587  | 0.77683  |
| O | -0.16699 | 2.95251  | 1.89404  |
| O | -2.10508 | 2.86469  | 0.30425  |
| F | 0.17068  | 2.52342  | -0.47102 |
| H | 1.1861   | 0.64872  | 1.67143  |
| H | -1.65865 | 0.39331  | 1.64998  |
| H | 0.23376  | -0.83801 | 1.99678  |

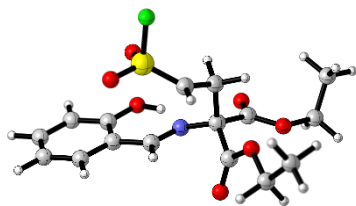

Charge = -1 Multiplicity = 1

|   |          |          |          |
|---|----------|----------|----------|
| C | 2.96789  | -1.74412 | -0.10417 |
| C | 4.33587  | -2.06074 | -0.07985 |
| H | 4.66501  | -2.87071 | 0.57231  |
| C | 5.23648  | -1.35218 | -0.86583 |
| H | 6.29549  | -1.6148  | -0.83044 |
| C | 4.80562  | -0.30824 | -1.69502 |
| H | 5.52006  | 0.24602  | -2.30355 |
| C | 3.45441  | 0.01098  | -1.72522 |
| H | 3.09318  | 0.82725  | -2.35569 |
| C | 2.52344  | -0.69325 | -0.94796 |
| C | 1.11435  | -0.30973 | -0.96568 |
| H | 0.84256  | 0.55282  | -1.59061 |
| C | -1.07388 | -0.46489 | -0.1002  |
| C | -1.6881  | 0.10678  | -1.38837 |
| C | -3.22957 | 1.62913  | -2.29456 |
| H | -3.77527 | 0.81902  | -2.79997 |
| C | -4.15313 | 2.71685  | -1.80274 |
| H | -4.69102 | 3.15954  | -2.65098 |
| H | -3.58381 | 3.50944  | -1.29863 |
| C | -1.94107 | -1.62092 | 0.40496  |
| C | -4.16492 | -2.39842 | 0.60622  |
| H | -3.73792 | -3.40443 | 0.50279  |
| H | -5.03698 | -2.30892 | -0.05118 |
| C | -4.51599 | -2.08949 | 2.04641  |
| H | -5.28249 | -2.79198 | 2.40031  |
| H | -4.91123 | -1.06846 | 2.13585  |
| H | -3.63122 | -2.18884 | 2.68917  |
| N | 0.25613  | -0.95781 | -0.27239 |
| O | 2.12431  | -2.43368 | 0.65834  |
| O | -2.55586 | 1.08006  | -1.15486 |
| O | -1.4191  | -0.29816 | -2.48957 |
| O | -3.22119 | -1.44485 | 0.09235  |
| O | -1.52021 | -2.53847 | 1.05617  |
| H | -2.47497 | 2.01105  | -2.99694 |
| H | -4.88902 | 2.30877  | -1.09695 |
| H | 1.20731  | -2.04181 | 0.50727  |
| C | -1.05629 | 0.62116  | 1.05026  |

|   |          |         |         |
|---|----------|---------|---------|
| C | -0.24526 | 1.81078 | 0.68821 |
| S | 1.22937  | 2.04722 | 1.32669 |
| O | 2.075    | 2.9591  | 0.55773 |
| O | 1.82679  | 0.84495 | 1.91005 |
| F | 1.06707  | 2.96788 | 2.72859 |
| H | -0.63839 | 0.11052 | 1.92902 |
| H | -0.62969 | 2.6378  | 0.09514 |
| H | -2.10519 | 0.87216 | 1.26478 |

**(R, R)-TS2-3am**

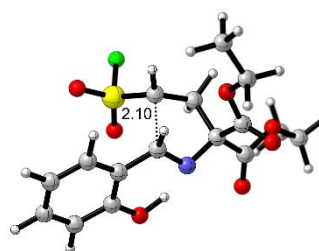

Charge = -1 Multiplicity = 1

Imaginary frequency = -274.83 cm<sup>-1</sup>

|   |          |          |          |
|---|----------|----------|----------|
| C | 2.48761  | -1.07038 | -1.4942  |
| C | 3.82735  | -1.41734 | -1.74734 |
| H | 4.03423  | -2.42507 | -2.11131 |
| C | 4.85065  | -0.49875 | -1.54206 |
| H | 5.88223  | -0.79287 | -1.74632 |
| C | 4.5714   | 0.79284  | -1.08103 |
| H | 5.37594  | 1.51108  | -0.92098 |
| C | 3.24896  | 1.14288  | -0.82664 |
| H | 3.00667  | 2.14156  | -0.45258 |
| C | 2.20089  | 0.23784  | -1.02276 |
| C | 0.80599  | 0.62002  | -0.70525 |
| H | 0.64905  | 1.70756  | -0.63909 |
| C | -1.38219 | 0.00545  | -0.45001 |
| C | -2.02109 | 1.34326  | -0.83741 |
| C | -2.06424 | 3.66295  | -0.4255  |
| H | -3.1632  | 3.68071  | -0.39922 |
| C | -1.45551 | 4.63967  | 0.55123  |
| H | -1.77812 | 5.66012  | 0.30707  |
| H | -0.35855 | 4.60059  | 0.50531  |
| C | -2.38231 | -1.09644 | -0.77631 |
| C | -4.55576 | -1.87628 | -0.26351 |
| H | -4.59913 | -2.20087 | -1.31161 |
| H | -5.48699 | -1.35557 | -0.01205 |
| C | -4.30415 | -3.04595 | 0.66581  |
| H | -5.13137 | -3.765   | 0.59389  |

|   |          |          |          |
|---|----------|----------|----------|
| H | -4.23172 | -2.70183 | 1.70668  |
| H | -3.37267 | -3.55998 | 0.39384  |
| N | -0.15858 | -0.20228 | -1.12917 |
| O | 1.52448  | -1.95593 | -1.71867 |
| O | -1.62188 | 2.34822  | -0.06198 |
| O | -2.7433  | 1.48851  | -1.79132 |
| O | -3.53023 | -0.88393 | -0.13058 |
| O | -2.16719 | -2.05546 | -1.46718 |
| H | -1.75303 | 3.86279  | -1.46088 |
| H | -1.77297 | 4.40982  | 1.57728  |
| H | 0.63866  | -1.45817 | -1.49416 |
| C | -1.04321 | -0.05681 | 1.10908  |
| C | 0.29572  | 0.56722  | 1.32713  |
| S | 1.46967  | -0.40028 | 2.04447  |
| O | 2.70518  | 0.31591  | 2.29525  |
| O | 1.51103  | -1.73734 | 1.48154  |
| F | 0.91831  | -0.69403 | 3.57056  |
| H | -1.02707 | -1.12336 | 1.37603  |
| H | 0.35465  | 1.58462  | 1.71915  |
| H | -1.8416  | 0.42957  | 1.68268  |

**(R, R)-INT4-3am**

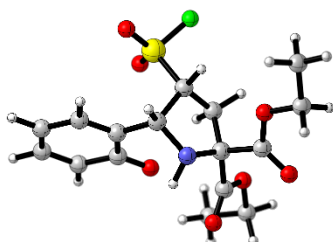

Charge = -1 Multiplicity = 1

|   |          |          |          |
|---|----------|----------|----------|
| C | -2.14541 | 1.13487  | -0.45897 |
| C | -3.49408 | 1.62993  | -0.52054 |
| H | -3.67456 | 2.60765  | -0.06613 |
| C | -4.53155 | 0.92086  | -1.10443 |
| H | -5.53661 | 1.35266  | -1.11064 |
| C | -4.31144 | -0.33579 | -1.68646 |
| H | -5.12418 | -0.89422 | -2.15181 |
| C | -3.01303 | -0.84516 | -1.66186 |
| H | -2.8108  | -1.8217  | -2.11432 |
| C | -1.948   | -0.15911 | -1.07457 |
| C | -0.57853 | -0.80728 | -1.09581 |
| H | -0.63544 | -1.66403 | -1.7851  |
| C | 1.33032  | 0.47715  | -0.34764 |
| C | 2.76809  | -0.00267 | -0.58338 |
| C | 4.12584  | -1.91562 | -0.80889 |

|   |          |          |          |
|---|----------|----------|----------|
| H | 4.84547  | -1.52321 | -0.07625 |
| C | 3.97345  | -3.41401 | -0.70963 |
| H | 4.93846  | -3.89989 | -0.90337 |
| H | 3.24513  | -3.77818 | -1.44668 |
| C | 1.38893  | 1.99955  | -0.23878 |
| C | 1.7474   | 3.80132  | 1.2307   |
| H | 2.20244  | 4.28673  | 0.35766  |
| H | 2.41248  | 3.92283  | 2.09401  |
| C | 0.35807  | 4.34009  | 1.50276  |
| H | 0.39174  | 5.43252  | 1.61429  |
| H | -0.04873 | 3.90518  | 2.42634  |
| H | -0.3139  | 4.06733  | 0.67857  |
| N | 0.52504  | 0.07608  | -1.49923 |
| O | -1.21095 | 1.79319  | 0.09598  |
| O | 2.84373  | -1.32851 | -0.5495  |
| O | 3.71133  | 0.71575  | -0.79424 |
| O | 1.69398  | 2.38823  | 0.99297  |
| O | 1.26838  | 2.73498  | -1.18215 |
| H | 4.45919  | -1.59836 | -1.80746 |
| H | 3.63336  | -3.7024  | 0.29422  |
| H | 0.16874  | 0.91618  | -1.95038 |
| C | 0.72824  | -0.2107  | 0.89599  |
| C | -0.05116 | -1.35215 | 0.26074  |
| S | -1.35788 | -1.9744  | 1.28606  |
| O | -2.05892 | -3.05168 | 0.6345   |
| O | -2.06475 | -0.95619 | 2.01749  |
| F | -0.41706 | -2.68681 | 2.38647  |
| H | 0.03564  | 0.49038  | 1.371    |
| H | 0.58352  | -2.23335 | 0.09391  |
| H | 1.48712  | -0.56095 | 1.60572  |

**(S, R)-INT3-3am**

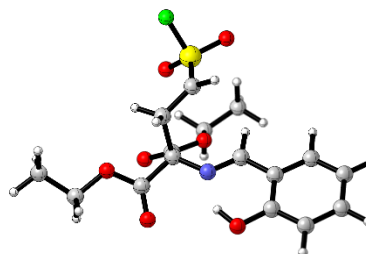

Charge = -1 Multiplicity = 1

|   |          |          |          |
|---|----------|----------|----------|
| C | -3.63888 | -1.31474 | -0.24527 |
| C | -5.03428 | -1.42147 | -0.36707 |
| H | -5.46757 | -2.41818 | -0.45927 |
| C | -5.82976 | -0.28253 | -0.3694  |

|   |          |          |          |
|---|----------|----------|----------|
| H | -6.91179 | -0.389   | -0.46682 |
| C | -5.26391 | 0.99371  | -0.24759 |
| H | -5.89586 | 1.88171  | -0.24904 |
| C | -3.8858  | 1.10808  | -0.12367 |
| H | -3.41901 | 2.09133  | -0.02506 |
| C | -3.05761 | -0.02517 | -0.12336 |
| C | -1.60805 | 0.13164  | 0.01376  |
| H | -1.21957 | 1.147    | 0.14797  |
| C | 0.58184  | -0.87452 | 0.05     |
| C | 1.16165  | -0.17907 | 1.29303  |
| C | 1.06118  | 1.73964  | 2.65015  |
| H | 2.13901  | 1.81227  | 2.46189  |
| C | 0.3858   | 3.08642  | 2.55577  |
| H | 0.78839  | 3.76071  | 3.32346  |
| H | -0.69862 | 2.99335  | 2.70911  |
| C | 1.03152  | -2.34297 | 0.15301  |
| C | 2.80958  | -3.84801 | -0.1351  |
| H | 2.17529  | -4.53874 | -0.70899 |
| H | 2.7534   | -4.14593 | 0.92201  |
| C | 4.23053  | -3.82376 | -0.64343 |
| H | 4.67308  | -4.82464 | -0.55804 |
| H | 4.83796  | -3.12175 | -0.05672 |
| H | 4.25959  | -3.51822 | -1.69797 |
| N | -0.85346 | -0.90257 | -0.02135 |
| O | -2.89784 | -2.41947 | -0.2418  |
| O | 0.49295  | 0.90644  | 1.62892  |
| O | 2.13075  | -0.58966 | 1.88039  |
| O | 2.27672  | -2.52423 | -0.26158 |
| O | 0.33075  | -3.2319  | 0.5616   |
| H | 0.90124  | 1.25296  | 3.62385  |
| H | 0.57178  | 3.52024  | 1.56338  |
| H | -1.93607 | -2.12568 | -0.14616 |
| C | 1.21447  | -0.20979 | -1.23915 |
| C | 0.75207  | 1.17377  | -1.52816 |
| S | 1.60253  | 2.45374  | -1.02223 |
| O | 2.55837  | 2.13678  | 0.04474  |
| O | 0.84032  | 3.70224  | -0.94944 |
| F | 2.6981   | 2.90122  | -2.22022 |
| H | 2.30304  | -0.26268 | -1.1055  |
| H | -0.08335 | 1.40747  | -2.18369 |
| H | 0.96166  | -0.88407 | -2.07111 |

**(S, R)-TS2-3am**

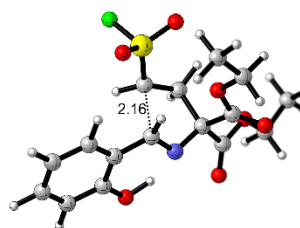

Charge = -1 Multiplicity = 1

Imaginary frequency = -282.75 cm<sup>-1</sup>

|   |          |          |          |
|---|----------|----------|----------|
| C | -2.52846 | -2.4123  | 0.12851  |
| C | -3.81567 | -2.95842 | -0.0214  |
| H | -3.89744 | -4.02087 | -0.2564  |
| C | -4.94563 | -2.16121 | 0.12624  |
| H | -5.93442 | -2.60798 | 0.00389  |
| C | -4.82704 | -0.79932 | 0.42724  |
| H | -5.71596 | -0.17728 | 0.53642  |
| C | -3.55725 | -0.25119 | 0.58211  |
| H | -3.42814 | 0.8139   | 0.7904   |
| C | -2.40428 | -1.03317 | 0.44184  |
| C | -1.06702 | -0.41524 | 0.56384  |
| H | -1.06583 | 0.56568  | 1.05217  |
| C | 1.20694  | -0.6218  | 0.21407  |
| C | 1.70434  | 0.37347  | 1.265    |
| C | 1.2767   | 2.48933  | 2.24164  |
| H | 2.21579  | 2.97386  | 1.93492  |
| C | 0.12214  | 3.46298  | 2.27125  |
| H | 0.35182  | 4.29302  | 2.95249  |
| H | -0.79196 | 2.96456  | 2.62342  |
| C | 2.29458  | -1.67269 | 0.02949  |
| C | 4.51905  | -1.98997 | -0.67059 |
| H | 4.22403  | -2.76676 | -1.39113 |
| H | 4.76223  | -2.4925  | 0.27695  |
| C | 5.66836  | -1.15324 | -1.17862 |
| H | 6.54455  | -1.79054 | -1.35513 |
| H | 5.93862  | -0.38299 | -0.44384 |
| H | 5.40013  | -0.65963 | -2.12243 |
| N | -0.0181  | -1.23074 | 0.57057  |
| O | -1.45885 | -3.1899  | -0.0146  |
| O | 0.96411  | 1.47462  | 1.28005  |
| O | 2.6131   | 0.16662  | 2.03068  |
| O | 3.40537  | -1.11846 | -0.45257 |
| O | 2.17599  | -2.8506  | 0.23845  |
| H | 1.44812  | 2.01201  | 3.21644  |
| H | -0.06208 | 3.85719  | 1.26391  |
| H | -0.64407 | -2.57092 | 0.17659  |

|   |          |         |          |   |          |          |          |
|---|----------|---------|----------|---|----------|----------|----------|
| C | 0.9487   | 0.11943 | -1.20508 | N | -0.00591 | -1.03353 | -1.00077 |
| C | -0.46779 | 0.55846 | -1.26731 | O | 1.52277  | -2.4969  | 0.93713  |
| S | -0.7942  | 2.21294 | -1.22112 | O | -1.20367 | 1.70175  | -0.91598 |
| O | 0.37721  | 3.05729 | -1.06074 | O | -2.69641 | 0.40868  | -1.96435 |
| O | -1.9854  | 2.54524 | -0.45392 | O | -3.3474  | -1.31346 | 0.33797  |
| F | -1.2947  | 2.54916 | -2.74829 | O | -2.04007 | -2.84189 | -0.64273 |
| H | 1.66243  | 0.94499 | -1.31901 | H | -1.55165 | 2.59554  | -2.74622 |
| H | -1.18644 | 0.04984 | -1.91112 | H | -0.92055 | 4.21599  | -0.19838 |
| H | 1.16652  | -0.6292 | -1.97818 | H | 0.19148  | -1.97159 | -0.63866 |

**(S, R)-INT4-3am**

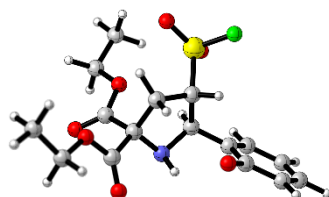

Charge = -1 Multiplicity = 1

|   |          |          |          |   |          |          |         |
|---|----------|----------|----------|---|----------|----------|---------|
| C | 2.51769  | -2.06784 | 0.26507  | C | -0.7995  | -0.146   | 1.0948  |
| C | 3.80198  | -2.70308 | 0.2466   | C | 0.66275  | 0.26108  | 0.92193 |
| H | 3.91834  | -3.60979 | 0.84617  | S | 0.94443  | 2.02018  | 1.19279 |
| C | 4.86428  | -2.19973 | -0.49428 | O | -0.18995 | 2.70273  | 1.76802 |
| H | 5.82392  | -2.72436 | -0.47236 | O | 1.70684  | 2.6318   | 0.13075 |
| C | 4.73203  | -1.03686 | -1.2647  | F | 1.99344  | 1.89559  | 2.40901 |
| H | 5.57116  | -0.64647 | -1.84151 | H | -1.43971 | 0.63924  | 1.51307 |
| C | 3.49255  | -0.38917 | -1.27349 | H | 1.3017   | -0.22604 | 1.66557 |
| H | 3.35887  | 0.5253   | -1.8605  | H | -0.82477 | -1.02136 | 1.75511 |
| C | 2.41366  | -0.87545 | -0.54219 |   |          |          |         |
| C | 1.08643  | -0.17442 | -0.52623 |   |          |          |         |
| H | 1.13666  | 0.72407  | -1.1556  |   |          |          |         |
| C | -1.21784 | -0.59228 | -0.3309  |   |          |          |         |
| C | -1.81718 | 0.5463   | -1.15614 |   |          |          |         |
| C | -1.65699 | 2.83569  | -1.67891 |   |          |          |         |
| H | -2.72761 | 2.97434  | -1.47237 |   |          |          |         |
| C | -0.83971 | 4.03889  | -1.279   |   |          |          |         |
| H | -1.20968 | 4.92237  | -1.8158  |   |          |          |         |
| H | 0.21958  | 3.89053  | -1.52292 |   |          |          |         |
| C | -2.23659 | -1.7201  | -0.25969 |   |          |          |         |
| C | -4.39354 | -2.28378 | 0.49143  |   |          |          |         |
| H | -4.0021  | -3.12896 | 1.07542  |   |          |          |         |
| H | -4.66488 | -2.66197 | -0.50456 |   |          |          |         |
| C | -5.55356 | -1.60546 | 1.17791  |   |          |          |         |
| H | -6.37552 | -2.32065 | 1.31053  |   |          |          |         |
| H | -5.91797 | -0.76153 | 0.57711  |   |          |          |         |
| H | -5.25339 | -1.23153 | 2.16591  |   |          |          |         |

## 6. References.

1. G. F. Zha, Q. Zheng, J. Leng, P. Wu, H. L. Qin and K. B. Sharpless, Palladium-Catalyzed Fluorosulfonylvinylation of Organic Iodides, *Angew. Chem. Int. Ed.* **2017**, *56*, 4849-4852.
2. L. Tian, G.-Q. Xu, Y.-H. Li, Y.-M. Liang and P.-F. Xu, An efficient strategy for the synthesis of polysubstituted chromeno[4,3-*b*]pyrrolidine derivatives, *Chem. Commun.*, **2014**, *50*, 2428-2430.
3. Ayerbe, M.; Arrieta, A.; Cossío, F. P.; Linden, A. Stereocontrolled Synthesis of Highly Substituted Proline Esters via [3+2] Cycloaddition between *N*-Metalated Azomethine Ylides and Nitroalkenes. Origins of the Metal Effect on the Stereochemical Outcome. *J. Org. Chem.* **1998**, *63* (6), 1795-1805.
4. García-Valle, F. M.; Taberero, V.; Cuenca, T.; Mosquera, M. E. G.; Cano, J., Intramolecular C–F Activation in Schiff-Base Alkali Metal Complexes. *Organometallics* **2019**, *38*, 894-904.
5. Costa, M.; Proença, F., 2-Aryl-1,9-dihydrochromeno[3,2-*d*]imidazoles: a facile synthesis from salicylaldehydes and arylideneaminoacetonitrile. *Tetrahedron* **2011**, *67*, 1799-1804.
6. Ghandi, M.; Bozcheloei, A. H.; Nazari, S. H.; Sadeghzadeh, M. Solvent-Dependent Reactions for the Synthesis of  $\beta$ -Keto-Benzo- $\delta$ -Sultone Scaffolds via DBU-Catalyzed O-Sulfonylation/Intramolecular Baylis–Hillman/1,3-H Shift or Dehydration Tandem Sequences. *J. Org. Chem.* **2011**, *76* (24), 9975-9982.
7. Zhang, Y.; Jermaks, J.; MacMillan, S. N.; Lambert, T. H. Synthesis of 2H-Chromenes via Hydrazine-Catalyzed Ring-Closing Carbonyl-Olefin Metathesis. *ACS Catal.* **2019**, *9* (10), 9259-9264.
8. Hajra, S.; Sinha, D. Catalytic Enantioselective Aziridoarylation of Aryl Cinnamyl Ethers toward Synthesis of trans-3-Amino-4-arylchromans. *J. Org. Chem.* **2011**, *76* (18), 7334-7340.
9. Gaussian 16, Revision A.03, M. J. Frisch, G. W. Trucks, H. B. Schlegel, G. E. Scuseria, M. A. Robb, J. R. Cheeseman, G. Scalmani, V. Barone, G. A. Petersson, H. Nakatsuji, X. Li, M. Caricato, A. V. Marenich, J. Bloino, B. G. Janesko, R. Gomperts, B. Mennucci, H. P. Hratchian, J. V. Ortiz, A. F. Izmaylov, J. L. Sonnenberg, D. Williams-Young, F. Ding, F. Lipparini, F. Egidi, J. Goings, B. Peng, A. Petrone, T. Henderson, D. Ranasinghe, V. G. Zakrzewski, J. Gao, N. Rega, G. Zheng, W. Liang, M. Hada, M. Ehara, K. Toyota, R. Fukuda, J. Hasegawa, M. Ishida, T. Nakajima, Y. Honda, O. Kitao, H. Nakai, T. Vreven, K. Throssell, J. A. Montgomery, Jr., J. E. Peralta, F. Ogliaro, M. J. Bearpark, J. J. Heyd, E. N. Brothers, K. N. Kudin, V. N. Staroverov, T. A. Keith, R. Kobayashi, J. Normand, K. Raghavachari, A. P. Rendell, J. C. Burant, S. S. Iyengar, J. Tomasi, M. Cossi, J. M. Millam, M. Klene, C. Adamo, R. Cammi, J. W. Ochterski, R. L. Martin, K. Morokuma, O. Farkas, J. B. Foresman, and D. J. Fox, Gaussian, Inc., Wallingford CT, 2016.
10. (a) Y. Zhao and D. G. Truhlar, The M06 suite of density functionals for main group thermochemistry, thermochemical kinetics, noncovalent interactions, excited states, and transition elements: two new functionals and systematic testing of four M06-class functionals and 12 other functionals, *Theor. Chem. Acc.* **2008**, *120*, 215-241; (b) Y.



Zhao and D. G. Truhlar, Density Functionals with Broad Applicability in Chemistry, *Acc. Chem. Res.* **2008**, *41*, 157-167.

11. (a) Weigend, F.; Ahlrichs, R. Balanced basis sets of split valence, triple zeta valence and quadruple zeta valence quality for H to Rn: Design and assessment of accuracy. *Phys. Chem. Chem. Phys.* **2005**, *7* (18), 3297-3305.; (b) Weigend, F. Accurate Coulomb-fitting basis sets for H to Rn. *Phys. Chem. Chem. Phys.* **2006**, *8* (9), 1057-1065.

12. (a) Mennucci, B.; Tomasi, J. Continuum solvation models: A new approach to the problem of solute's charge distribution and cavity boundaries. *J. Chem. Phys.* **1997**, *106* (12), 5151-5158; (b) Barone, V.; Cossi, M. Quantum Calculation of Molecular Energies and Energy Gradients in Solution by a Conductor Solvent Model. *J. Phys. Chem. A* **1998**, *102* (11), 1995-2001.

13. (a) Fukui, K. Formulation of the reaction coordinate. *J. Phys. Chem.* **2002**, *74* (23), 4161-4163.; (b) Fukui, K. The path of chemical reactions - the IRC approach. *Acc. Chem. Res.* **2002**, *14* (12), 363-368.

14. (a) A. V. Marenich, C. J. Cramer and D. G. Truhlar, Universal Solvation Model Based on Solute Electron Density and on a Continuum Model of the Solvent Defined by the Bulk Dielectric Constant and Atomic Surface Tensions, *J. Phys. Chem. B* **2009**, *113*, 6378-6396; (b) E. Engelage, N. Schulz, F. Heinen, S. M. Huber, D. G. Truhlar and C. J. Cramer, Refined SMD Parameters for Bromine and Iodine Accurately Model Halogen-Bonding Interactions in Solution, *Chem. Eur. J.* **2018**, *24*, 15983-15987.

15. T. Lu and Q. Chen, Shermo: A general code for calculating molecular thermochemistry properties, *Comput. Theor. Chem.* **2021**, *1200*, 113249.

16. CYLview, 1.0b; Legault, C. Y., Université de Sherbrooke, 2009; (<http://www.cylview.org>).

## 7. Copies of NMR spectra.

7.585  
7.570  
7.566  
7.562  
7.406  
7.404  
7.335  
7.332  
7.327  
7.322  
7.320  
7.308  
7.305  
7.300  
7.289  
7.287  
7.270  
7.267  
7.156  
7.154  
7.135  
7.133  
5.015  
4.984  
4.461  
4.443  
4.434  
4.416  
4.309  
4.292  
4.282  
4.265  
3.840  
3.829  
3.822  
3.814  
3.799  
3.796  
3.770  
3.362  
3.345  
3.336  
3.318  
1.340  
1.322  
1.304  
0.751  
0.733  
0.715

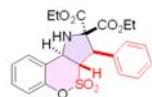

3a

<sup>1</sup>H NMR (400 MHz, Chloroform-d)

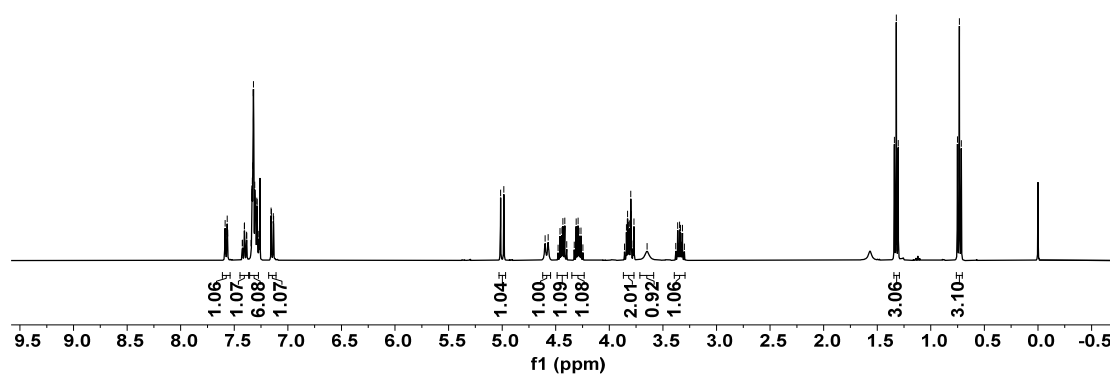

169.52  
168.78  
150.75  
133.94  
130.23  
128.74  
128.57  
128.43  
125.86  
125.81  
123.66  
118.22  
77.48  
77.16  
76.84  
64.74  
62.91  
62.90  
60.75  
51.47  
14.10  
13.33

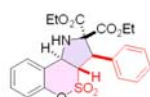

3a

<sup>13</sup>C NMR (100 MHz, Chloroform-d)

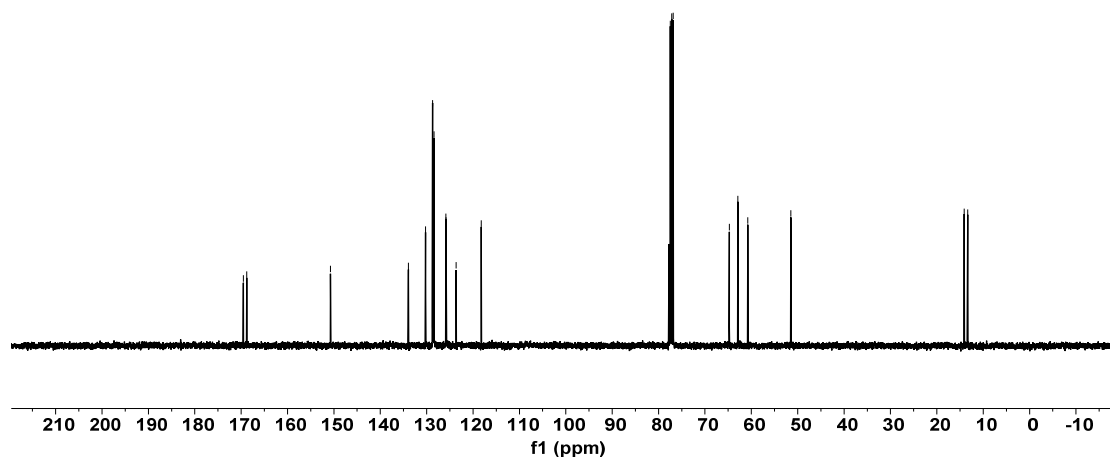

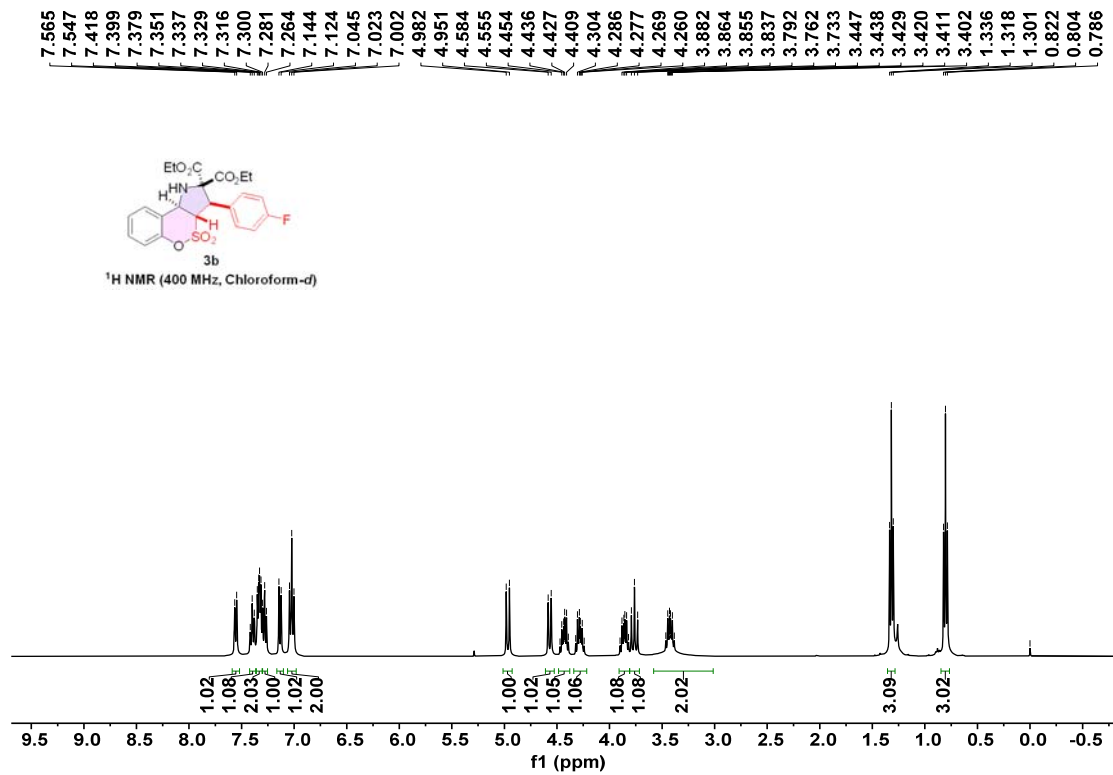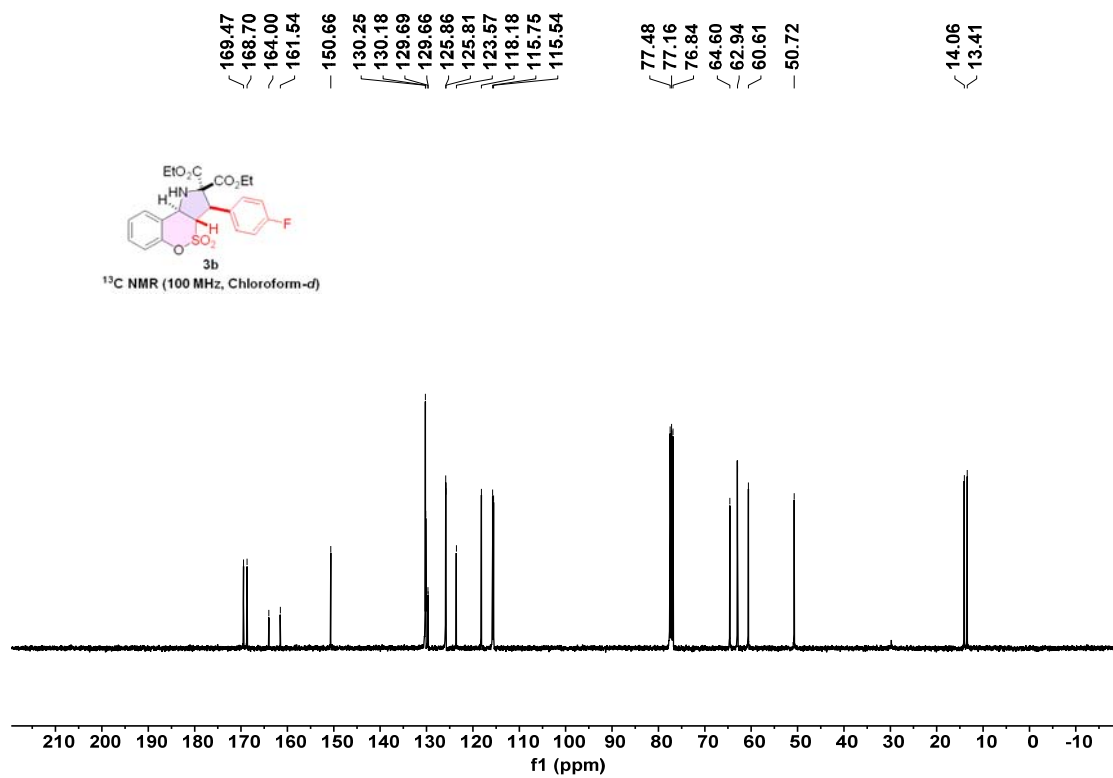

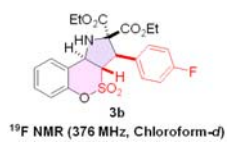

-113.333

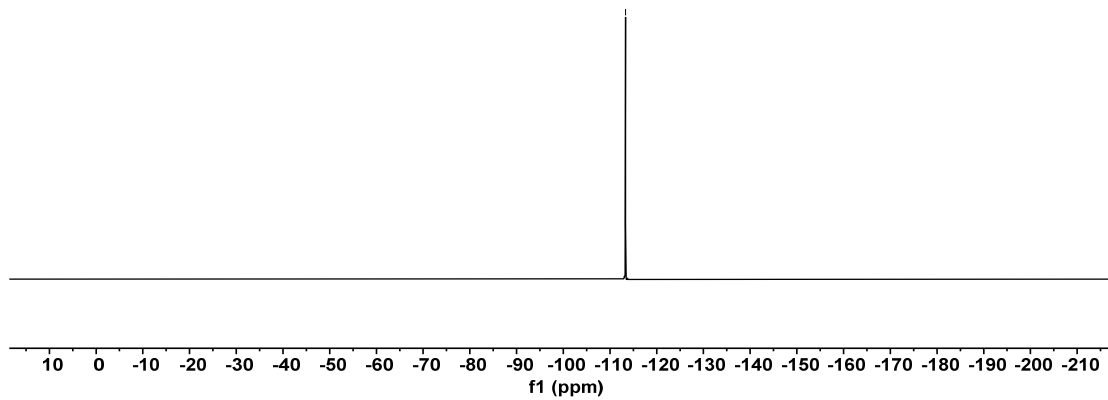

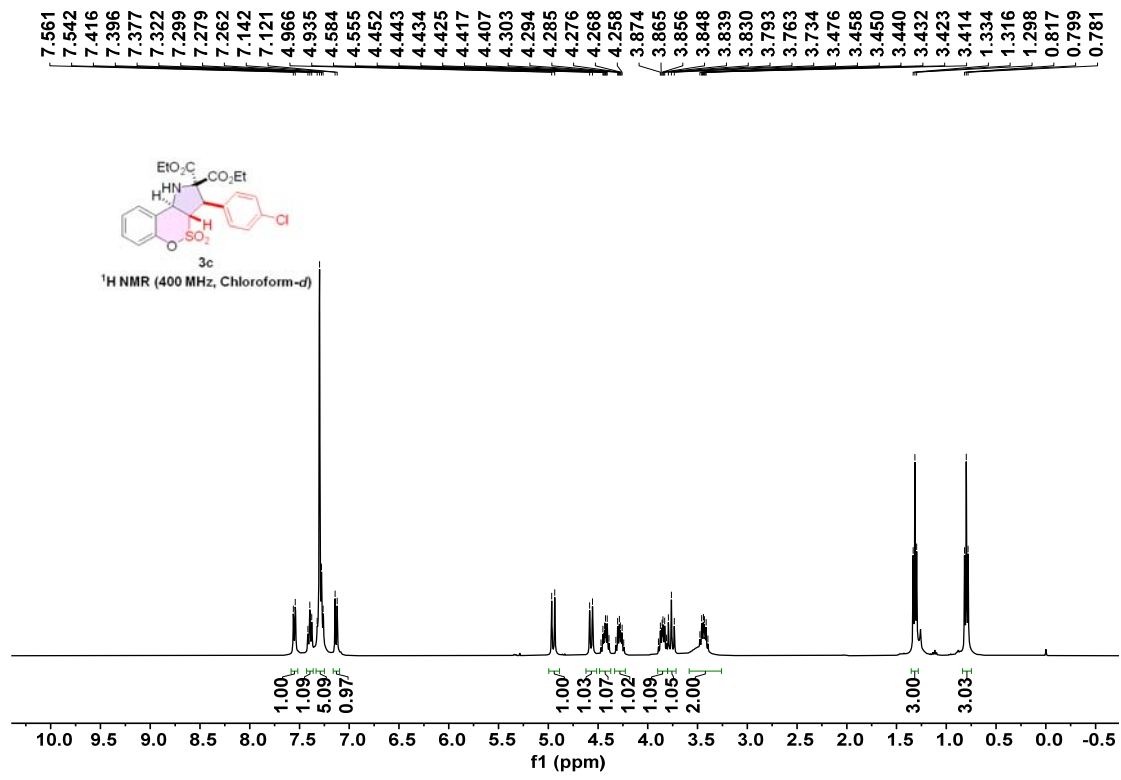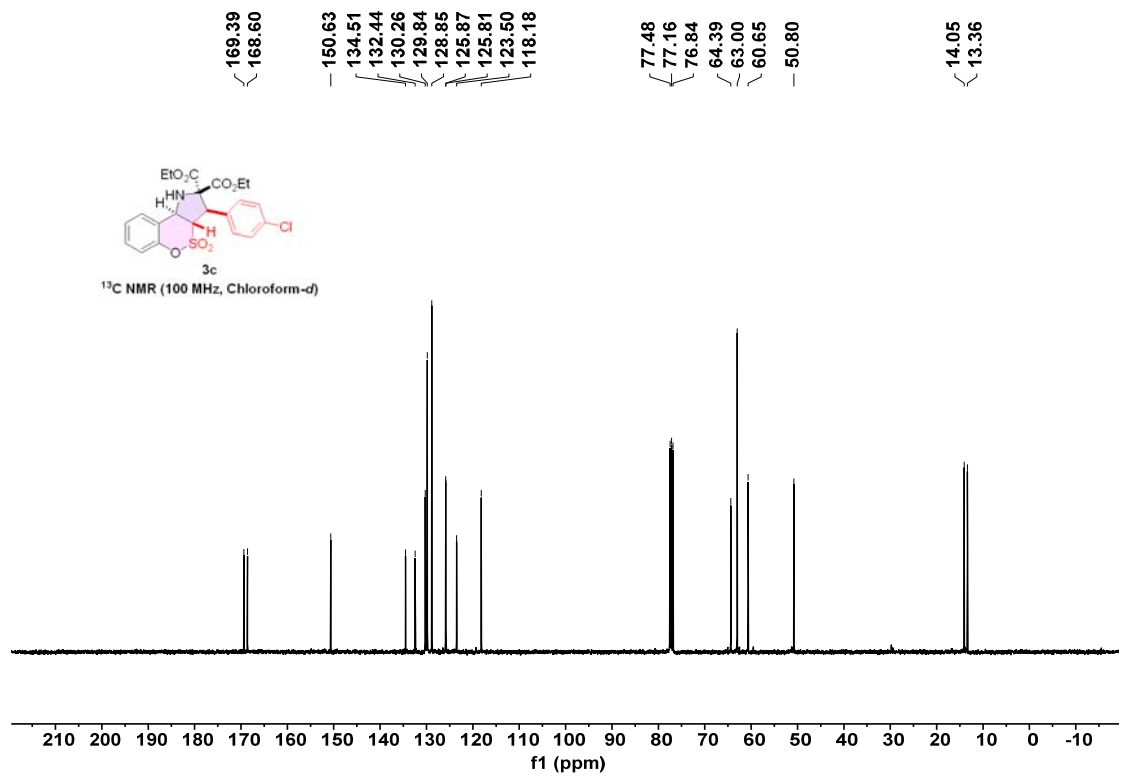

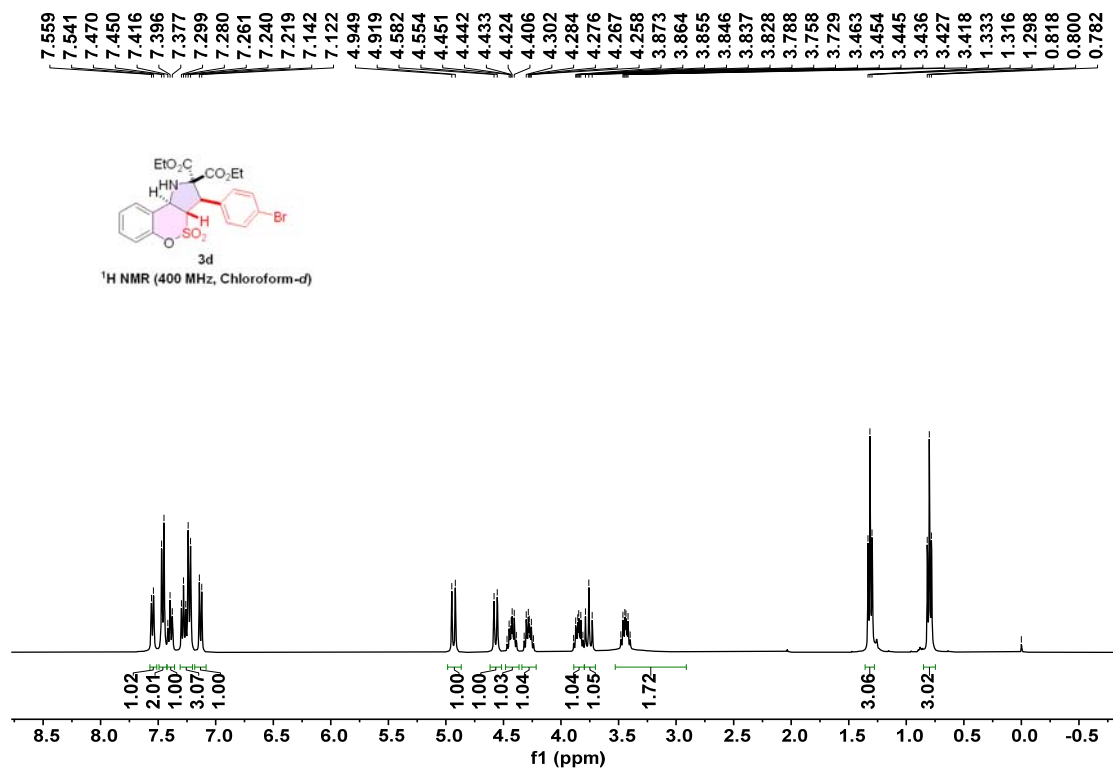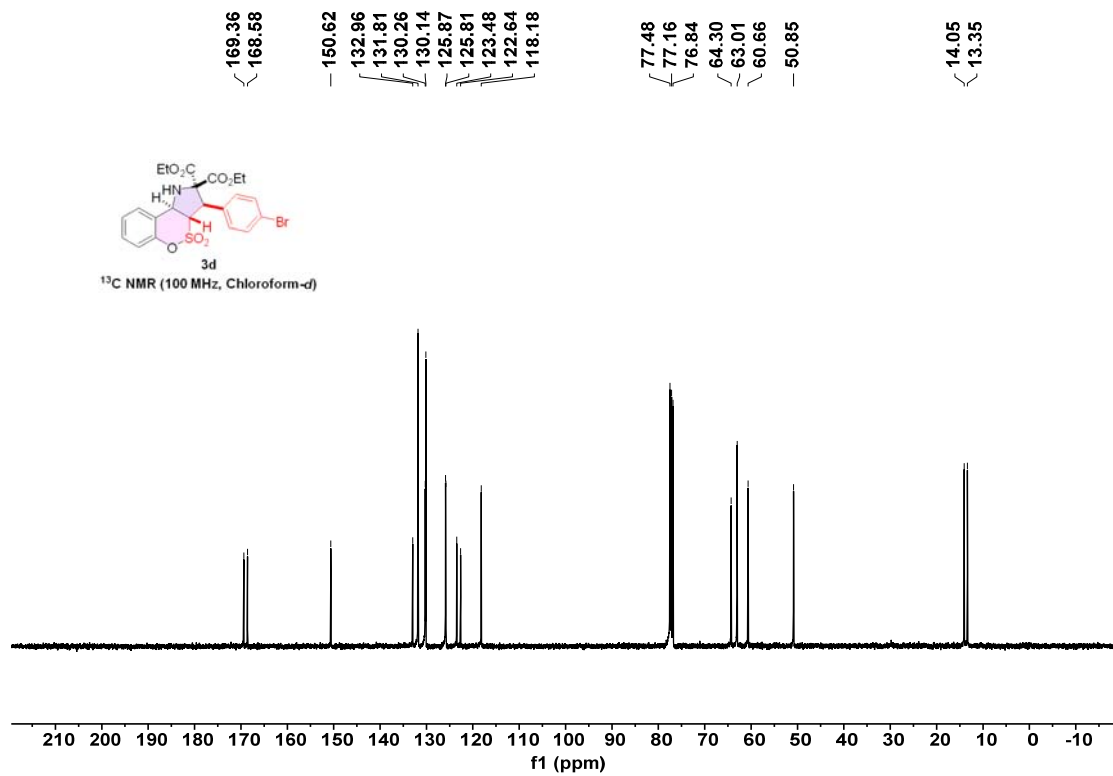

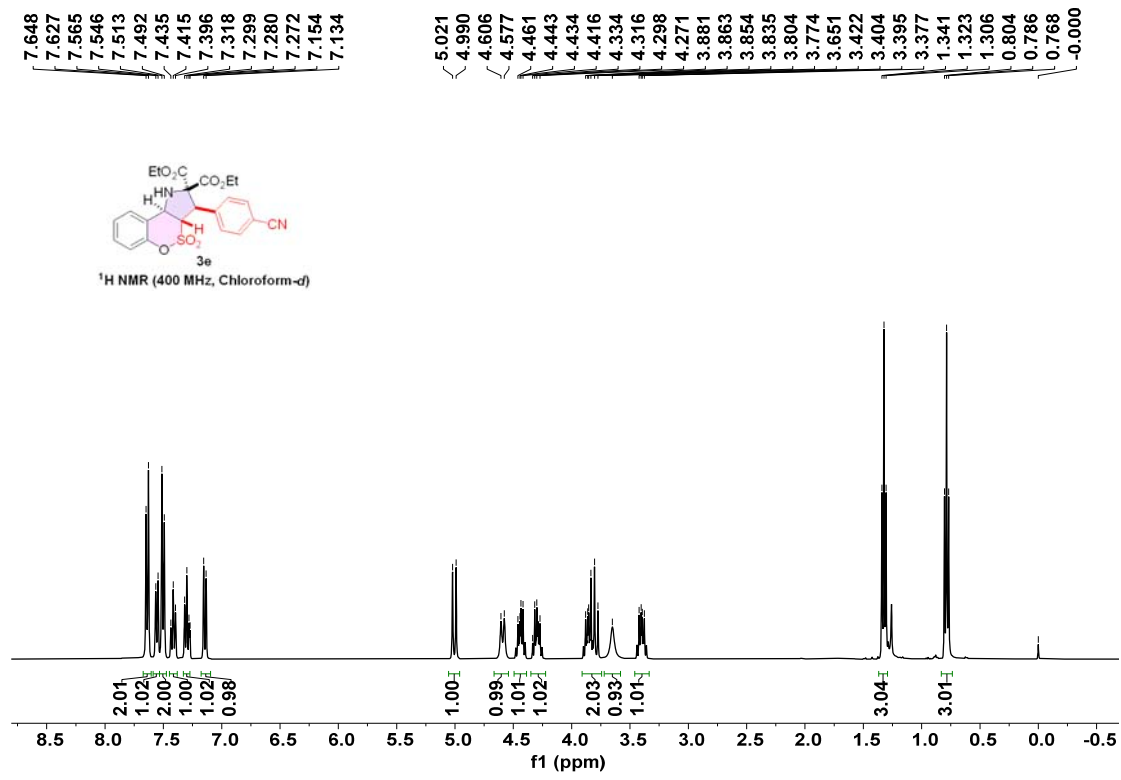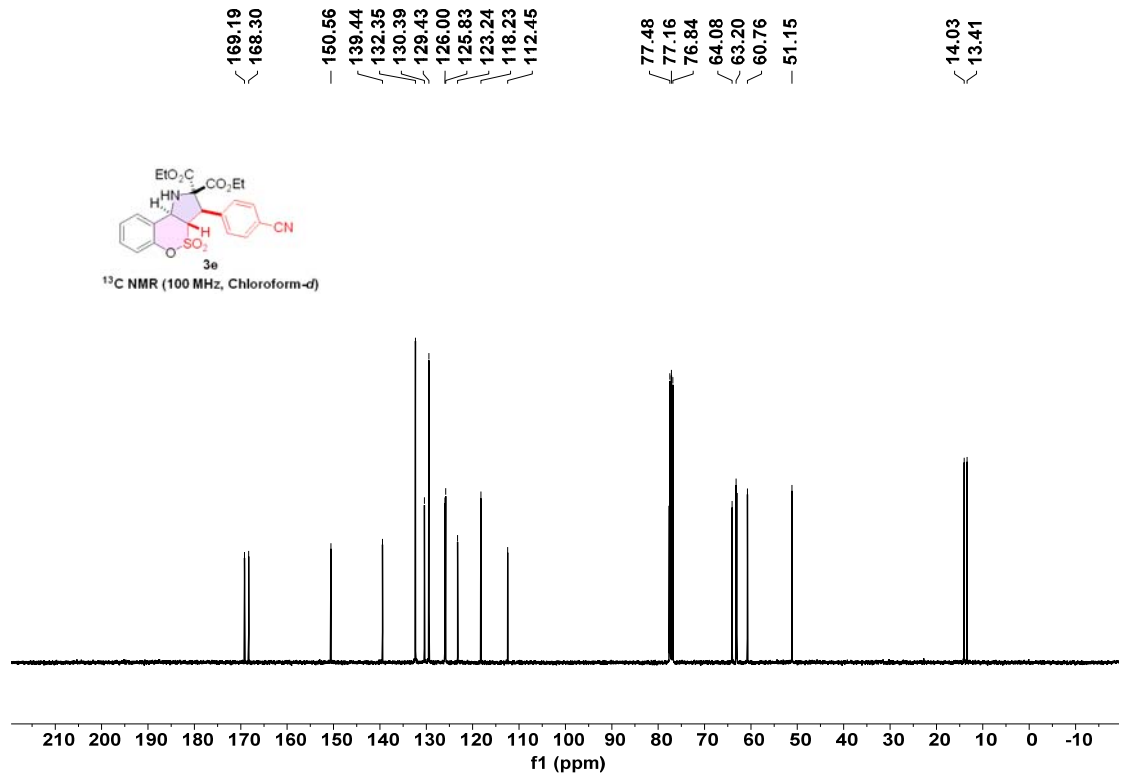

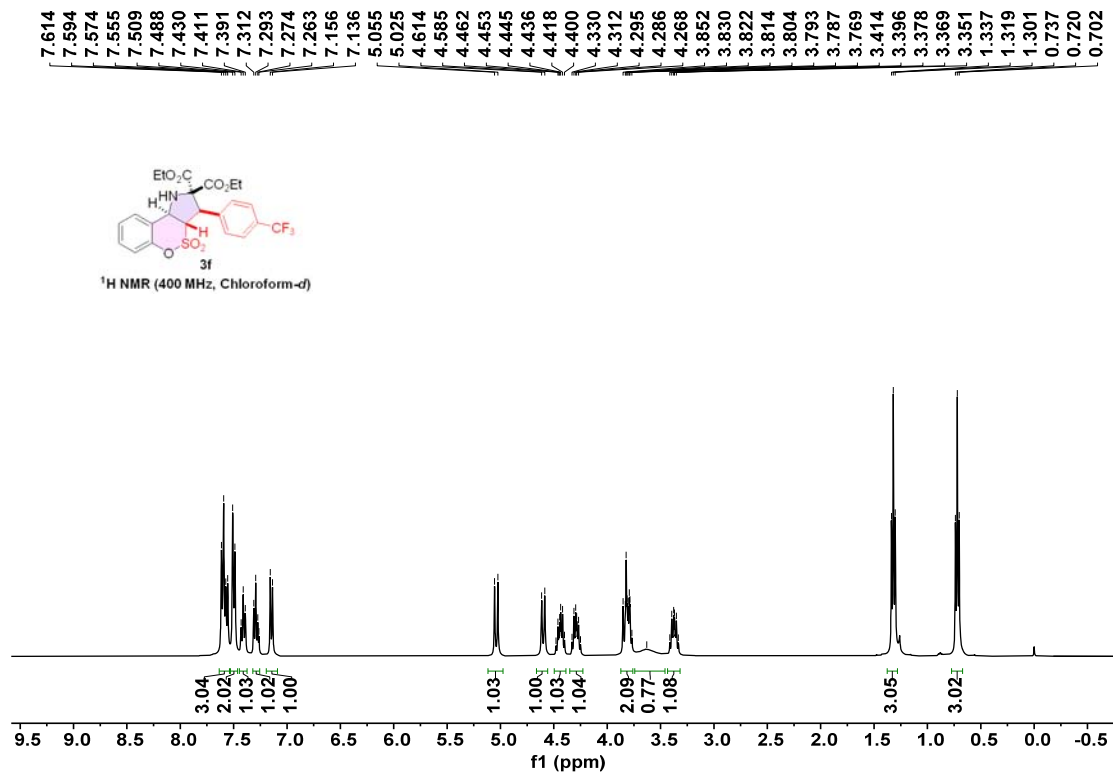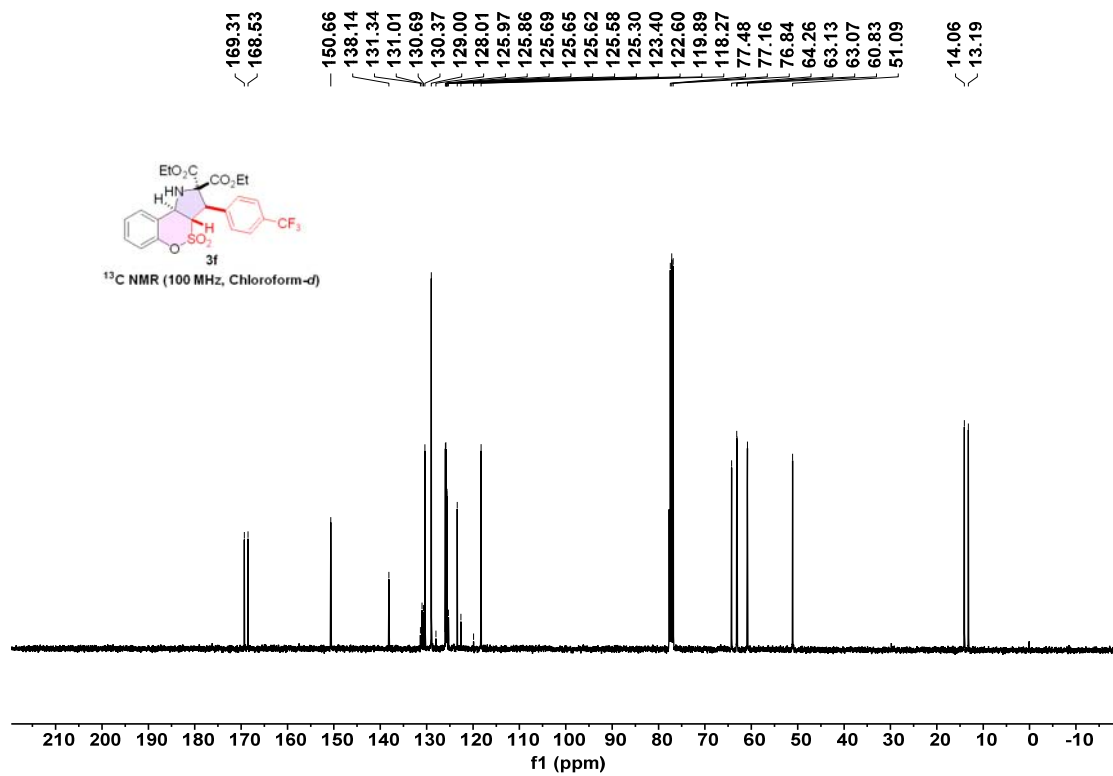



-62.820

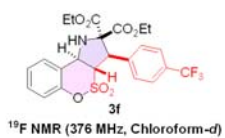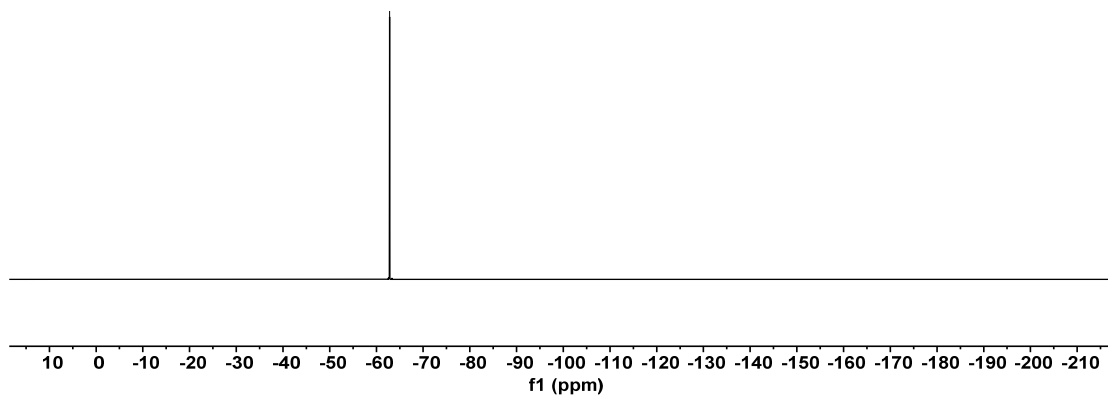

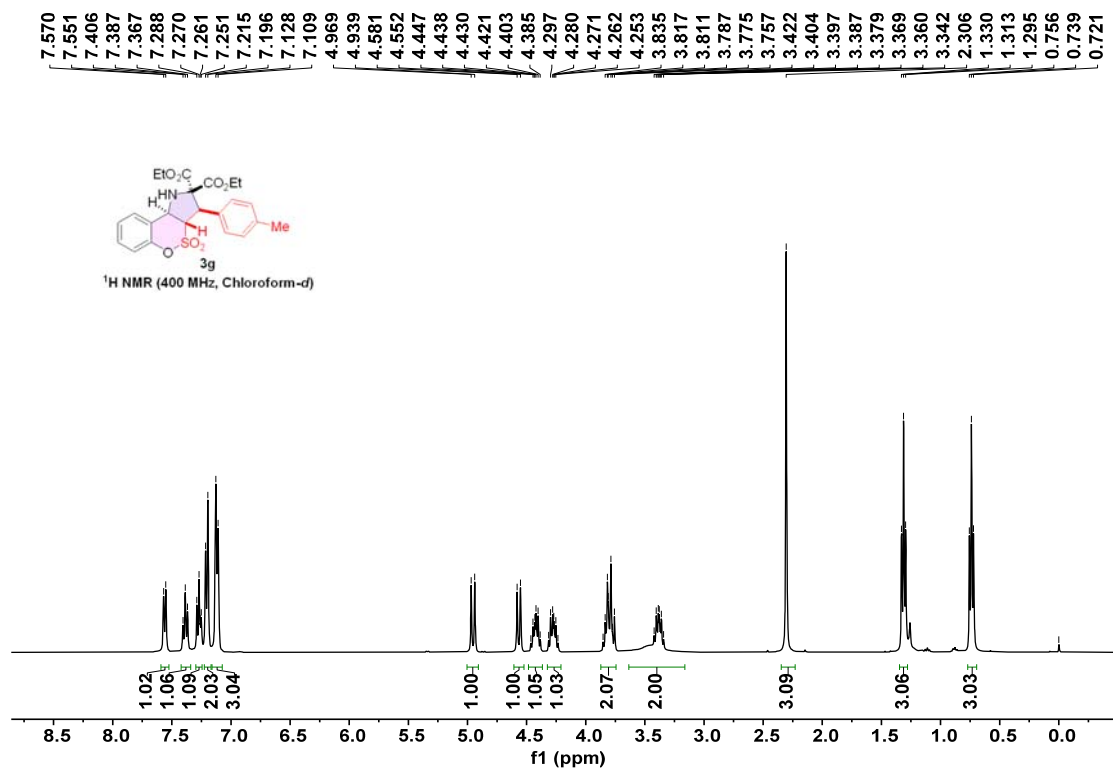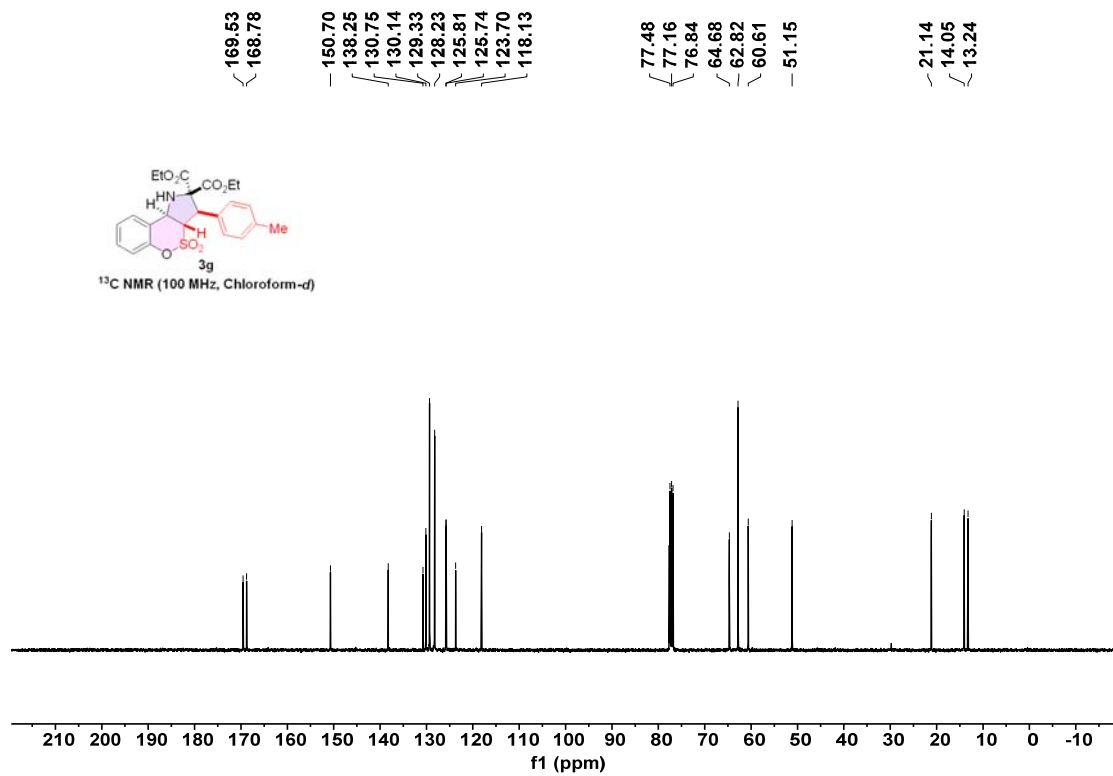

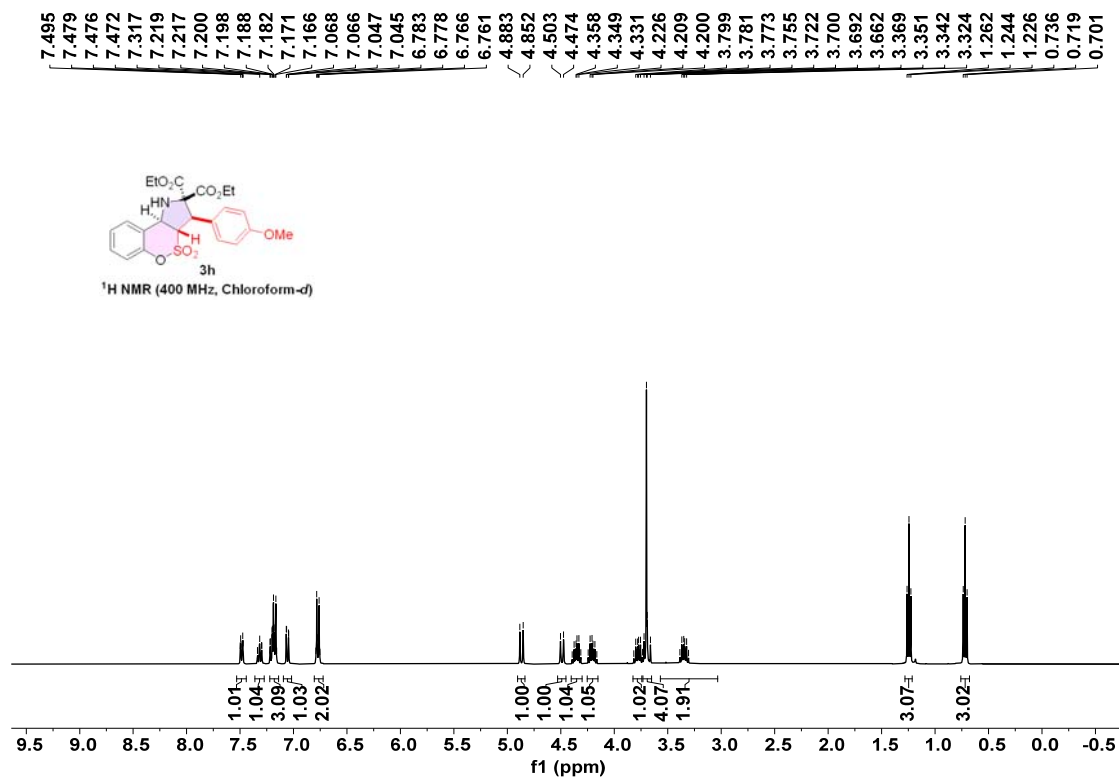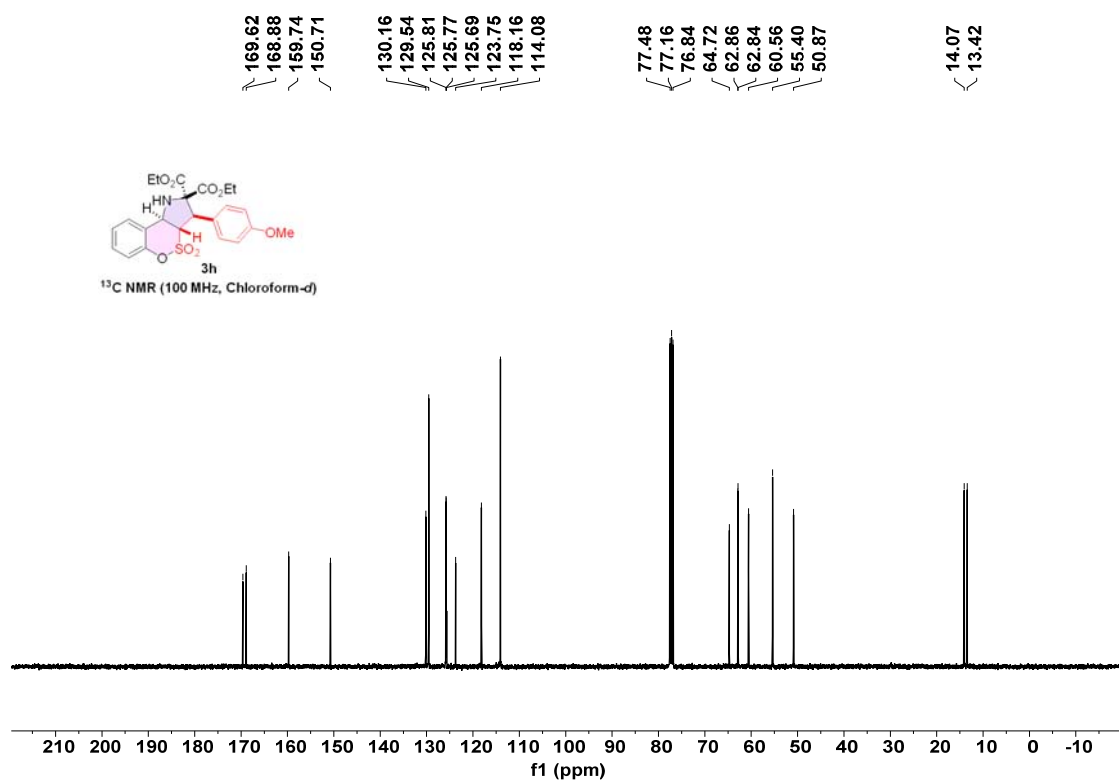

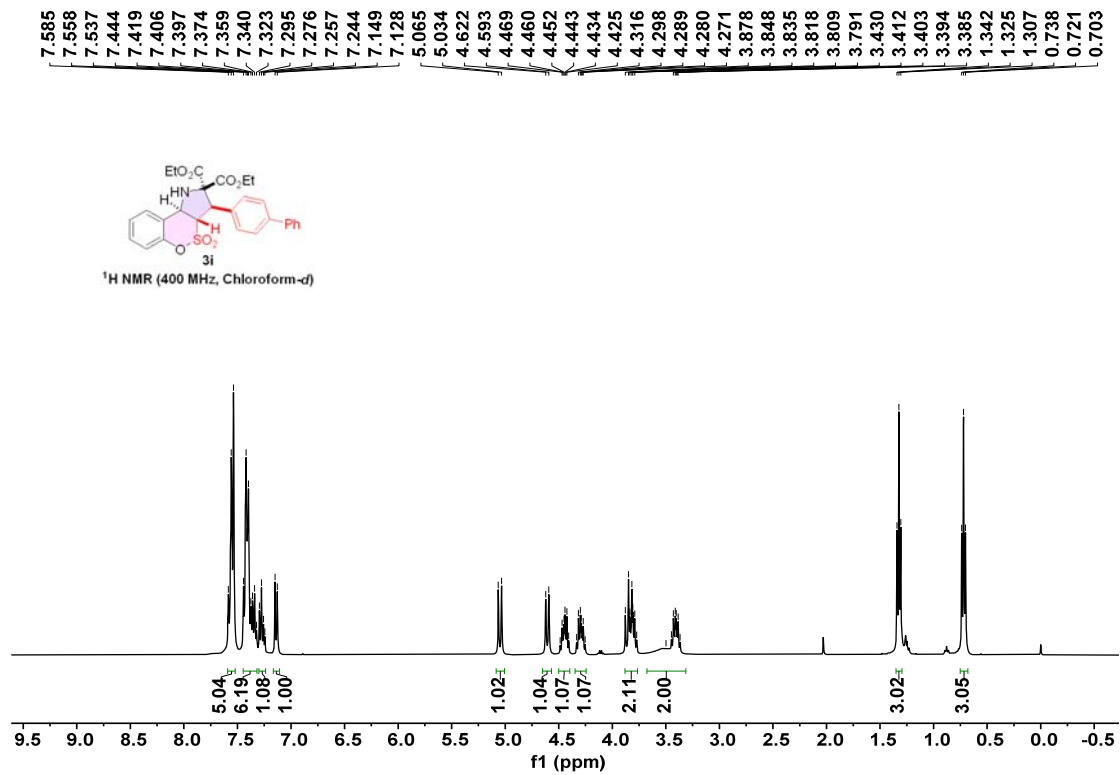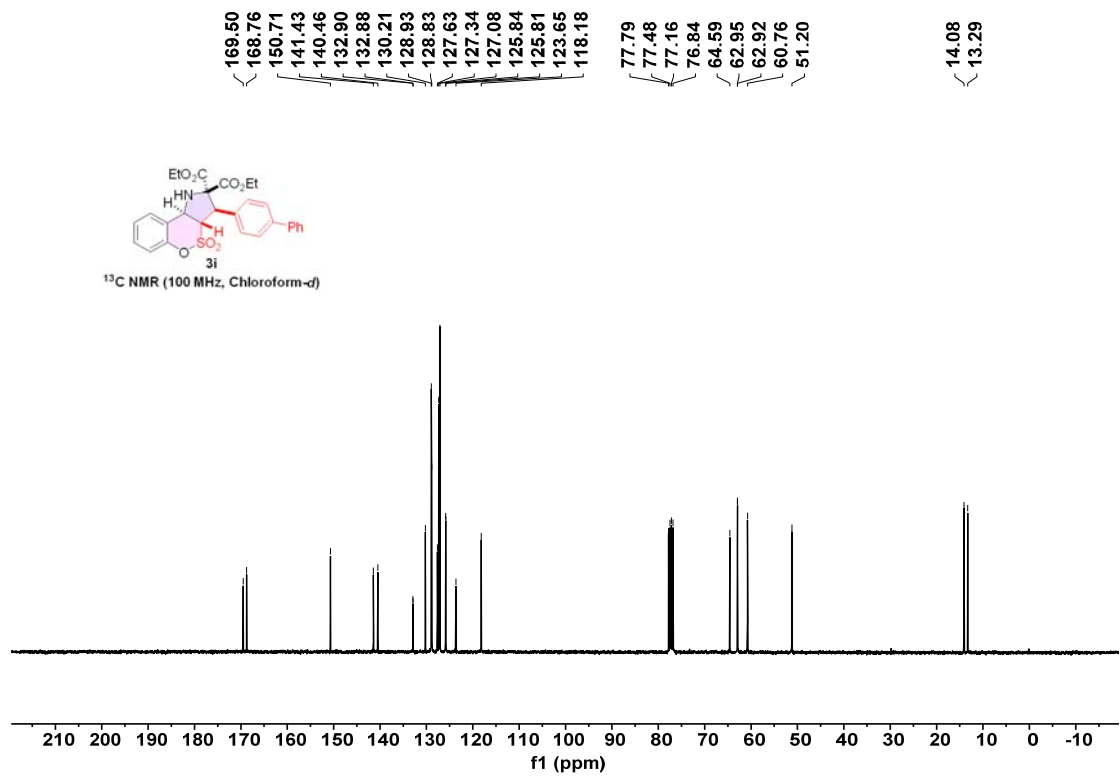

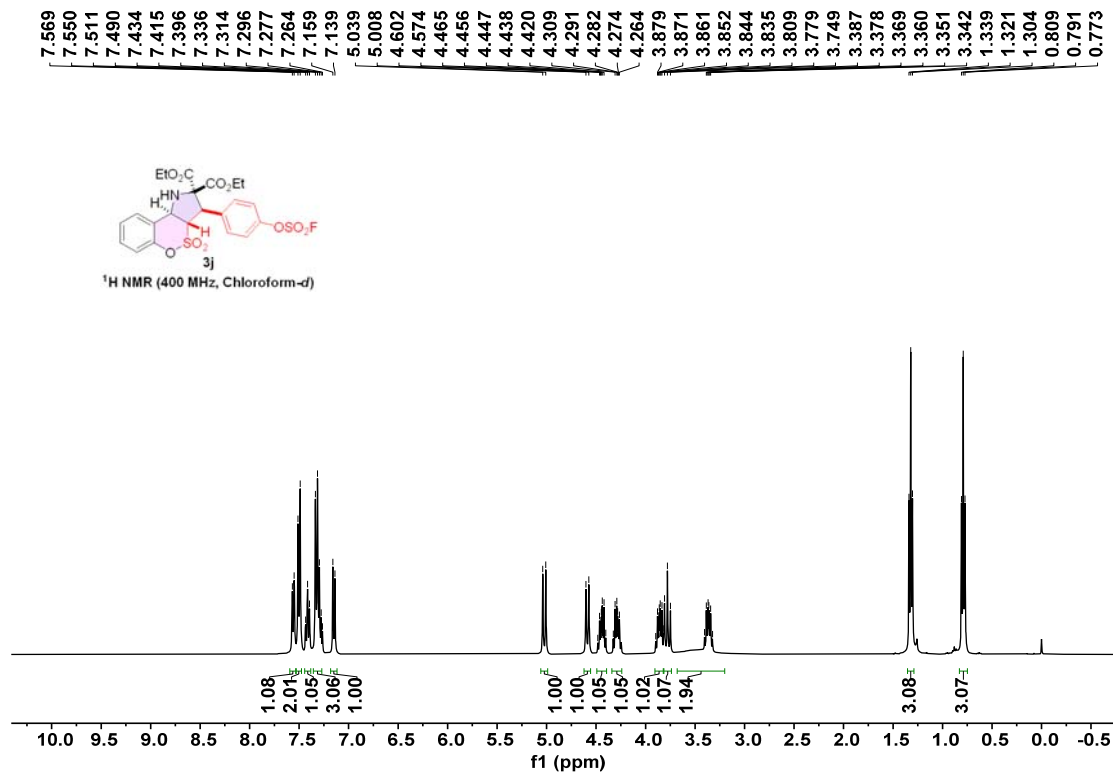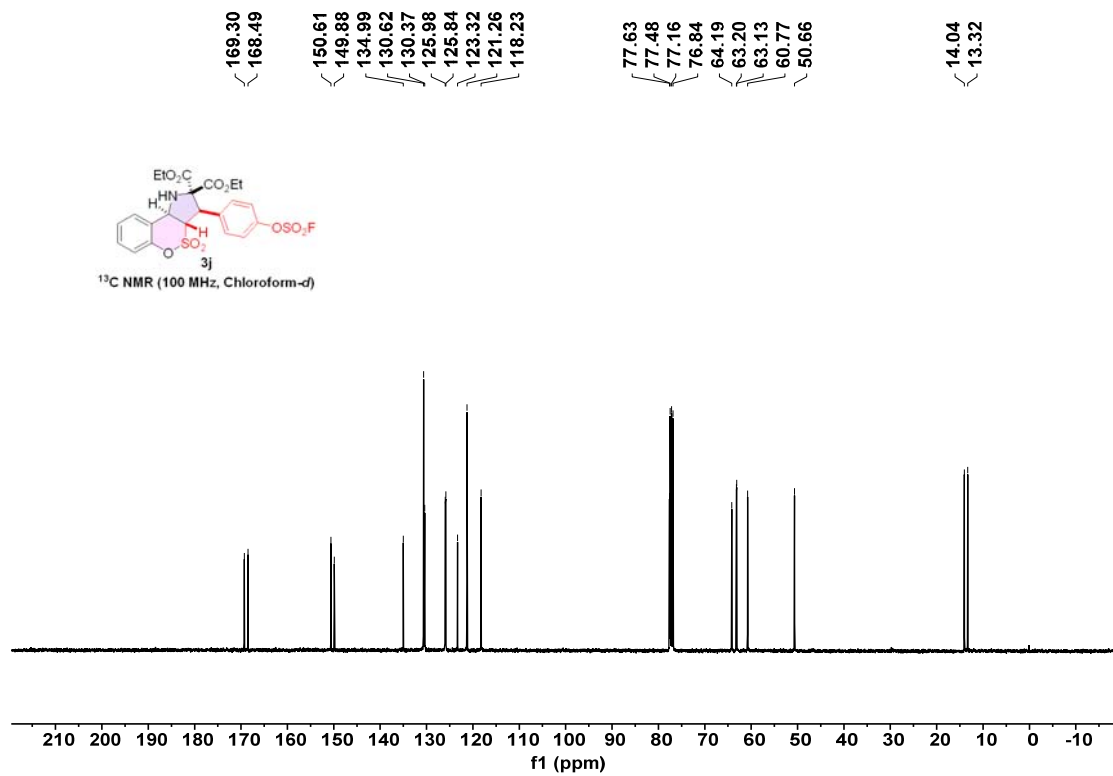

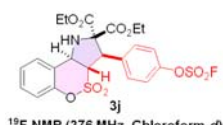

<sup>19</sup>F NMR (376 MHz, Chloroform-d)

-43.250

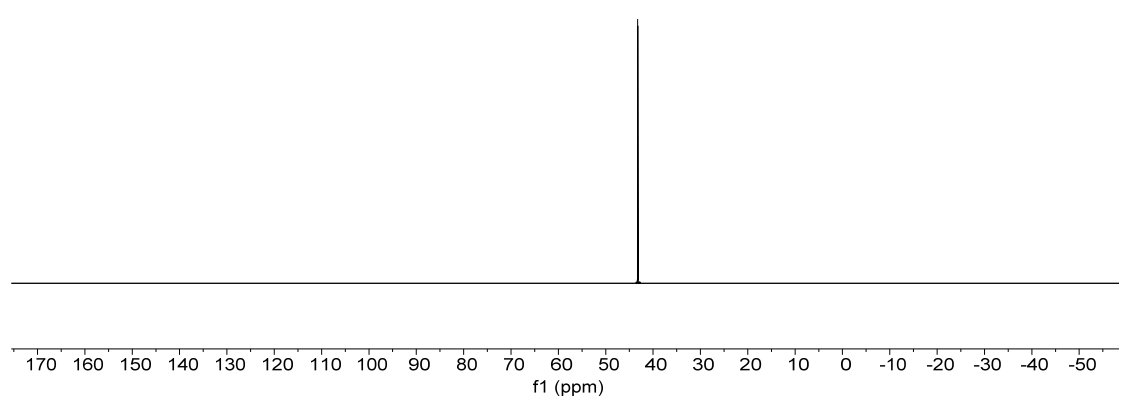

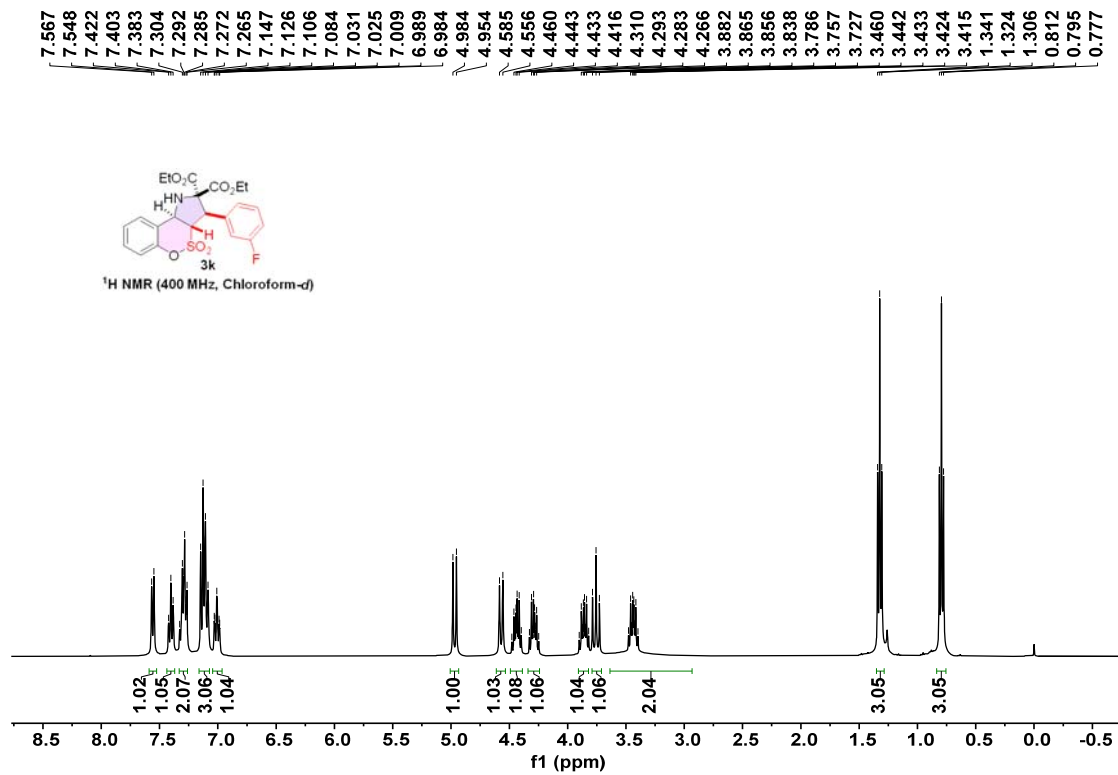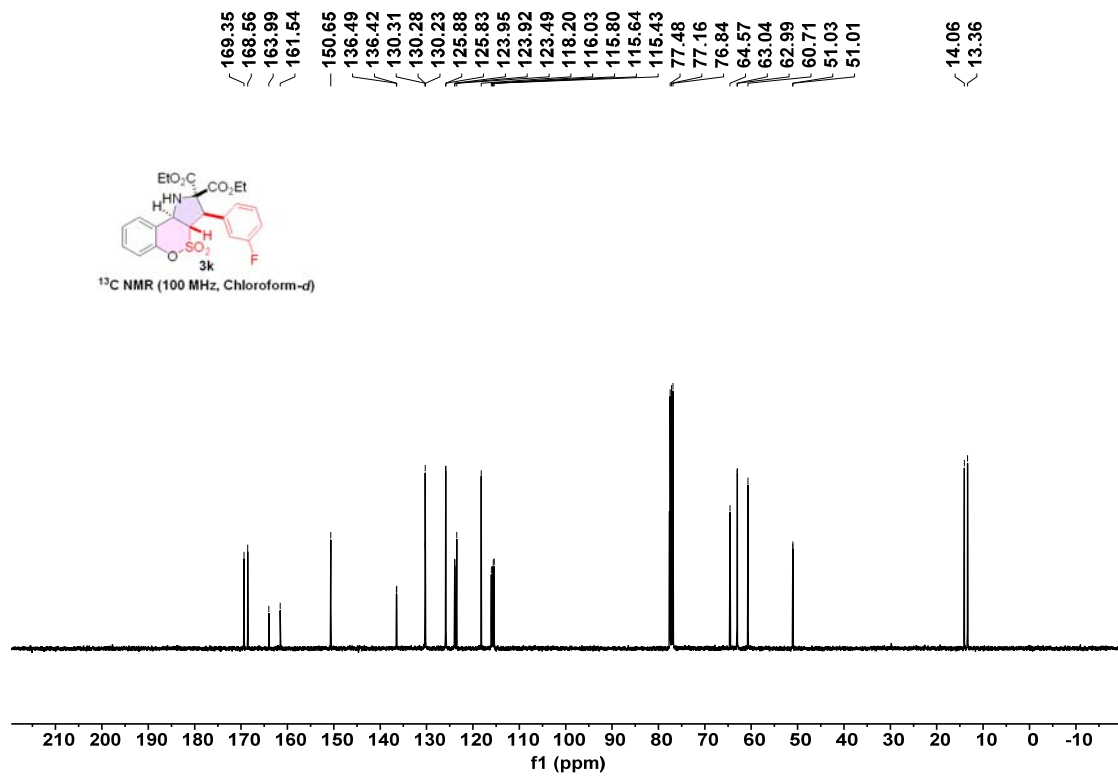

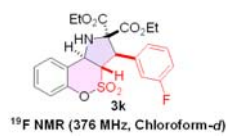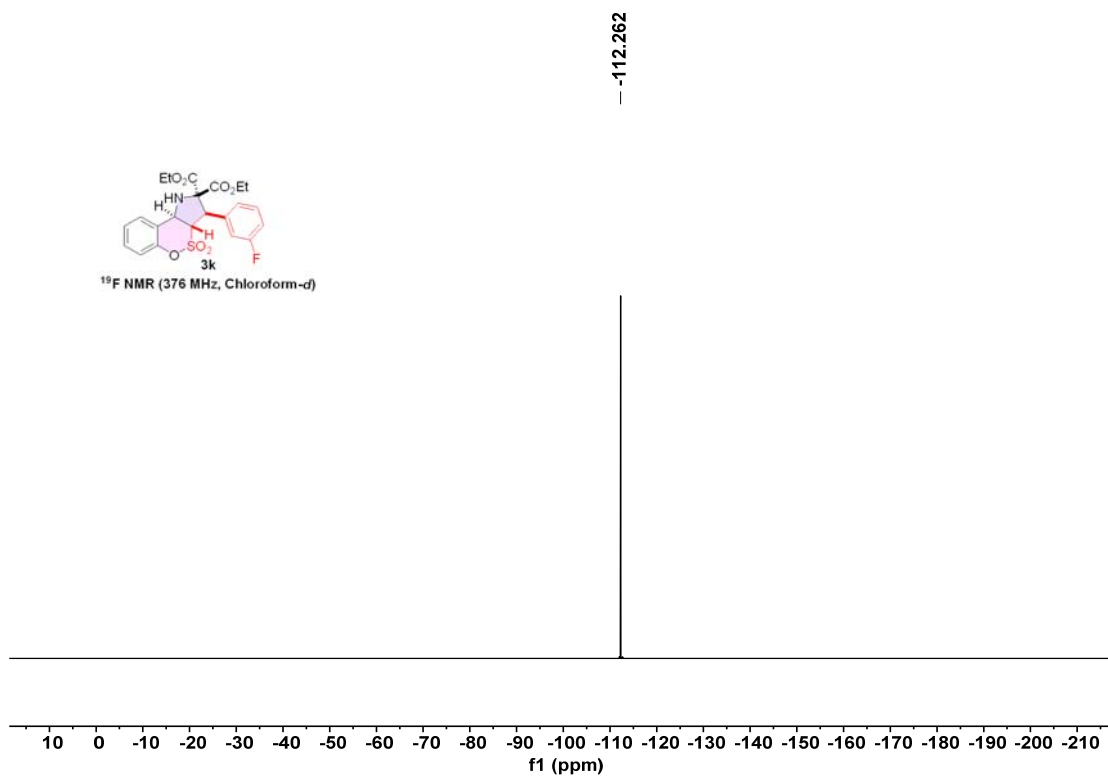



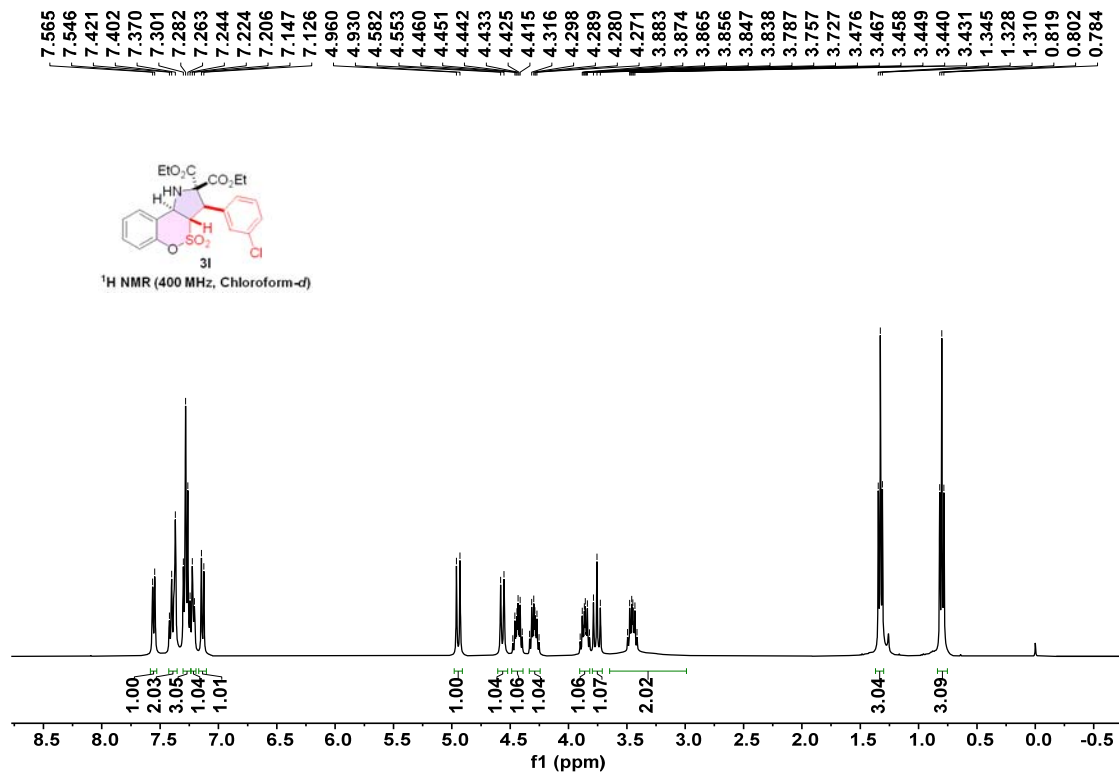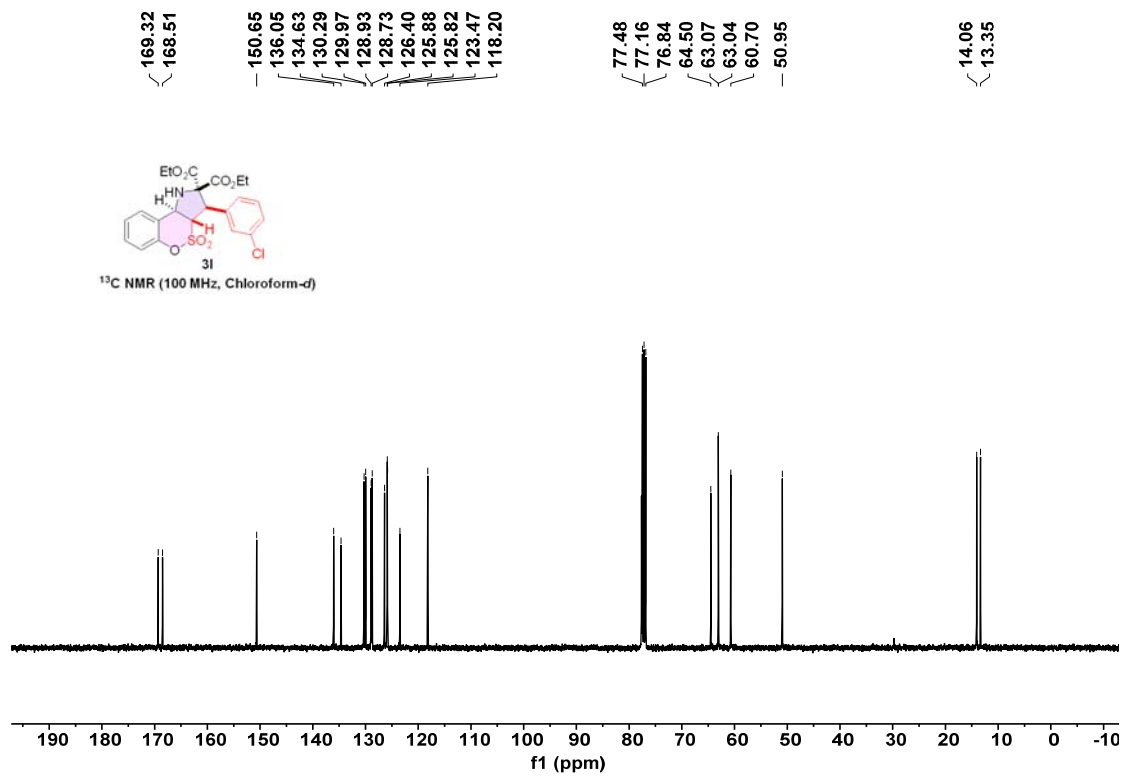

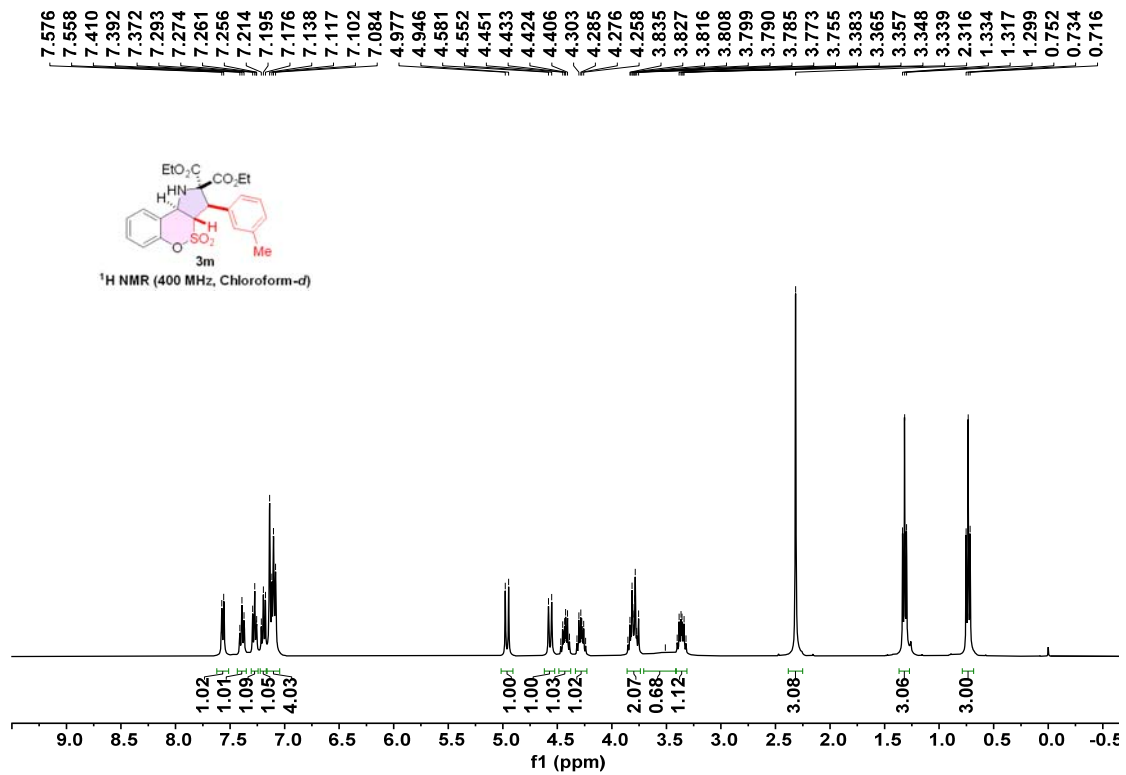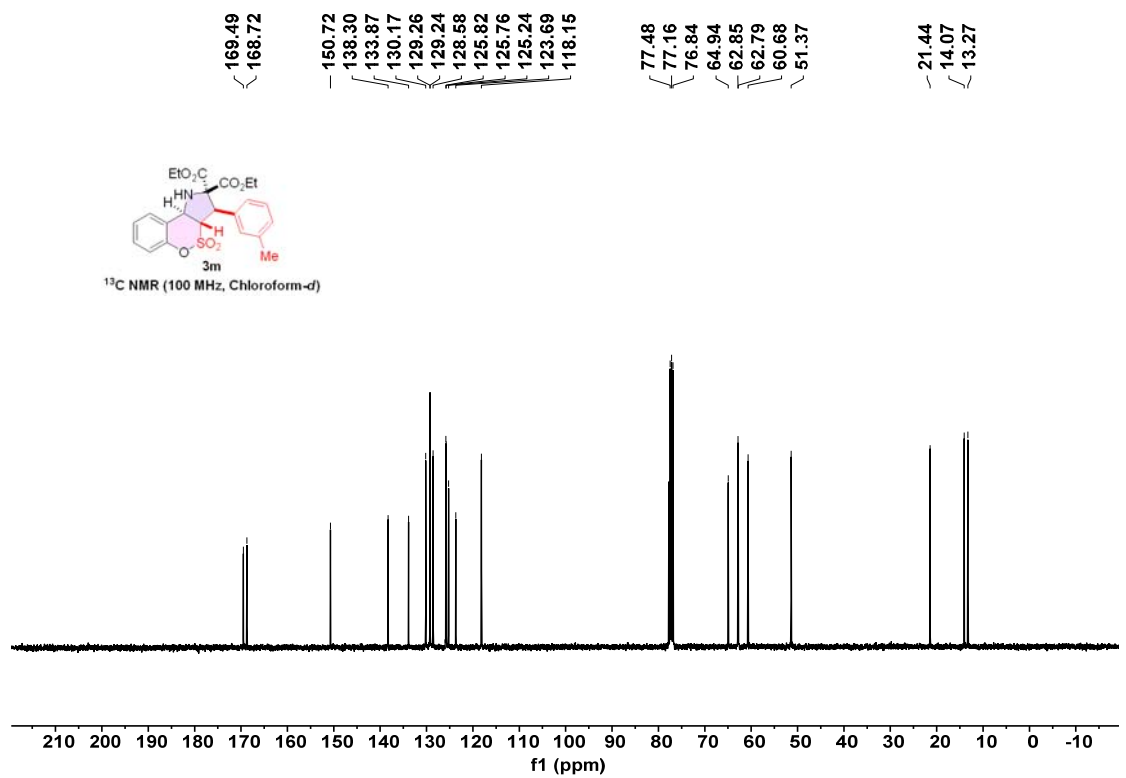

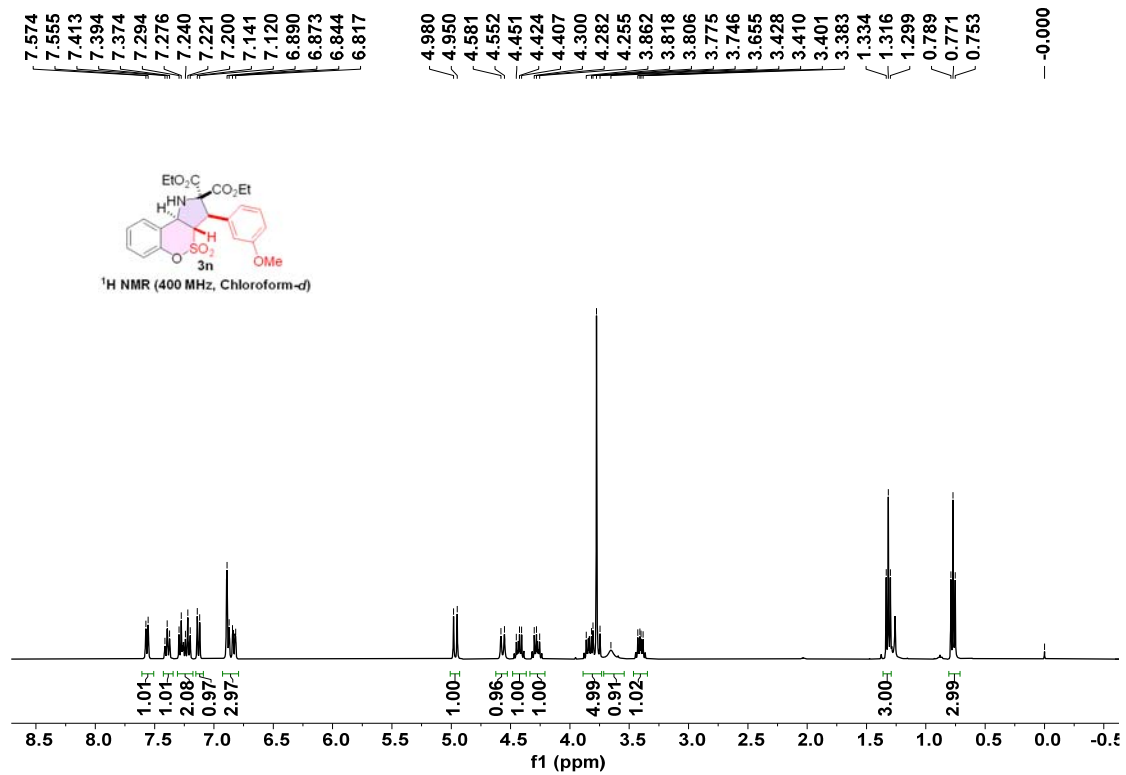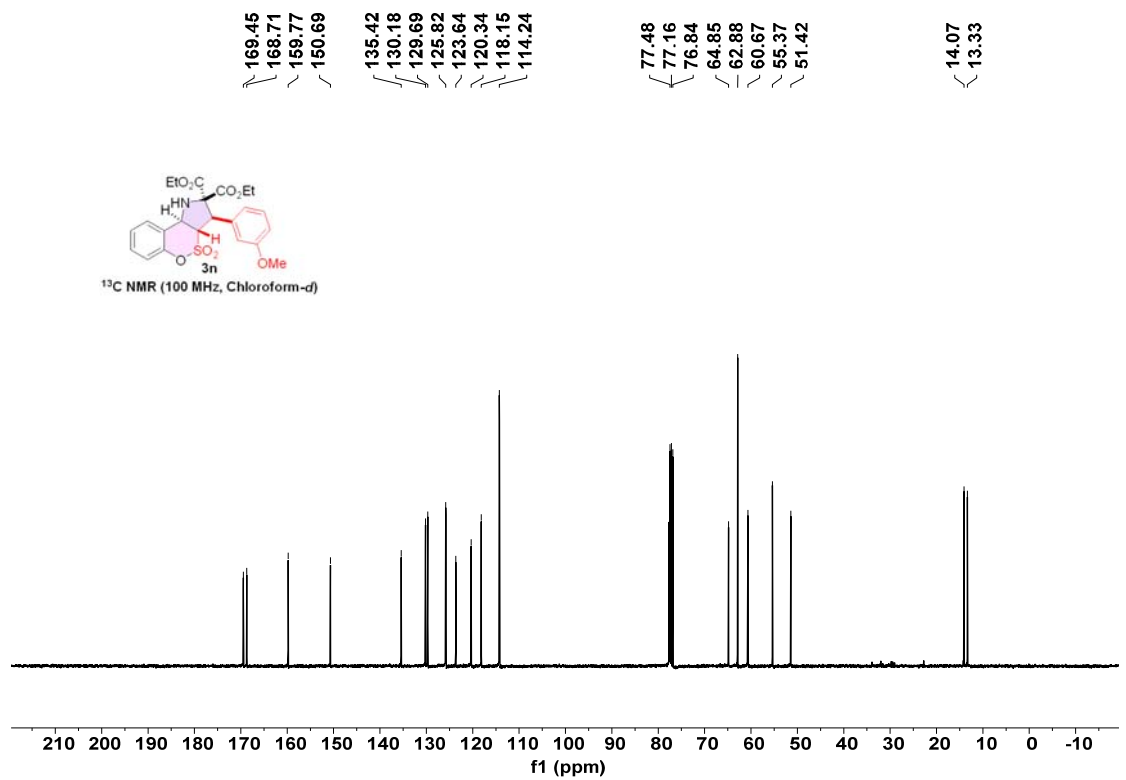

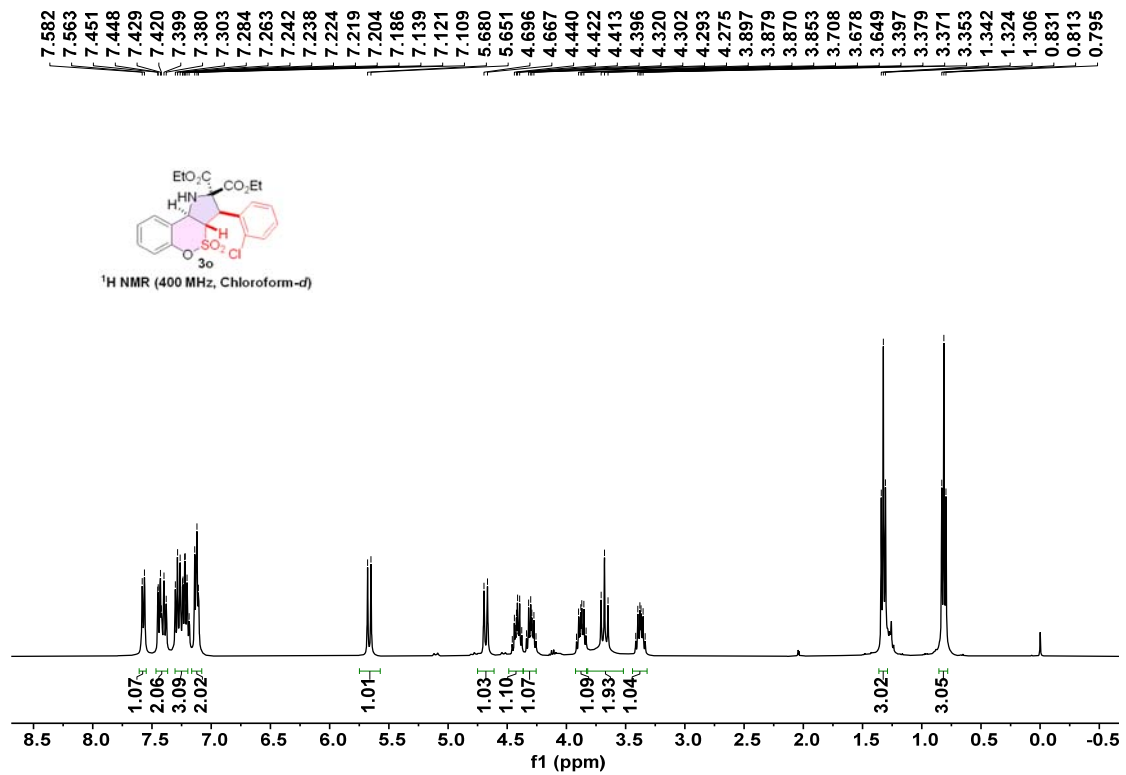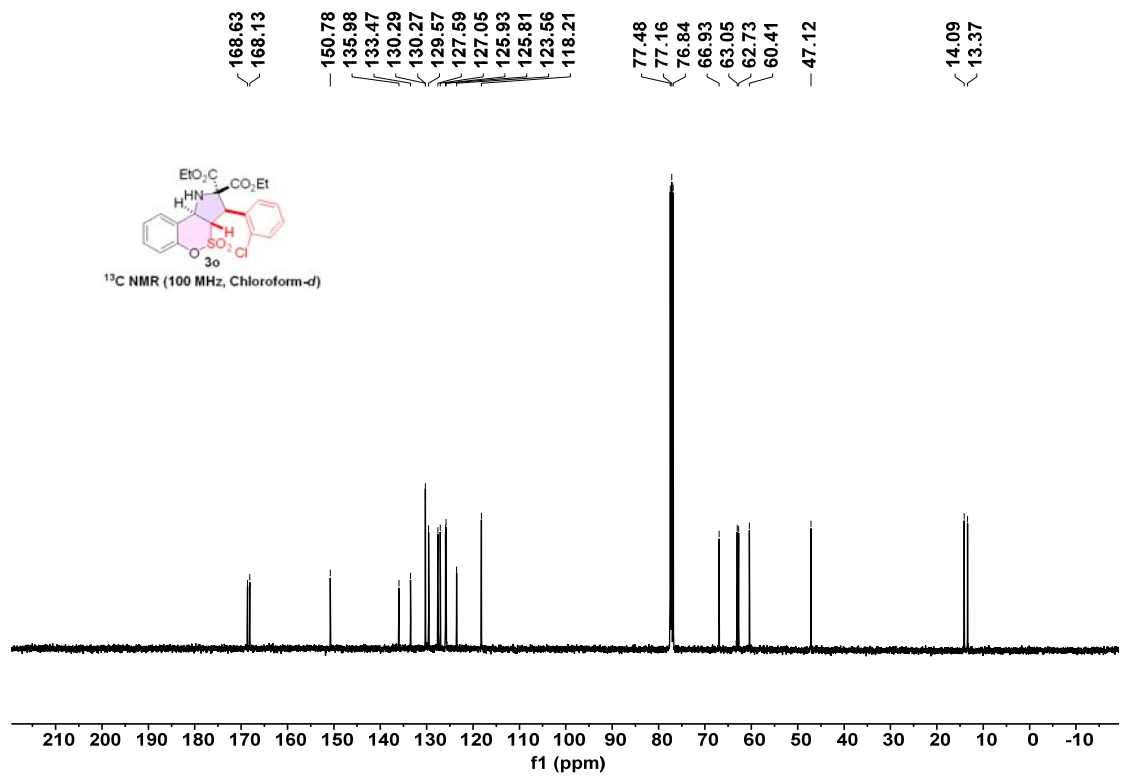

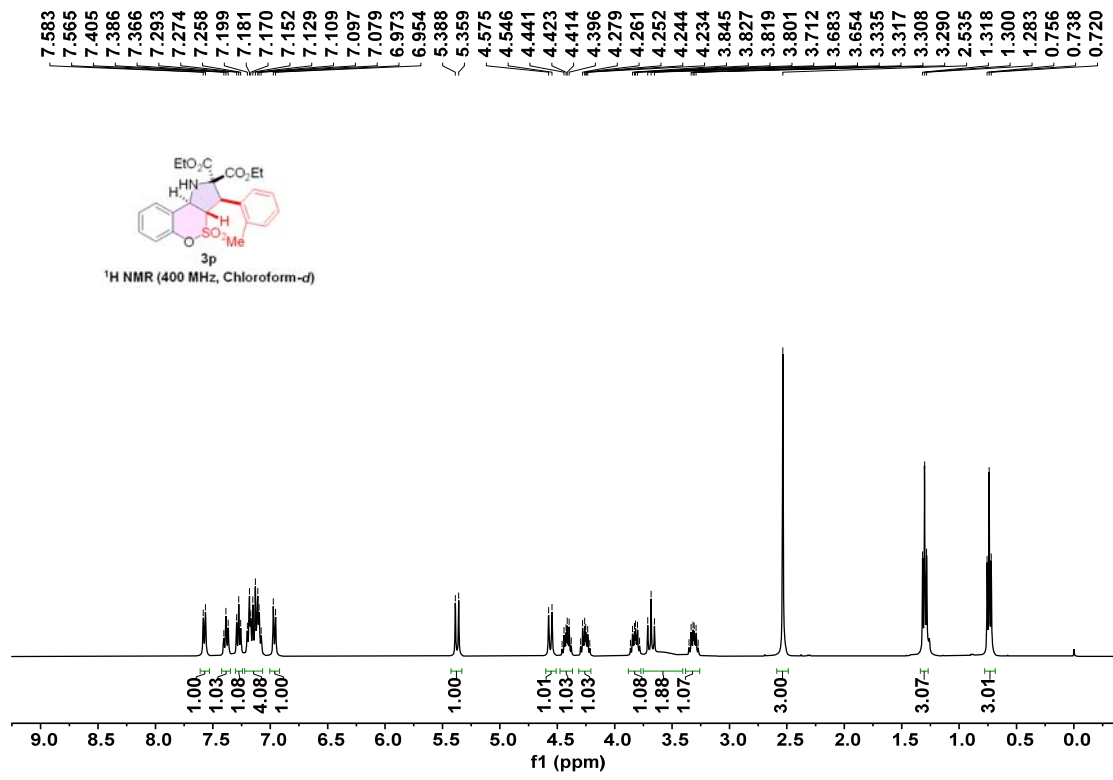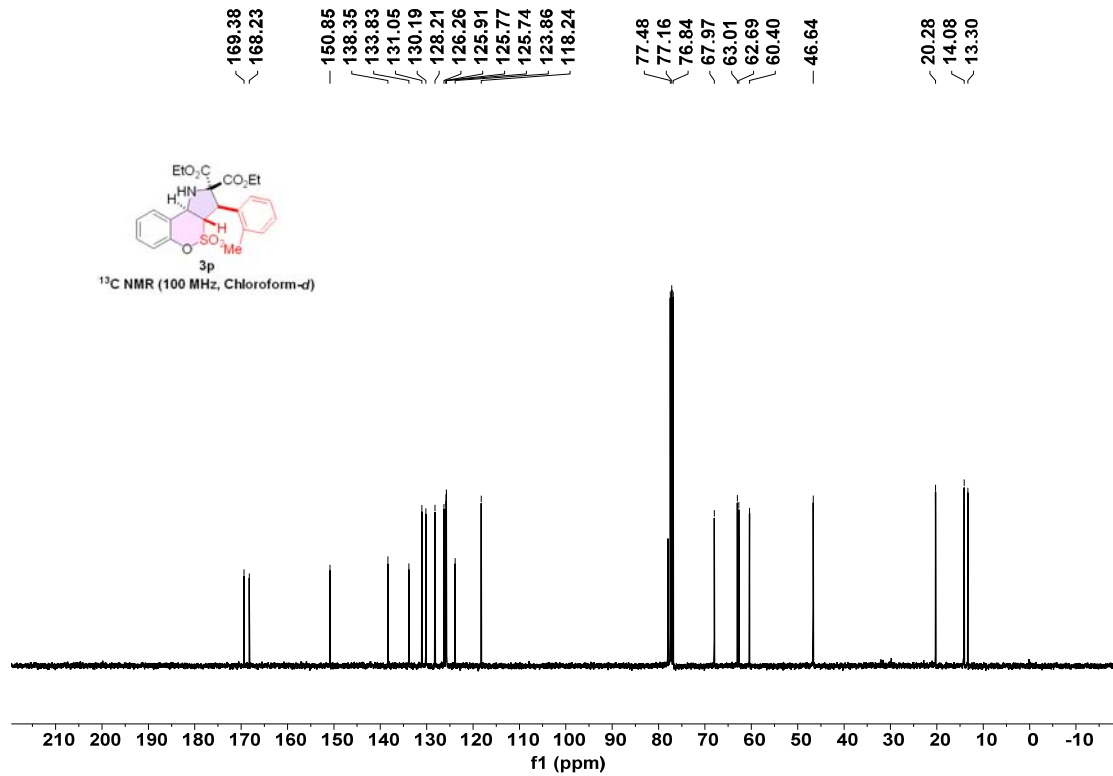

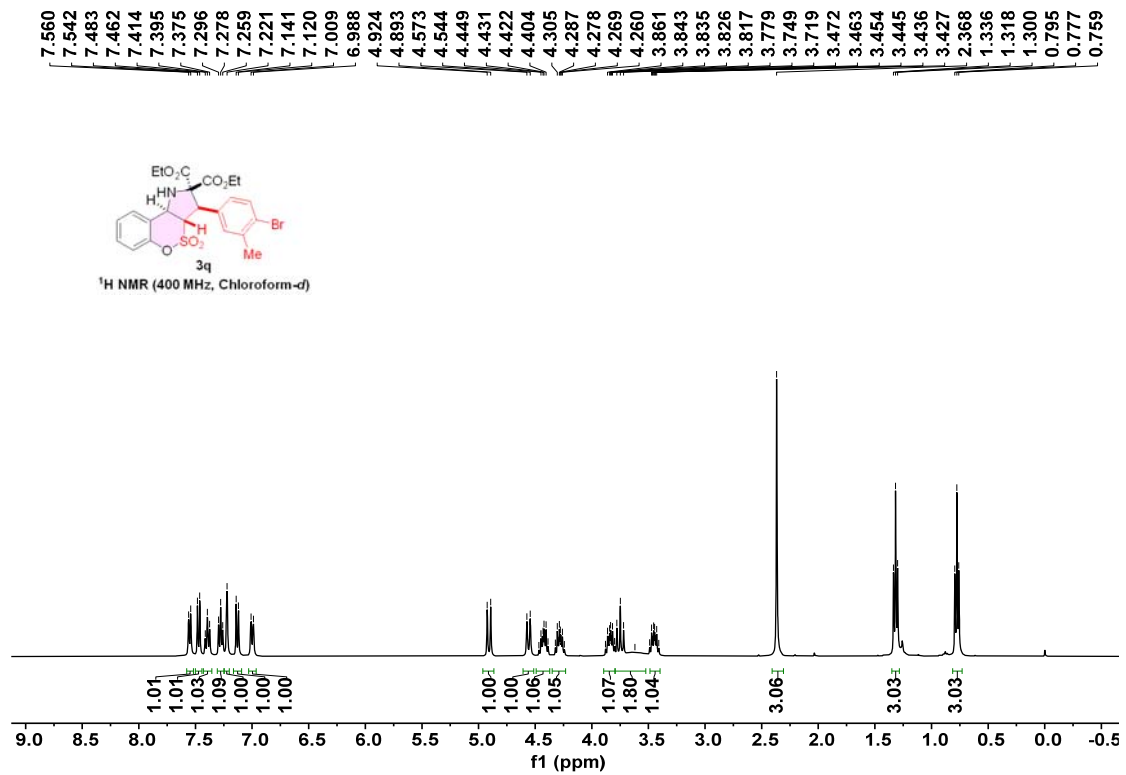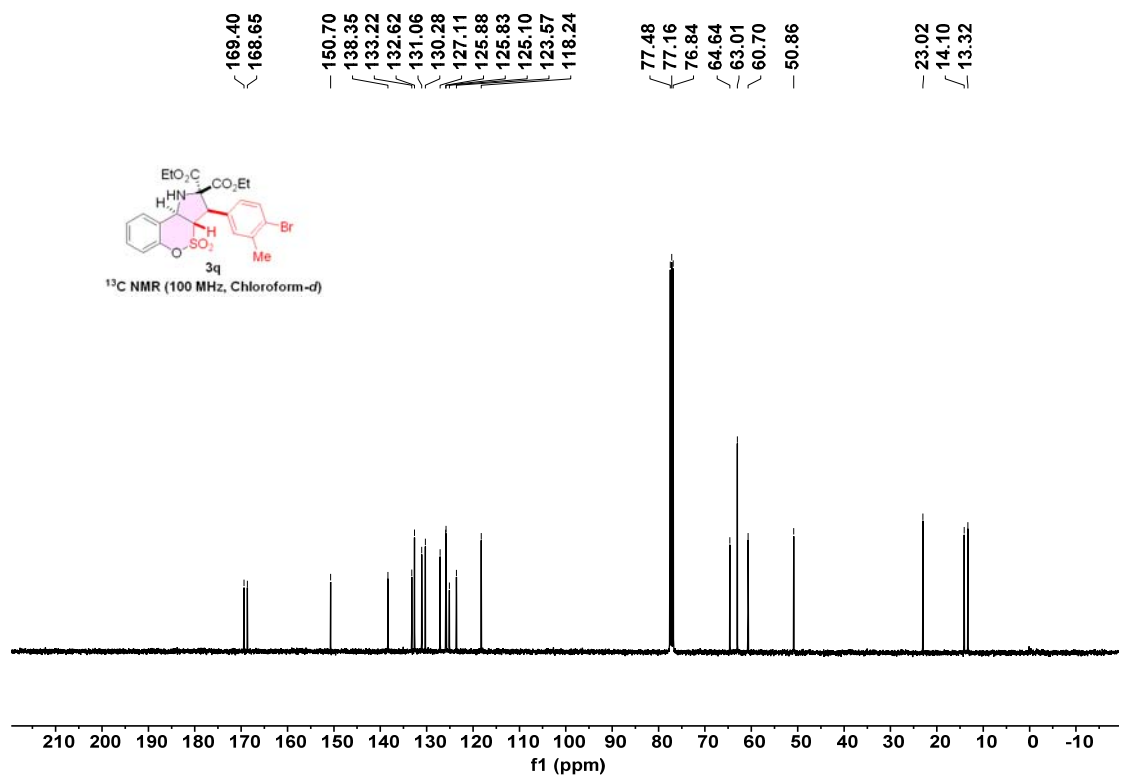

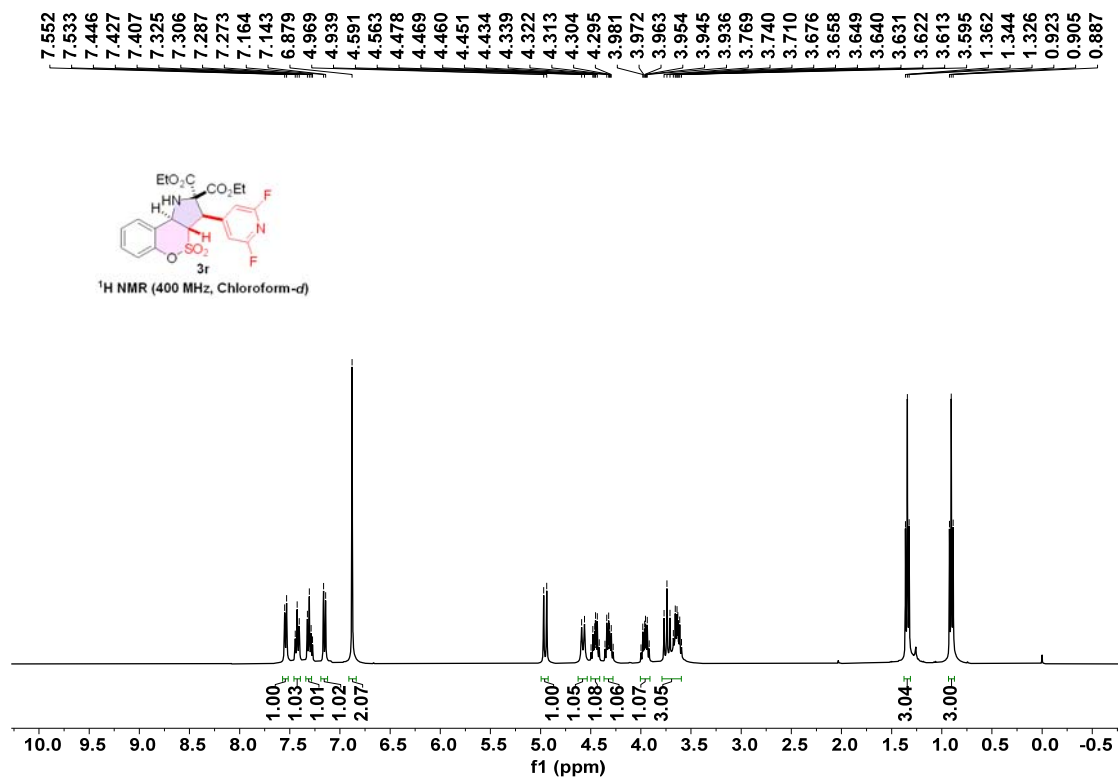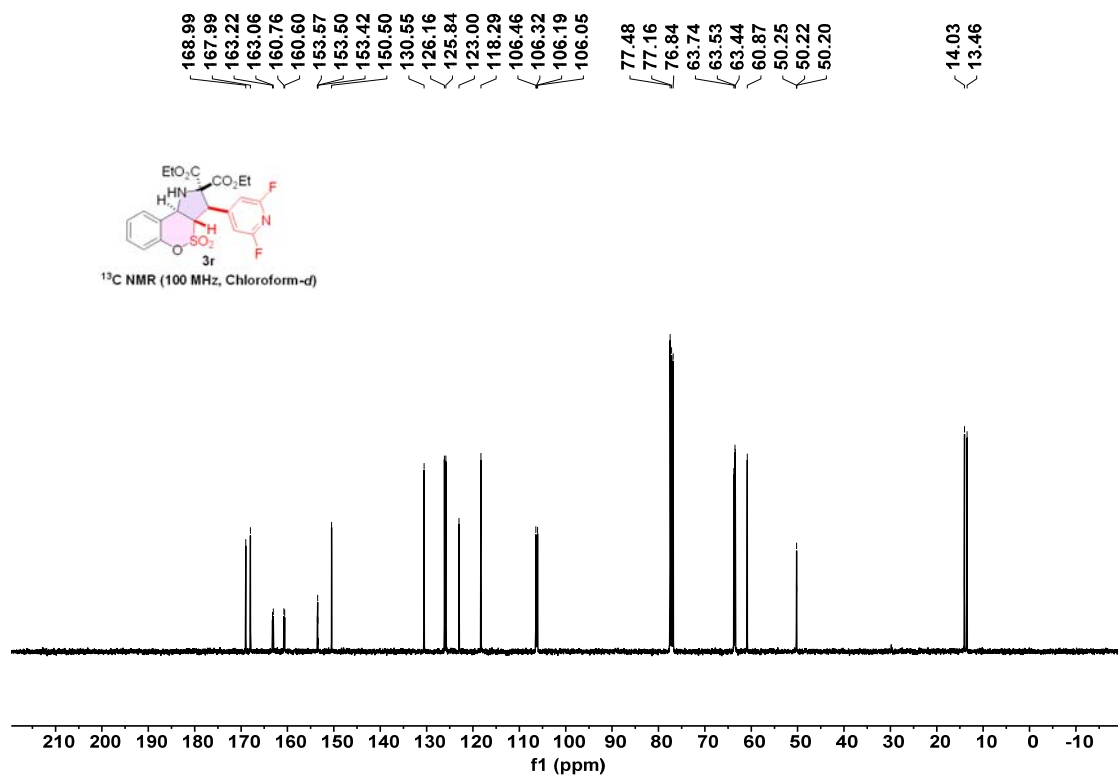

-67.054

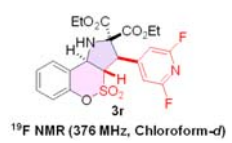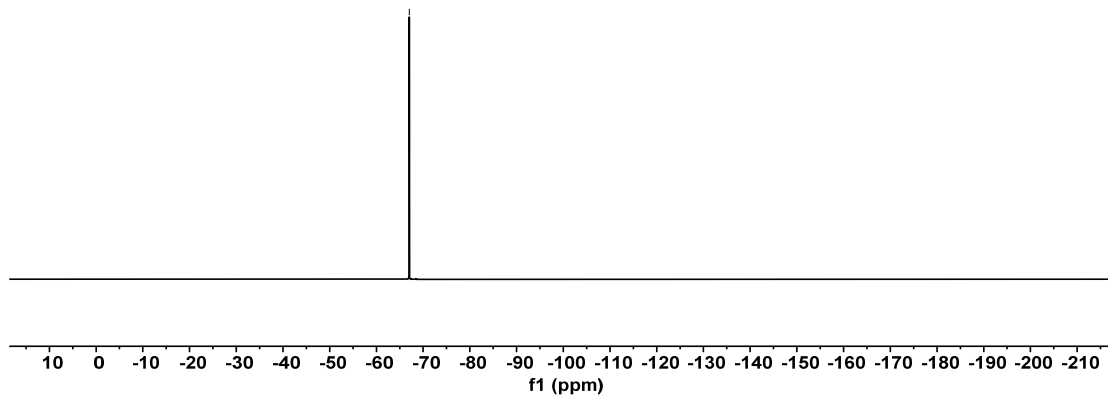



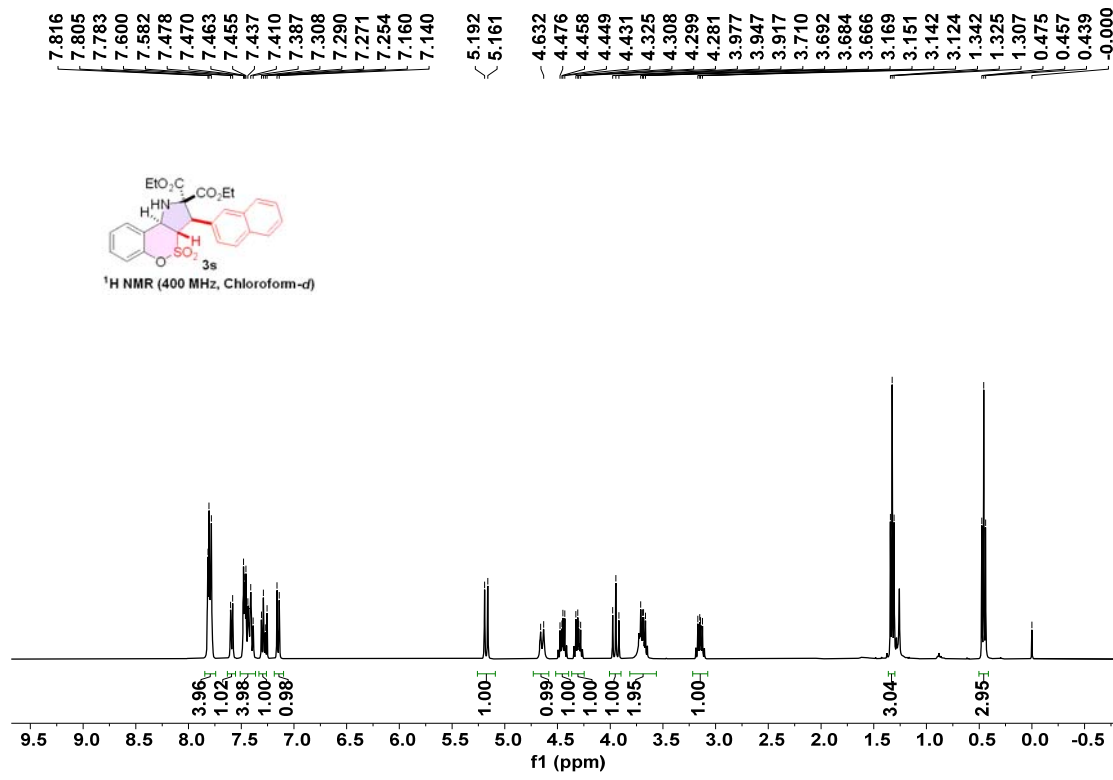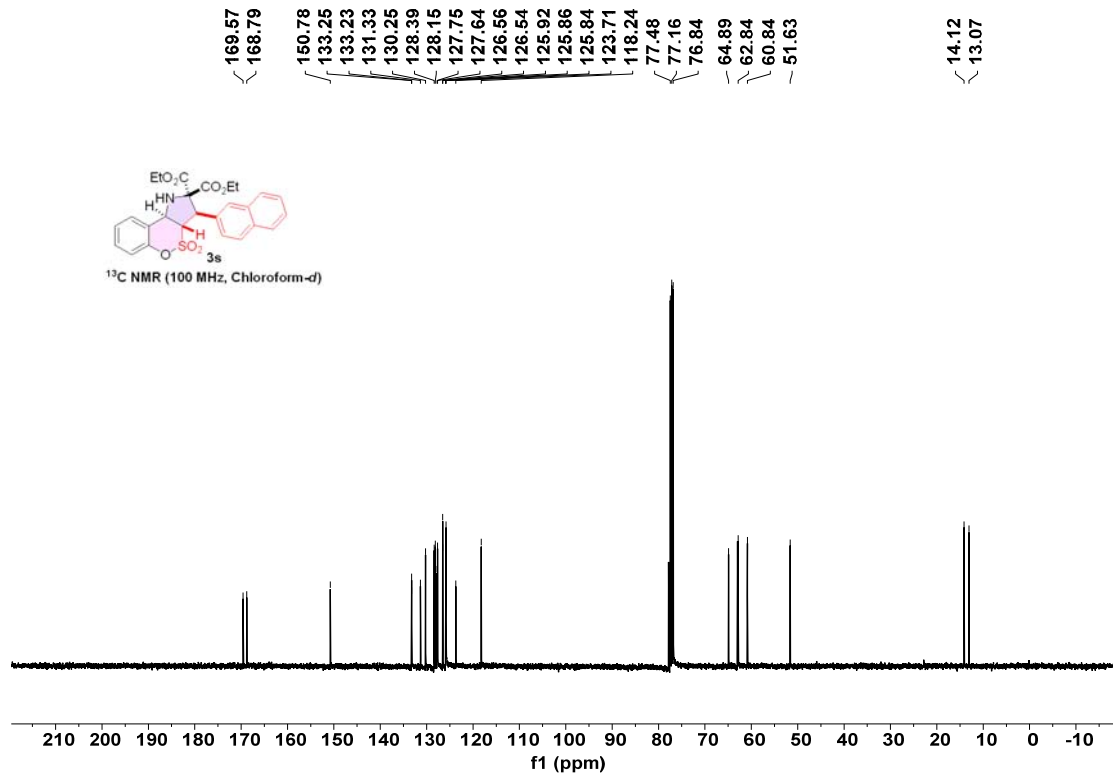

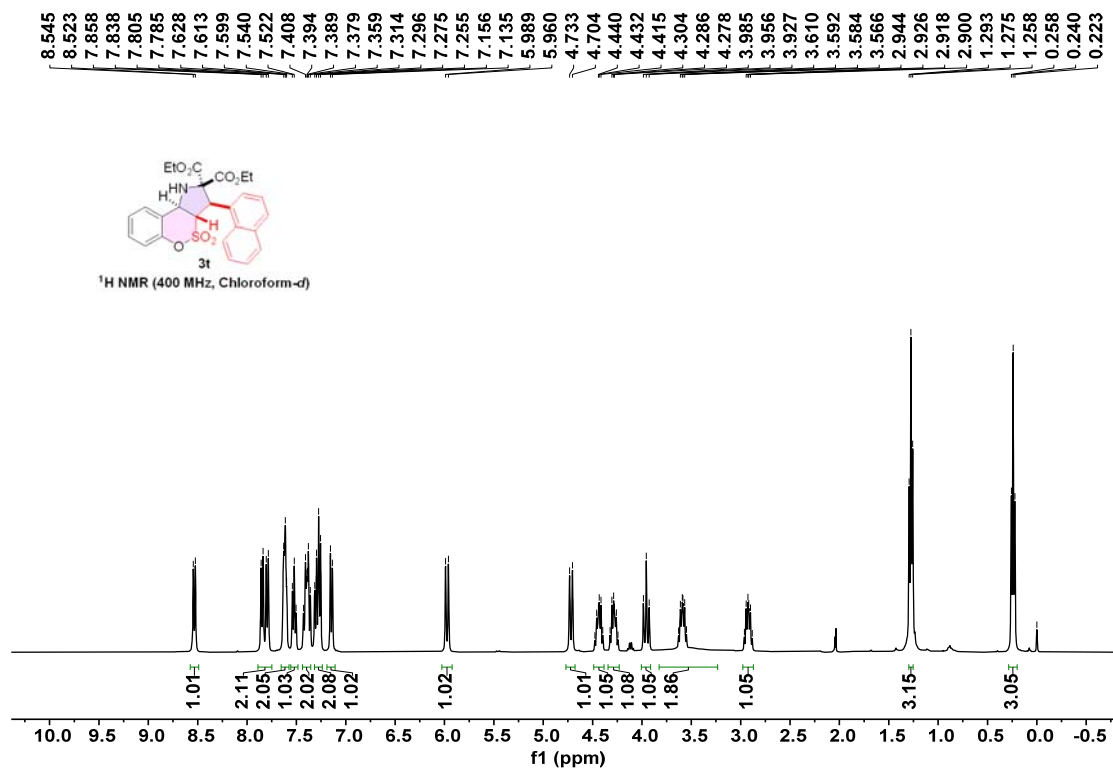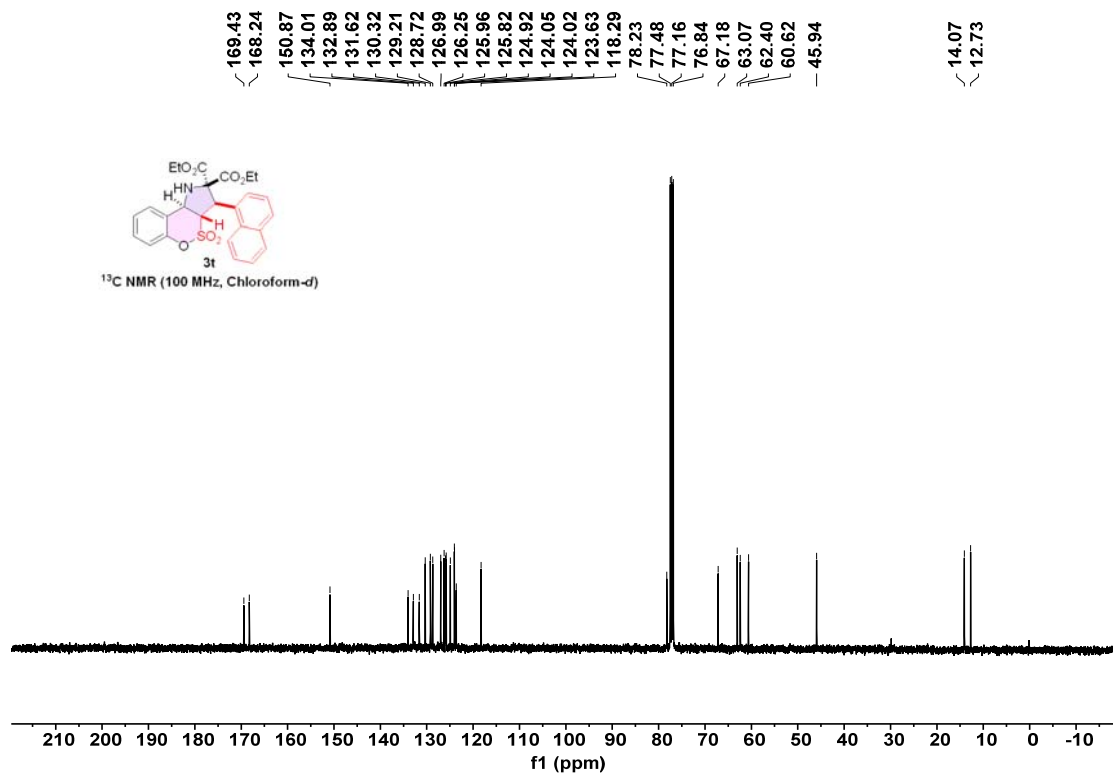

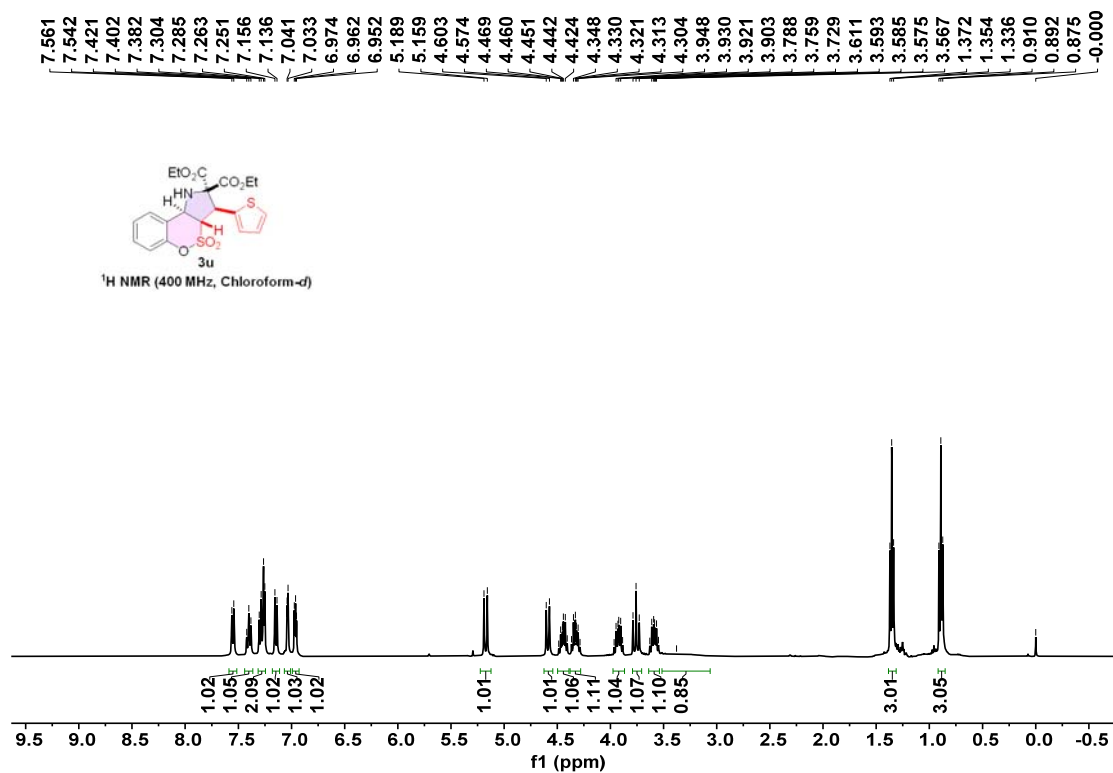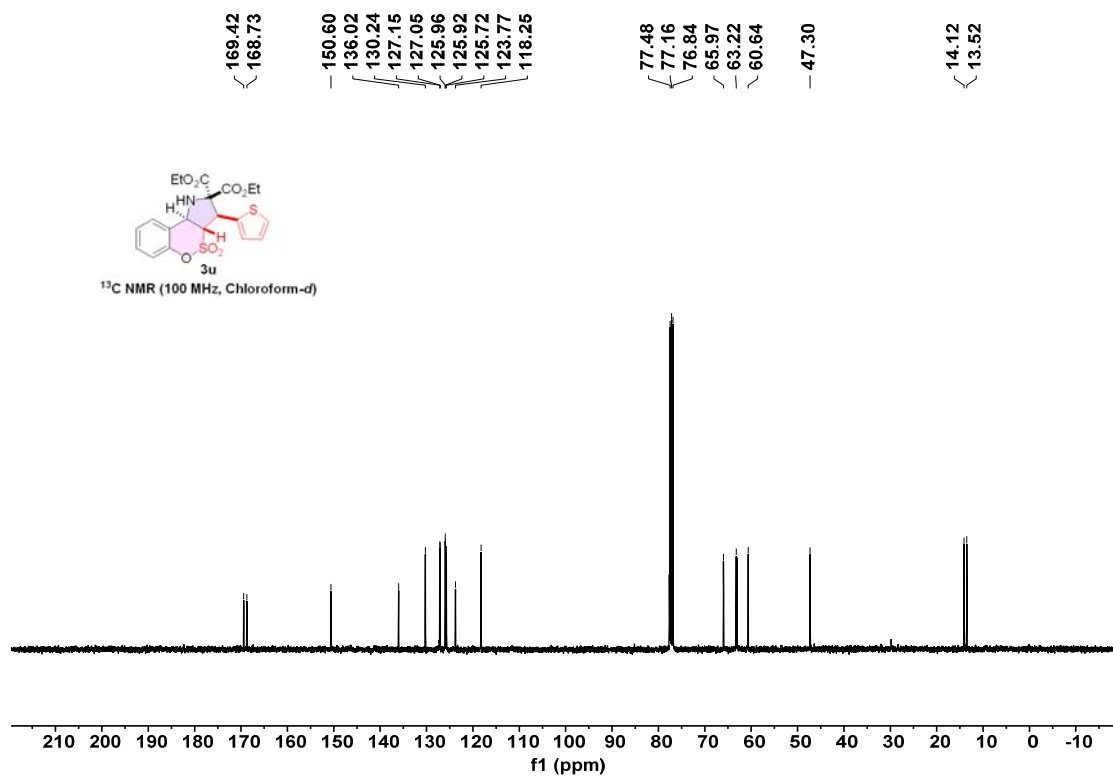

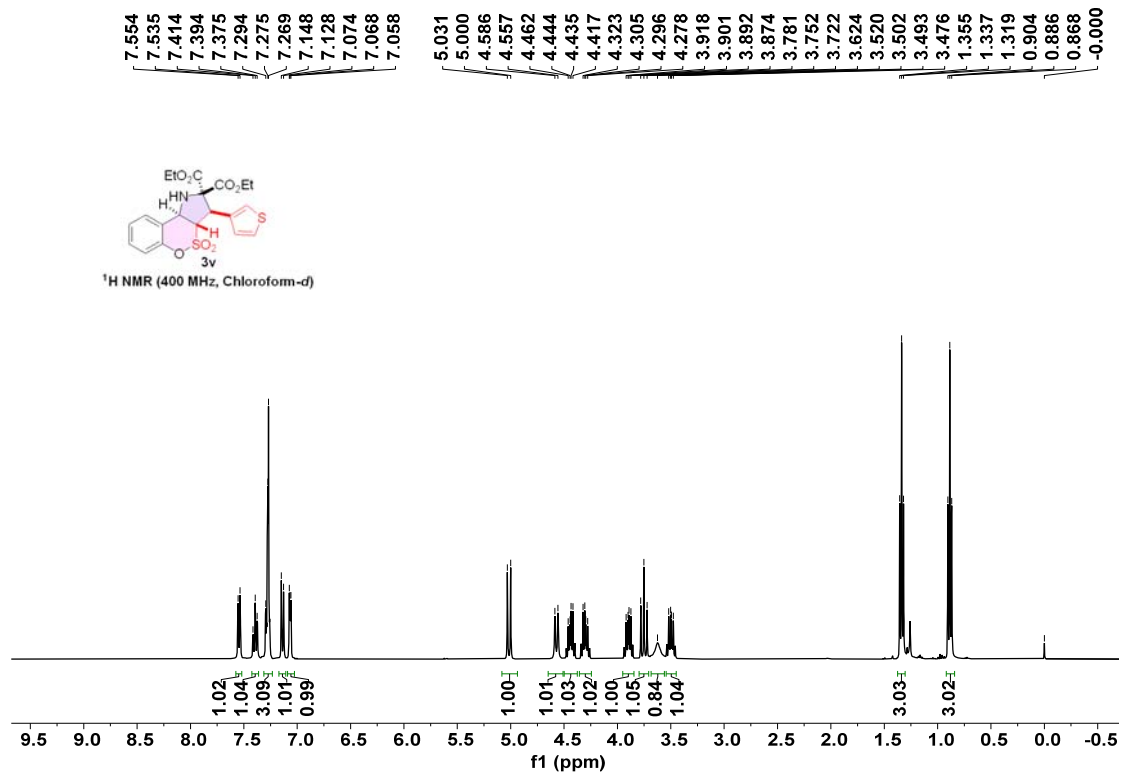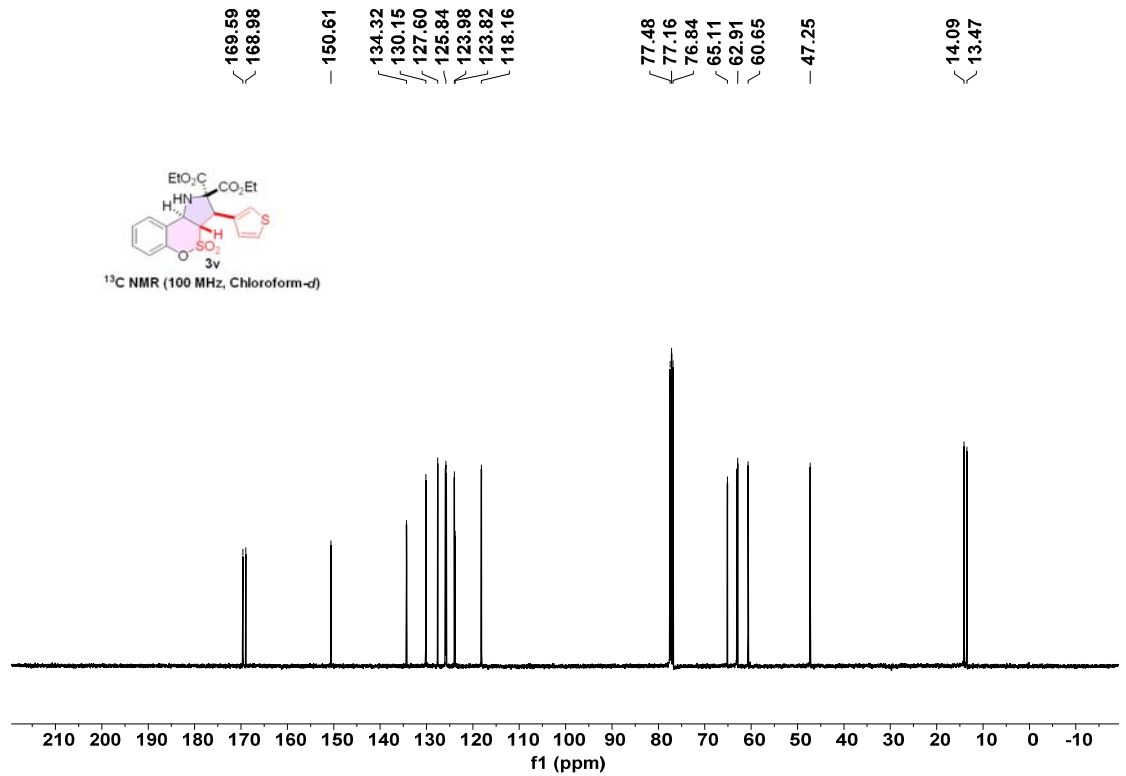

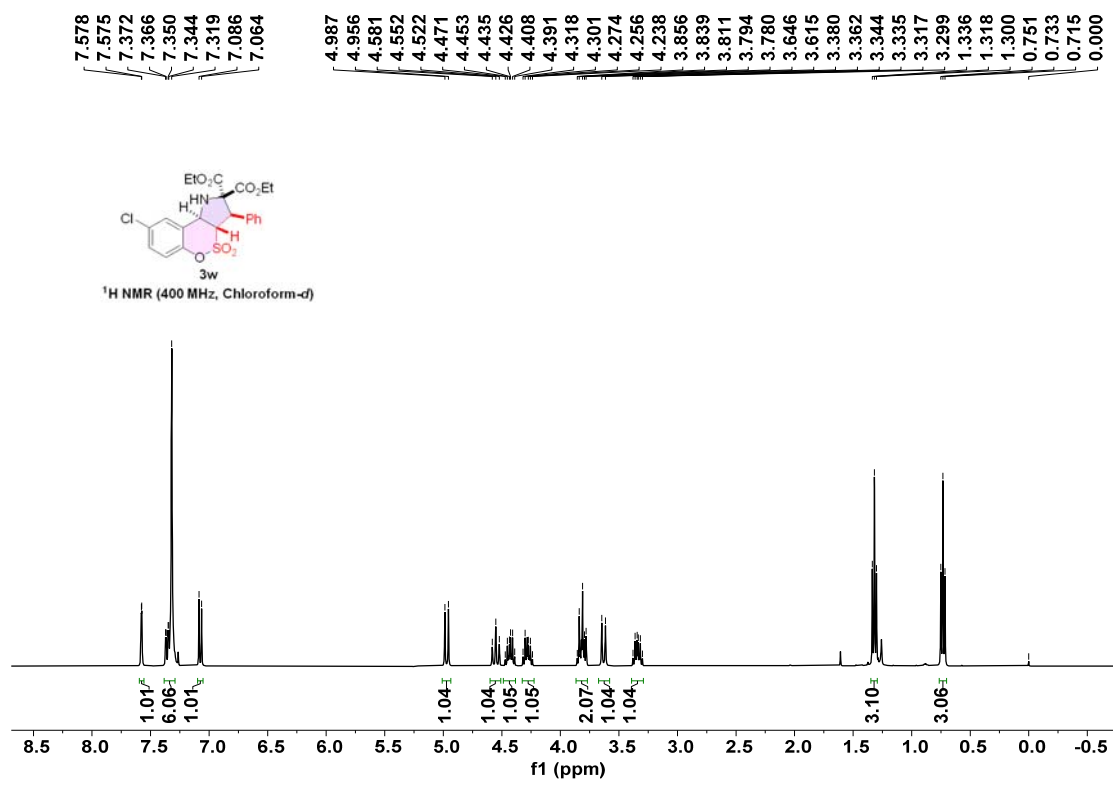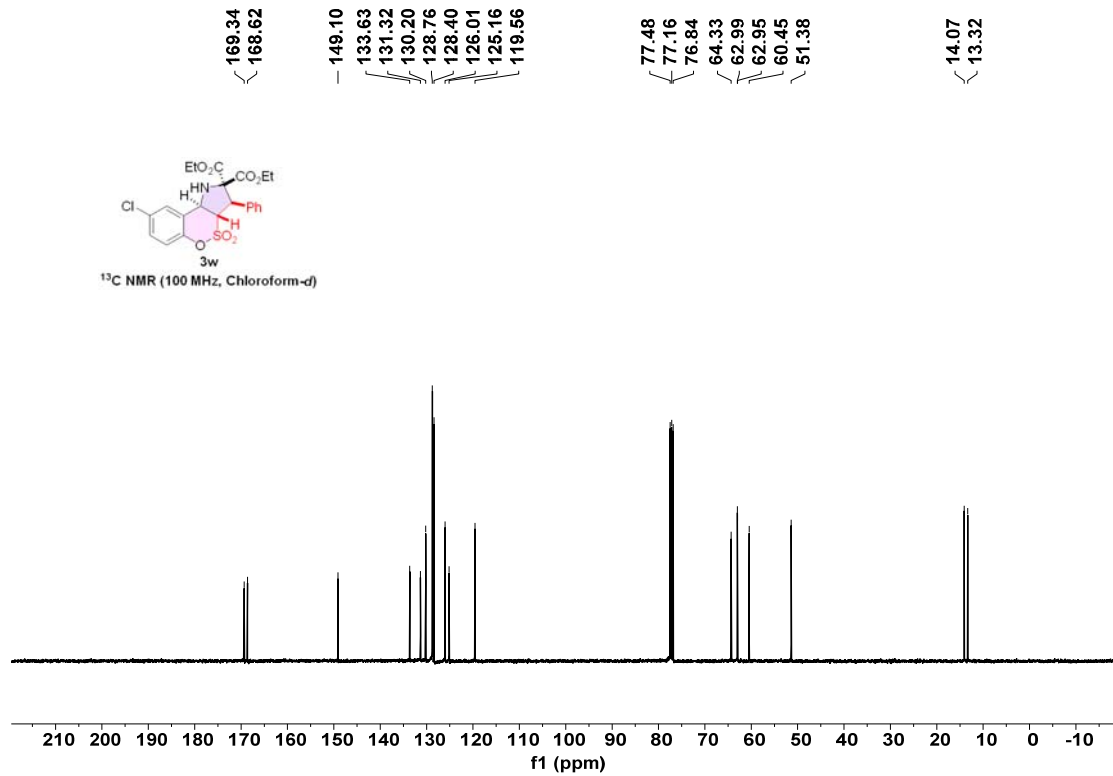

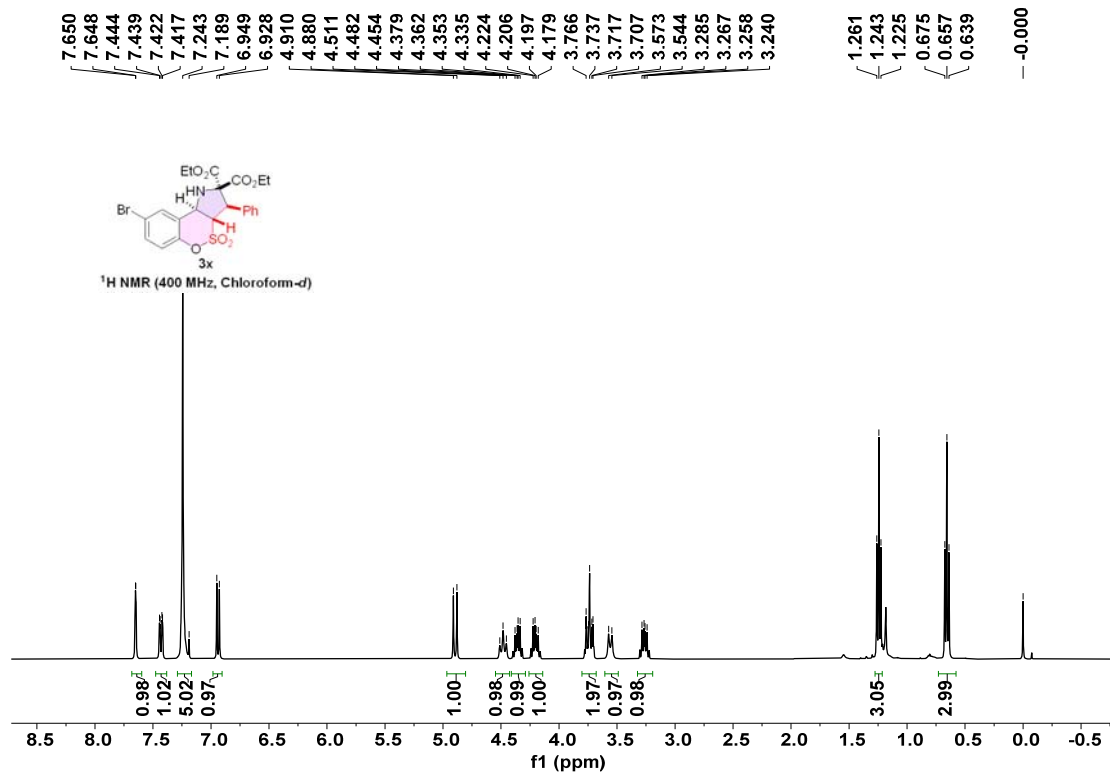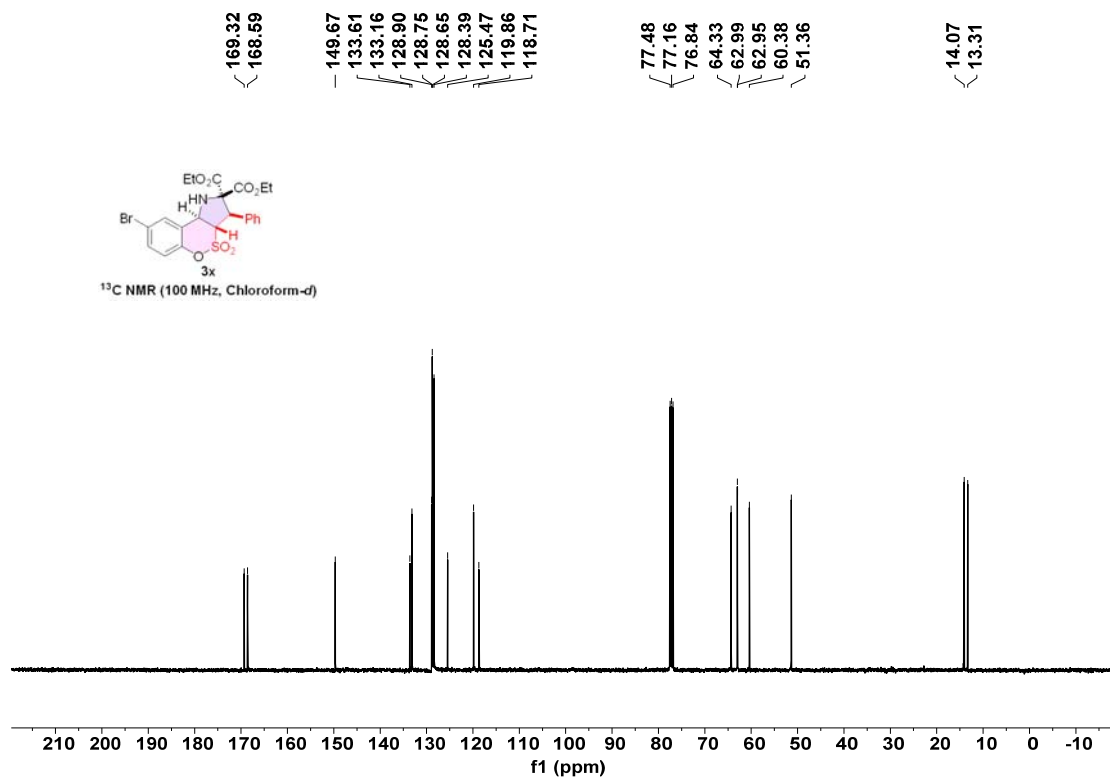

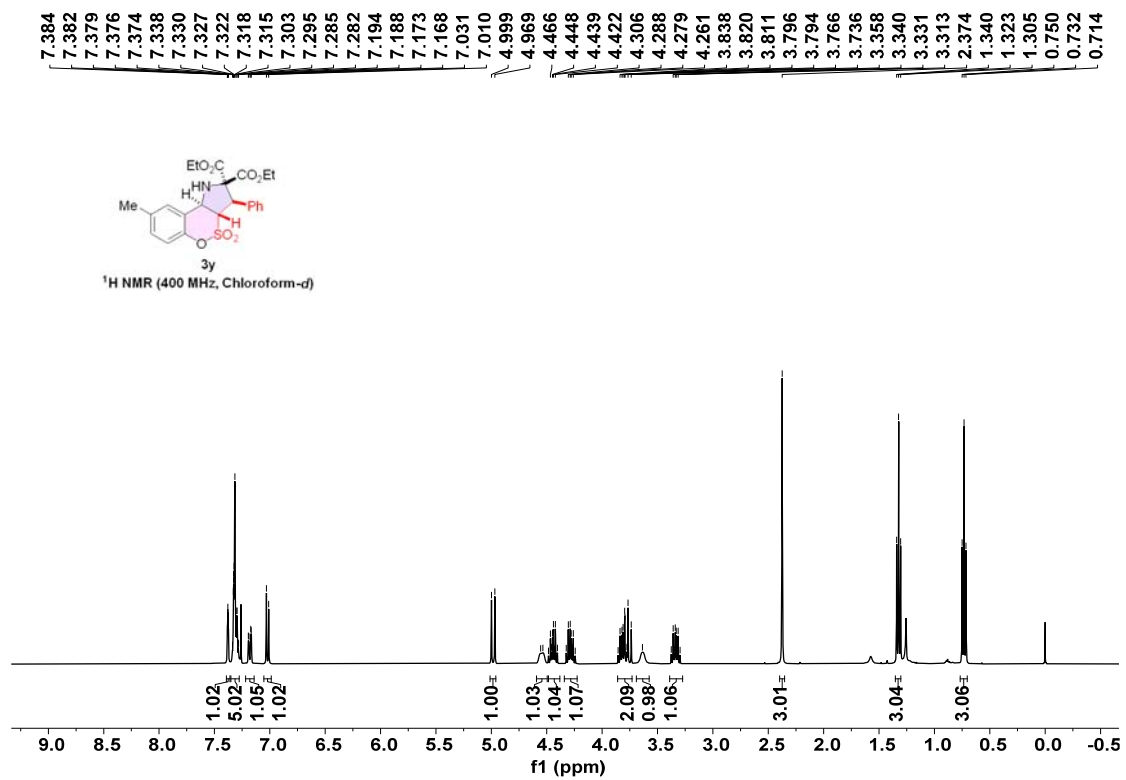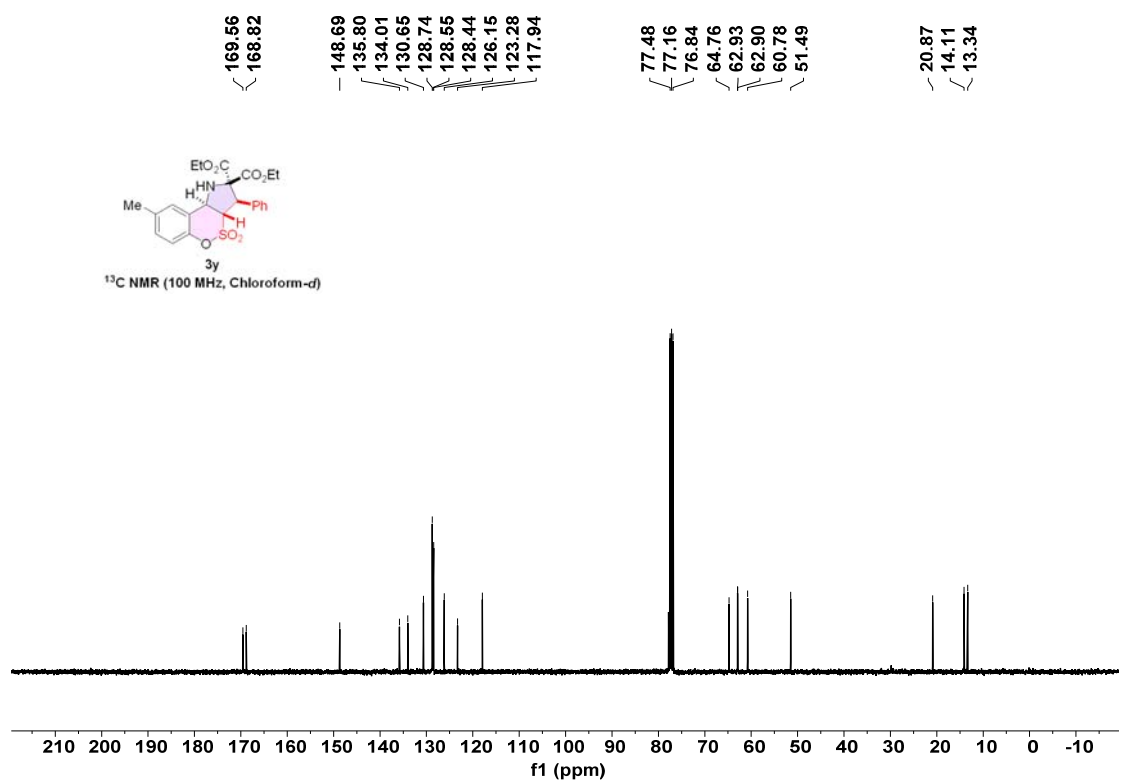

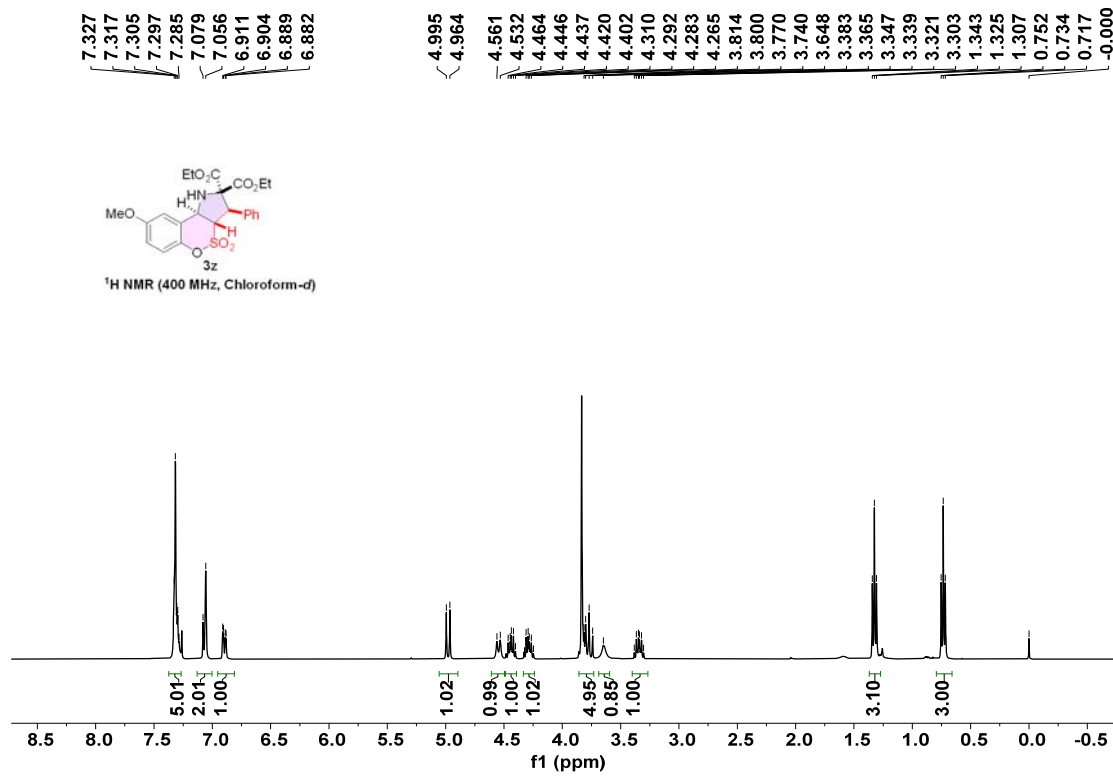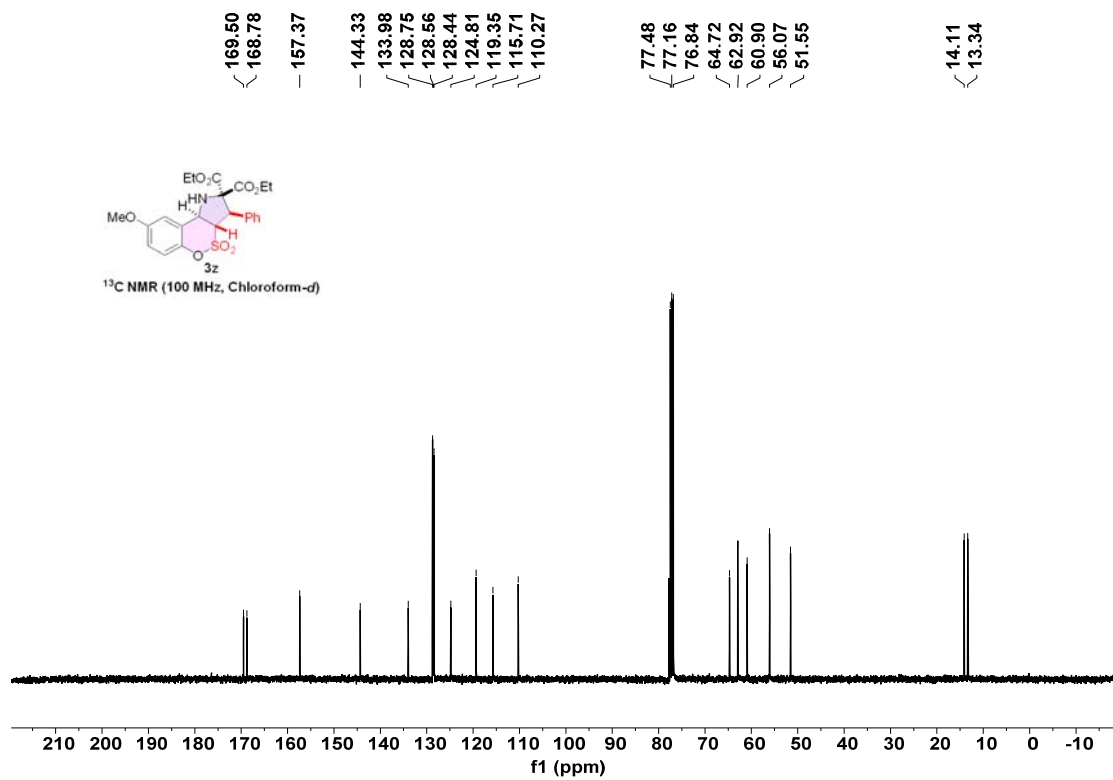



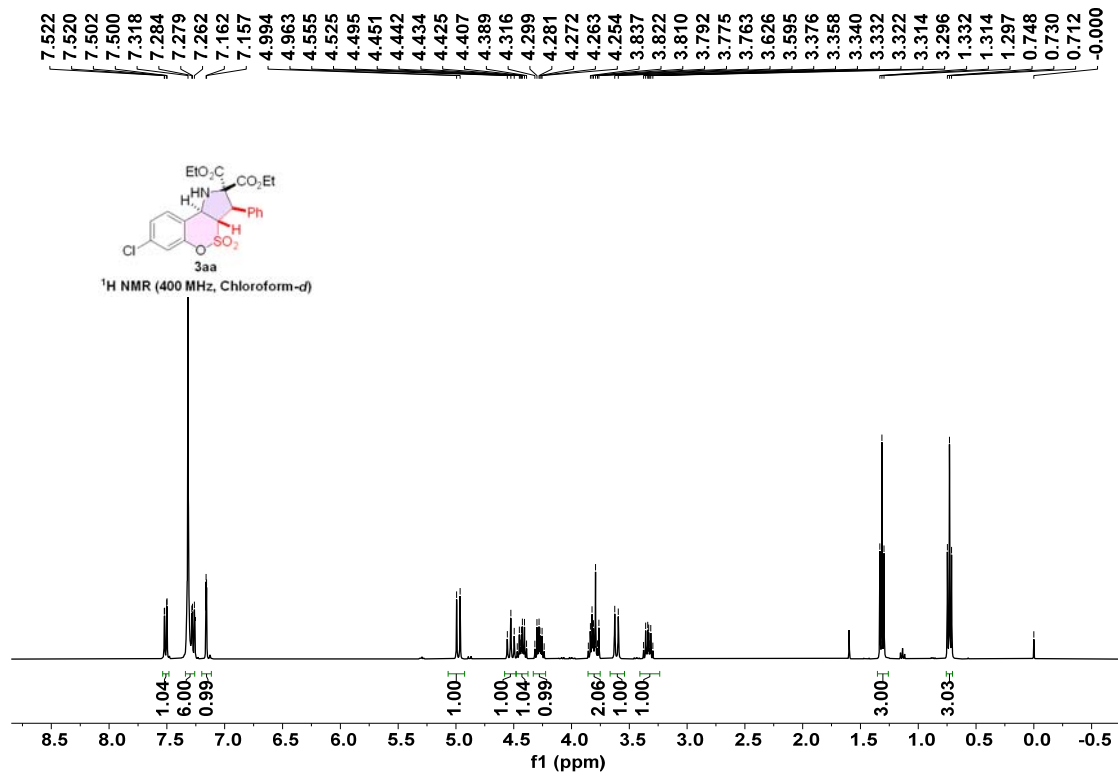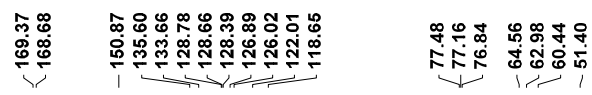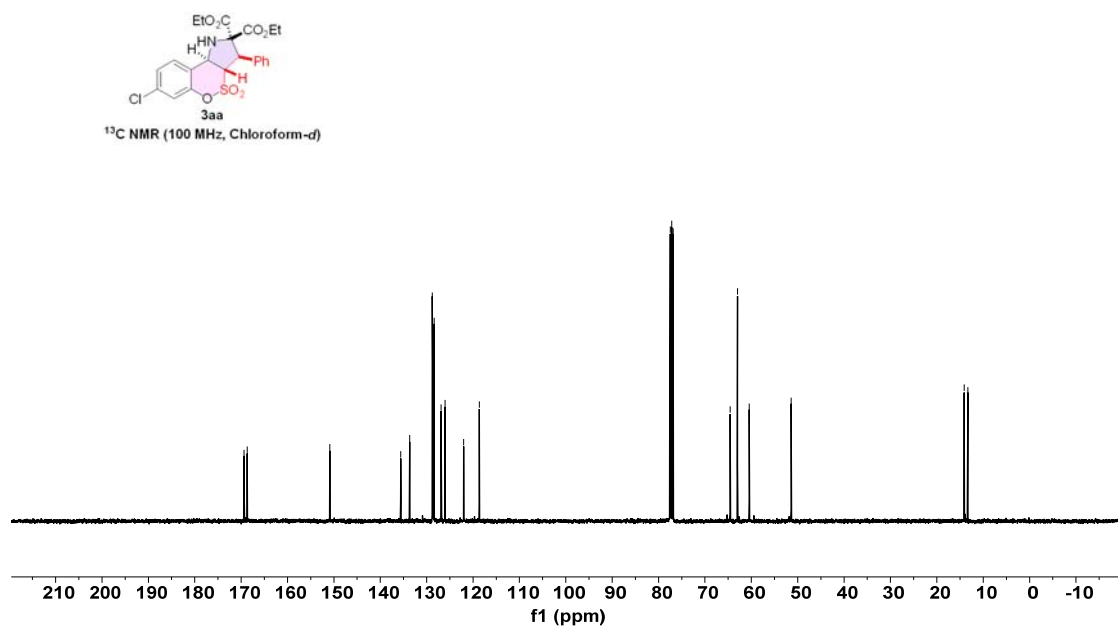

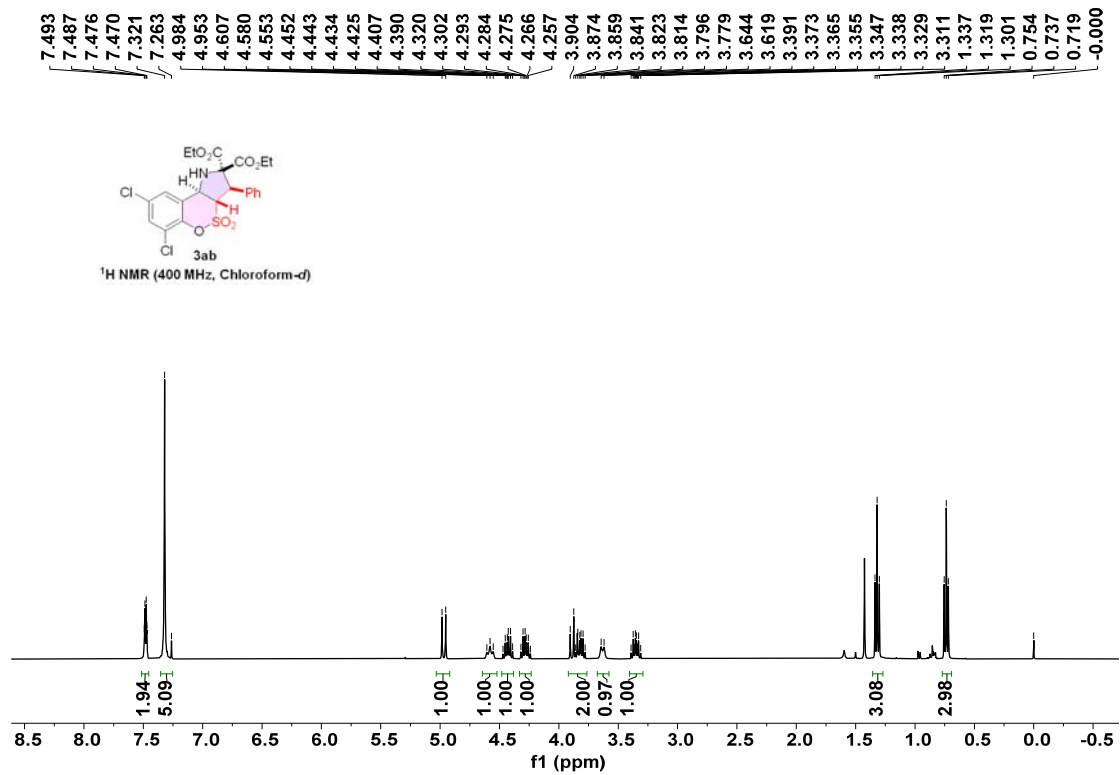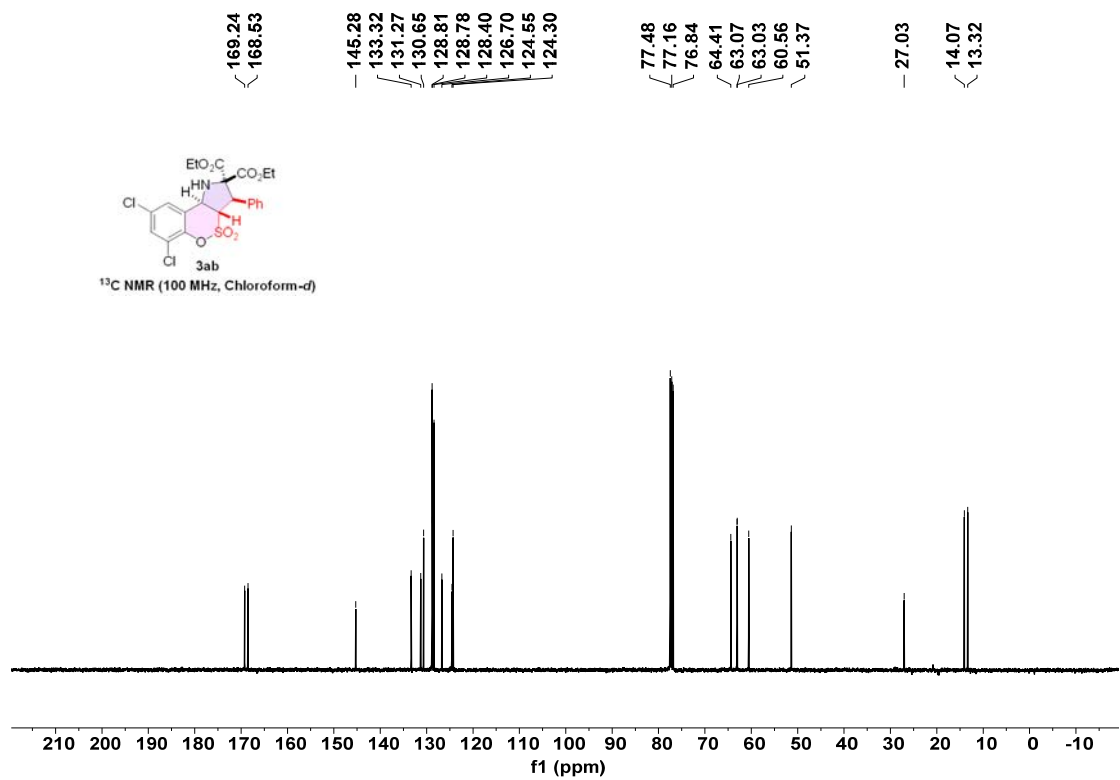

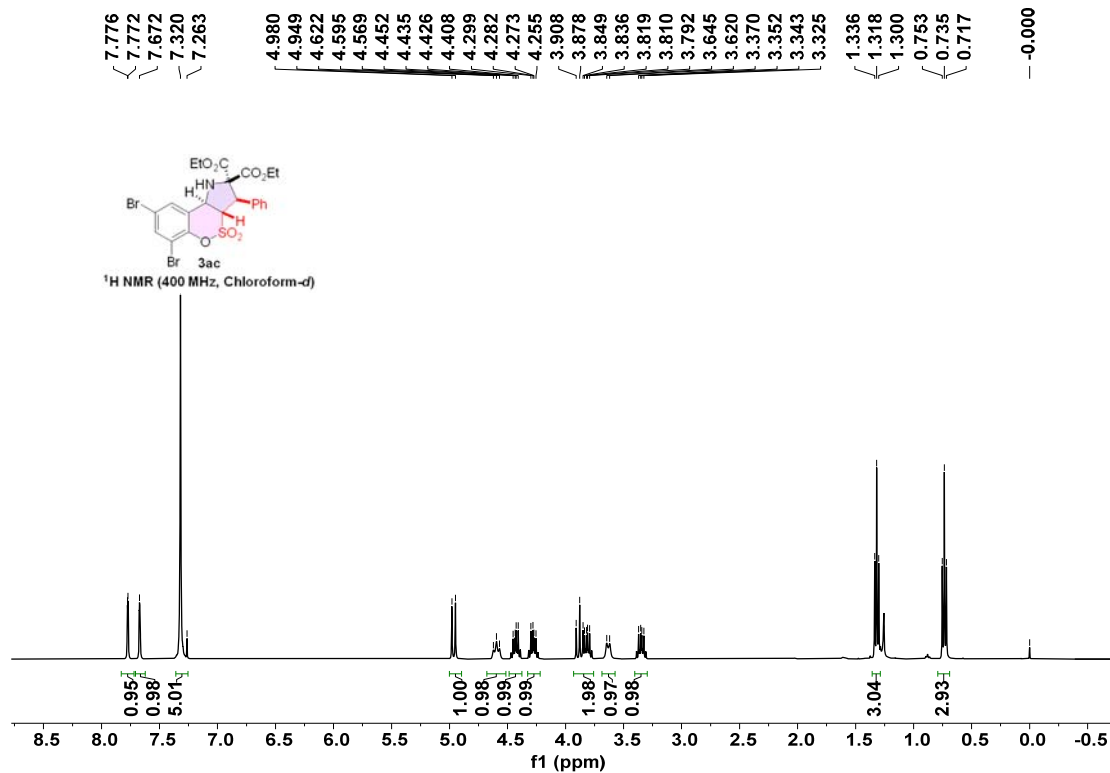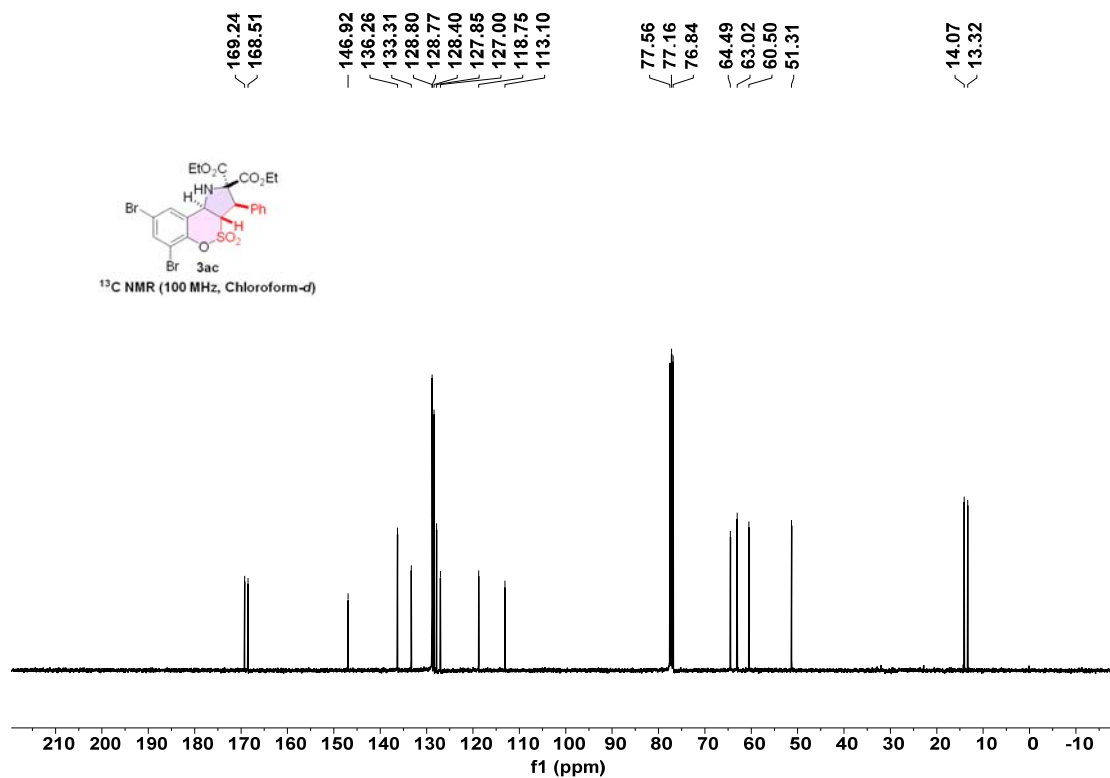

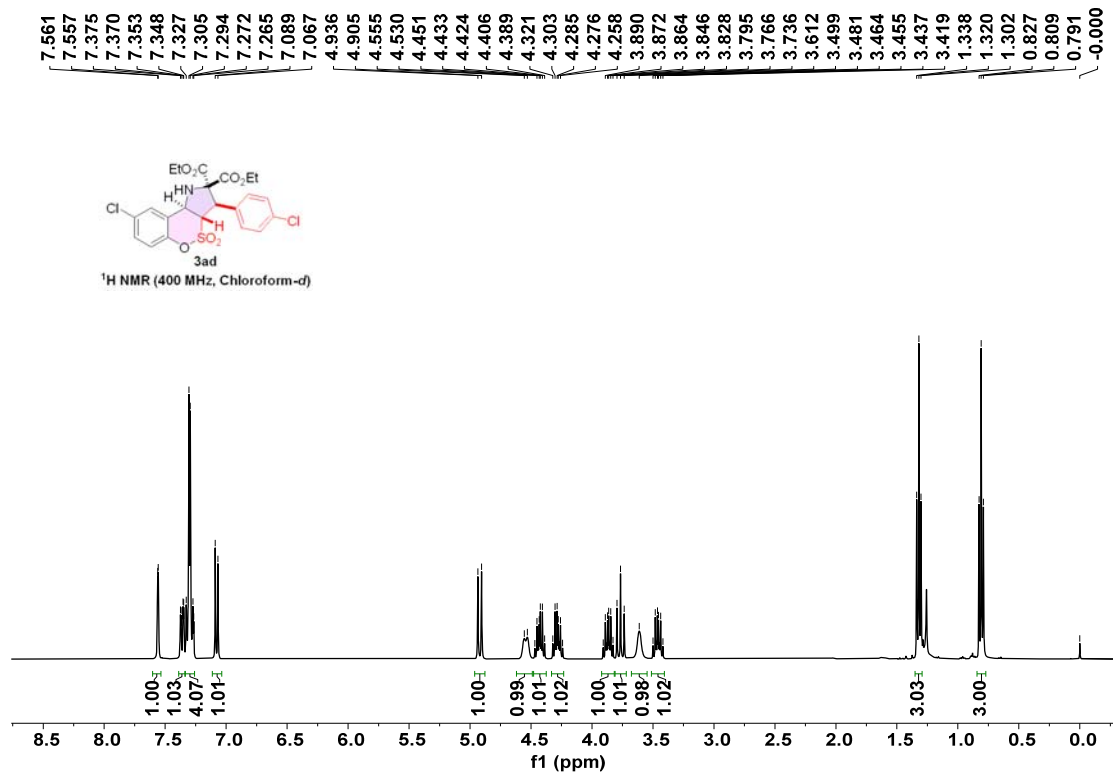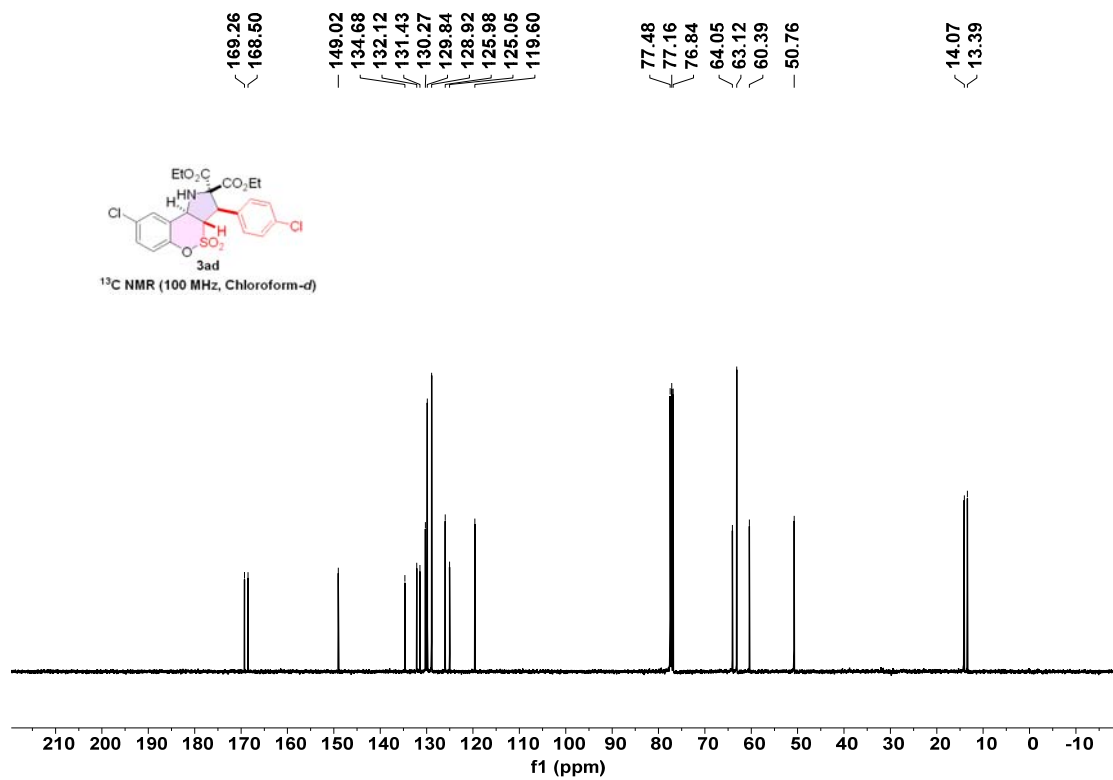

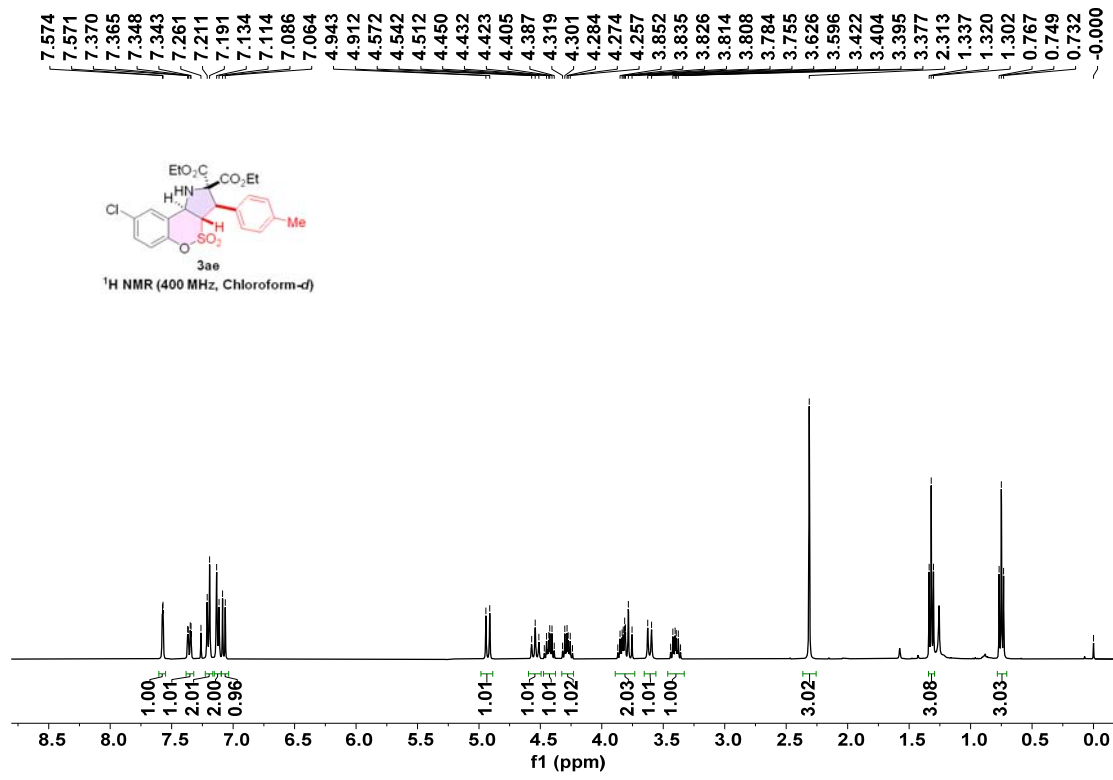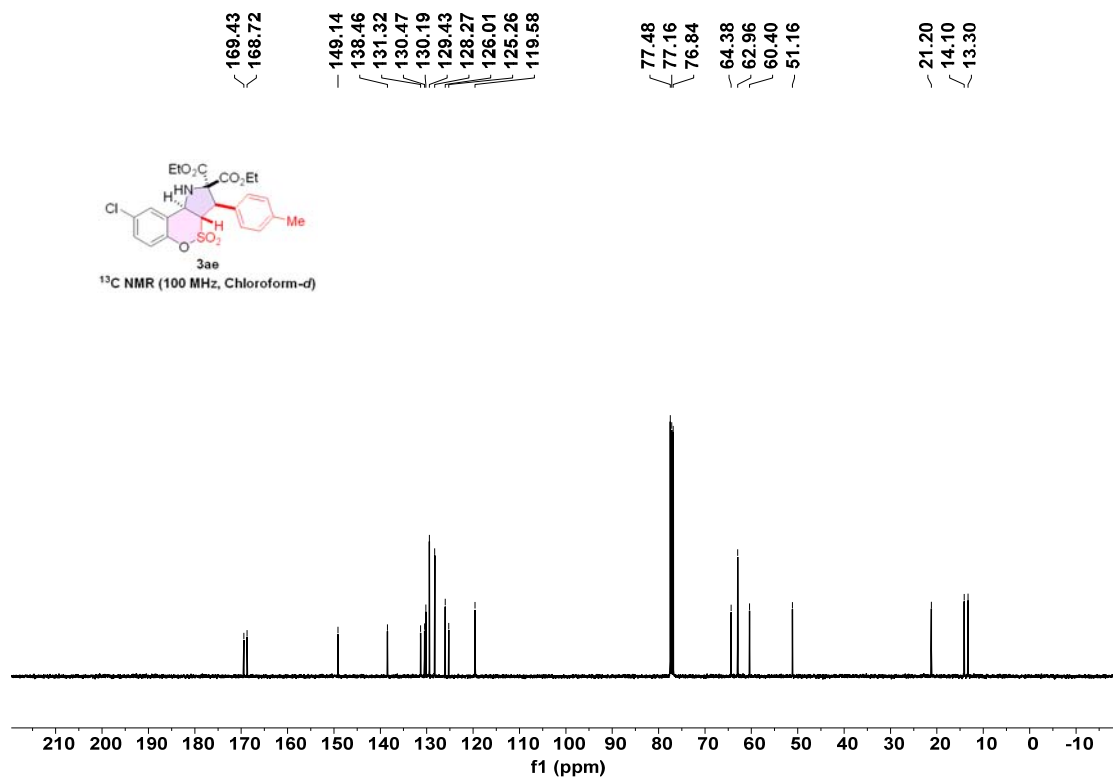

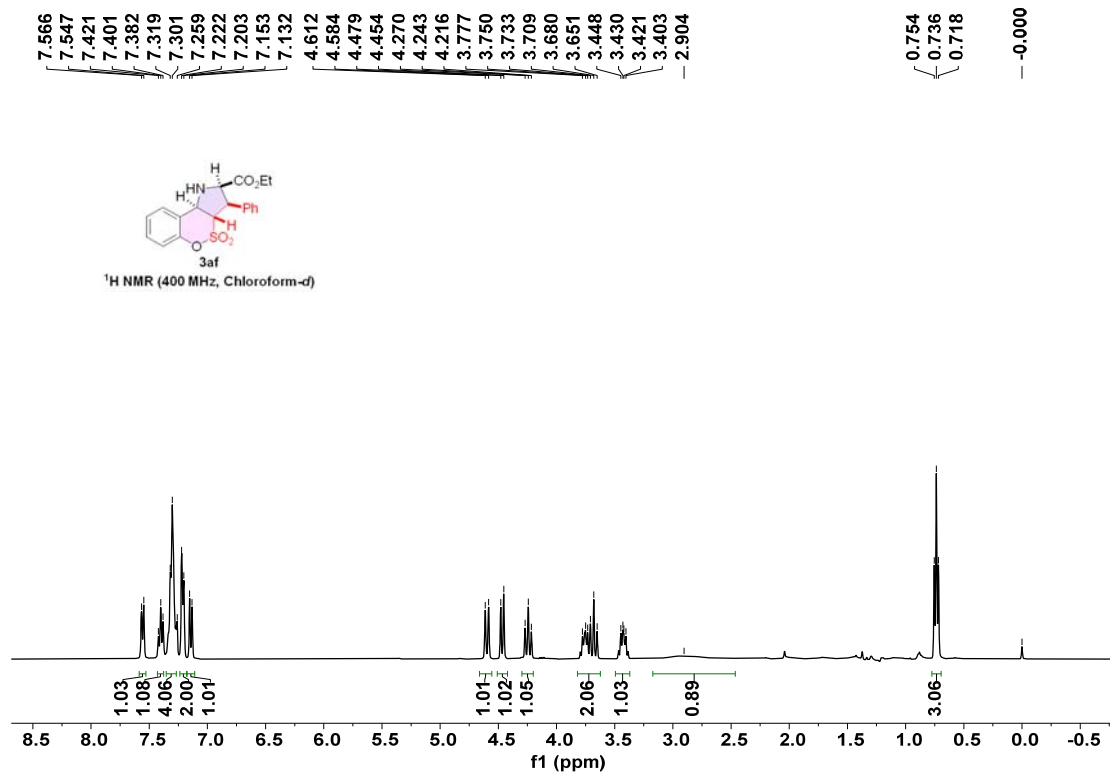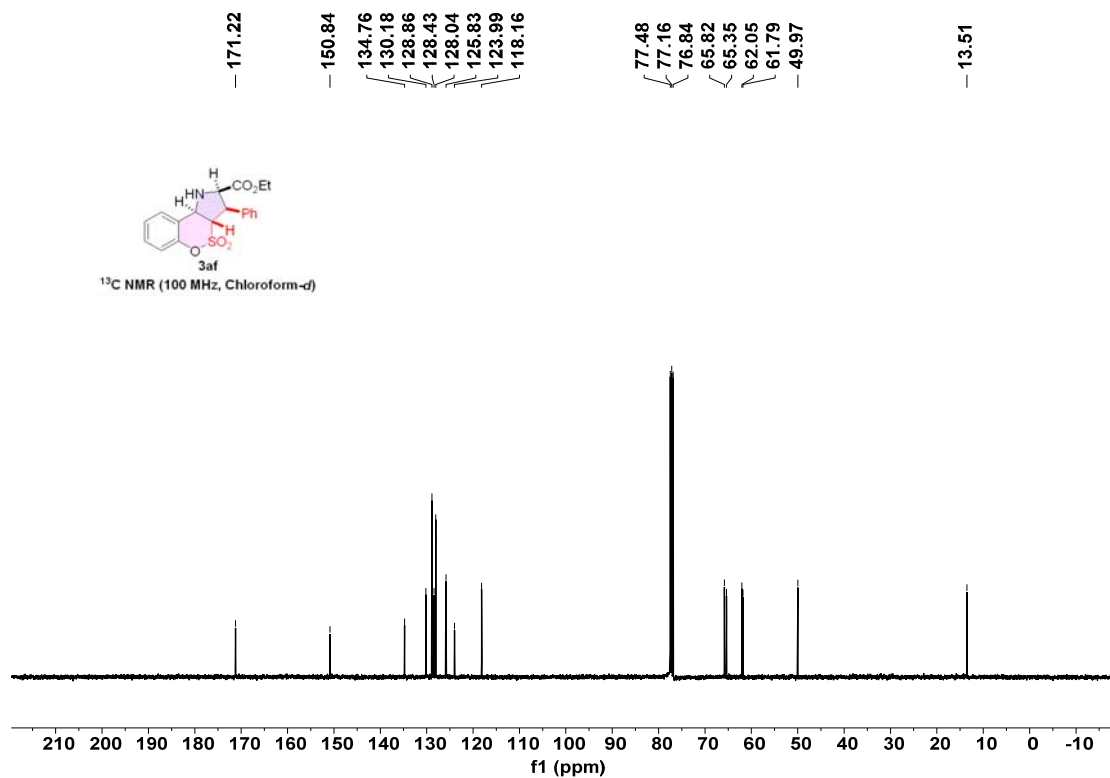

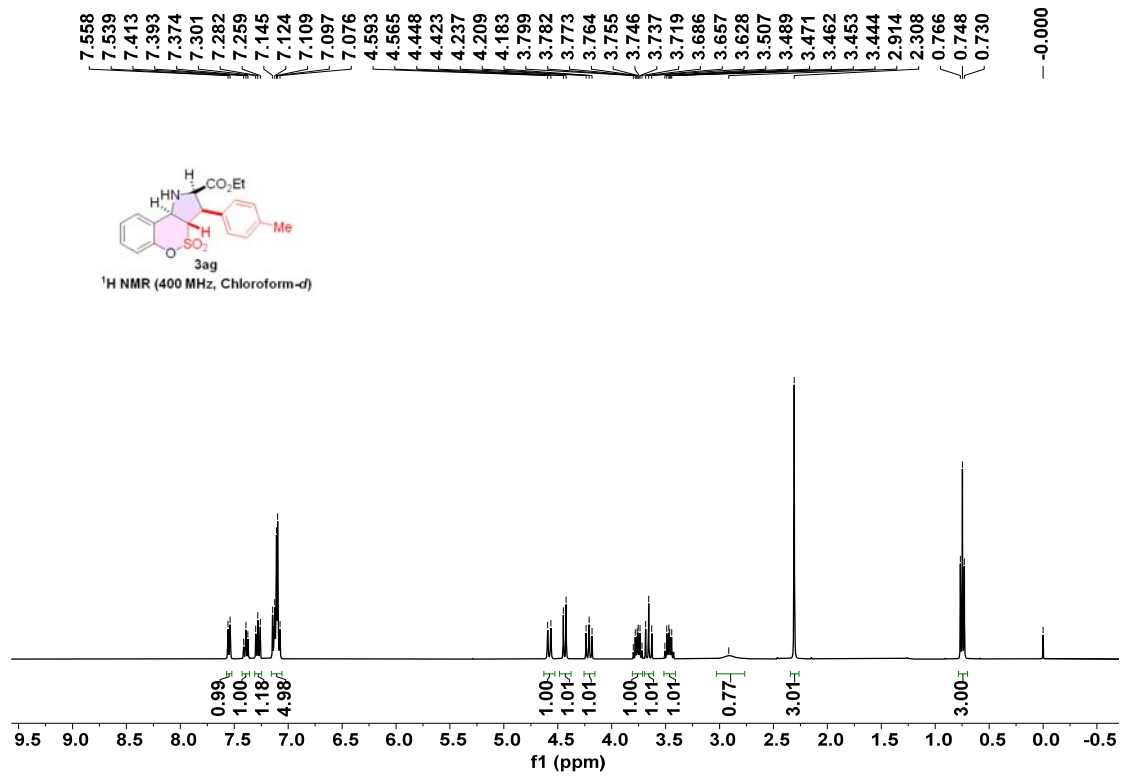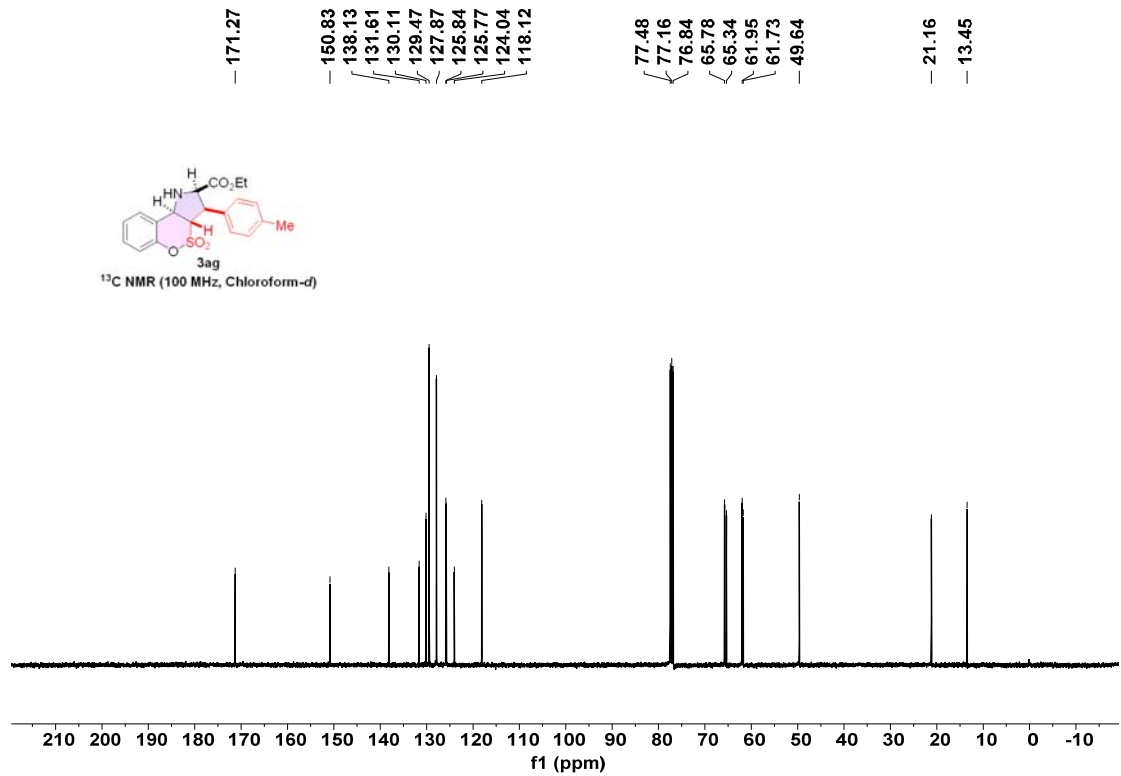

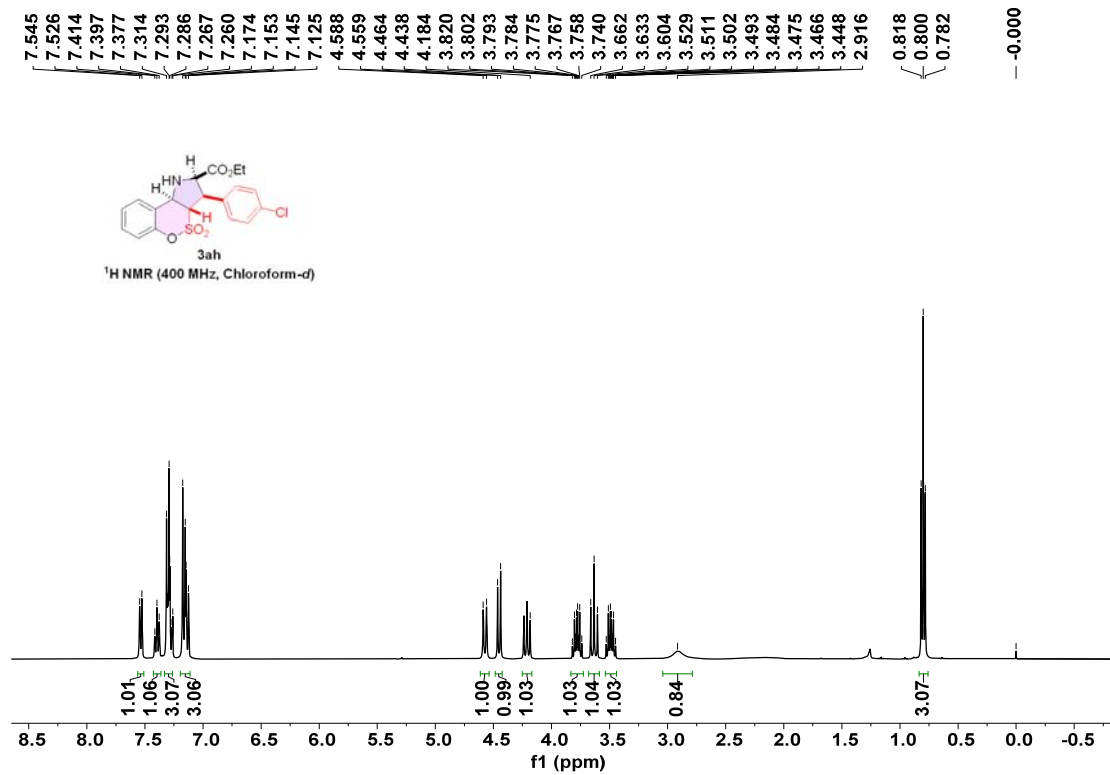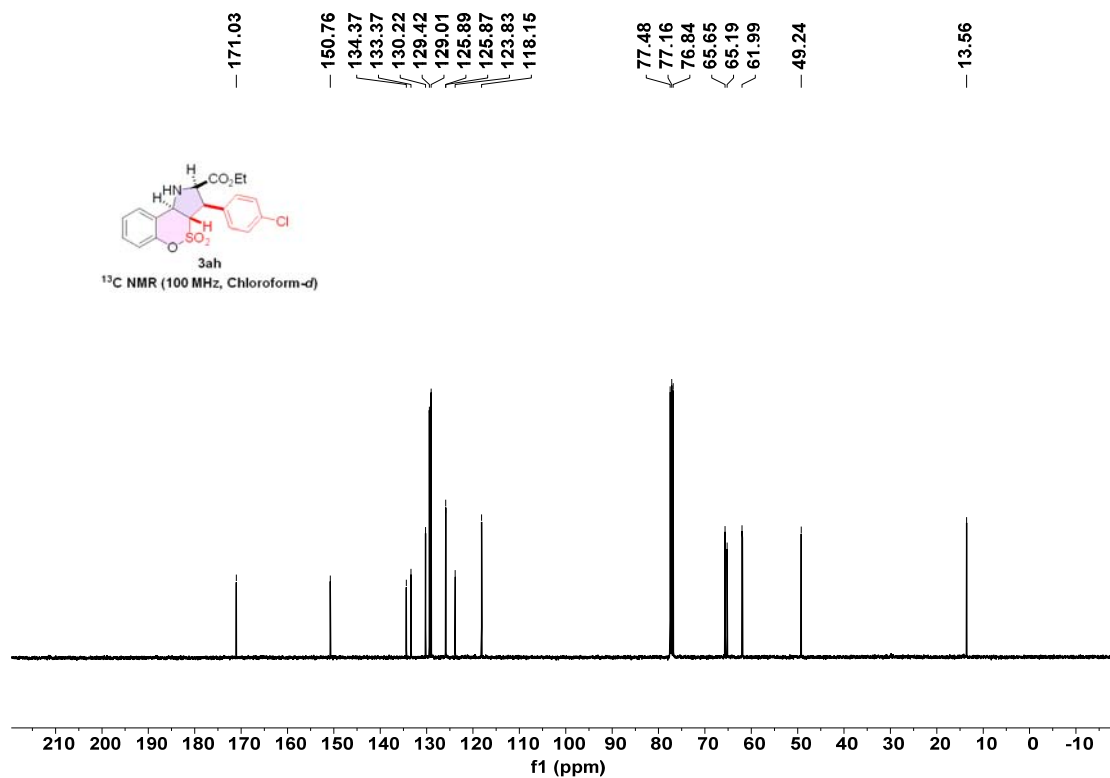



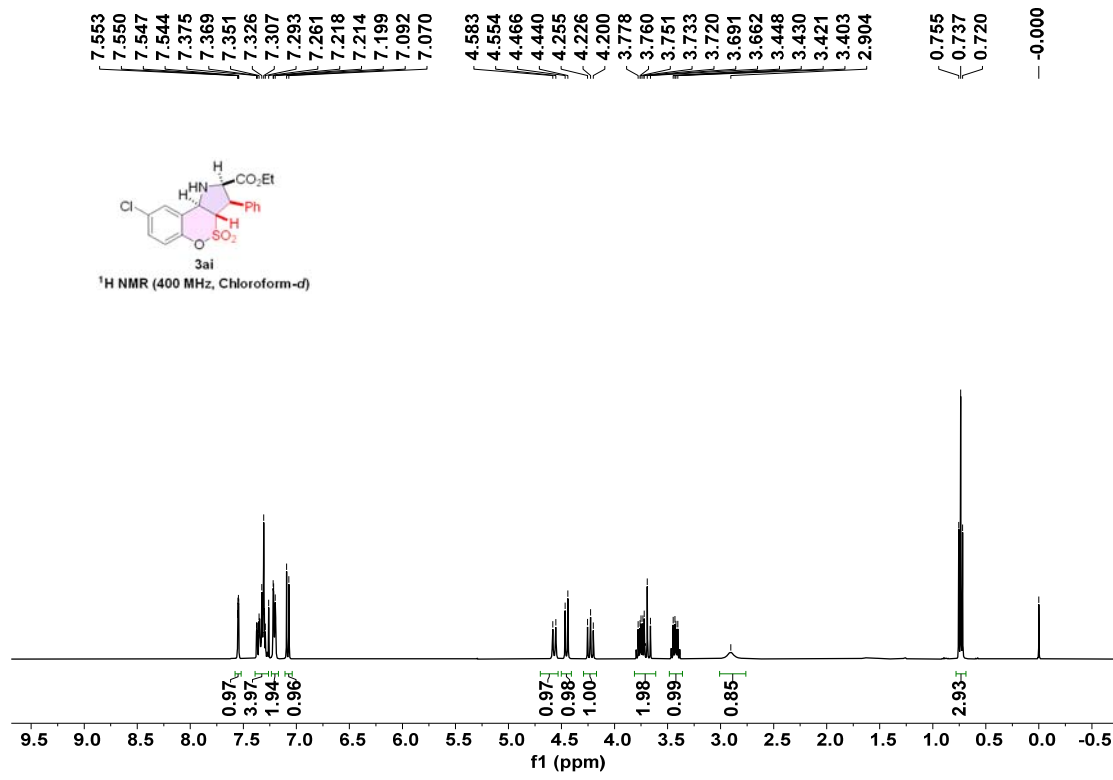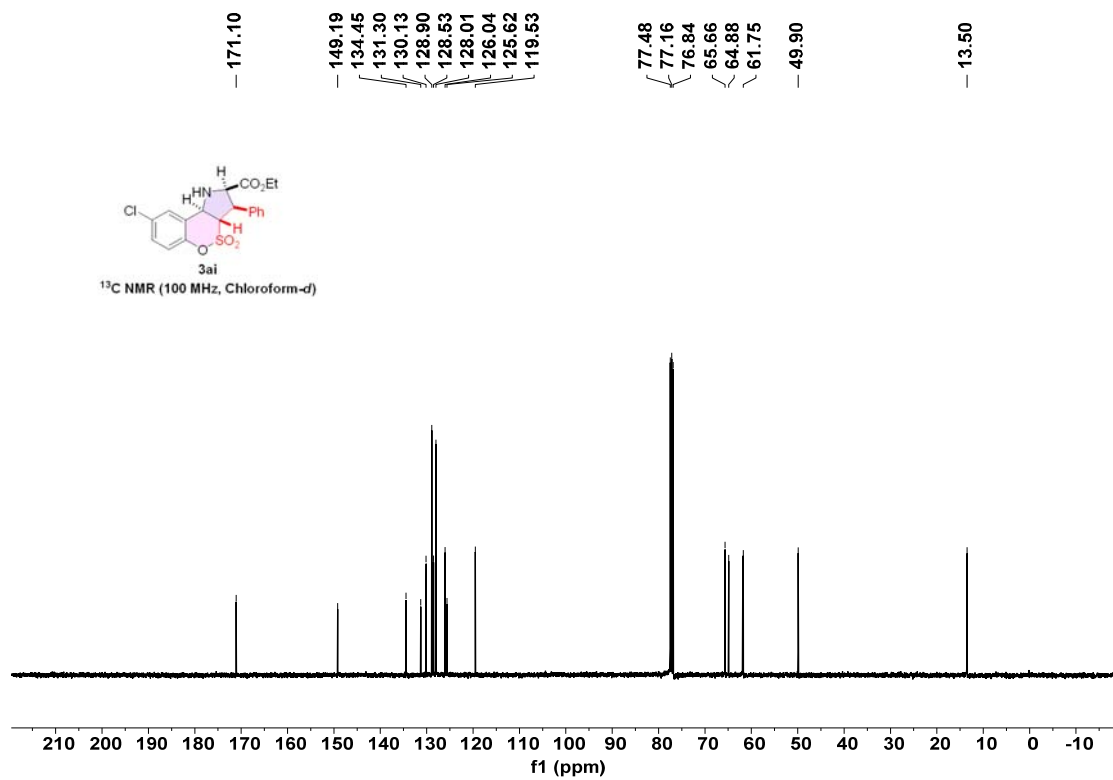

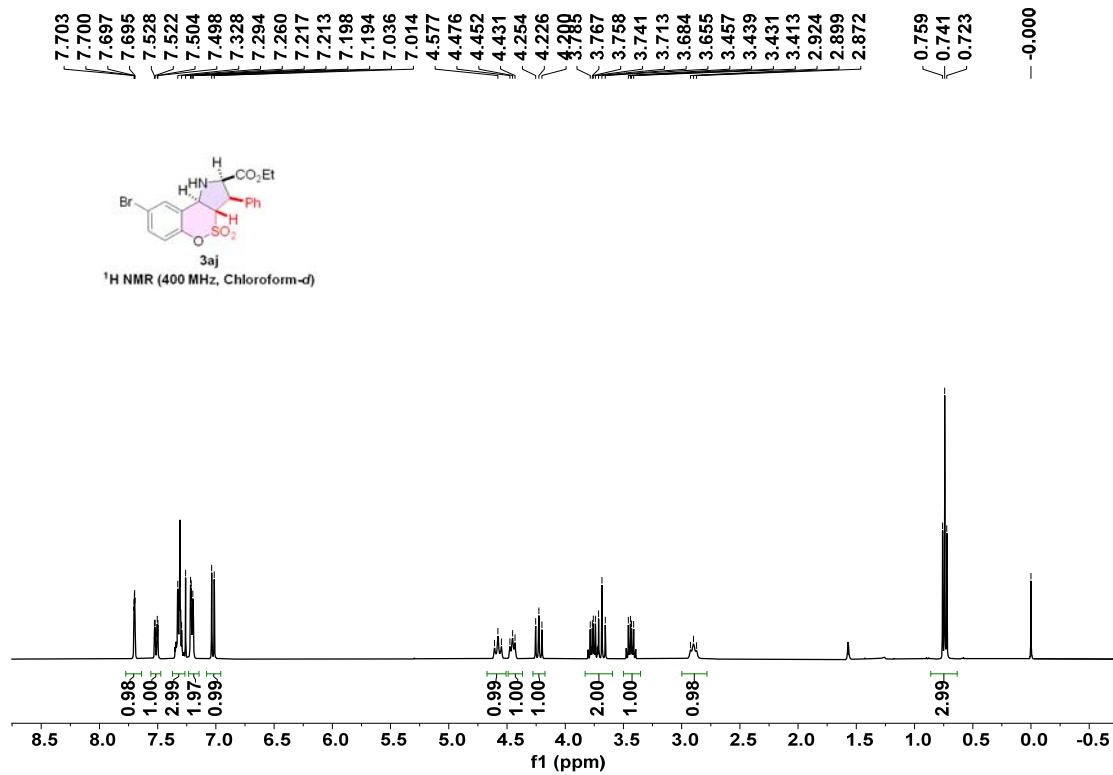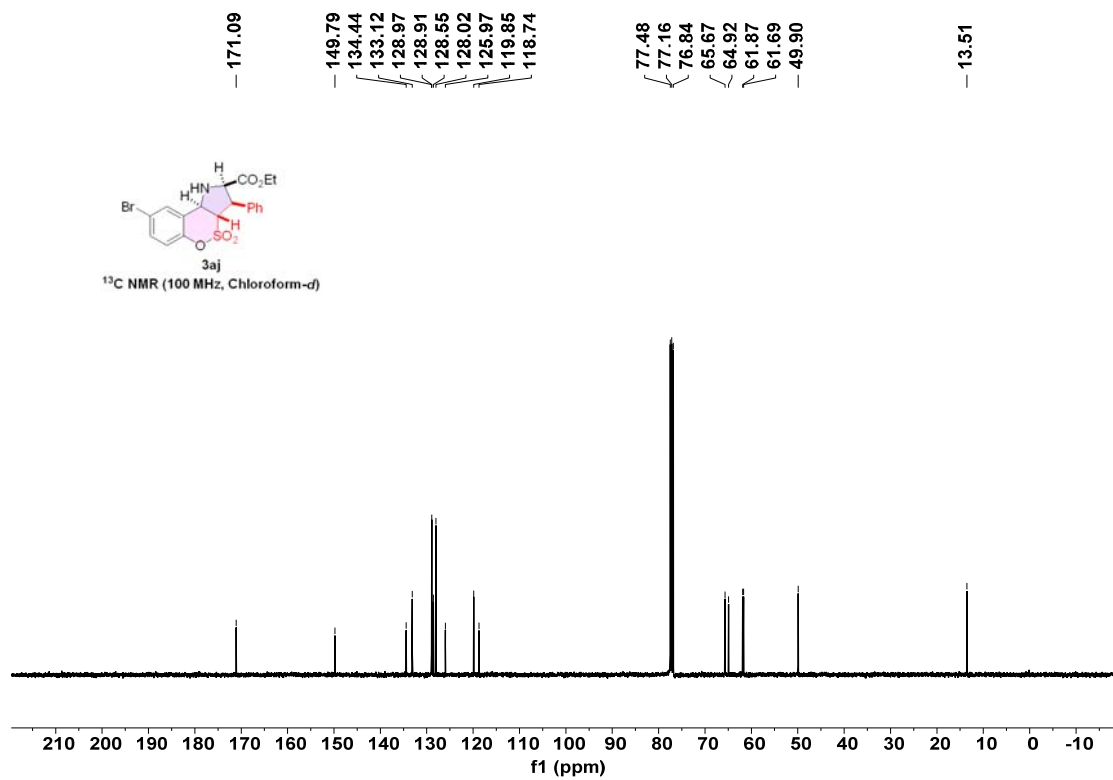

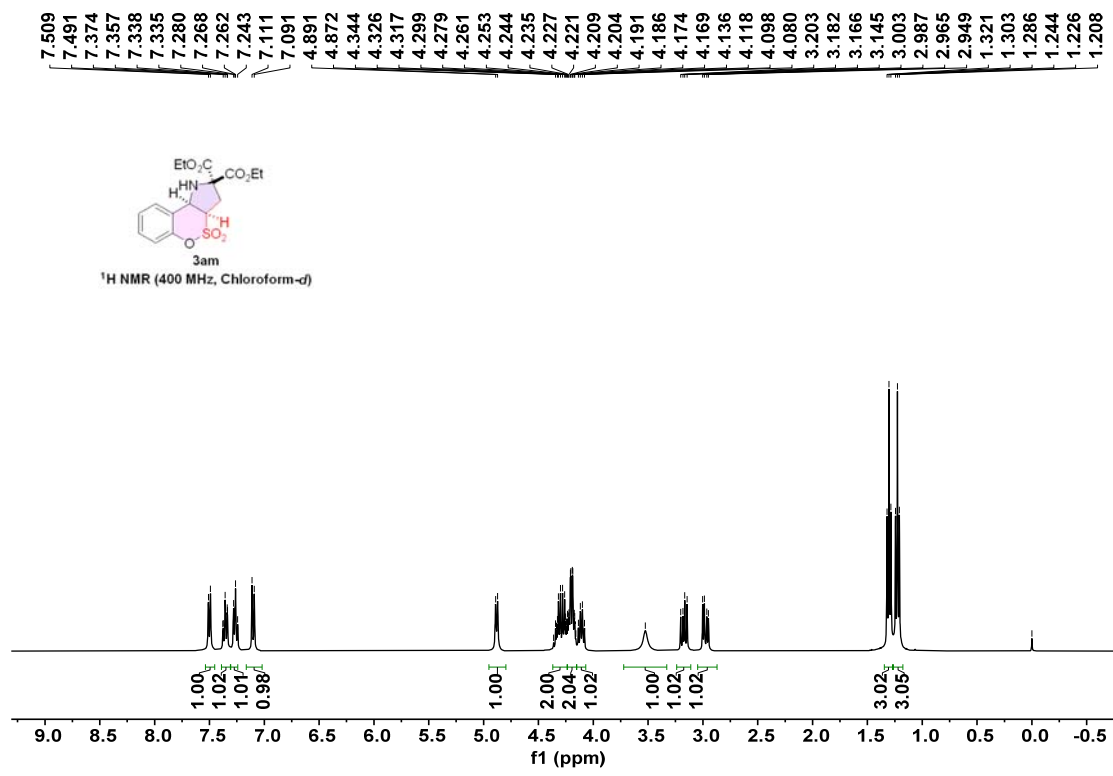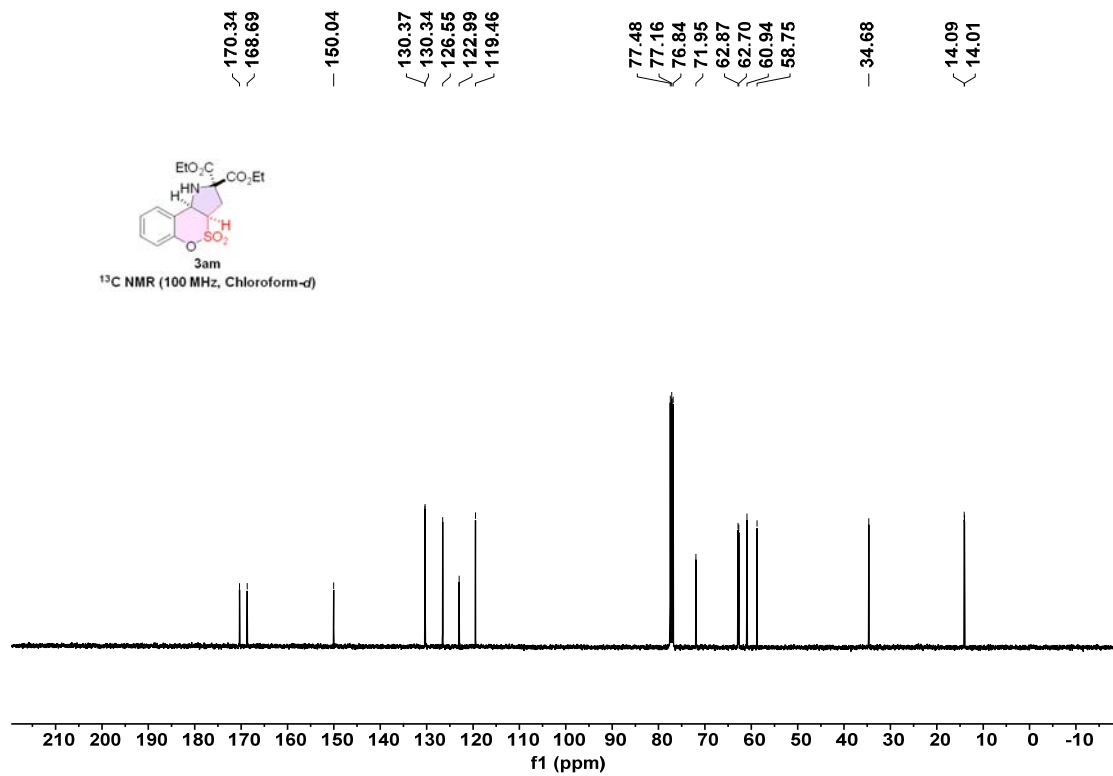

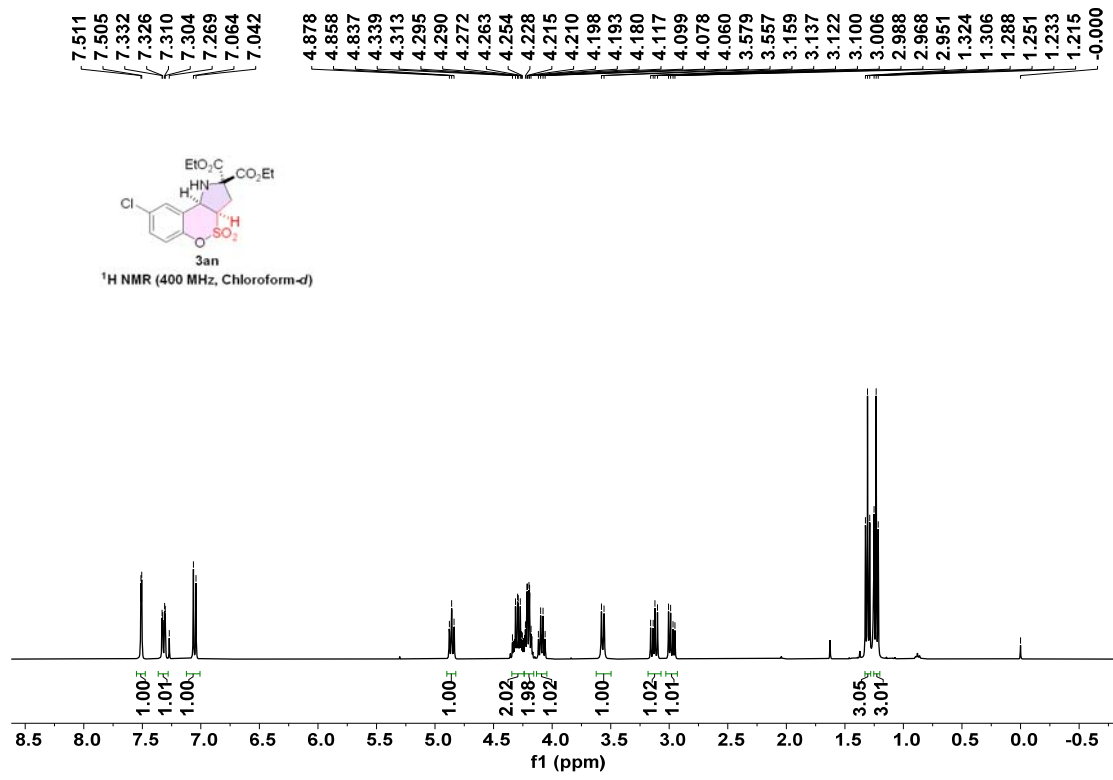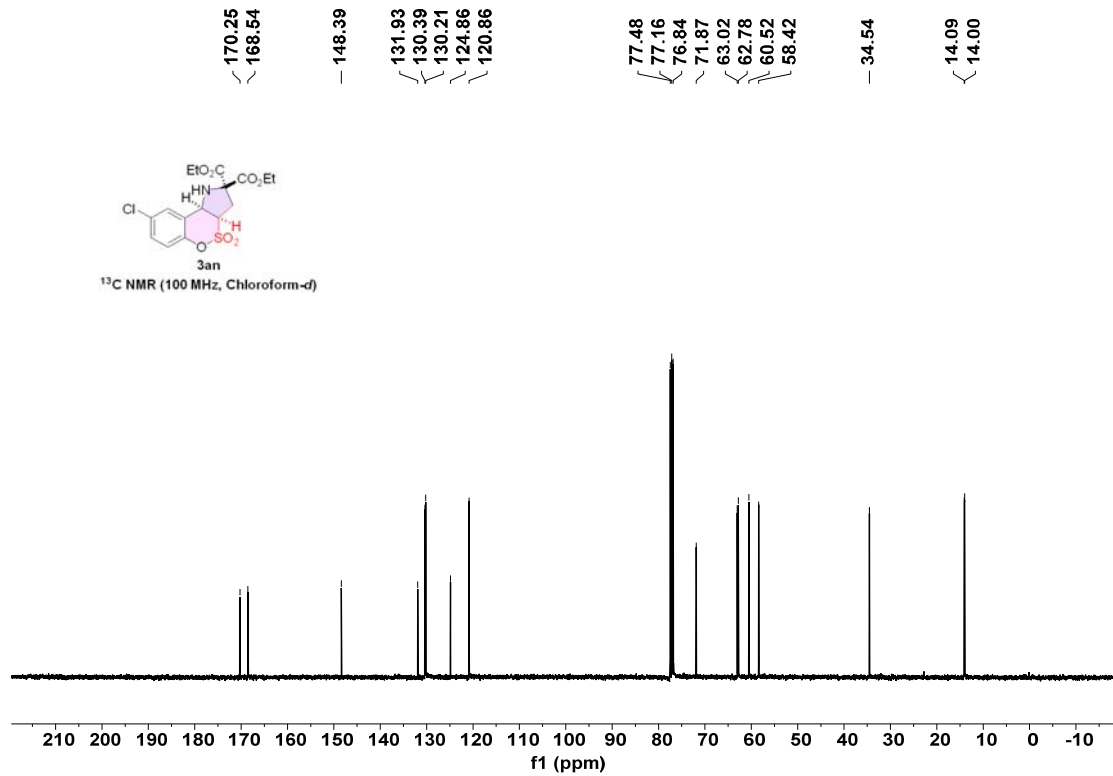

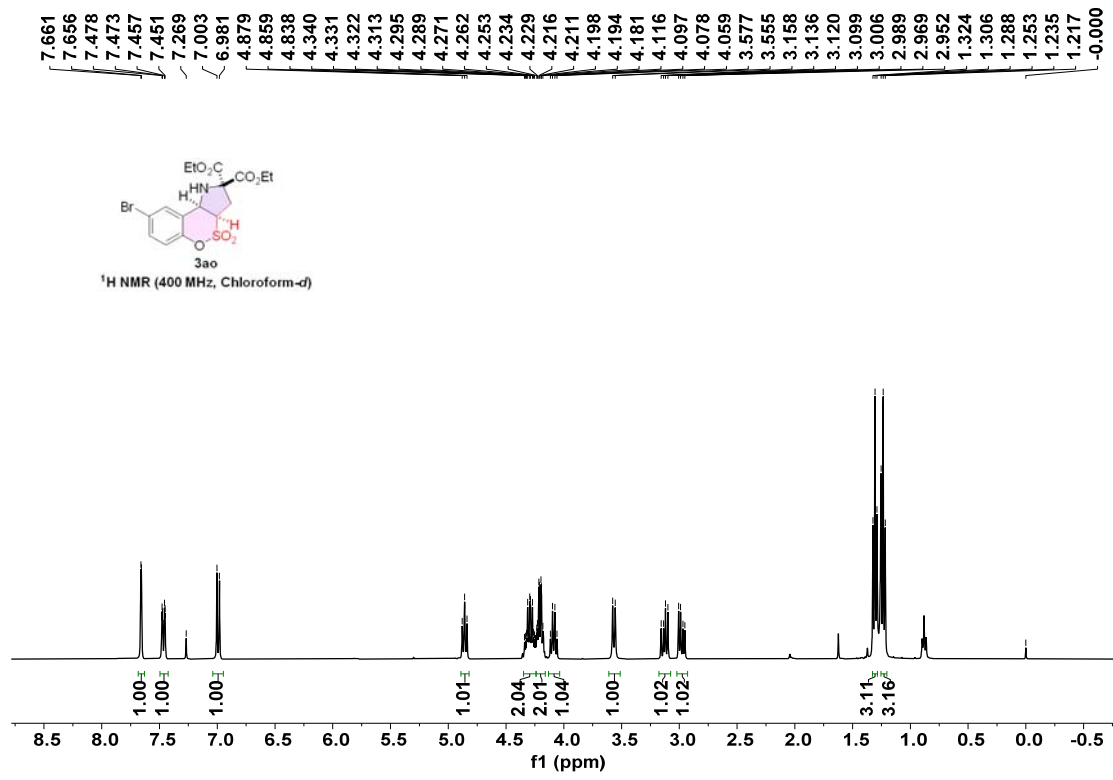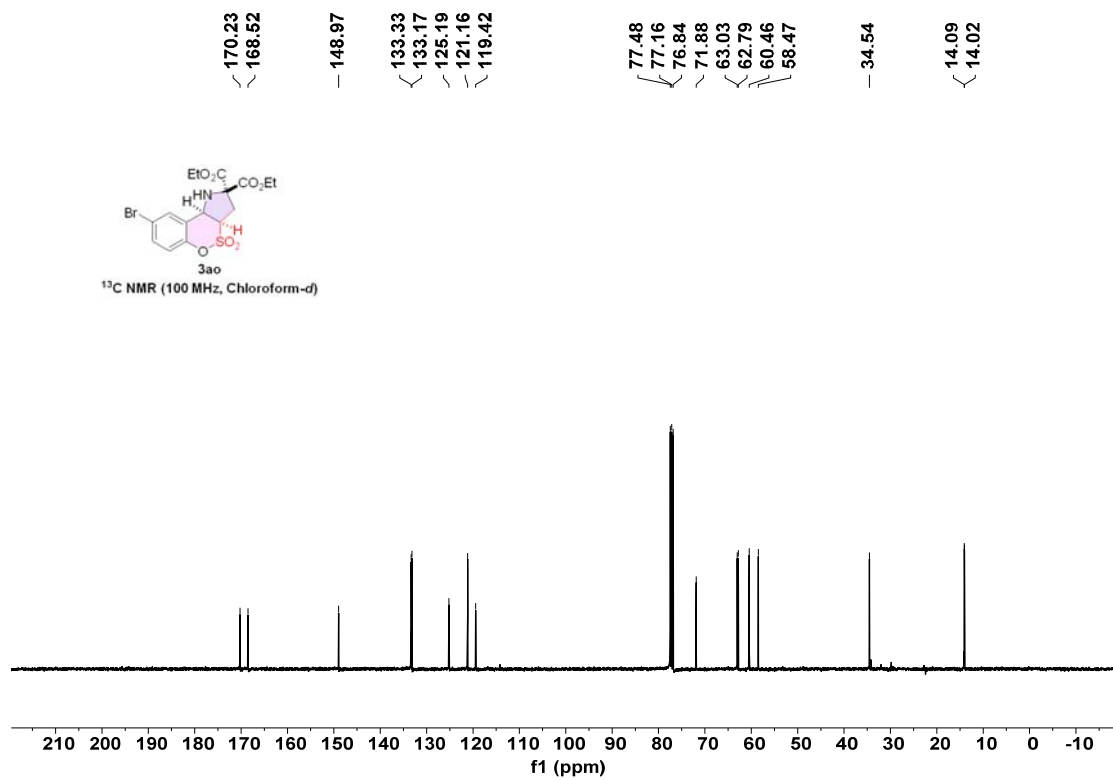

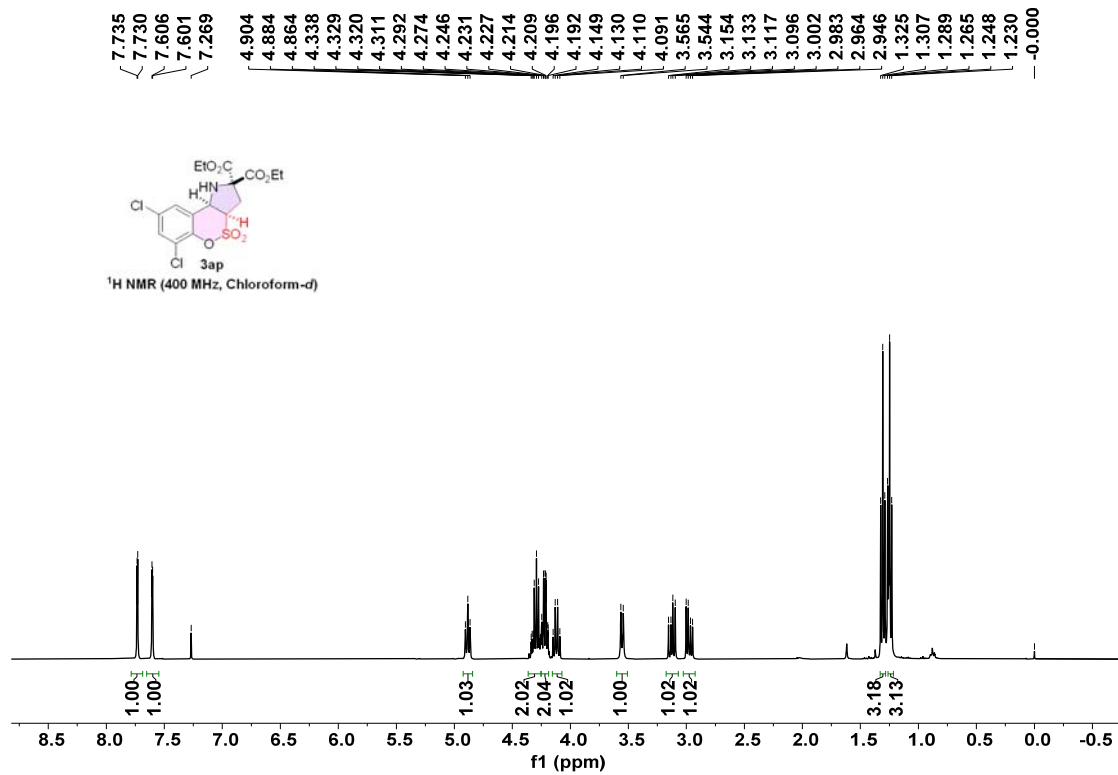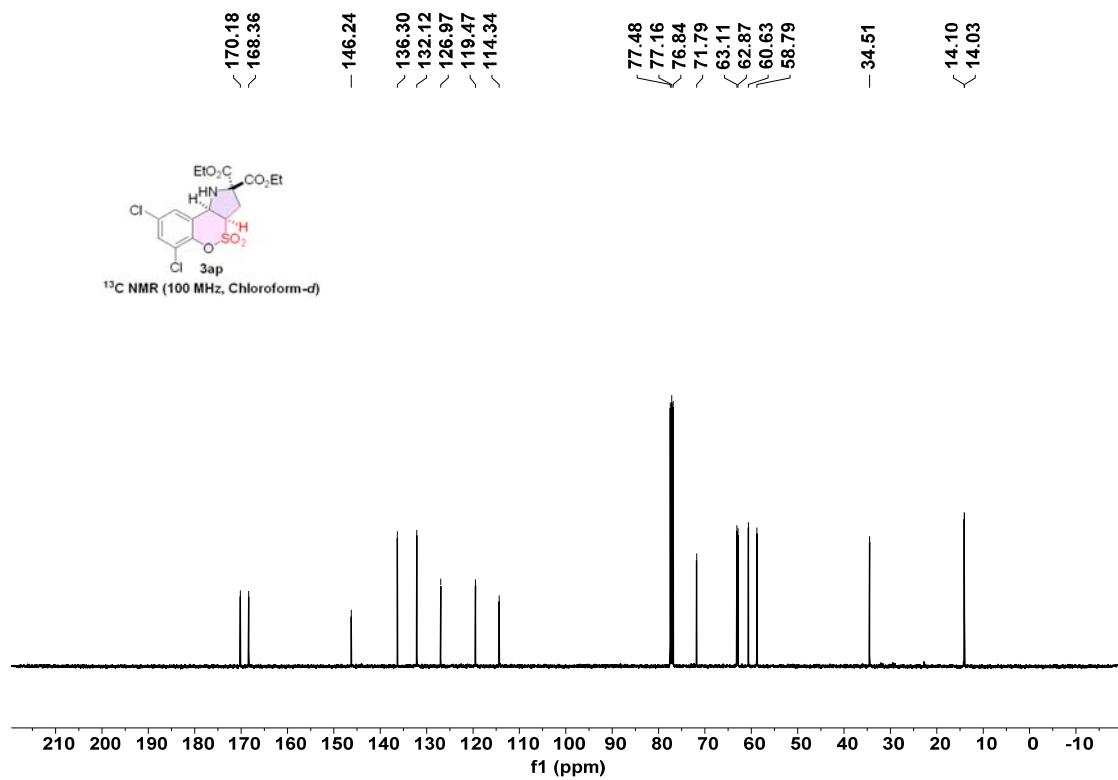

$\sim$  7.738  
 $\sim$  7.732  
 $\sim$  7.605  
 $\sim$  7.265  
 4.899  
 4.882  
 4.865  
 4.330  
 4.312  
 4.294  
 4.274  
 4.247  
 4.234  
 4.230  
 4.216  
 4.212  
 4.144  
 4.125  
 4.104  
 4.086  
 3.555  
 3.539  
 3.158  
 3.137  
 3.121  
 3.099  
 3.001  
 2.983  
 2.963  
 2.945  
 1.326  
 1.308  
 1.290  
 1.267  
 1.249  
 1.232  
 — 0.000

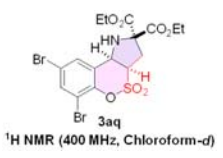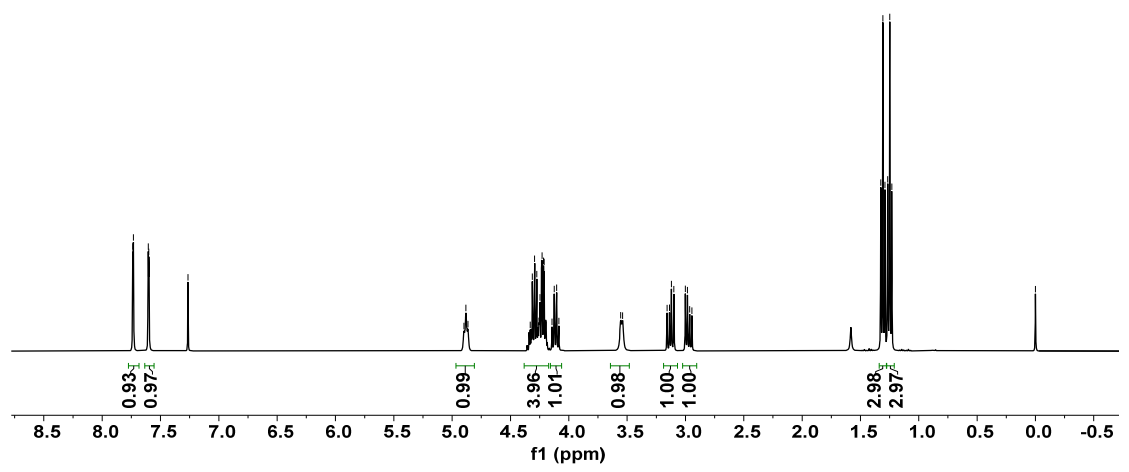

$\sim$  170.20  
 $\sim$  168.38  
 146.27  
 $\sim$  136.34  
 $\sim$  132.13  
 $\sim$  126.95  
 $\sim$  119.51  
 $\sim$  114.39  
 77.48  
 $\sim$  77.16  
 $\sim$  76.84  
 $\sim$  71.81  
 $\sim$  63.14  
 $\sim$  62.90  
 $\sim$  60.66  
 $\sim$  58.82  
 — 34.54  
 $\sim$  14.11  
 $\sim$  14.05

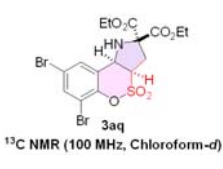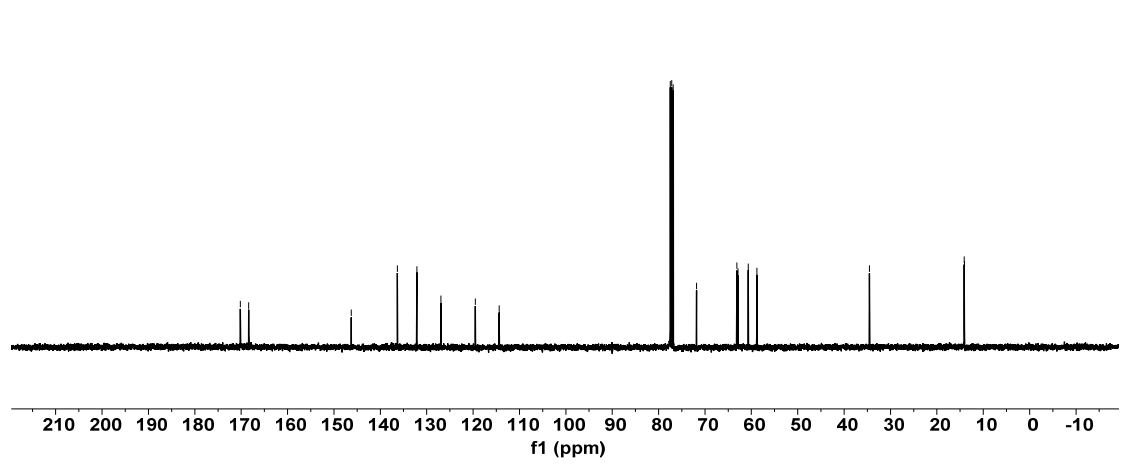

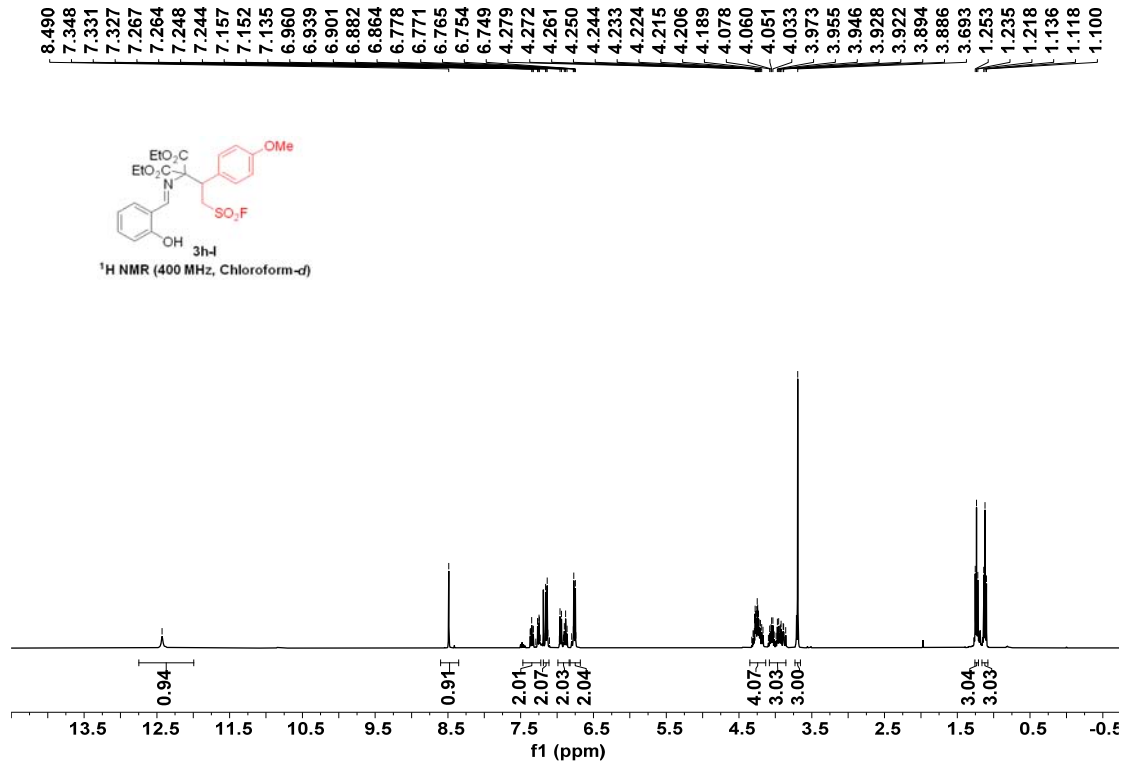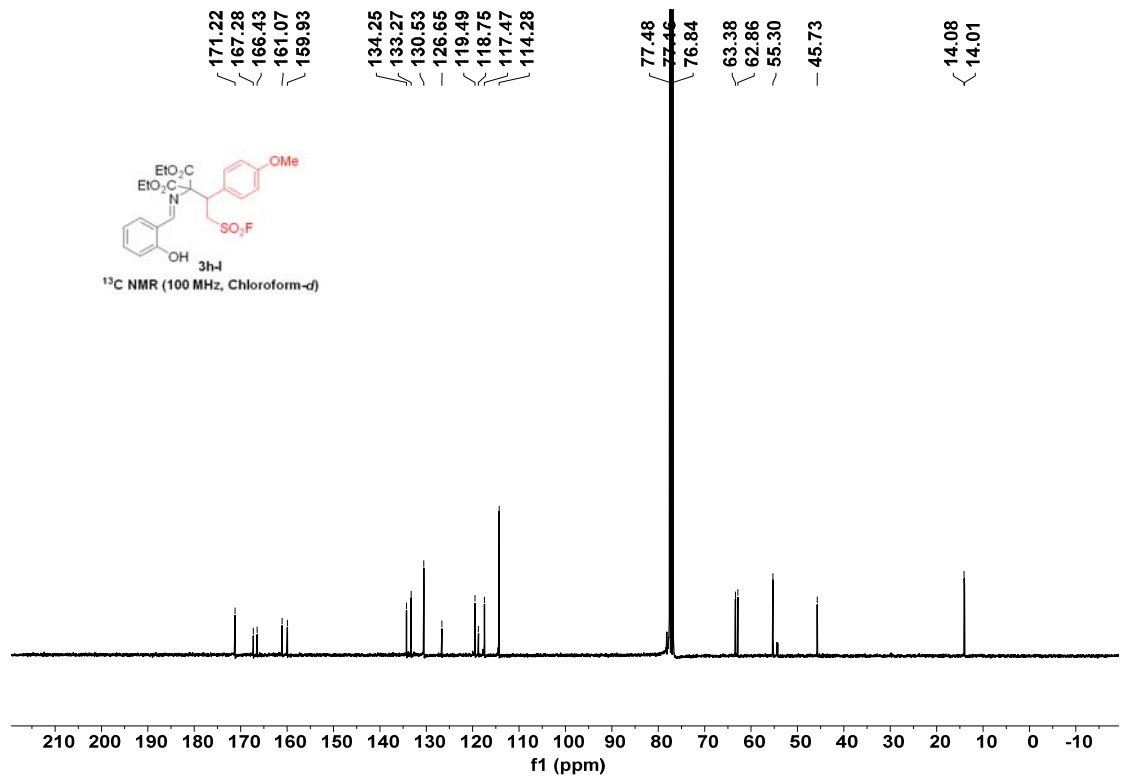



- 59.892

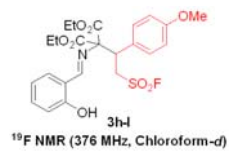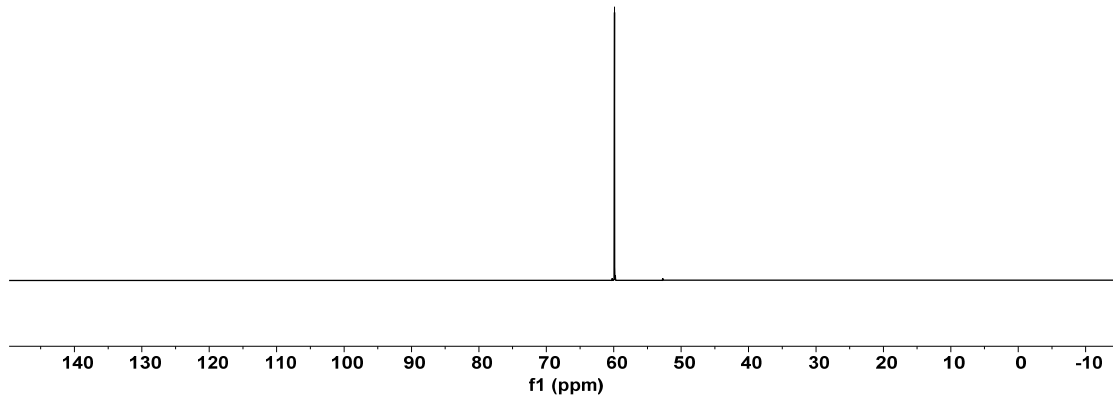

7.515  
7.512  
7.508  
7.496  
7.493  
7.489  
7.365  
7.347  
7.328  
7.292  
7.283  
7.278  
7.269  
7.252  
7.237  
7.218  
7.135  
7.130  
7.115  
7.112  
7.091  
7.071  
4.539  
4.515  
4.036  
4.008  
3.774  
3.753  
3.745  
3.736  
3.727  
3.720  
3.709  
3.691  
3.400  
3.382  
3.374  
3.364  
3.356  
3.346  
3.338  
3.320  
2.607  
1.544  
0.687  
0.669  
0.651

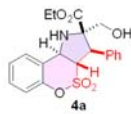

<sup>1</sup>H NMR (400 MHz, Chloroform-d)

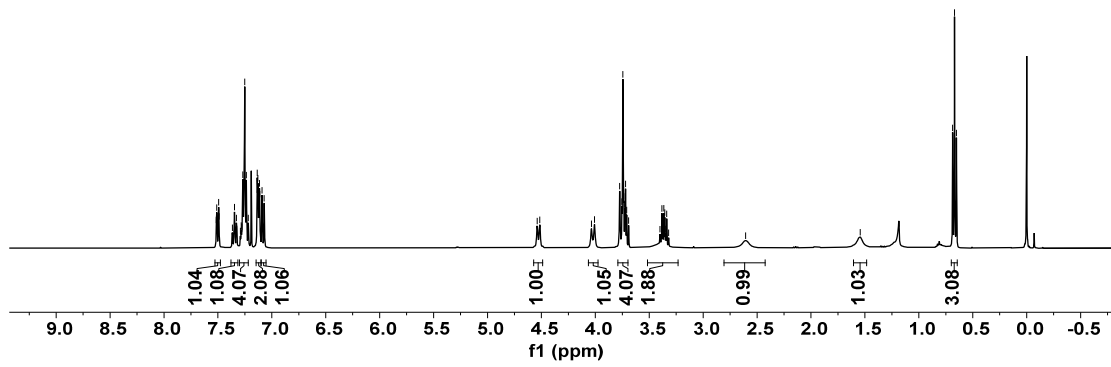

171.58  
150.84  
134.35  
130.32  
129.02  
128.64  
127.94  
125.90  
125.75  
123.65  
118.29  
77.48  
77.16  
76.84  
65.31  
65.16  
62.58  
60.34  
52.59  
13.39

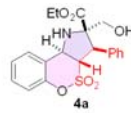

<sup>13</sup>C NMR (100 MHz, Chloroform-d)

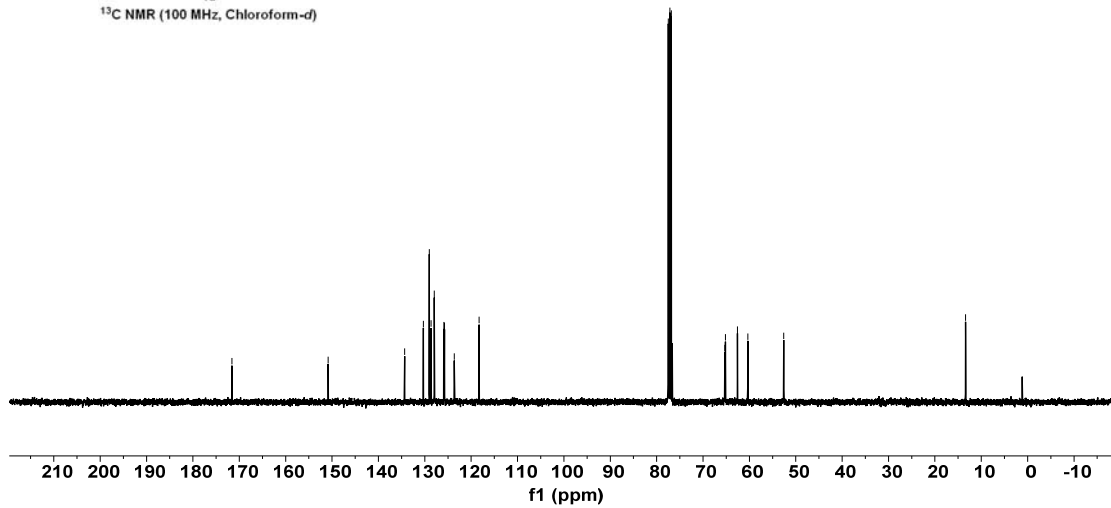

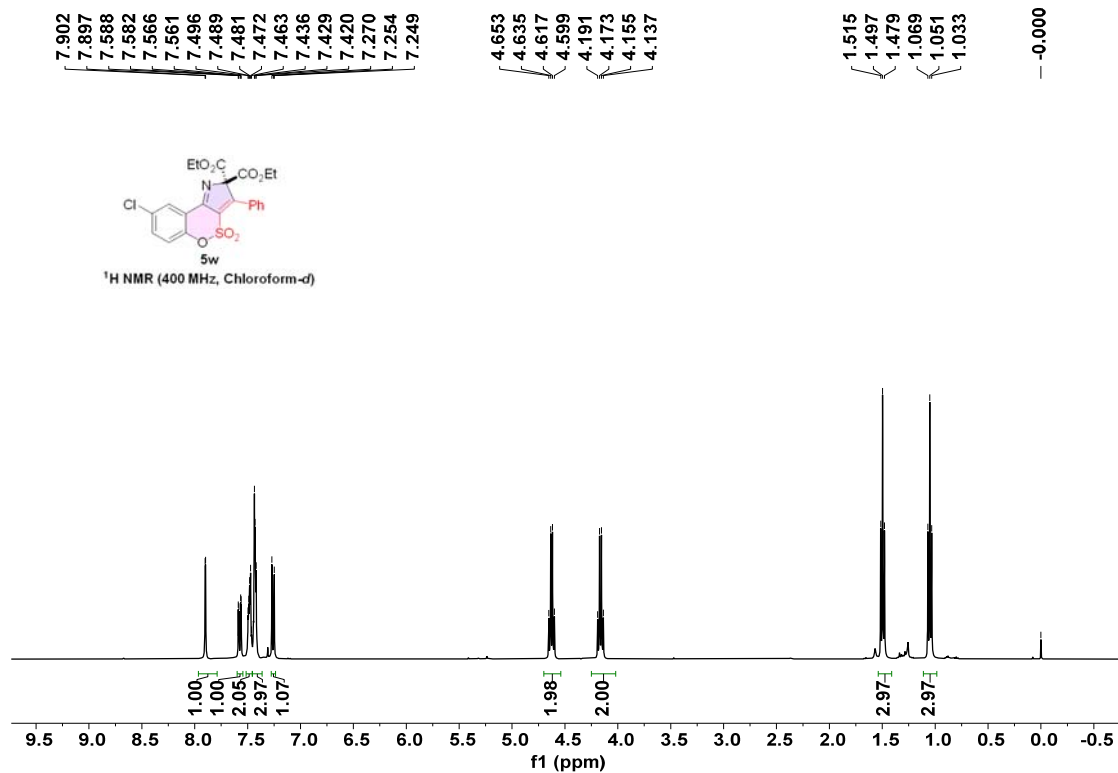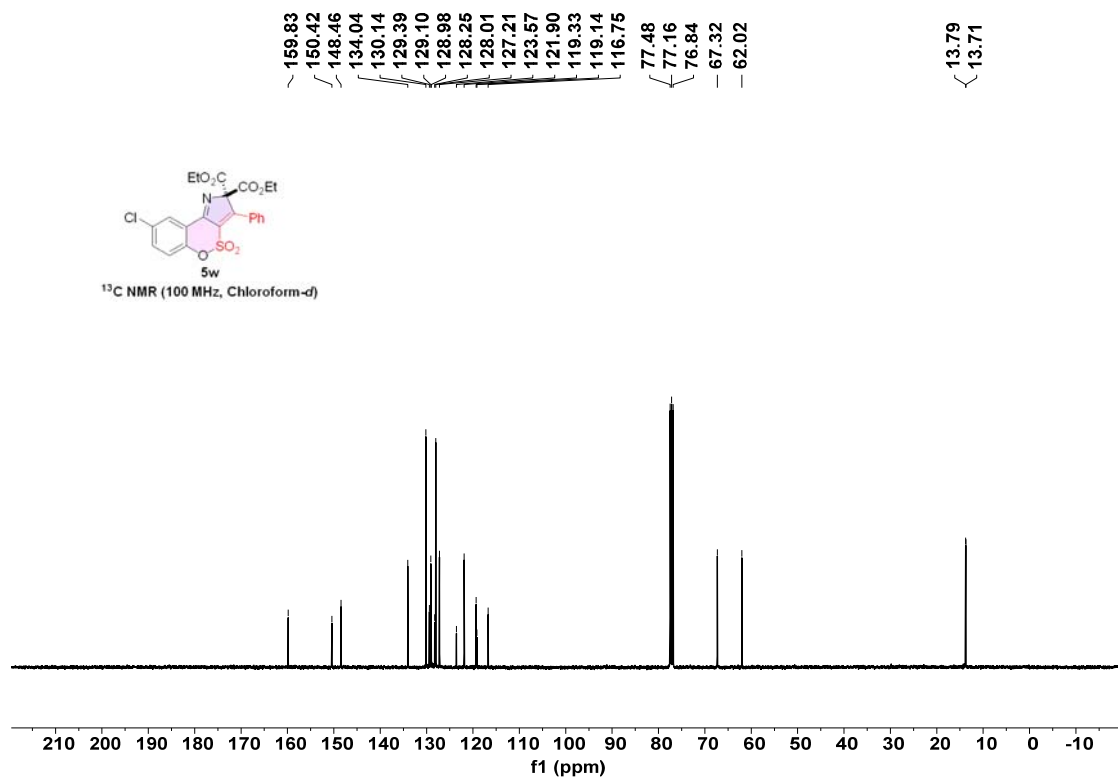

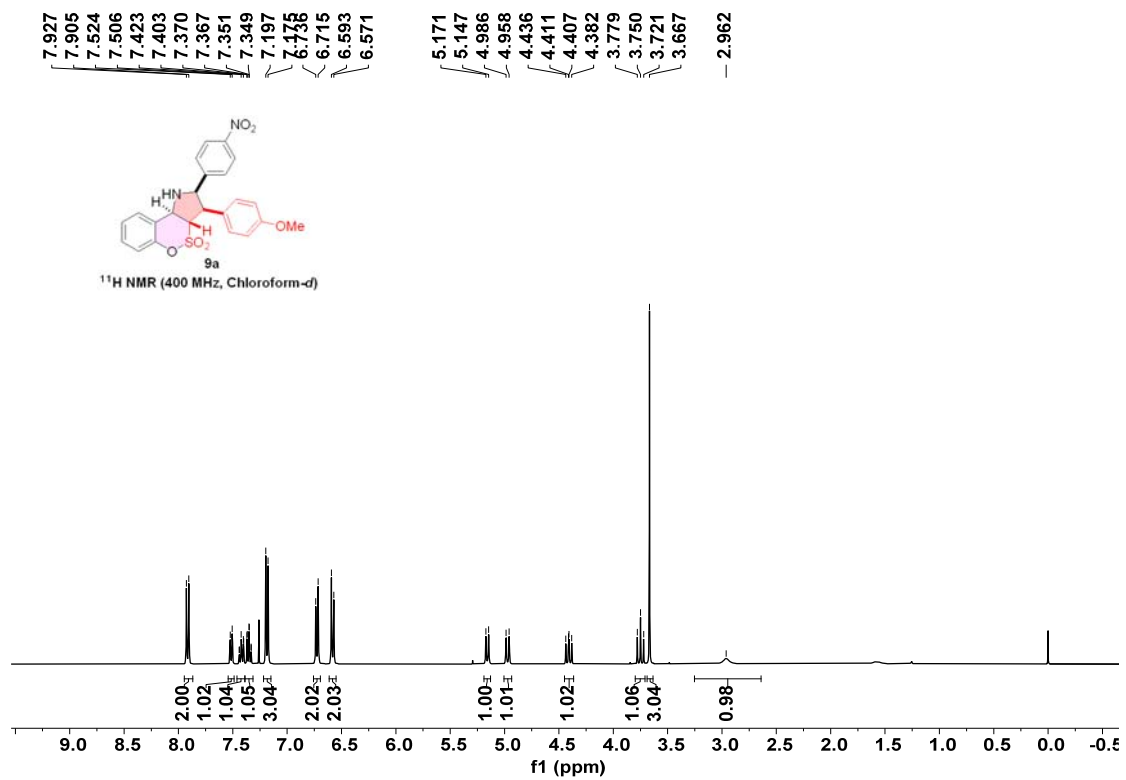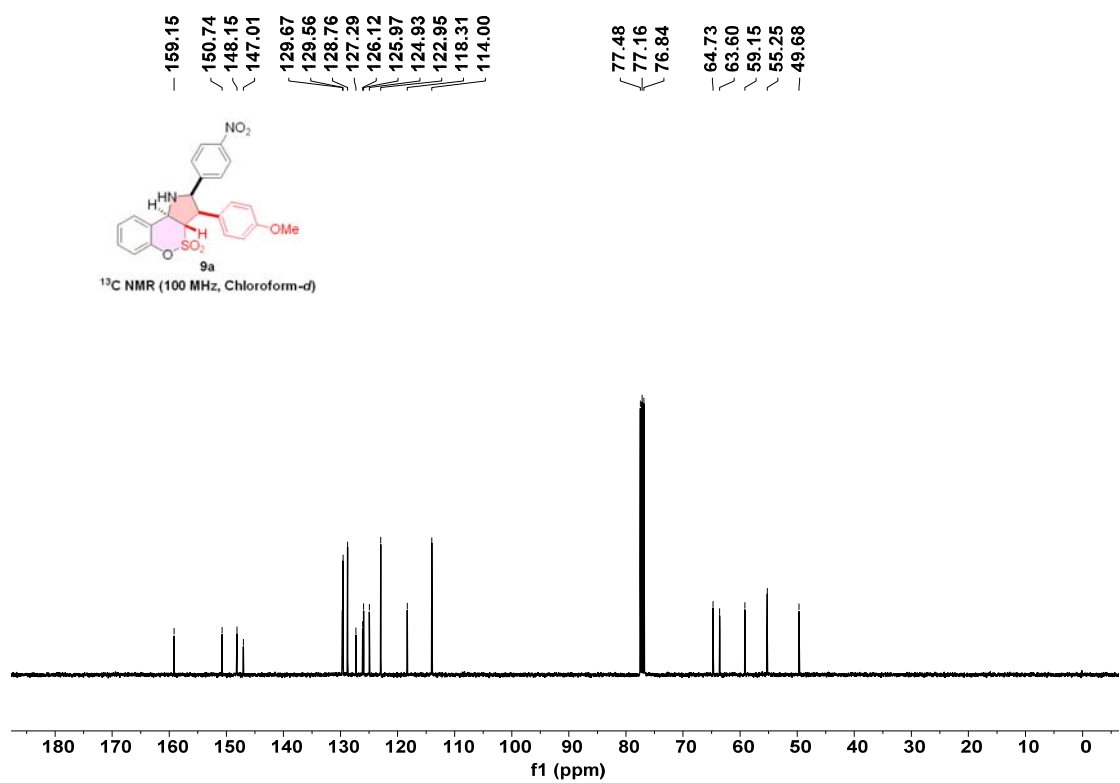

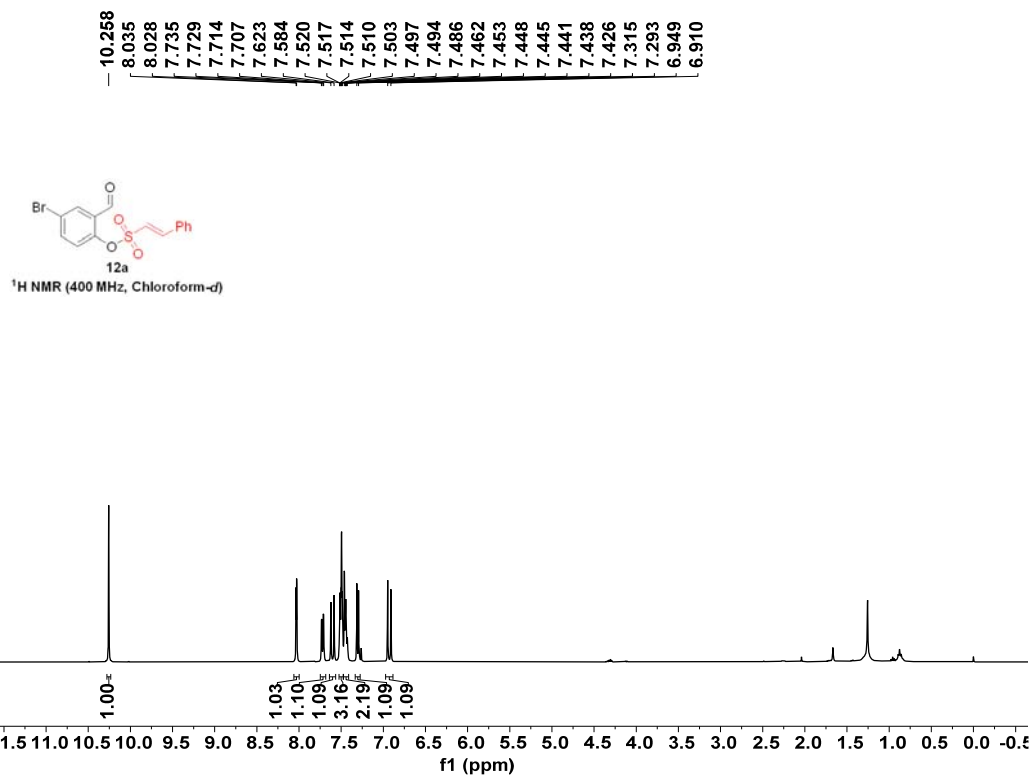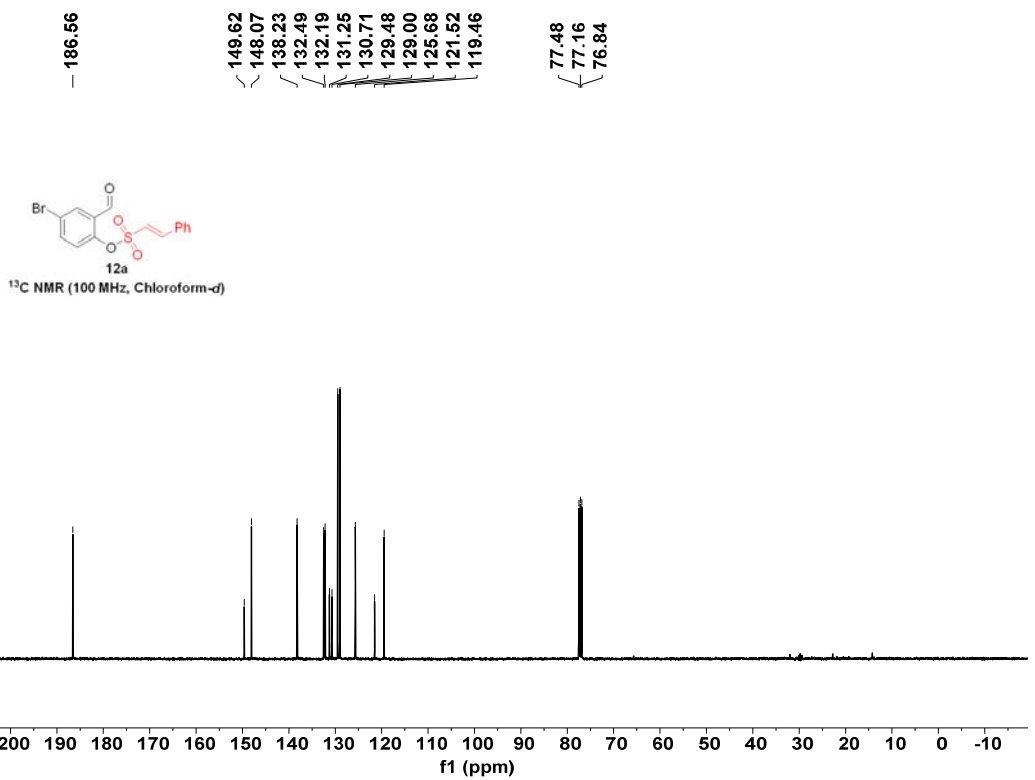

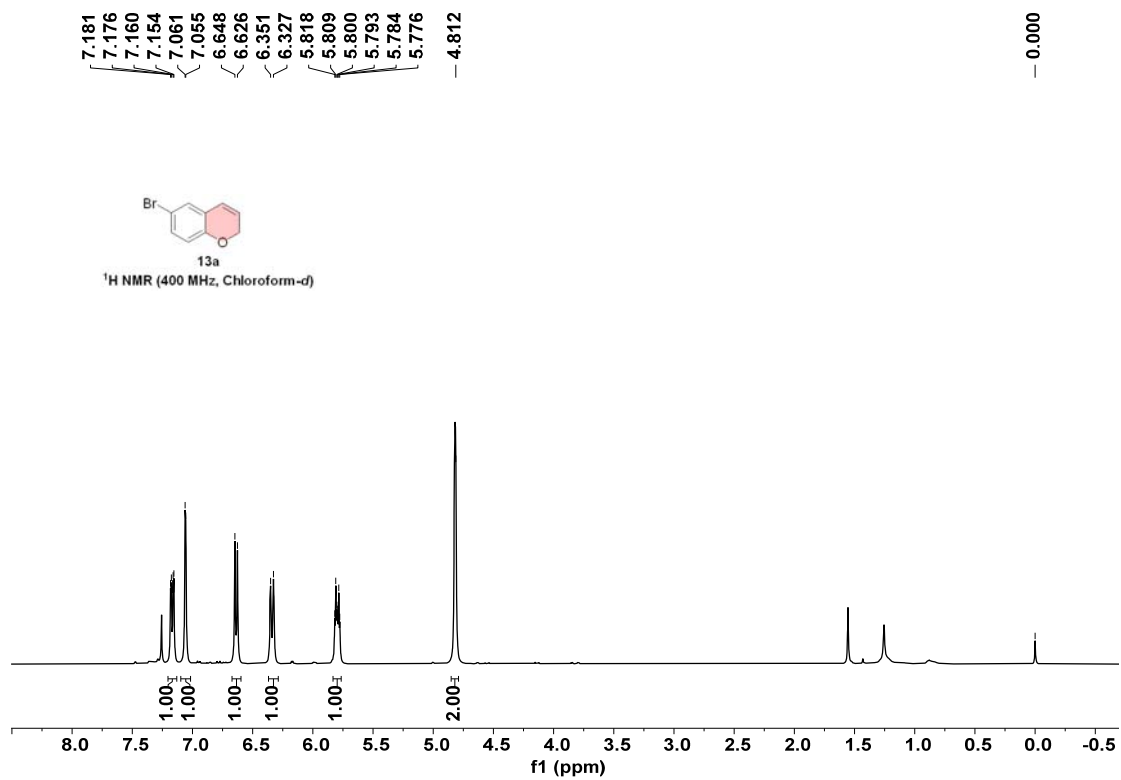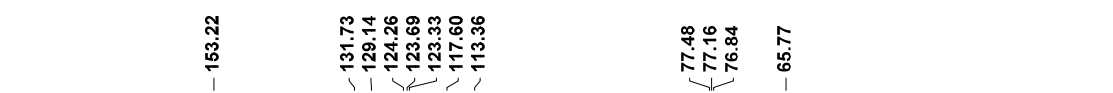

Supplement: d4qo01325e1.pdf [file d4qo01325e1.pdf]
